# Supplementary material for: Genome-wide identification of transcriptional start sites in the haloarchaeon Haloferax volcanii based on differential RNA-Seq (dRNA-Seq)
Source: BMC Genomics. 2016 Aug 12;17:629. doi: 10.1186/s12864-016-2920-y (PMC4983044; doi:10.1186/s12864-016-2920-y)
Supplement: Additional file 1: Table S1. — Summarizing the statistics of sequencing and read mapping. For each of the six sequencing runs (three with, three without TEX treatment) the number of reads, the number of mapped reads, etc. are tabulated. (XLSX 9 kb) [file 12864_2016_2920_MOESM1_ESM.xlsx]

## Sheet: read_alignment_stats
Libraries	Würzburg_TEX_neg	Würzburg_TEX_pos	Frankfurt_TEX_neg	Frankfurt_TEX_pos	Ulm_TEX_neg	_TEX_pos
No. of input reads	5988331	5097764	5159327	4206124	92291375	93952060
No. of reads - PolyA detected and removed	2849458	2309016	2746407	2294176	64243486	43956466
No. of reads - Single 3' A removed	467201	290124	369978	228538	3306265	5618553
No. of reads - Unmodified	2671672	2498624	2042942	1683410	24741624	44377041
No. of reads - Removed as too short	362030	750053	388919	599892	39411254	1438643
No. of reads - Long enough and used for alignment	5626301	4347711	4770408	3606232	52880121	92513417
Total no. of aligned reads	5320270	4256932	4559309	3443197	47111821	84103354
Total no. of unaligned reads	306031	90779	211099	163035	5768300	8410063
Total no. of uniquely aligned reads	2572660	3546624	1830699	2570292	31957031	67613255
Total no. of alignments	8392856	5309716	7619799	4811145	69146580	104923605
Percentage of aligned reads (compared to no. of input reads)	89	84	88	82	51	90
Percentage of aligned reads (compared to no. of long enough reads)	95	98	96	95	89	91
Percentage of uniquely aligned reads (in relation to all aligned reads)	48	83	40	75	68	80
CHR - No. of aligned reads	4835434	3589622	4217743	2912901	41643085	72981768
CHR - No. of uniquely aligned reads	2122637	2916909	1519398	2083615	27033135	57084605
CHR - No. of alignments	7699613	4414525	7065222	3961245	59278910	90829537
pHV1 - No. of aligned reads	78558	88468	56338	85731	748051	1895976
pHV1 - No. of uniquely aligned reads	74877	85426	53251	81136	666075	1822454
pHV1 - No. of alignments	109129	114433	86937	133177	1620066	2401254
pHV3 - No. of aligned reads	60505	103943	45327	77093	856995	1924542
pHV3 - No. of uniquely aligned reads	57548	100461	42730	73326	819547	1866684
pHV3 - No. of alignments	75306	125405	61931	101245	1077900	2195451
pHV4 - No. of aligned reads	345773	474899	239901	367471	3863689	7301068
pHV4 - No. of uniquely aligned reads	317598	443828	215320	332215	3438274	6839512
pHV4 - No. of alignments	508808	655353	405709	615478	7169704	9497363
