# Supplementary material for: Genome-wide identification of transcriptional start sites in the haloarchaeon Haloferax volcanii based on differential RNA-Seq (dRNA-Seq)
Source: BMC Genomics. 2016 Aug 12;17:629. doi: 10.1186/s12864-016-2920-y (PMC4983044; doi:10.1186/s12864-016-2920-y)
Supplement: Additional file 2: Table S2. — Containing the dRNA-Seq results. Summary of all of the TSSs identified by the dRNA-Seq approach and the additional selected parameters, e.g., replicon, localization, strand, identification in the three datasets, TSS class, associated gene, and promoter score. The first Excel sheet contains the results, and the second Excel sheet contains a list of columns and definitions. (XLSX 572 kb) [file 12864_2016_2920_MOESM2_ESM.xlsx]

## Sheet: Suppl. Table S1
Replicon	5´-end (Position)	Strand	Coverage Average	TERM4ENRICHMENT	Protein coding leaderless start	leaderless start distance	Coding 5´-UTR start	UTR Length	HVO (Correct or downstream feature)	Length (AA)	FC	Novel	sense/antisense to	HVO sRNA novel	previously known RNA	previous Start (known RNA)	extension/reduction 5´-End	Promotorscore (stringent)	Promotorscore (relaxed)	distance TSS centered TATA-box	70bp Upstream of Start
CHR	278	Fwd	18.0667	e01-								iTSS	HVO_0001	0001n1							TATACGCCGCCGCGGGCGACTATTCCACTTGAAACAAAGGGGTATTCACGATGGACGAGGAAGAGAATCCG
CHR	1109	Rev	37.18	e1-1								aTSS	HVO_0001	0001n2				6.08		-28	GTTTGTCGATTTCGTCGAGCATGATGACGACCACCCGCTCTTTGTAGTCGACGGCGTCGAAGAACGTCGTG
CHR	1250	Rev	23.4267	e111								aTSS	HVO_0001	0001n3				5.5		-28	GGCTCGACTTGACCCGGGGGTCGAGGAAGTCGGTGAACTTCAGGTCGTTCGAGATACCCATAATGGAGATG
CHR	1707	Fwd	12.9633	e1-0								iTSS	HVO_0001	0001n4					4.37	-28	CTTCGCCATCATCCTCCTGGAGAAAAACGGCGTCCGCAACATCAACACCGGCGAGGTGTTCAACATCTACA
CHR	2864	Rev	163.48	e001	2863	1			HVO_0002	287	SEC							5.77		-27	GTGCGCGACACGCGGCAAAAAGGATGCCGAAACCCAGAACGTTGAAACCCAGTCCGGGTAAACTGGGAGTG
CHR	4702	Rev	11.7367	e--1								aTSS	HVO_0004	0004n							GATGCGCGTCATCGGTGCCAGCCCGACTCGGTTGGAAAGCGACAGGTCGTTCAGGCTCGTCGCGTCGAACA
CHR	6789	Rev	142.567	e111			6745	44	HVO_0005	269	TP								2.49	-28	GGATAGTCGAGCCTCGCGGCCGGCGAGAACCGACGGAGGGAATACATACCTCCCGCTCGTCAGGTGGTCCA
CHR	7282	Rev	20.1033	e111	7282	0			HVO_0006	142	CHY								3.01	-28	GACGCTGAGACGGCCCGTACCGACGCCTCGCGGGCGGAGATTTATCACCGAAGCCGCGGAACGTTCGGGCA
CHR	7656	Fwd	5.36	e--1								iTSS	HVO_0008	0008n1							CTCCGCGATGGGCTCGACGACCGACGACCTCCTCGACGAAATCAAGTTCGAGGCCGACGACCGCGACCGCG
CHR	8244	Fwd	12.82	e--1								iTSS	HVO_0008	0008n2							CGGCGGGACGCTCATCGAAGGCGAGTTCCACAACCTCATCGACATGCAGGAAGAGCCCCTCGCGTGTCTCA
CHR	8872	Rev	202.473	e11-								intergenic		0007n					3.65	-28	GGGCGGCCTCGCGCTCCTCGCGCGAGGGGAGTTCGATGGGCTCGACCATCTTCGCCTTGTACGATTTCATG
CHR	8873	Fwd	148.347	e111	8873	0			HVO_0009	448	AA										CCGAAAACCGGGCGTAGCCCCTCGATTTTCCGCCTGCCGATTACTTCACATTCGCGGACCTATTGCGGGCA
CHR	10145	Fwd	43.01	e01-								iTSS	HVO_0009	0009n					2.23	-28	CCGCGAACACCTCGAACACGTCGCCGAGACGGCCGCGAAGGTGATGGCCTCGGCCGGCGAATACGGCGGCC
CHR	10907	Rev	72.4467	e111	10907	0			HVO_0010	219	GEN								3.64	-28	CTCCTTCTACAACGGCGAATAACGCCGCCGCGGCCCGAGATTTTTCACCCGCGACACCGTACACCGAGCCA
CHR	11528	Rev	76.9467	e010	11528	0			HVO_0011	190	NUM							8.08		-28	TCGTCGCACGGTGACGGACGGACGTGCATAAACCGCCAACTATTTCCCCCTATTCTATCCACTGTCGTGTA
CHR	11657	Fwd	449.33	e111											HVO_0012	11661	4		2.98	-29	ACCGTGCGACGAAATCCCACGGCGGAATCGACACGCAACGTTTACAAATACCCGCGAAGTACGAACTGATG
CHR	14488	Fwd	2.8	e--1								aTSS	HVO_0014	0014n							CGTCGACGAGGTGGACCTCGTCGGCGACGACGCAGGTGAGTTGGTCCATCCACGCCGCGTTGTTCCGGACG
CHR	14872	Rev	36.9467	e101	14871	1			HVO_0014	827	RRR								4.28	-29	ACGCGGGGACGTGGGTCGGCGACCGAACCGACCCGATGGCTTAAACCGGGGGACGGTCCAAGGGAGATGCA
CHR	14980	Fwd	91.6367	e101	14980	0			HVO_0015	81	EM								1.87	-28	GGTCGGTTCGGTCGCCGACCCACGTCCCCGCGTCGGCAGGGCTTTGTACGGCCCGGCGGTACGATGGCGCA
CHR	15707	Fwd	29.3267	e001								iTSS	HVO_0016	0016n							GTACCCCGCCGAGTGGCTACCGGACGACGCGCCCCAACAGCTTCGGCGCTACGCGTCGTCGGATTTCACCA
CHR	16936	Rev	138.94	e111	16936	0			HVO_0017	192	CHY								3.2	-28	CGTTACGATTCCGGGACGACGCCGCCCGAGCGGCATGAAGGATTAAGTCGGCAGGGTAACTGCTTGGGGTA
CHR	17037	Fwd	24.65	e111								aTSS	HVO_0018	0018n				5.4		-28	CTTCATGCCGCTCGGGCGGCGTCGTCCCGGAATCGTAACGTATGTTCACGCCGCCGGGCGAGGTCAGAACA
CHR	17615	Fwd	13.5467	e111	17615	0			HVO_0019	226	GEN							6.52		-28	CGTCGTCGGACTCGCCCGTCTGTGCGGTCCGGTCCGAACGCATTTTCACCCCGGCGCGCGAGGCTCCGATA
CHR	21288	Rev	11.5333	e--1								iTSS	HVO_0022	0022n1					1.56	-27	ACTTCGCGCAGTACGCCCAAGAGCCGCCGGAAGCCGTCACGTTTTCGTACGACCGGCTTCAGAACAACCTG
CHR	21350	Fwd	28.0933	e111								aTSS	HVO_0022	0022n2							CAGTCACTCAGGTTGTTCTGAAGCCGGTCGTACGAAAACGTGACGGCTTCCGGCGGCTCTTGGGCGTACTG
CHR	24186	Rev	7.99667	e--1	24186	0			HVO_0024	258	MIS										CTACCCCGGACATGGGGCGAGGGGTGCGAGGAGGGGCGGACCTAAATCCGCGGCCCGGAAACGTGGGGGCA
CHR	24753	Rev	6.20667	e--1								aTSS	HVO_0025	0025n1							TCGTTGTCGACCCAGTAGTCGCGGCCGCCGTTCATCAGGTGAACGTTCTCGTGGCCGTAGTACTTGAACTG
CHR	25162	Fwd	81.37	e1-0								iTSS	HVO_0025	0025n2							TCTGCCGACGAACTCCGCGACCTCTACGCGGACCAGGGCATCGAAGGCGACGAGTCCACCATCGCCTACTG
CHR	25612	Rev	75.9933	e1-1								iTSS	HVO_0026	0026n					3.51	-28	GGTCGCCGTCGCGCCCGACGGGACGCTCCCGGCCTTTGCCTTCTTCACCGCCGGCCTCGTGAACTTCTTCG
CHR	26974	Fwd	11.5167	e-11	26974	0			HVO_0027	199	CHY								3.12	-27	GGTCGTCACAGACCCGCGCCGGACTCGCCGCCGCCGATGGGTACAAACCCGAGACGGACATACGGGGCGTA
CHR	27433	Fwd	36.4933	e101								iTSS	HVO_0027	0027n1				6.3		-28	CGGCGACGCGGACCCGATGGCCGCCAACGACTTCCGCACGCTCAAATCCGATCTCAACGACCAACTCGACA
CHR	27771	Fwd	22.2167	e0-1								intergenic		0027n2				4.98		-27	CTCGACTTCGGCCTGGCTCGCTGTGCGTTATGCTCGGAACTTGTATCTTCGTTCGCCCAGTGCTGACAGCA
CHR	28101	Rev	77.8367	e111	28101	0			HVO_0028	89	CHY								4.02	-28	GGCGTACTTGAGCGAGGCGGTGCTTGTCGCCGGAGGAACGGTTTTGTGGCGGGCTATCGAACGTTCCCGTA
CHR	28189	Fwd	17.4833	e110	28190	1			HVO_0029	698	RRR										CCCGCCACAAAACCGTTCCTCCGGCGACAAGCACCGCCTCGCTCAAGTACGCCGCGACCCAACGACGGGCA
CHR	29119	Rev	46	e111								aTSS	HVO_0029	0029n1					2.69	-28	GCGCGTCGCCGGGTTCGCGGTCCGAGAGGTGGACCGAGTAGTTCTCGATGCCGGAGCAGTGACCCGTCTCG
CHR	29239	Rev	21.16	e--1								aTSS	HVO_0029	0029n2							CGAGCGAGTCCTTTCGGGACTTGTCGCCGGCGTACTGGCCCTTAATCTGCGGGAGCGTGACGTGCGACTCG
CHR	29416	Rev	7.42667	e011								aTSS	HVO_0029	0029n3					3.1	-28	TCGGGTCCACGAGGTGGGTCGGCCGGACGATTTGCTCGACGATTTGGTCGGAGTGCTCGCGCTCGTAGTCG
CHR	30834	Fwd	128.327	e101			30936	102	HVO_0031	56	CHY								2.88	-28	TGTGTGGTCCGTACCCAAATCAGTGGGTCGACATCAAGACTTATTACTCCGACTTCGCTATGCCCGTTCCA
CHR	30884	Rev	16.0167	e--1								intergenic		0030n							CGCCCGAACTATCGAGCACTCCGTGCTCGAATCCGCGGACCATTCAGGTAATGCCTCCGTTGGGGTAGGCG
CHR	31190	Fwd	8.68667	e--1								iTSS	HVO_0032	0032n							CATGAGCTCTCAGTCTCTCAGTCACGTCCAGAAGTCGTTCCTGAAGTACCAACACATCCTCGTGTTCATCG
CHR	33238	Rev	38.56	e-11	33238	0			HVO_0034	164	MIS							7.31		-28	ATTAATCGCCTTTATTTCTATTTTTCAAGAGGTAGAATAATTTAACCACGTCCGACTCTGACGGTGTGGCA
CHR	33261	Rev	10.94	e1--			33238	23	HVO_0034	164	MIS										CCGACCAATCGACAACCCGAGCGATTAATCGCCTTTATTTCTATTTTTCAAGAGGTAGAATAATTTAACCA
CHR	34879	Rev	112.68	e111	34879	0			HVO_0035	396	GEN								2.86	-28	GTTGGTGGCCGGGTGAGTGGGTAGGTGAGTAGCCGGCTAGCTTTATTCCGTCTCGGTGTCACTCTCCACCA
CHR	34980	Fwd	106.167	e110	34980	0			HVO_0036	64	CHY							5.45		-28	CTAGCCGGCTACTCACCTACCCACTCACCCGGCCACCAACTATTTGTCCGCGAACGCCCCACGCCCCGGTA
CHR	36568	Fwd	5.66	e--1								aTSS	HVO_0038	0038n							CGGTCCCGCGGCGCTCCTCGACGATGTCCCAGACGAGCGATTCGAGTTCGGACAGCGCCTGCTTGTACTCG
CHR	37328	Fwd	15.66	e111								aTSS	HVO_0039	0039n1					2.77	-31	GTAGGCGTCGTGGTCGGTGTAGAAGTTCAGCATCGCGAACTTGAGTTTGTTCGGCGCGATATCGACCATCT
CHR	38094	Rev	10.8933	e111								iTSS	HVO_0039	0039n2					4.6	-28	CCCGGTGCTGTCGGTCCGCCGCGACGGCGGCACCGACGAGATTTACGGCCGCGCGGAACTGTACACCTGTA
CHR	38826	Fwd	13.9	e-11								aTSS	HVO_0039	0039n3				4.75		-27	TCGTAGCCGCAGAGGTTCTGCTTGCCCGCGTACTCGAAAATCTCATCGGGCGTCCGCACGTCGTCGAACAG
CHR	39438	Rev	14.73	e111	39438	0			HVO_0039	734	RRR							6.1		-28	CCGGACCTGTCGAGTCCGGCGGTGTCGGGGGGTCCGAGCCTTTTAATCGGATGGCGGCCGAGATTCTCCCG
CHR	42099	Fwd	19.9867	e1-1								aTSS	HVO_0042	0042n							CCTCCTCGTCGCCCGACACCGAGGGCGTCGAGACCATGTCGTAGAGGAGGTGGCGCGCGTCGACCCACTCG
CHR	42965	Fwd	16.9267	e111								aTSS	HVO_0043	0043n					2.92	-28	AGCTGACGAACTCCACGCCGCCGGCGACCGGTTCGTAGGGCTTCTTGTACTTCTGTTTCCACGTGAGCGCG
CHR	46122	Fwd	94.6033	e111								aTSS	HVO_0046	0046n							CGGCGGTCTCGTGGGAGTTGACGACCGGGATTCCGTACGACTTCAGGAAGCGCGTGATGTAGATGCTCCTG
CHR	48378	Rev	8.00667	e1-1								iTSS	HVO_0049	0049n1							GTACGCCGCCTACTCCGAGTCCGCCGCCTCCTTCAACACGGAGACGGTCGACGGCATCGAACAGGCCGACG
CHR	49051	Fwd	26.65	e111								aTSS	HVO_0049	0049n2					3.72	-31	TGGACCAGACGCCCTCGTTGCCGCCCTGCACCGGGAGGTCTTTCTCGGCGGCGTACTCGATTTCCCACTCG
CHR	49493	Rev	550.28	e-01	49491	2			HVO_0049	405	AA							9.48		-28	GCGTCTCTACCTTTTAATTTCATAAACTGAATGCAAAGAATTTATCTGTGTGTCCCCGCCACAGACGAGTA
CHR	49728	Rev	9.15333	e--1			49491	237	HVO_0049	405	AA										CTGGTCGAACTCGCCGGGGAGTTGCTCGACTGAGGAAACGTTTGCGTCGCCGGAAGCGTTTAATAGGGAAG
CHR	49873	Rev	155.06	e111								iTSS	HVO_0050	0050n							CGCCGACCGATCCGAACGGCCACAGAACACTTACCGGAGGAGCCGTCACGTTGCGGGTGCTATGACCCTTA
CHR	49885	Rev	71.8533	e--1	49882	3			HVO_0050	38	HY								2.5	-29	TCGACCCGTCGACGCCGACCGATCCGAACGGCCACAGAACACTTACCGGAGGAGCCGTCACGTTGCGGGTG
CHR	51676	Rev	73.9833	e111	51675	1			HVO_0052	161	GEN							5.01		-28	CGCGGCGACGCTCTGGCTGCTCACCTGAGCGGAAGGCGGCTTTATTTTGCCCGCTCGCCAATCGTCGAGCC
CHR	54126	Rev	129.29	e101								iTSS	HVO_0055	0055n1				6.72		-28	GCGAGGACATCGAGCAGATTCCGCTCGTCTCCGGCGACGAACTCATCGGCGTCGTCCGCGACATCAACCTG
CHR	54776	Rev	28.2533	e11-								iTSS	HVO_0055	0055n2					4	-28	TGTGGTGAAAGAGACCGACGAGGGGACGAAGTACCGAGGGCTCATCTCTCGGGAGGACCTCATCGAACACC
CHR	54900	Fwd	22.34	e1-1								aTSS	HVO_0055	0055n3							CGGTCTCTTTCACCACAGGAACAGAAGAGAACCCACGCTCTTGGAGGTATTCCAGCACGTCGTCGCGCGTG
CHR	55000	Fwd	8.69	e110								intergenic		0055n4							ACCGCGGGTCATCGCGTCGGCTACTTTCATACACCCGCTTTCTTCCCCCCGCCTAATGTACTCTGCGAACG
CHR	55370	Rev	25.4433	e110								iTSS	HVO_0056	0056n							CGGCGACAAGGCCGAGACCGTCGCCGACCTGTTCGAAGCGACCTCGTTCCCCGAGTACGAGGTGTACCGCG
CHR	55670	Rev	14.0567	e111	55670	0			HVO_0056	192	CHY							7.65		-28	AACTACTGACCGGCACGGGACCACCCGTGACCTTCGATGCCTTTTACCATATACGTCGTCCAGAACGGGTA
CHR	55858	Rev	23.3333	e111								iTSS	HVO_0057	0057n					3.85	-27	GCCTGTTCTCGGGGAGCGACGAACCGGTCGGCGTCGAAAAGCTCGTCGGGGACGCGCTCGACGCGATACTC
CHR	57251	Rev	8.04	e--1								iTSS	HVO_0058	0058n							GAAGTCCACGCTCGGGCGCACGTTGATGCGCCTCGAAGAGGCCACCGCGGGCGAGGTCAAACTCAACGGCA
CHR	58244	Fwd	4.09333	e1--								aTSS	HVO_0059	0059n					2.71	-28	CCTTCGACCCGCTCAGTCCGCGGTGGAGGCGAAGCGCCTCCTTAATCTGGTTGCCGACGGTGTAGACGGGG
CHR	59362	Fwd	13.4167	e1-1								aTSS	HVO_0060	0060n1					1.53	-28	CGTTTGTCGCCGTGCCGAACGGATGGAATCTACCGAAGTCGTCGTACGTCAGCGGCGCGACGTTCTCGTCA
CHR	59613	Rev	13.02	e111								iTSS	HVO_0060	0060n2					2.04	-28	CGCGTACGCCTTCGCGGTGCTGGCGTGGGCGTGGAACGGCTATAAGCGGTTCCGCCGCCACTACCGCCGCG
CHR	59976	Rev	113.477	e1-0								iTSS	HVO_0060	0060n3				5.89		-28	GTACGACGGGTGAACCACAGTGAGCACGACAACCGAAACCGAAATACCGCTCCGACAACGAGTCGCTGAGA
CHR	59994	Rev	20.5833	e111								iTSS	HVO_0060	0060n4							TATCGACCCGCGCGTCGGGTACGACGGGTGAACCACAGTGAGCACGACAACCGAAACCGAAATACCGCTCC
CHR	60220	Fwd	8.25	e--1								aTSS	HVO_0061	0061n				6.62		-28	CCCCGTTGATGGCTGCGTTGAAGAACAGCCAGCCGAGGCCGTTAATGGCGAAGACCGTCTCGACGAACACG
CHR	61305	Fwd	20.8033	e111								aTSS	HVO_0062	0062n1							CAAAAATATCTGGCCGTTTCGATTGAGACGGGACGCGAAAGCGTTCCCGTGTTCCTCGGTTTTATCGGTTG
CHR	61737	Fwd	8.84	e--1								aTSS	HVO_0062	0062n2							TGTACGCTTCGAGCTGACCGTTGCGGCCGCGTTCGAGAAGCGTCGAGAAGTCGGCCTTCTGAATCTGCATG
CHR	62097	Fwd	9.94667	e--1								aTSS	HVO_0062	0062n3					3.76	-27	TCAGGACGTAGGCGAACGCCTGACGGACCGCCTTCGGGACCTTGTTCATGTTGAAGCCGACGTAGTAGATG
CHR	62207	Rev	32.3467	e11-								iTSS	HVO_0062	0062n4					2.93	-28	CACGGCTCGCTACAACTACGCGATGAACGAGAACGCGGACTACTTCGGACTGCCCACCGCGCAGTACGACC
CHR	62629	Fwd	3.72333	e--1								aTSS	HVO_0062	0062n5							CTCGGTCTCGCCGACTTCGACGCCGAGCGAACCGGGCACGTAGTTGCCTTCGTCGTCCGTCTCGTGTTCCA
CHR	62944	Fwd	10.12	e1-1								aTSS	HVO_0062	0062n6							GCCCGACGACGTGTCGGTCGCGGCGACGGGGTCCATCGTCGTGATGGTGCCCGAGAGGATACGGTTGAACA
CHR	63196	Fwd	19.5467	e--1			63370	174	HVO_0063	55	CHY										GTCTGGCATTCAGAACGAAATTTTCCCGGCGCGTGGATAAACTTACCGTATTCGATTTGTTTGATATAGTG
CHR	63370	Fwd	579.24	e100	63370	0			HVO_0063	55	CHY							5.23		-28	TCAGTCAACGGGACACTTCTCGGCCCGCAGTTTCGGTCCACTTATATAGGGGTGTCACTATGTATCATACA
CHR	63525	Rev	107.537	e011								aTSS	HVO_0063	0063n							AAAATGTGAATGGTCTGTCCGCCGGGCGTCCAGCGGCGGGCTTACGGGGCCGGTGCGATTACTGCCACTCG
CHR	63622	Fwd	166.94	e111	63622	0			HVO_0064	139	GEN							5.19		-28	TAAGCCCGCCGCTGGACGCCCGGCGGACAGACCATTCACATTTTAGTCCGACTCGCTCGTGGTACGCTGCA
CHR	65368	Fwd	8.33	e--1								iTSS	HVO_0065	0065n					2.78	-28	CCCGAGGAGGCGAAGGAACTCCAGAACGGCGTCGAGAAGATTCTCGACCTCGGCGAGTATCTCGTCAACTT
CHR	67939	Rev	9.4	e--1								iTSS	HVO_0066	0066n					4.04	-30	TAGTGTTGGTTTCCGATGAGCAGGGACGACTAGCAGCGTACAACACTGATGAAGAGCGTCAGTTATGGACA
CHR	69249	Fwd	778.937	e111	69249	0			HVO_0067	95	GEN							5.43		-30	CTGGGCTCGCTCGACCTCGACGCGGATTCGGCCGTTCCTTTTTATCCGCTCGCGCGACGACTAGTCGCGTA
CHR	69371	Fwd	29.0033	e-01								iTSS	HVO_0067	0067n							GAACCGAACTCGGGAGCGTCCGCGGTTTCGACGACGACGGCTTCTTCGTGACGACCCGCGAGGGACTCGCG
CHR	72538	Rev	1258.86	e111	72538	0			HVO_0070	125	GEN							6.08		-28	GGCGGGTCTTCGGCGTCGAGGCGTAACCCCGAACCAAAGGCCTAAGCACGTTCACCTCGAAGCCGCGTGCA
CHR	72732	Rev	28.3633	e100								iTSS	HVO_0071	0071n					2.54	-28	CGAGTTCGACTCGTCGCTCATCCACGGGGTCGACCAGCAGATTCTCAACGAGTCCGAGCCGTTCTACGATG
CHR	73310	Rev	18.51	e1-1			73280	30	HVO_0072	73	CHY							5.73		-28	CGCGTTCGCGTTCGCCCTCGGGGTCGAAGCCCGCGAAATCCTCATATCGGATGCTTGTGTATGTCATGGCA
CHR	74504	Rev	45.3333	e1-0								aTSS	HVO_0074	0074n				7.04		-28	GCGGGAGTTCGATGGGGTCGGGCGTGAGGTCCTCGTAGTCGATTTGGTCCAGCAGGTGCGAGATGCAGTTG
CHR	74912	Fwd	13.7133	e111								aTSS	HVO_0073	0073n				6.43		-28	TCACGTACGACCCGCGCGAGGAGACTTTCACTTCGCCGTCTTCTTTCTCGGCGAACGCGAGGACGGGAATC
CHR	80163	Rev	10.3433	e--1	80163	0			HVO_0078	363	COM										CGTTCGGATTCGACCCGGCGCGCGGGAGCGAACTGGTGGGCTTTTCAACGCGGGGGCCGGACTGACGCGTA
CHR	80783	Fwd	19.5633	e011								iTSS	HVO_0080	0080n				6.96		-28	TCGCCTCGGCCGCCTCGCAGTCGTGTCGAAGTGCCGAACAGTTATCGGCCTCCGCGGCGACGACTCCGACG
CHR	82339	Rev	18.8833	e100	82339	0			HVO_0081	445	COM								3.03	-29	CGCCAGTTCGACGGCGGCAGGTGCGGCCGACCCAGTAAGGTCTTTCCCGCGAGCGGCCGAACCGCCGCGCA
CHR	83207	Rev	81.1833	e111			83186	21	HVO_0082	234	CHY							8.02		-28	GTGACCCCCCACGGGGCGAGAGCCGAACCCACGCGAAACCGTTTTTCCCCTCCGCACCGAGCGTCGTGACG
CHR	83753	Rev	43.4867	e101	83753	0			HVO_0083	123	REG								2.34	-28	CATCCGCACCGACGGCTCCGGCGTCCCGAGCGGGGATGGATTCATGACGACGGGACGGGAGGACTAACCCA
CHR	85216	Rev	5.84667	e--1			85127	89	HVO_0084	456	TP							8.58		-29	CTCAGAACACCATTTTGTAGACGTTTGTCAACGCGAACCGTTATATGAACGTCTTGAGATAGCATCTCTCA
CHR	85544	Rev	14.9933	e--1								iTSS	HVO_0085	0085n				5.53		-28	GCCGACGCCGCCCAGACCGGCGAGAAAGGCGACGGCAAGATATTCGTGCTCCCCGTCGAGAGCGCGGTGCA
CHR	88608	Rev	15.1567	e111	88608	0			HVO_0087	327	COM								3.8	-27	ATGGTTTGGATAACGCGGCGCGAACCGACGGGAGCGACGGCATTTTGCCGCCGCCGACCGAACCCGGCGTA
CHR	89341	Fwd	11.4233	e--1								aTSS	HVO_0090	0090n					3.73	-27	GCTGACGTTAGTGGAGGGACTGCTGTGGGGTGGCCGTCACTTTGTTCGGTTAATATCGAGTTTTTCCTTCA
CHR	89471	Rev	290.297	e110	89471	0			HVO_0090	54	CHY								3.44	-28	TTAGTCCGTGAATAACCCGGAACGTGCCGTGGGGCGTAGAGTTAAATCCTATCGGAACTGAAGGGGCGGTA
CHR	91928	Rev	19.66	e111	91928	0			HVO_0093	335	CHY								4.08	-28	AGCGGGGATGGAGCCGAAATTCGGGGCTGTCGCAGGAAAGCGTAAAAACAATCGCCGAACTACACCGTGTG
CHR	93161	Fwd	8.42	e1-1								aTSS	HVO_0096	0096n					3.04	-29	TCCCGTTCACGTCGGAGTCGTCGACGCCGGTTCGACGGTTTTCTCCCGCTGCTCGCGCTCCTCGCGGAGTG
CHR	95038	Rev	16.5667	e111	95038	0			HVO_0097	294	CHY							8.22		-28	GGAAACGTAATCGGCCGGCGCCGCCGACCCGGCGAGAGGTTCTTGTCGGTTGGCGTATAACTTTCGTTCCA
CHR	95079	Fwd	44.8733	e111			95156	77	HVO_0098	67	CHY								3.4	-28	GCCGGCACAGCCTTCGCAGTCGACGCGCATGGAACGAAAGTTATACGCCAACCGACAAGAACCTCTCGCCG
CHR	95156	Fwd	142.19	e101	95156	0			HVO_0098	67	CHY								1.97	-28	CGGCGCCGGCCGATTACGTTTCCGCAGACGCGGCGGGGCGCTTTTGCCGCCTCGGCTCTTCGGTTCCCTCA
CHR	95314	Fwd	17.85	e1--								iTSS	HVO_0098	0098n					3.35	-27	CCGGCGGGATGACGCTGGAACTCGTCGACGGCTCCGAACACTTCCTCTGTTTCGACTGCATGGAGCGACTC
CHR	95441	Fwd	45.7733	e011	95441	0			HVO_0099	636	GEN										TCGGCCTTGTCGATGCCGCGACCGCACCCCGGAGCGGTGGATTTAGGCCCGTCCGAGGACTCCATTGACCG
CHR	97438	Rev	465.217	e110								aTSS	HVO_0099s	0099n1				5.59		-28	TGTCGGGCGGGGTTATCACTCGTGGGAACCGGTTCAGAAACGTTAATTACCGGCCGACCGACCCACACCCA
CHR	97533	Rev	17.6867	e111								intergenic		0099n2					2.74	-31	AAACGTGGCGGAGGCGGCGACTCTCCTGGACACTATGGCGATTTTTGCCGGACAAACGAGATGTGATGGCA
CHR	97641	Rev	18.25	e011								intergenic		0099n3							TGAGAAAGCATATCAAAGACAAAGTTAGTAGAAATATAGATTTACAAACGTTGCGCTATTCTCCATCTACG
CHR	97749	Fwd	690.137	e111			97756	7	HVO_0099A	64	CHY							9		-28	TTCTACTAACTTTGTCTTTGATATGCTTTCTCACGAAATAGTTAACACCAATGCCCCTGAATGGTGGAGTA
CHR	99215	Rev	72.3267	e101	99214	1			HVO_0100	375	GEN								3.39	-27	TTGCTGACGGCCGAGGCTCACCGGCGCGCCGTGACGCCGAACTTAAGCGGTCGAACGGACTAGAGCCGTCA
CHR	99933	Rev	74.0333	e01-	99930	3			HVO_0101	212	GEN										CGCACGCGACCGCCCCAGTCGTGAAGAATCGGAATATACCGTTTTGCCGCGGGAGCGCGTAGCTCCGGGTG
CHR	100055	Fwd	169.24	e101	100055	0			HVO_0102	293	MIS							8.31		-28	ACTGGGGCGGTCGCGTGCGAGGGCTTCGCACTCCAACAGCGTTTATTAGCCGGATTACTAATCACGTGGTA
CHR	101807	Fwd	145.78	e111	101807	0			HVO_0104	343	RRR								3.31	-28	ACGTCTCCCGTTTTCACTTTCATCTTGCTGTTAACGAGGGTTTATGAGGGTATAGGCGGAACGACTGGGTA
CHR	101972	Fwd	8.66	e111								iTSS	HVO_0104	0104n1							GGTCGCCAGCCCCGGCGAACTGTCGAACAAGGCCGACATCGGCTCCAGCACGGCCTCCGACATCATCAACG
CHR	102449	Fwd	23.5133	e001								iTSS	HVO_0104	0104n2							CAAGATTCACGTCGCGAAGGCGTTCAACTCCAACCACCAGATTCTTCTCGCCGAGAAGGCCAAGGAGCTCG
CHR	102635	Fwd	13.7767	e--1								iTSS	HVO_0104	0104n3				4.84		-28	GCTCAACAAGCACCTCCACGACCTGATGCGCATCGGTGACCTGTTCAACACGGGCATCCTCGTGACGAATC
CHR	103078	Fwd	942.937	e110			103089	11	HVO_0105	381	GEN										CCGCCGCTTGGTTCTCATAATGTTGGAAATGGCTTGCAATACTATCTCGTCGGCGGCCTACCGTTTAGGTA
CHR	105791	Rev	19.87	e--1								iTSS	HVO_0108	0108n				5.32		-28	CGGTTTTTCGCGGTGTCGGAGCGCGACCGTCCCAATACATTTGTCCCGCTGACACGTCGTCGGAGCGTATG
CHR	106621	Fwd	13.8633	e01-								aTSS	HVO_0109	0109n					3.85	-28	GACGGTTCCGAGGGTGTTCGAGACGTGGACGACCGAGACCATCTTCGTGGAGTCGTCGATGAGTTCCTTCG
CHR	107148	Rev	621.733	e001	107147	1			HVO_0109	426	AA								4.39	-28	AAACCGAAATCGGTTGCAGAGCCGCGTGCGGACCGAAGACGTGTTGTGCCTACGGCGGTAACTCACACCCA
CHR	110198	Fwd	13.65	e111	110198	0			HVO_0114	184	MIS								1.77	-28	CCGCCCGCGAGGGTGACGCCGACCGCGACCCGGCGGAACGTTAACGTCCGGTTCGGGTCAACCACCTGCCA
CHR	110900	Fwd	1359.34	e001	110903	3			HVO_0115	50	TL							7.63		-28	TGCGGACGCCCCTCACACGCCCGAAACTCGAAGGAACAAGATTTTATGCGGAGGATGGAAAGTACAGCCCA
CHR	112088	Fwd	720.957	e001	112088	0			HVO_0118	58	TL								3.13	-28	CCCCCCGTTTCTCGCTTCAGTTTCGCTCCGAGTAGGAAGACCTTTCCCGCTCGCCACCCGACCGACGTGCA
CHR	114205	Rev	7.62333	e111								iTSS	HVO_0121	0121n							GGGTCGAGACTCGCGGAGACGCGGGTCGCGAGCGCGCTGAACTACGTCGGCGCGGGGACGATGCTACTGCT
CHR	117964	Fwd	8.25333	e1-1								iTSS	HVO_0124	0124n							TCCGGTCGTGACGACTACCGGCGACGTGTTCGGCGTCCTCTTTTTACTCATCGCCGTCAGAACCGTCCTCG
CHR	118240	Fwd	5.74	e11-								iTSS	HVO_0125	0125n							CCTCGCGGCGCGACTGTCCACGTCGTTCCACCTCGGGACGCTCTCGTTTTCGCCCCGCGACGACGAACTCG
CHR	118620	Fwd	19.3533	e111	118620	0			HVO_0126	339	CHY							5.68		-28	GCTGCCCCCGACGTTCGAACGCCTCCCGCCGACCGACGCCGATTAGTTCGCTCGGCACCGACCGTCGGTCG
CHR	120662	Rev	13.8533	e111	120662	0			HVO_0128	189	COM							6.38		-28	ACCGGCGAAACCCGCCACCCGGAGCGACGTGAAGGGAGGCTTTAACAGCGCCAACGCGGTAACACCGGCTA
CHR	120802	Fwd	91.16	e111	120802	0			HVO_0129	125	GEN										TTCCCTTCACCCCGCTCCACCTCACCTCGACCACCCCGCTGCTTTTCGCCTCGGCCCGCGTACTACGCCTA
CHR	121221	Fwd	277.597	e111											HVO_0130	121223	2		3.91	-28	TCACGTCGCTGTATCGGTTCGACGGGTAGAACCCGATTCGTTTTTCTTGCAGGGACGGTTTGTGGGCATCG
CHR	121710	Fwd	76.8167	e111	121710	0			HVO_0131	91	CHY							6.96		-29	ACCTCGGATACGTGTGACCTACAAGTTAGGATGACAACATTTTTCGGTCGAGCGGCGCGAAACGCCCCGCA
CHR	121966	Rev	8.91667	e--1								aTSS	HVO_0131	0131n							GCGTCGTCTATCGTCTGTTCGAACCGTCCCCCGAACGGGGAGTCGCGGCGTTCACGACGACCCGGAATCGC
CHR	122298	Rev	39.1433	e0-1	122298	0			HVO_0131B	35	GEN								2.96	-28	ACGGGCCGGCCGACACTCGGCGCTCCGGTTCGCCCCAACGTTCACCACCGTTCCCGTGATAGCGGTACGTA
CHR	124194	Fwd	9.54667	e111								aTSS	HVO_0133	0133n					4.12	-28	CCTCGACGAGTTCGGAGTTGTCGATGGTGCCGCCGACGACCTTCTCGATGGAGACGTTGTTCGTGTCGATG
CHR	125534	Rev	194.583	e111	125534	0			HVO_0134	180	GEN								4.2	-28	GGTGTGCGACCGAGACACGCGGCGACCCGCCGAGCGAACGCTTAAACCACTCCGACGGGTATCGGGTGATA
CHR	125801	Rev	14.7	e101								iTSS	HVO_0135	0135n				7.51		-28	CCGCGCCGGCCTCGTCCACGGCGACCTCTCGGAGTACAACCTCATCATCCACGACGGCGAACTCGTCGTCA
CHR	126892	Rev	1221.46	e100	126892	0			HVO_0136	96	TL							8.99		-28	CGTTCCGTCGGACGCTTCCTACCGGCCGAACGTCGGCGGATTTAACCATGCCCACGTCGAACGCTCGCGCA
CHR	128890	Rev	38.7333	e11-								iTSS	HVO_0138	0138n					3.47	-28	CAACAAGCTCATCGACCTCCAAGCGGCGGGCTTCGAAGTCGTCGTGCTGCTGGCGGACGTACACGCCTACC
CHR	129109	Rev	86.4767	e111	129109	0			HVO_0138	328	TL								3.26	-28	TGGGTGTTGTCCGTTTCGCCCGCGGGCGGCTTCCAGAAGTCATATGCCACGTCCCCGACACCGGACGTGTA
CHR	129110	Fwd	7.73667	e1--			129199	89	HVO_0139	101	CHY										CCAGCGCGCGCACTTCGTCCTCCGTGACCACTTCGGAGGCGTTCCGAGTGATCAGGTCGTATGCGTCCATA
CHR	129198	Fwd	83.7367	e110	129199	1			HVO_0139	101	CHY								4.53	-27	ACGTGGCATATGACTTCTGGAAGCCGCCCGCGGGCGAAACGGACAACACCCACCGGTCCCAACTCCGGGTG
CHR	131589	Rev	1362.19	e111	131589	0			HVO_0140	689	GEN								4.03	-28	CGACACCCGAGGCGAGTCGGTATCCGCAACCGGCGTGGAGTATATATTCGGCGCGACCCTAGTCGCCGTCG
CHR	131726	Rev	17.7367	e10-			131589	137	HVO_0140	689	GEN										ACCGACGGCGGGTCGGGGATGTCAGAACTTATCACTCTACTTTCAAATAGCCGAAACTTGTTTGTTTCGTG
CHR	134026	Rev	13.32	e111								iTSS	HVO_0143	0143n					1.98	-30	AGACCGGGGAGTAGTCCGGGGGCCGCGGTACGGGTACGCTTTTCCCTCGCCCGCGCGCACCCGTCGATGTG
CHR	134088	Fwd	12.4733	e111								aTSS	HVO_0144	0144n							TTCTGCGGCACATCGACGGGTGCGCGCGGGCGAGGGAAAAGCGTACCCGTACCGCGGCCCCCGGACTACTC
CHR	135167	Fwd	8.1	e111	135168	1			HVO_0145	341	RRR							5.42		-28	CCCGAGGCGGTGCGGCCCCCCGACGCCCCGGACCGACCGATTCTTACCCGACCGTCTGCTACCGGAGTCCA
CHR	137251	Rev	37.55	e011								aTSS	HVO_0147	0147n							GGGCTCGGCGCTTGCCGCCGATAGCGACCAGTTCGACCGACGTTTGGTCGCCGGGTTCGAACCGGACCGCG
CHR	139184	Fwd	22.9	e111								iTSS	HVO_0149	0149n					1.57	-27	TGCGAACCGGCTTCCGAACTCCCCCTCGCACAGCGGTACACGCTATGAAACTCACCCCGAAAGAACAGGAA
CHR	142507	Fwd	17.16	e1-1	142507	0			HVO_0154	149	CHY								4.14	-27	GCCAGCGCGCCGTCCCGGCGAGGGATGTCGAGCACACAAGGCACTTAACGTGACAGATGAACAACCTCTCA
CHR	142759	Fwd	14.7767	e1--								iTSS	HVO_0154	0154n							CTGCGAGGGGTCGGAGCTCGTTCGCGTCCGGGTCGACGGTGGCTTCTCCGGCAAAGTCGTGTTGAACCCCG
CHR	143201	Rev	684.42	e111	143201	0			HVO_0155	68	CHY								4.01	-27	ACGGCCGCAGCCGAGACGGGTTTGTTCAACCGCGCGACAAGGCTATGAGCGAGCGCGTCGAAGCGGAGGCA
CHR	143223	Rev	25.2833	e111			143201	22	HVO_0155	68	CHY								1.48	-28	GCGGCGGTGCGGCGGCTCCGACACGGCCGCAGCCGAGACGGGTTTGTTCAACCGCGCGACAAGGCTATGAG
CHR	144416	Fwd	12.4167	e11-	144416	0			HVO_0157	103	CHY										ACCGCGGCTCCGCTGATCCTGACACCTCGACGACGGCGAGACTTATATTGGGCGCTCCGAATCCACTCGCA
CHR	144781	Fwd	149.56	e011	144786	5			HVO_0158	189	TC							7.41		-28	TTCACCGCCGCGCGTAAGCTGTCATTCCCTCGCACCAATCTTTTTAACCCTTAAATACGTGACTTAAATCG
CHR	147666	Rev	55.5	e111	147666	0			HVO_0161	281	AA							6.34		-28	ACTTCGTAGACGTGTCAAAAACCGTTCCGGCTTGCGAAAGTCAATTACCTCCGGGACGTGACGGAGAGGTA
CHR	149722	Rev	226.263	e111	149722	0			HVO_0164	115	CHY										CGGTAGTCCGATTCCCGAAAATCGAGAACGAGCACGCCCCCTTAGGTCCGAACCCCCAGTATCGGGGGACA
CHR	149886	Fwd	5.58667	e--1	149886	0			HVO_0165	430	MIS										CGAAACGGGCGGTCATCTCTCGCGGCCGCGAGACGGTGGATTCACCACCCCGCCGCCCCGAACGAGCGACA
CHR	151568	Rev	66.7833	e111			151560	8	HVO_0166	103	GEN								2.1	-28	GTCCGAAAACCCTACCGAAGGCGGTCGCCGCCCCCGAATCTACAAGTGTCAACCGTGAGATTGTACCGCCG
CHR	151659	Fwd	78.5733	e111	151659	0			HVO_0167	428	AA							5.35		-28	GACACTTGTAGATTCGGGGGCGGCGACCGCCTTCGGTAGGGTTTTCGGACCCCTCTCCGAACCCACGGGTA
CHR	154332	Fwd	22.7767	e-11	154332	0			HVO_0170	140	RRR							6.23		-28	CCGCGCATCTCGTCTGCGCTCCCGGACGCCGGTCGCCCCATTTATCACCGCCCGCGGCCGACTCCCGACCA
CHR	155649	Fwd	880.72	e011	155649	0			HVO_0172	67	CHY							7.85		-28	CGCGTGAGTGGCTCTCGTCGGGCATCCGCTCATCGAAGACCTTTTAGAACGGCCGCGGATACGTCGTCGCA
CHR	157058	Rev	26.9533	e111			157052	6	HVO_0173	366	RRR							5.68		-28	CGGCCGCACGGCCCACGCCGCCACCGCCGAATCCGTCGCGTTTATCGGTGGGCACCCGGAACGTGGCGGTA
CHR	157785	Fwd	11.43	e111								iTSS	HVO_0174	0174n							CGCCACGTCTACGAGGCGGGCTACGGCTGGAAGGAAAAGGCCGTCTCGGCCAAGCGCGTCATCGACCGCTA
CHR	161184	Rev	4.68	e--1								iTSS	HVO_0176	0176n							CGTCGCCGGGGCCGTCTTCGTGGGCGTCAACTACATCGGTGCCAAGGAGACCGGCGGCGTACAGACGGTCA
CHR	162463	Fwd	21.44	e-01								iTSS	HVO_0179	0179n							CGGCGACCTCCGGCGCGTCGCGCGGTTGCTCACCGACATCGGCATCCACATCGAAGACGAAGACCTGCTCG
CHR	162920	Fwd	84.7533	e001			162982	62	HVO_0180	259	RMT								4.52	-28	GGCAGCCGCGCCGCCCCGTCTCCGGGCGCTATCCGATGTGCCTTTCCGGGCTGACCACGTCACACCCGATA
CHR	164797	Rev	5.39667	e1--								iTSS	HVO_0183	0183n				12.35		-28	CAACATCGTCTCGACGGCGACGAGTCAGGCCATCGACACGGTCATCTTCGTCGGCGTCGGGTTCTACGCCG
CHR	167543	Fwd	21.0767	e--1								aTSS	HVO_0185	0185n				8.6		-28	TAAACGGCGGAAGCGCGAACAGCACCCCCACGACGAGACCGATTTTGGCCTGCAAGAGAATCACGTCGAAG
CHR	167786	Rev	130.593	e110	167782	4			HVO_0185	718	SEC							5.27		-28	CGCGCCGAGGGAGCCGAACTCACGCCCGCGGTGAAAAAGATTGATAACCACCAGACTGCTTTCGCCACGTA
CHR	169350	Fwd	34.2667	e111	169351	1			HVO_0187	106	CHY								4.53	-28	GTTCTGCCTCGCTTTCACCGACGGCCGCCCGTTCAGAAGACCTATGTCATAATAGTTGGAATCGTGACACG
CHR	170184	Rev	24.4233	e011	170184	0			HVO_0188	160	GEN										CCGTCTCTCTCCTCACCGGCAATGAACGTTCCGCGCGAGATTCACGGTCTCGGCCGCCCAACTGTTAGGTA
CHR	170259	Fwd	9.05667	e--1	170259	0			HVO_0189	212	GEN							5.46		-28	AACAGTTGGGCGGCCGAGACCGTGAATCTCGCGCGGAACGTTCATTGCCGGTGAGGAGAGAGACGGACGTA
CHR	170777	Fwd	107.01	e111								iTSS	HVO_0189	0189n					3.96	-27	TCGTCAGCCACGGCGCGCCGATTCGGCTGTCGCTCGGTGAGGTGAAGGGCCTCGACATCGTCGAGACGATG
CHR	171839	Rev	41.4133	e111	171839	0			HVO_0190	298	GEN							5.56		-28	CGCGTGCGCCCTTCGCGGTCGTTCGCGCCGGGGGCGAGGGGCTTTTGCCCGTCGGCCGGGAAAGGAGGCCA
CHR	173450	Fwd	5.94	e--1								iTSS	HVO_0191	0191n							CCATCGAGGCCGGCCGCTCGCCCCTCCTCGACGTGGACTTCTCGGACGTCGACCCCGTGGACTACGAGGTG
CHR	174066	Fwd	55.63	e--1	174066	0			HVO_0193	89	CHY							7.08		-27	GGAGAAGTTCGACTGACGCGGCCGCCAGCGCCAACACACGATTTATCTTAACACGCCGACAACTCCGCCCG
CHR	174608	Rev	21.01	e101								iTSS	HVO_0192	0192n							GCGTGCTCGGGTTCGGTTTCGCCGCCGACGAGGACTACAGCTATCGCTACGAGCAGCAACTGTCGGAAACG
CHR	174736	Rev	104.343	e111	174736	0			HVO_0192	135	CHY							6.29		-28	GCCCCGTGGACCGACAGCCCATCAGGAGTTGAGCCACAATAGTTAATTTCACAACAATAGATGCGGAGCCA
CHR	174758	Rev	16.7367	e011			174736	22	HVO_0192	135	CHY										ACGGGCGTCGTCGTTTCTGTGTGCCCCGTGGACCGACAGCCCATCAGGAGTTGAGCCACAATAGTTAATTT
CHR	174891	Fwd	1116.34	e-01	174892	1			HVO_0194	374	MIS							5.26		-28	ACGCCCGTCCGCCCCCCGTCGGACGCCGCCGCGGTAAACGATTAAGTCCCCCGCGCGTGGTACTTTACTCG
CHR	177195	Rev	67.5367	e111			177101	94	HVO_0196	55	CHY							6.73		-28	CGTACTCATACCCGTCGTTCCGAGCTCTCGGGGATAAAGCATATATAAGTGGAGATTGTTCCCGGTAAATC
CHR	178166	Fwd	116.043	e111			178195	29	HVO_0197A	49	GEN							5.24		-28	TCGTGCGCGATTTCGCGTGCGTACGCACACGCGCGAAGCCCTCATATGGGTGGGGGACTGTGTATCACACA
CHR	178439	Fwd	84.79	e11-	178439	0			HVO_0198	79	GEN								3.79	-28	ACGCGAAGCCAACTCCTCGTGCGCGAGGTCGGGCGCAGGGTTCATACCCGCGCCCCTGAACCATTCTCTCG
CHR	178741	Fwd	12.3833	e111	178741	0			HVO_0199	457	CHM										AGTCGTGAGCGCTTCTCCTCCCCGTCGGCTCGTAACGTAGTTTTTTGCTCCACCGCGGAGTGGTGCGCGTA
CHR	181207	Rev	12.33	e111	181207	0			HVO_0202	66	CP								2.67	-28	CGAGACGGAGACCGCCCCCGGCCGACGCCGAGCCGACGGACTGAAACCCGCGCCCGACCCACGAGCGACCA
CHR	181313	Fwd	253.4	e111	181313	0			HVO_0203	327	RRR								3.55	-28	CGGCTCGGCGTCGGCCGGGGGCGGTCTCCGTCTCGCACGGTTTATGTGCGGGGCGGTCGGTAGAACGGATA
CHR	184737	Rev	57.2767	e110			184730	7	HVO_0204	788	SIG							9.99		-28	CTCGCGGCGTGTTCTTGCTCATTGAGAACATGCCGCAACGATTATAGTTCTCGTCGCCCTCCAGTAGGGGG
CHR	185336	Rev	3.70333	e--1	185336	0			HVO_0205	161	GEN										ACGCCCGATTCCCCACAATTTCGCCCGCACGGGCCGCGTCGTTCATTTCCCACCCGAGCGAACGAAGAGTA
CHR	186218	Fwd	19.3933	e1-1								iTSS	HVO_0206	0206n							GGACCCCGACGGCGACTACGAACTCAAGGACGGCAACACCTACTCGCCGATGGACACCTACATCGTCGACA
CHR	189169	Rev	4.15	e1-1								intergenic		0207n							AGTCGCGGGCGAGTCATCGTGGAGAGACAATCGGTGCGGCTCTAAAGAAGTTGCGCCCGGAACGCTCACTG
CHR	189222	Fwd	19.48	e-10	189223	1			HVO_0208	237	GEN								3.22	-28	CCCGTCGCAGATGCCGGCAGTGAGCGTTCCGGGCGCAACTTCTTTAGAGCCGCACCGATTGTCTCTCCACG
CHR	190112	Fwd	43.46	e111	190112	0			HVO_0209	387	MIS								2.11	-29	TCGGTCGTCCGTCTTCCCCGAATCTCGACCGAGCGAATCGCTTTTCACCGCGCCGAGCGCAGGGTCTATCA
CHR	191317	Rev	7.48	e--1								intergenic		0209n					3.94	-28	TCATTGTGGGGCCTCTATCGTAACCTATGGGCGGGAAGATATAAATGTATGTGTACTGTTGTCATGAGACA
CHR	192245	Fwd	32.28	e011	192245	0			HVO_0212	124	GEN								3.33	-28	ACGTGGACGCCTCGCGGCAGGCCTGACGCGAAGACCAGACGTTATCTCTCCCCGCCGCGTCGCGTCGGCCA
CHR	192739	Fwd	924.623	e111	192742	3			HVO_0213	150	GEN								4.71	-28	GACGCTTCACTCACCCGACGGGCTCGCCGCGGCGAACAGGTATTTGTTGCCAGAGCGTCAATACGAAGTCG
CHR	193164	Rev	42.4433	e111								aTSS	HVO_0213	0213n					2.34	-28	GTGCAGTCGCCCGTCGGTCGGCGCTCGGTGCTCGGAGGACCTATTCGCGGTCGTACTCTTTCTTGAAACCG
CHR	193386	Fwd	511.203	e111	193386	0			HVO_0214	320	CIM							5.8		-30	CACAAAAGTAGTATTCCCAGTTCTTCGAAACAGGGGTTTATTTTATCAATCCGTCGCTCTAACGACCGGTA
CHR	193664	Rev	11.32	e--1								aTSS	HVO_0214	0214n							CGTTCAGCCCCTCGGTAATCTGCGGAATCATGTCGGCGAAGATGTCGGCGTTCCGCTCCATCAGGTCGAGG
CHR	196181	Rev	134.037	e011								iTSS	HVO_0215	0215n				6.93		-28	GCAGTTCAAGCGCGACCGGTTCGCCGGCGTGATGCACGCCTTTATCATGTGGGGCTTCCTGACGCTCCTCA
CHR	196481	Rev	60.8733	e001	196481	0			HVO_0215	704	GEN								4.23	-27	GCGCTCGTAATCCGCCGACCGACACGCCTCGGGTGGCAAGATTTAACCCTCCGTTCTCCGGTGATTGATTA
CHR	197029	Rev	2.63667	e--1								iTSS	HVO_0216	0216n							CCCGTTTCGGCCCTCCGCGACCTCCGCTACGCGATTCCGCTCCTCGCGCTCGGCCCGGTCGTCGAGGCCGC
CHR	198650	Rev	26.2267	e111			198541	109	HVO_0218	192	TP							4.95		-28	CTTCTCGTCCATACCCGGAACGTGGCACGCCCAGCGTCTTTAATGATGCTGACCGACTAACCGGAGAGCCG
CHR	198709	Fwd	8.98	e111	198709	0			HVO_0219	201	GEN							5.08		-30	CGGCGCTCGGGCGGCTCTCCGGTTAGTCGGTCAGCATCATTAAAGACGCTGGGCGTGCCACGTTCCGGGTA
CHR	199367	Fwd	125.85	e011	199368	1			HVO_0220	702	RRR							6.57		-28	ACCGACGTGTCGCTGTAACGGTCGGCCGAACGACGAAGGTTCTTAACCGATTGGAGACATACCCCTGTGCG
CHR	199530	Fwd	16.15	e1-0								iTSS	HVO_0220	0220n1							GCAGTACCCGAAGGAAAAGCGGTCGCTGCACATCGATTACGACGACCTCTATCGGTTCGATTCGGAACTCG
CHR	199734	Fwd	14.67	e--1								iTSS	HVO_0220	0220n2				7.44		-28	TATCCGGAACCTCAGGGTCAACGACGACCACATCGGGACGCTCATCTCGGTGCAGGGCATCGTCCGGAAGG
CHR	200658	Rev	7.96333	e--1								aTSS	HVO_0220	0220n3							ATCTGCTCGCCGATGGGTTCGTACTGGTCGAAGCGGCCGTACTTCGGGTTCGCCGCGCCGAGGAGCGAACA
CHR	201572	Fwd	40.4767	e-10	201577	5			HVO_0221	100	CHY										CGTCAGCGACTCGGCTTCGATTCCGCGCGGAACCGACGAACTTAGTGGAGCGTGCGCTGAGGGGACAGACG
CHR	205993	Fwd	41.96	e010	205994	1			HVO_0227	173	CHY							6		-28	CGTTACGCTTGGATATCAGTACTGATACTATCTGAGAACACTTTTACCCGATAGGCGCGGAGCACCGAGCG
CHR	208762	Rev	13.1033	e1-1	208762	0			HVO_0230	138	GEN							5.32		-28	GCGAGACAGACGAGACGGCACGCACGGACCGGTCCGAACTTTCTTTTCCTCGTCAATCGACATCCGACGTA
CHR	209352	Rev	115.237	e111								iTSS	HVO_0231	0231n							GGCTACGAATCGGGCGTCTTCTACACGAACGCCGTCAAGTGCTTCCCTTCGGACGGCGAAGGGTCGAACCG
CHR	209917	Rev	345	e111	209917	0			HVO_0232	76	CHY							8.99		-28	CGAAATCGAACGATAACGTATCACACACTCTCTCGAAACGGTTTTGCCAGTCCCCGCATCTCGGGATAGTA
CHR	210409	Rev	6.64333	e--1								iTSS	HVO_0233	0233n				7.17		-28	CGTCGTGCTCGTCAACCCCCACGAGGACGCCGTCGCCGACTTCTTCGACGTGCCCGTCGACATCGTCGACG
CHR	210823	Rev	4.8	e--1	210823	0			HVO_0233	283	CIM								4.18	-26	GGTTCGCTGACACGCGACGCGGCTGAACGCAACGAAAAGCGGTTTTACCCCCCACGAGAGACGAACGGGTA
CHR	212299	Fwd	28.9467	e101	212299	0			HVO_0236	376	RMT										AACCGCATCGCACAATCGCACCGCACAATCGCATCGCAACCGGTTTCCGCTCGCGCGGGCGACTGCGGGTA
CHR	213505	Fwd	194.553	e--1	213507	2			HVO_0237	445	GEN								3.98	-27	ACCCCGCGTAACCGACCTACGGCGTCACTTCGGCGGGTAGCTTCTTTGCCTCCCGTGTCGTTTCGGTGATA
CHR	214375	Fwd	145.79	e001								iTSS	HVO_0237	0237n					2.8	-28	CGTGACCCGCCGGGGGGACCGCGCGGAGTGGACCGGCAGGTACAACATACGGGAGGCCGACATGACGCTCG
CHR	217324	Rev	124.543	e111			217314	10	HVO_0239	456	AA							9.11		-28	ATTCTGTGGCGAGGTGCGGGGAATTGCATTAAGCGGAAATGTCTTTATAGTGCGGGTGTTCGAATCGCGTG
CHR	217789	Fwd	83.0167	e111								iTSS	HVO_0240	0240n							GGTGTACGAGGTCACCGGCGACTACGACATCATCGCCATCGGCAAGTTCCGCGACACCGACGGCATGAACA
CHR	218058	Rev	109.717	e-01	218057	1			HVO_0241	50	GEN							6.27		-28	ACAGACAATTTGATGATAACTATACACACACGCCAGTAGATTTATTCCGCCCAGTCGACGAACACGAACCG
CHR	218796	Rev	5.39	e1-1								iTSS	HVO_0242	0242n							GCGACGAGACCGACGTGACGATGAGCATCGCCGGCAACACCGCCATCAACGACACGGCCGAACACAACCTC
CHR	219536	Fwd	36.7333	e111	219536	0			HVO_0243	341	AA							6.21		-28	TATTGCGGCCGCGGCCGAGAACGCCCCGCGGACCACCGATTATTTCTCCGTCGGCGCGGTCTCTCCGCGCA
CHR	221566	Rev	46.6267	e111	221566	0			HVO_0244	314	TP								2.12	-28	CCGTCGAGGATGGTCCGTCTCTCGATTCGCCGTCGGTAGCTCTATCCGGTCGGGGGGAGTGGCCCACGACA
CHR	221701	Fwd	77.94	e111								iTSS	HVO_0245	0245n1				4.72		-29	CGACGGGCCGACGGGCGGACCGACGCCGCAGTCGGTAGGTTTCAATCCCTCCGGTCCCTAGCCCGCGCATG
CHR	222368	Rev	579.367	e101								intergenic		0245n2					4.05	-28	GTGCTGCGTGACTAAAACGGCTGTTTGAGCTTACGGTGCGTATTTGATACCGTCACCCGTAGGAGTGAGTG
CHR	223164	Rev	36.65	e111								iTSS	HVO_0246	0246n					1.44	-28	CGAGTCGCCGGCGACGCCCTCCGACCTCGCCGCCGAAATCGACACGTCCCTCCAGAACGTCCAGTACCACC
CHR	223387	Rev	10.7167	e1-1	223386	1			HVO_0246	320	REG								3.94	-28	TATAGCAATTTCGGCGACGTGTCGTGAAAGAATACGAACACTCATGGGAAGCGGTGAGTAACGCCGATTCG
CHR	224826	Fwd	5.44333	e--1								iTSS	HVO_0248	0248n1					3.92	-27	GCTACGCCGCCGGCGGCTCGGGGGTCTCCGGGCGGAAGATGCTTTACACCGTTCTCGCGTGGATTGGCTCG
CHR	224889	Fwd	19.9467	e11-								iTSS	HVO_0248	0248n2					1.42	-30	TTGGCTCGCTCGCCCTCGCGCTCGGACTGGGCTACGGCGTCTTTACGCTCGCGTCGAGCGTACTCGGCGTG
CHR	225856	Fwd	12.1367	e111								aTSS	HVO_0250	0250n				5.81		-28	TCTCGCGGACGAGGTTTCGGATGTTGACGATGCCGATGATGTTGTCGAGGTTCCCGTCGTAGACGGGGACG
CHR	226809	Fwd	8.71333	e--1	226809	0			HVO_0251	87	MIS										TCGAACCGATGTTGCGGCGCGGATGCCCGCGAGCGAAGGGCTTAGGCGACGCTCTGCTCAACACCCGCCCA
CHR	227314	Rev	8.90667	e111								aTSS	HVO_0252	0252n					1.71	-30	AAAACAGGCGGGCGTCCACGCCGCGCTCCGCGAGGAACGACTTGTGCTCGTACGGCGACGAGATGGAGACG
CHR	227672	Fwd	25.2133	e111	227672	0			HVO_0253	199	RMT								4.59	-28	TCGACCGCATTCGCCCGCGCGGAATCGCCGTTTCGTCACGCTTTTTCGCCCGTTGCGCGTCGGTTCGTACA
CHR	228403	Fwd	5.19333	e--1								aTSS	HVO_0254	0254n							GACGCCGCCCTCATCGACCGAGTAACGACGACAGCGACCACGTTTTCACGCCGCAGCGCTCCCGATAGGTA
CHR	229170	Fwd	58.4367	e111	229170	0			HVO_0255	537	GEN								1.5	-29	AACCGGACTCGCGTCGTCTGATTCGCCGCCGTGCGTGAATTAATACGGTCGTGTCCCTTGGCTTACTGACA
CHR	231334	Rev	248.823	e010	231331	3			HVO_0257	63	CHY								3.13	-28	GGGCCGCAGGAACGAGAACCACGAGACGGCGGCGGGAAGACTTTTGCAACGAGCGGGAAACGTCTCGACTG
CHR	233299	Rev	522.64	e111								aTSS	HVO_0259s	0259An				6.18		-28	CTTTAGCAATCCAAACATCTGTTCTCAAACTAACGGTGCATTTATGCACAGTTAGTGTTATGGTAGACTCA
CHR	234074	Rev	72.9367	e01-								intergenic		0261n				6.04		-28	ATCAAAACCGAAATTACCCTCTACCTCAAAGGTAGCAAAGTAGAACTTTGTTCCAGACATTTCCTATCCTA
CHR	234302	Fwd	63.6533	e--1								iTSS	HVO_0262	0262n1					4.62	-30	TCTGAAGAATGGTACTTTGGACGGCCTGAGTTCGATGCCAACATGATTTATGGGAAATTTGGAAAAGTGTA
CHR	234329	Fwd	155.947	e-01								iTSS	HVO_0262	0262n2							GAGTTCGATGCCAACATGATTTATGGGAAATTTGGAAAAGTGTATGCAGATGAACCATTAACCTACGATGA
CHR	234608	Fwd	45.52	e-1-								iTSS	HVO_0262	0262n3							GGTGTTGAGACAGTAATTCAAAACTATCCTGTTCACAAAATCCATGCAGAATTAGTCCCATCTAACCCGTC
CHR	236253	Fwd	165.907	e01-								aTSS	HVO_0263	0263n				10.29		-28	GTGAGAGAGCAACTTCCTCGTCAAGAGAGTTGACGAGGAAGTTAAGGAGCTGGTCCTCGTGGATTTCATCG
CHR	236276	Rev	161.45	e10-	236276	0			HVO_0263	388	ISH										CCACGGTTGACCATAATTAGTCTCAGTACATCACAAAGCCGGTTAGTTGAGACGTCTGCTTGCTGAAGATG
CHR	236528	Fwd	44.7833	e01-								iTSS	HVO_0264	0264n1					3.96	-27	TCAACCGGATGGGATGTCTAGTTTTGTAGCTGCAGCAACTGGTATATCTTCATCCCTCATTGCAGTTGTCC
CHR	236567	Rev	46.14	e011								aTSS	HVO_0264	0264n2				8.29		-28	GCGACGGTATATTCAAACACGAACATAATTCTATCATAAATATCTTGTTCCCGTAGAAAGGATAGGAACTG
CHR	236767	Fwd	142.25	e011								iTSS	HVO_0264	0264n3							ACATGTTTTGGATATTTGTATTCTTCTTCATCTATCTACTTCTAAGTACTATGCAAATCGTATCTACTATA
CHR	236992	Rev	9.62667	e--1								iTSS	HVO_0264A	0264An							TTGATCGAGAGCTACGAAAATCTCGAGGAAGTTCGCGATGCGTATCCGCCTCAGACTGTGAAGGACTGTTG
CHR	237481	Fwd	156.457	e111	237481	0			HVO_0265	86	CHY							7.08		-28	TTGAGAAGGGGTCTGCACGGGGCTACTCGCCGTCCGAACGCTTATCCTCTGAGACCGATTCGAATTCAGTA
CHR	242229	Fwd	14.6833	e-11								iTSS	HVO_0273	0273n					4.04	-28	ACAGGAACTCAGACAGGCGCTTCCGGCGATTGTGAGAAGAGTGAAGCACGATACGATGGAGGCACAGAACG
CHR	242644	Rev	13.11	e--1								aTSS	HVO_0274	0274n					4.69	-28	CCGACCGGACGACGTGCCGACCGACGTGGGTCTCGAGAAAGTTCTTGCCGCGCTCCTCATAGATCGAGCAG
CHR	243798	Fwd	17.1933	e--1			243876	78	HVO_0275	450	ISH										TCCGACCCCGACCGAACCGGGATTTTCGACGAAAGTCGCGTTTCGAGCGTCGAATCGAGGCGGTGGGTCCA
CHR	243903	Rev	51.0167	e01-								aTSS	HVO_0275	0275n1				7.41		-28	GTTGCGCGAGCGCGCTCGCGCAACTCATCAGAGGGAAACGCTCTTTGAATCCGGTCAACTATGACCGAATC
CHR	244838	Fwd	6.04	e1-1								iTSS	HVO_0275	0275n2					1.67	-26	ATCTGGCGAGAGAGGACTACAGCGCGCCCGATATCGCGCAGCTCTATCGGGCGCGCTGGGAGGTCGAACTG
CHR	244962	Fwd	22.6933	e1-1								iTSS	HVO_0275	0275n3							CGGCTACATCATCGAGGCGCTGATCATCATGGCCGCAATTTCGTTGATGATGAGTCGTGTAATCGTGGATG
CHR	245253	Fwd	20.0067	e--1			245331	78	HVO_0276	450	ISH										ACGTGAGCAGGTTGAACGAGGTGAGTTCGGCTTTGATCGCTACTAAACTAGAACGCATGGCGGTGGGTCCA
CHR	245269	Rev	22.5	e11-								intergenic		0275n4					4.22	-29	ACTTCCCACCGGGTTTCTCAATCAGGTAGTTGCGACGATATCAAATCAACAGACAGCAACTGGATTCTTCG
CHR	245358	Rev	51.0167	e01-								aTSS	HVO_0276	0276n				7.41		-28	GTTGCGCGAGCGCGCTCGCGCAACTCATCAGAGGGAAACGCTCTTTGAATCCGGTCAACTATGACCGAATC
CHR	248318	Rev	97.22	e11-								aTSS	HVO_0278	0278n1					3.81	-27	GTTACGTCCAAGTACTCCGCGAGAGTATCGTAGACGTGGTAGTAATTGCTGGTCGCCTCGATTACTGCACG
CHR	248353	Rev	18.9933	e-10								aTSS	HVO_0278	0278n2					1.83	-31	GAGCGATGAGCGTCAGTTTGCCTGGATGAGCGACGGTTACGTCCAAGTACTCCGCGAGAGTATCGTAGACG
CHR	248719	Rev	14.7533	e0-1								aTSS	HVO_0278	0278n3					2.93	-27	TCAGAGACCCAGCGCGCTCCTCAATCGCCGCTTCCAACTGAGTCATCTGCTCGGTTAGCGTCTCGACCACG
CHR	248863	Rev	81.7733	e111								aTSS	HVO_0278	0278n4					3.91	-27	ACTCGCGGATCGTCGGGTTCAGTCCCATGTAACTCACGACCTCTTTGTGGCCGTCGAACCGATCGATCTCA
CHR	249004	Rev	41.5167	e110								aTSS	HVO_0278	0278n5							GACGATTCAACCGGTGGAAGAACGTGCTTAGATACGCGTCTTTACACGTGTACACGGCTGAGTACGCACTC
CHR	249139	Fwd	11.9633	e1-1								iTSS	HVO_0278	0278n6							ATCGTCGAATGAACTCGAAAAAAGCGATCGTCGCGACGGCACGAAAACTGCTCGTCTCGATGTACTACATG
CHR	252100	Rev	319.423	e111											HVO_0281	252098	2	6.8		-28	CGTACTTCTTCCCCCTGACCTGACGGGGCGGAACGAAACCCTTTACTCCGCGACGGGGAGAGTCGTATGTG
CHR	254004	Rev	33.6367	e001	254004	0			HVO_0282	618	TP							5.38		-28	GACGACGCGCTCGGCCGAGAGACAGTCCGAATCCCGCACGCTTTTTGGCCGCCGACGCGTCGGTGACCGCG
CHR	255833	Rev	46.33	e100								iTSS	HVO_0283	0283n							CCGCATCTCGCAGCAGACGCCGAAGGACGGCCGCGACGAGCTAAAGGAGATGCTCGACGGATACCAACTCG
CHR	256130	Rev	201.66	e111	256130	0			HVO_0283	684	MIS								2.29	-28	TGCGGGTCGCTATCGAATCTGAGCGGTCGCAGGCGAATCGCTGAAATACCACGTCGCCGTAGCAGGGACCG
CHR	256670	Rev	13.43	e-01	256670	0			HVO_0284	129	GEN										GAGGGGCCTTAAGCAGTCAGGGCGGAGAGACGGGGAAATGCTTACGCGGGCGGGCAATCGACGGGGAGGTA
CHR	256758	Fwd	181.057	e011	256758	0			HVO_0285	390	GEN										CCGCCCGCGTAAGCATTTCCCCGTCTCTCCGCCCTGACTGCTTAAGGCCCCTCCGCGGCTACCTACGGGTA
CHR	259378	Rev	807.203	e-01											HVO_0288	259370	8	5.3		-28	CCTCTGTTACGTACTGTCATTCCGGGACCGTAGCGTAACGTATTTTAGTCGTAGCGGATTAGGAAGGGTTG
CHR	260322	Fwd	7.62333	e--1								aTSS	HVO_0290	0290n							CGCGCAGCTTTTCGAGTTCGTGTTTGGGGACGACCTGCACCTGACCGTCGTGGGCAACTAACGTGTCCACG
CHR	261300	Rev	42.15	e010								iTSS	HVO_0292	0292n1				6.48		-28	ATGGCCATGGACGCCCTCGACACCACCATCGTCGAAGAGGAGATGCGCGGTGACCTCGTGGGGTACTACTA
CHR	261656	Fwd	4.91333	e--1								aTSS	HVO_0292	0292n2				5.79		-28	TGTCCACGAGCGCGCCCTCGACGCTGGTCGAGTCGTCGCCGACTTCGATCTCCTCGTCGAGTTCGGTGATG
CHR	261706	Rev	25.2167	e0-1								iTSS	HVO_0292	0292n3							CGTCTCGTTCACCACGTCCGAACTCCCCGAACTCGAAGAAGGGAAGTCGTACGCGCTCGGCAACGTCGTCA
CHR	262164	Rev	62.74	e111			262126	38	HVO_0292	311	RRR							6.23		-28	TCGGCCGCGACGTTCACTTTCACTGCGCCGTTTGCAACTTTTTATATGAGTACGCATCCAAGGTCAGTATG
CHR	265732	Rev	48.4067	e0-1	265732	0			HVO_0297	164	GEN							4.9		-28	GTCGGCGGCGGCGTCCCGTGGACAGTCAGCCTGCTGTATCTTTTTTCACCCCCGAGACCTACCCCGAGGTA
CHR	266291	Rev	128.673	e111	266291	0			HVO_0298	160	GEN								3.76	-28	GAGGGAAAGCGTTTCGGCGGGCGACGGGCTACCCGCAAGCGTTTAGAGTGCCCCTAGTGTACCTCCCCGCA
CHR	266382	Fwd	40.0733	e111	266382	0			HVO_0299	228	CHY								3.79	-27	CACTCTAAACGCTTGCGGGTAGCCCGTCGCCCGCCGAAACGCTTTCCCTCGCGCGCTCGAACCCCGCGGTA
CHR	267870	Fwd	35.3967	e111								aTSS	HVO_0300	0300n				6.73		-28	TTCCCGTATAGAGGTGGATGTGGTGGTCCTCACCGAACTCGTCTTTGAGAAGCGAGATGTATCGGCAGGTC
CHR	268118	Rev	395.503	e001			268112	6	HVO_0300	331	CHY							7.76		-28	GTACCGGCGAGCGGGAGGTGCTCCGGGCGAAGTCGGACGCCTTTTGACGATGCACCAAGTATGGATCCGTA
CHR	268220	Fwd	27.5967	e011	268220	0			HVO_0301	629	SIG							9.27		-28	CGTCCGACTTCGCCCGGAGCACCTCCCGCTCGCCGGTACGATTATTATTATCTGTGACTGACAACACGCCA
CHR	270239	Fwd	27.14	e011	270240	1			HVO_0302	377	GEN										AGACCGACGGACCGCGCCACCGCGACCGCTCCCCCGAAAGCAGATATATCCCCGTGGCATAGGAGTCAACG
CHR	272255	Rev	32.2633	e-11	272254	1			HVO_0303	280	LIP								3.96	-27	CGGCGACCGCCTCCGCGCTCGGTTTTCGGAAATCCGGTACGTACTTCCCTACCCGACCCTACGAACCGACA
CHR	272969	Rev	10.2767	e1-1								iTSS	HVO_0304	0304n					1.8	-30	GGGACGCCACCGAGGAGCCGGGCGAGCCCGCCATCGAGGCGTTCTCGTTTGACCTCGATGAGTCTCGCGTG
CHR	274338	Fwd	9.71	e11-								intergenic		0305n							ACCTCGGCTACCTCCTTGACGGTTACGAGAATTTTCATCAACGTTCACTACCGACCGGGGCGAATAAACGT
CHR	274973	Fwd	8.88	e--1								aTSS	HVO_0306	0306n							GTCGCTGACGGCGTAGCCCGGCGGCGTCTGAATCGTGAGGTTCTGATTCGACCGAAGCGACGTGAGCCACG
CHR	275555	Rev	307.11	e111	275553	2			HVO_0306	392	CHY							9.32		-28	CTGTCGACGGCGTCTGACGCTGTTGAATCGATGGAAAGCGTTTTCATCGCCGGACGAAACGGATTTACGTA
CHR	275564	Fwd	24.0033	e111			275700	136	HVO_0307	463	CHY										TGGGACTGCGACGCCGGCGACGATGGTGAGGAGGGCAACGATGAGGACGGCGCTCCGCATATACGTAAATC
CHR	275699	Fwd	3.9	e--1	275700	1			HVO_0307	463	CHY										CCCCCGTCGTCGCCGTCGTCGACAGCAGCAAGAGGGTCATTTTAGTACTGCCCCCGTGTACCCTCACGGCG
CHR	278304	Rev	140.493	e001	278303	1			HVO_0309	207	COM							7.33		-28	TTACCCCCTCGAACGCCGACCGGCGCGGCGAATCCGCACCGTTATCATCGGCGAGTTCTAATCCCGGCGCG
CHR	280061	Fwd	60.8833	e111								iTSS	HVO_0311	0311n1					4.56	-28	CATCGGCTTTTTCCTCTACTCGAAGTTCGAGGACGGTGCGCTCAAGAGCATGGGTGGCGTCACCCTCGCCG
CHR	280373	Fwd	28.65	e1-1								iTSS	HVO_0311	0311n2					2.53	-28	GAAGGAGGCGGTCCTCGAAAGCGGTTCGTGGATCCTCATGTTGAACGGCCTGTGGATCTGGATCTTCAGCG
CHR	281117	Fwd	57.0467	e011			281153	36	HVO_0312	85	EM							7.67		-28	CCGCCGCCGTAGGCAGACCGCTCCAGACGTTTTGGGAACCTTTATGATACGGCTAACAGCACATACGGACG
CHR	282583	Rev	17.6267	e1-1								aTSS	HVO_0314	0314n1							TTTCGGAAGTCGATTTCGGCTTCGAGGAACTCGCGGTACTGCTTTGCCTCTTCGCCGACGACCAGGTCGTC
CHR	282887	Rev	8.23	e1-1								aTSS	HVO_0314	0314n2							GATGTACGAGACGATTGGCGTGACAGAAAGCGGGAACACGTAACCGAGCGTGTCCGCGTACTCCAAGAGCG
CHR	284682	Rev	6.91333	e0-1								aTSS	HVO_0316	0316n					4.62	-27	CAGTCGTCCTCGACGTTCTCGACGAACCACGGGTCGAGCTGCTCTTGGTAGAGCGAGTACGACTCGTTCCA
CHR	286161	Fwd	52.3933	e101								iTSS	HVO_0317	0317n					2.01	-27	CGCACCCGATTCCGGACCTGACCGGCTACATCACCGAGGGTCAGATCTACATCGACCGCGACCTCAACTCG
CHR	289349	Fwd	12.27	e--1								iTSS	HVO_0319	0319n1							TCCATCATCCTCGCGGCGGAAGTCGAAACGGCCATGAAGAAGATGCTCGAGGAAATCGAGACGACGAAGCG
CHR	289501	Fwd	5.47333	e--1								iTSS	HVO_0319	0319n2				5.53		-28	GGAGCGCGAGGAGATTTTCCGCCTGAAGAAAATCAAGGCGAAGAAGGAAGAAGAAGAAAAAGAAGAACGCG
CHR	290347	Fwd	6.52333	e--1								aTSS	HVO_0321	0321n1							GGGTGGGCGTGTCGTGACGGTGGTCGACGAGCTCGTACTCCTCTTGGCCGCCACAGTCGTAGACGGCGATG
CHR	291150	Rev	37.2567	e001								iTSS	HVO_0321	0321n2				7.67		-28	CATCCCCGAAGACAAGCAGATTTCCGACGTGGTCGAACACGTCATCACGGAGCACAGCGAAGCGTCTAACA
CHR	291334	Rev	241.43	e-01	291333	1			HVO_0321	414	TL							6.38		-28	TCGTGCGTCGAGATACCGCGGCACGTGCCCAGTCAAAGGTTACTTAGCCGCTGGAGGGACTAGGTGGAGTG
CHR	291424	Rev	34.6233	e011			291333	91	HVO_0321	414	TL							5.72		-28	GCCATAATTCCAACGTCGAAGTCCACCCGTGACAGCAACATAAATGTTCTCCGACCGCGCTCGTCTCCGCA
CHR	291481	Fwd	46.7567	e-11			291490	9	HVO_0322	574	GEN							8.8		-28	GTCCGAACCGACGTGCGGAGACGAGCGCGGTCGGAGAACATTTATGTTGCTGTCACGGGTGGACTTCGACG
CHR	293254	Fwd	293.15	e100	293254	0			HVO_0323	45	CHY								1.84	-26	AAAGGGGTTCCTCAGTCGCTTCCTCGGCTAAACGGGAAGGTCTTTTACTCGCGTCTGCGGAATGCCCTCTA
CHR	295200	Rev	25.67	e011	295200	0			HVO_0324	587	TL								3.37	-27	GGTCGGCGCGGGGCGCGGTCGCCCGGACGGTTCGGAAAGGCCTTTAGCCGCCTATCGAGAATCCGCGTACA
CHR	295378	Fwd	26.5367	e110			295413	35	HVO_0325	50	GEN										AGCGCCACCCGCGTGGATACCTTACTAGTAAGGTAGTAGTGGTATATCGCCCGGGGACGACGTTCAAACCA
CHR	295929	Fwd	1699.37	e110											HVO_0325s	295941	12		1.41	-30	CGGACCCATTCCTTCTCACCGCGGTAGACTGACCGACGGACTTACCCGTTCCCGATTGGAACTGTCGCGTA
CHR	296025	Fwd	164.037	e10-	296025	0			HVO_0326	237	COM							6.13		-28	CAACTTTCTCATTTTTGGAACGCATTCCACTTACGATACGCTTATGGGGCGCGCGTTCGAAGCCGGGAGTA
CHR	298345	Rev	2.78667	e--1	298345	0			HVO_0328	296	GEN								1.57	-27	CCCTCTAAAATCATGACGACCCGACTACCACGCCCCCGGCGGTTTTGTCCGCGGGCCGCCATGACGGGGTA
CHR	299067	Fwd	34.2667	e111								iTSS	HVO_0329	0329n							ACAAGGAGGGCAACGTCGCAGAGGGTCCCGGCGAGAACATCTTCATGGTCCGCGACGGGAAAATCTACACG
CHR	299625	Rev	9.27333	e--1								iTSS	HVO_0330	0330n1							GTTCAAGACCGGGAAGACGACCAAAGACGGCAAGGTGATCGTCTTCATGCCGACCGCGCCGAACATCACCA
CHR	299899	Rev	31.7733	e010								iTSS	HVO_0330	0330n2				5.01		-28	CCACCGACGGGACGGTGACGCCGCTTTCGGAGGCGCTCGGATTTATCATCTCCATCATCATCTTCCTGCTG
CHR	299936	Fwd	49.2867	e111								aTSS	HVO_0330	0330n3					4.13	-28	CGTCCGCATCAGGTAGCCGACCGAGAGGACTAACAGCAGGAAGATGATGATGGAGATGATAAATCCGAGCG
CHR	301015	Rev	28.51	e011	301015	0			HVO_0331	279	AA								2.15	-28	GACGGTGTCGTTCGATTTCGCGTCCGAATCGATGATAACCCTCAATAGCTGACGGTCGCAATCGTTTATTA
CHR	301043	Fwd	53.59	e010			301142	99	HVO_0332	180	LIP							6.86		-27	CGGACTCTCCCGCGACGAACCTGCTCGCGATGGGCGGAATCATAATAAACGATTGCGACCGTCAGCTATTG
CHR	301751	Fwd	178.597	e--1	301751	0			HVO_0333	176	NUM								3.66	-31	GTAATCCACGCGGTTACCGCTCACCCGAACCGTCCCGCTTAAGCGCCTCCCTGAACCCTCTCGAAACAAGA
CHR	302356	Fwd	23.2767	e011	302356	0			HVO_0334	237	NUM							10.7		-29	CGCTTGTGACTAATTCACTCGGAATCGGTAATCGAAGTATTCATTTTTGTGCAAGTACGAAGCCGGAGGCA
CHR	303249	Fwd	9.57333	e110			303256	7	HVO_0335	470	TP										TCACGTTCGTGGATAATTCTGCCCGGGAGGATGGTAATGCTTATGTGTGGAATCCGGGGTATGCTTAGTCG
CHR	303871	Fwd	10.0233	e1-1								iTSS	HVO_0335	0335n							CGTCACGATGGGGAACCTCGCGTCGAACCCCATCGCCATCGTCTCCATCGTCGGCCTGTTCTTCACGTTCG
CHR	305161	Rev	15.35	e--1								aTSS	HVO_0336	0336n				8.67		-28	CGCATGTTGGCGATGAGGAGTTCGTCCTCGCCGAAGGCGTCAACGTCGTGGGTGTCCTCCATGTCGAAGCG
CHR	306249	Fwd	156.15	e111	306250	1			HVO_0337	84	MIS								3.9	-28	CTTTCGGGGTCGTGTGGTTCGATTGCAGAAGACCATGGCACTCATTAGCCGCGGCTCCATACCCCAGGCTG
CHR	307022	Rev	9.24667	e--1								iTSS	HVO_0338	0338n1							AACTCGGCGTCTCGCGGCGCACCGTCTCGAAGTACGAAAACGGCATGAACGCGAGCATCGAAGTGGCGATT
CHR	307421	Fwd	87.03	e111								aTSS	HVO_0338	0338n2					4.34	-28	GCATCTCCGAGCCGGTGACGCCGTCGAACGCGTCGATGTTCCCAAGTATCTTGAGGAGCAACAGGTCCTCG
CHR	307537	Rev	348.577	e110	307537	0			HVO_0338	324	REG								4.26	-28	GGGAGATACCACGGCGAGGGCGGCGGTATCGGGGAAAACGCTTTATGGGCCGAATCGCTTATTGCCCCCTA
CHR	307680	Fwd	11.5233	e--1	307680	0			HVO_0339	422	RMT										CTCGATGCCGCATTTATATAGCCATAATCGACCCGAAAGGCGTTACTGCGCCGTCCGGCAATCTCCGCGTA
CHR	308751	Rev	1.51	e--1								aTSS	HVO_0339	0339n							TTGCCGGGTGCGTCGGTCCCGCAGTCGCGGCACCGGTAGCCCTGATTCCGTCCCGCGCTTTTCATCGTCCG
CHR	310564	Fwd	27.11	e010								iTSS	HVO_0342	0342n							ACGCCGCGGGCGGTTTCCGAGCCTGGCAGTTCCGAAACCATAGAGTAGCCTCCCCGGAGTACTGCCGTATG
CHR	311466	Rev	85.1967	e111								intergenic		0343n1					3.94	-28	GGCACGGTTCAAATCCCGCCTCGGGCGCTTTTCCGAACGTTACAAGCCAAGCGACGCGTCTTGTCGCGTCG
CHR	311838	Rev	250.227	e-11											HVO_0345	311827	11	7.23		-28	ATCGCGGTACCGCGGGCCAAGGGCAGCCCAGATGGTAAGTCTTATCTATAAACCTCGGCTACGGATGAGTG
CHR	311900	Rev	13.1633	e11-								intergenic		0343n2					1.92	-26	AGATGCGCGAATCGTCACACGTTGGCATGGGGTGTCACGATATAAATGTCTTCGGGGCGAGAATCGCGGTA
CHR	311901	Fwd	91.88	e011			312095	194	HVO_0346	75	TC							6.03		-30	CCGTCTGCACTCATCCGTAGCCGAGGTTTATAGATAAGACTTACCATCTGGGCTGCCCTTGGCCCGCGGTA
CHR	312591	Rev	10.64	e-11								aTSS	HVO_0347	0347n					3.39	-27	CGACCTCCTCTTCTTCCTCGCCGCCGCGGACGATGGACATCTCCATGAACACGGGGGCGGAGTAGGTGATG
CHR	314339	Rev	18.32	e11-								aTSS	HVO_0348	0348n1					1.8	-29	CGGATGCGGTAGTTCGCCGCGGGCAGCCCCAGCGACTGCTTCATCATCCCTGCCCCCATCGTAATGCGGGG
CHR	314555	Fwd	11	e--1								iTSS	HVO_0348	0348n2				6.82		-28	GTTCGACGAGCGACCCGCGGCCCAGAACTTCGTCGTGGCCGTCATGTCCTACGAGGGCTTCAACATCGAGG
CHR	314573	Fwd	18.0133	e--1								iTSS	HVO_0348	0348n3				7.53		-28	GGCCCAGAACTTCGTCGTGGCCGTCATGTCCTACGAGGGCTTCAACATCGAGGACGCGCTCGTCATGAACA
CHR	315269	Fwd	47.69	e111								iTSS	HVO_0348	0348n4					4.22	-28	AAACGAAGAGGAACTCCGCTCGGCGCTCGAAGAGCGCGGCTTCATGTCCTCCGGCAAGGAGGTCATGTACT
CHR	316490	Fwd	105.767	e101								iTSS	HVO_0349	0349n1				6.71		-28	GGCGCTCGACCTCGACCTCACCGAGGAGGACATGAACAAGCTGATGCCCTCGGACATCCGCGACTGGTTCG
CHR	317956	Fwd	13.0667	e111								iTSS	HVO_0349	0349n2							TCGACGCCGCCTACGACAAGATTCAGGAGCTCATCGAAATCTACGAGGCGGGCGAGCTCGAATCGCTGCCG
CHR	320381	Fwd	7.36333	e--1	320381	0			HVO_0352	258	TP							7.13		-28	CATCCAGTTGACGTAACGCGGCGGCCGACTCGACCACACGTTTTTGTCCCCACCGAACGGCGAGCTACGCA
CHR	321382	Fwd	1362.72	e101	321385	3			HVO_0353	142	TL							6.09		-28	ATCGCTCCTGAAGCCGTCTCGTCGGATTCGAAAAGGGAGGCTTAAGTAGCTCCATCCGGAACTGTTGTTCA
CHR	321920	Rev	16.5067	e111								aTSS	HVO_0354	0354n1					4.13	-27	TCGAGGCGTGGCGGCCCATCGTGTGGGCGATGGGCGTCGCCTTGATGTACCGGCTCATGCTGGGGTCGGTG
CHR	322248	Fwd	20.61	e--1								iTSS	HVO_0354	0354n2							CCGCGAGGAGACCGTCCGCCTCAAGTACGGCGGCATCTCGGTCCCGCAGGCCGTCGACGTCGCCCCGCAGC
CHR	324075	Rev	16.7033	e111								aTSS	HVO_0356	0356n1							AGATGCCGGTCTCCTCCATCGACGGCATGGAGACGCCCCACTTGTAGAGGGCGGACCCGAAGGCGACGGTG
CHR	324175	Fwd	12.6333	e1-0								iTSS	HVO_0356	0356n2							GTGGGGCGTCTCCATGCCGTCGATGGAGGAGACCGGCATCTCCTTCGGCGACATCATGGAACTCGAACGCG
CHR	324533	Fwd	66.6933	e111								iTSS	HVO_0356	0356n3							GGGACCGCGGGCAAGAACCGCGTCCAGTCCGTCGGTGTGTTCATGGGCGGCGAGCGCGAGGAACTCGACCG
CHR	325862	Fwd	115.53	e111			325966	104	HVO_0357	189	GEN								3.55	-28	CACGCTCCCGGCGTCGGCAAACCGTGTCGGCTGCGAAGGCTTATACCGCGTGGCCGAATCACGGGTAGATA
CHR	327607	Rev	45.39	e011								intergenic		0358n				6.59		-28	ATTGGTGTGGTCACGCGCTAAGGCGCTCTGTGGGGAATGTTTTTGCTGAAACCCCTAAAACGATTTCGATA
CHR	328089	Rev	2.70667	e111								aTSS	HVO_0359	0359n				6.02		-28	CCTTGACGTCCTTGTACTTGTCTTCGCTGTAATCGACGACGTCCATCTTGTTGACCGCGATGATGAGTTCG
CHR	329416	Rev	2.6	e--1								intergenic		0360n							GATACACTTATACCCTATGTTTTGTCCGCAGTCGGGCATGCGATAGCAACCCGTTCCGTCGGGCGATTCTG
CHR	332420	Fwd	4.97667	e--1								aTSS	HVO_0368	0368n					1.77	-31	TTTCGCGGAGGTTGCGAAGTTGCTCCTCCAGAGCGGTGATTTCACCGACTTGCGGCGTCTCGCTCGACCCG
CHR	333548	Fwd	7.74667	e--1								aTSS	HVO_0371	0371n				5.04		-28	CGGTCGGGAGCGCGCGGAAGCGGTAGGCGTAGTCGGTGCTCTTGTTGTCGGTGATGATGACGATACGGTCA
CHR	336338	Rev	2.55667	e--1								aTSS	HVO_0377	0377n					3	-29	CATGCGTACGCCTCCTGCGTCTCCGCGCGGTGCAGCACGTTCATCCGCTTGTCGAAGACGACGTACTGGTA
CHR	336930	Rev	15.25	e--1								intergenic		0378n					2.79	-31	AACTGAATGTGGTTCTCGTAACAACGCCCACAGCGGACACATTGACGACGCCCGCACTCGTAGCACGTCGG
CHR	339226	Fwd	1.07333	e--1								intergenic		0379Bn1					3.19	-28	CCGCATCTCTTATTCGAGGCCCAGCCCGCTTGCCTGTGATCTCTAAGTATTCCATCGTTCTAGTTTAGCTG
CHR	339521	Rev	6.33333	e--1								intergenic		0379Bn2				5.99		-28	AAGACGAGGATTGAACGTAGGTGTAGGATACGTGAGACAATTTAACTGGGAGCACTCAAACCGCCTGAAGA
CHR	340025	Rev	5.87	e--1								aTSS	HVO_0381	0381n							CCCTGTTCATGCTTCTGCGGGCGGTTCGTCGGTCAGTTGGAGTTCGGGCGTCTCGAACGGTGAGTCCGGTG
CHR	340498	Fwd	1.31667	e--1								iTSS	HVO_0383	0383n							CGTGAGCGCCCAGACGAACCTCGGGACGTTTACCGCCGGACTCTCGCCCGCGGAGACCGACGCCTATCTCG
CHR	341840	Fwd	1.21667	e--1								intergenic		0385n							CCAGAACCTGCCATGAGTCACAACACTACCTGCCAGCCGCACAGCCCCGTGCGATTCCCGACCGGGACCTT
CHR	342293	Fwd	14.2	e--1								aTSS	HVO_0385A	0385An1					4.33	-30	GCGAGTATCAACTGCGTCGCGAACAGATGTACGTCCCGTTTCTCATTGCCGTCCAATGCCGAGTTGATATG
CHR	342484	Rev	115.3	e111								iTSS	HVO_0385A	0385An2							CAGAAATGACAATTTTAAAATAATTCTCTGCGTACGATGAGACTATGGACGTCCCTCCAAAAGACTTCATG
CHR	342510	Rev	44.9467	e110	342510	0			HVO_0385A	81	CHY							6.35		-28	GGTAGCCTAGGCTGTGAGGTACTGTGCAGAAATGACAATTTTAAAATAATTCTCTGCGTACGATGAGACTA
CHR	342617	Fwd	23.7967	e110			342850	233	HVO_0386	124	CHY								1.97	-28	CATTTCTGCACAGTACCTCACAGCCTAGGCTACCGCTGTTTTTGTGACGCTTCCCACCGTGGTGAATACTG
CHR	342828	Fwd	4.72667	e--1			342850	22	HVO_0386	124	CHY										GCGCTCGGAAACATCGTTCACTTCCGCCGAACCCGACACTTTCACCCCGCTCATGGCGGACCCTCTTACCG
CHR	342850	Fwd	17.6133	e--1	342850	0			HVO_0386	124	CHY								2.14	-28	TCCGCCGAACCCGACACTTTCACCCCGCTCATGGCGGACCCTCTTACCGTCTCGCTCCGAGGGCGTCGGTA
CHR	343683	Fwd	35.03	e010								intergenic		0387n							CCGTCACTCCGCGCCCGTCTCGCCAGTCGCGGCCGGTGGATTCTCGTCGGCCAAAAACAAGTGGTCGAACG
CHR	344210	Rev	15.5233	e101								iTSS	HVO_0388	0388n					3.87	-29	GAGTGCATGCTGAAGGCGAACAAGGCCGTCACGCACGAACTCATGTGGAACCGCGGCGTCGAGGCGATGTA
CHR	345018	Rev	100.98	e111	345018	0			HVO_0388	439	GEN							6.3		-28	TGATATCGATTCTCGTACGTCGCAGCTCGTGCCCGACACTCATTTCTCCCTGCCCCGTCTAGTCGGGGCTA
CHR	345441	Rev	765.83	e110	345441	0			HVO_0389	100	GEN								2.61	-28	GTTGGCGTCGGGCGCGCGTCAGACTGTAACAGGATAAACTGCTAAGTACGACTGGGTCCACTCCCCTCATA
CHR	345603	Fwd	89.0333	e111	345603	0			HVO_0390	159	GEN								2.52	-28	GCCGTGGGACATCACCGACCACTCGACGCGGAGCGGTCGATTTATCGGCCGTGAGCGTCCACGACCCGGTA
CHR	354481	Rev	14.2633	e--1	354480	1			HVO_0397	365	GEN								3.17	-27	CCCGAACCAAAAGCCGGGGGTGTCGTCCGGGAGTGGGAGGGTTTTACGCGCCGAAGGCGAAACGAGGAGTA
CHR	354945	Rev	470.95	e111	354945	0			HVO_0398	99	CHY										TACCCCCTGCCTGTCGGACGCCCGTCAGACGGGCGGTACAAGTAAACAGGAGGCGAACGATGTACCCGCTA
CHR	355049	Fwd	78.1967	e100	355050	1			HVO_0399	346	CHY							7.15		-29	ACCGCCCGTCTGACGGGCGTCCGACAGGCAGGGGGTAGCTTTTTGTTTCCGAATCCCGGAATCCTCGCGTA
CHR	356161	Fwd	905.617	e111	356161	0			HVO_0400	126	CHY										CCGCGGCACGCCCTCGCAGGCGTCGCGGAGTCGCGAAACAGGTAAACCATACCCTGTCGAAAAGGCGTCCA
CHR	356334	Rev	5.55667	e1-1								aTSS	HVO_0400	0400n1					4.45	-28	CGAGGTCGGCCGGGTCGGCCTCCTCGAAGTTGACCGCGAGTTTGTCTTTCTTGCCGCTGTACTTGACCGCG
CHR	356368	Fwd	48.3867	e11-								iTSS	HVO_0400	0400n2				5.41		-28	GCCCAAGAACCCCGTGTTCACCCGCATCGTCGCCGGCGCGGTCAAGTACAGCGGCAAGAAAGACAAACTCG
CHR	356639	Fwd	2380.47	e110			356734	95	HVO_0401	152	GEN							6.44		-28	ACACAGTCGCCCGCCGAGCGGCCGCGCTGCCAGCGAAACGCACATATCGCTCCCTCGTGACACACTCAGTG
CHR	356734	Fwd	74.4933	e111	356734	0			HVO_0401	152	GEN							6.8		-28	ATGAATTTTTACTTCGGTTCGAGTAAAAATCTCCGGCACGGTTAAGTGATACCGGGACGAACGGACTGGTA
CHR	357270	Fwd	87.96	e111	357270	0			HVO_0402	225	GEN							5.27		-28	CGGCGGCACGGTCGCCGGAACGACCGGTTTCGCAGGCAACTACATATCTTAGCGCGCCGTCAGCTCCCGCA
CHR	358031	Fwd	52.9267	e001	358032	1			HVO_0403	322	CIM								2.6	-28	GTTACATCGCCGCGAGTAAATCTACCGAAAATCCCGCTTAGTTAAGTGGTGGGCGCATCCCTATGGGAACG
CHR	358922	Fwd	27.0467	e011								iTSS	HVO_0403	0403n							TGTTGGAGCCCATCCGCGAACAGATGAGCGAGATGGTCATGTCGAACATCCCCGAGATTCAACTGACGACG
CHR	359471	Fwd	13.3333	e1-1								iTSS	HVO_0405	0405n1					4.67	-28	CCCGGGCCTCCGTCCGATTTTTCCCCTCGGCACCCGCAGATTCATCGTGGACCGCCGCCAGTTCCTCCGCA
CHR	361088	Fwd	254.45	e001								iTSS	HVO_0405	0405n2				5.56		-29	CTTTCTCTCGCCGGCCGGCGCGTCGGGAGAACCGTTTCATTCTAATCCGTGGGGTTCGAAGCATCGGAGTA
CHR	361841	Rev	8.39667	e1-1								iTSS	HVO_0406	0406n1					2.8	-27	GCTGGTGGTACCCGACGGTGTACCGCGACGCCGACGGCGGTGTCAAGGGGACCTACGTCAACATCTGCACG
CHR	362857	Fwd	1.05	e--1								aTSS	HVO_0406	0406n2							GTCGGCGCGGGGTCGTCCCACGCGAAGGTGTCGATGCCGAGGTCCGAGAGGCGCTCGGTGGCCGTTGCGAC
CHR	363423	Rev	6.84667	e-11	363423	0			HVO_0407	124	CHY										AGGGTCGACAGTCGGATGGCTGGCGACCGGCGACCGTACGACGTTAATGCCTCCGCTCCGAAGGGAGGGTA
CHR	364946	Rev	8.59	e111								iTSS	HVO_0409	0409n				5.29		-28	ACCTCGAACGCGCCCTCGCGGCCGACGACCGCTTCGACGGCCACATCGTGCAGGGCCACGTCGACGGGACG
CHR	365260	Rev	40.4633	e111	365260	0			HVO_0409	203	COM										AAAGAGTCACGAAAACGTGATGAAGAACGGAAACGATAGGCATTAACTGCACCCGACCGAAGCCGCGGGTA
CHR	365282	Rev	11.09	e111			365260	22	HVO_0409	203	COM							7.06		-28	TGACGGTAAAATTGTATGGGCGAAAGAGTCACGAAAACGTGATGAAGAACGGAAACGATAGGCATTAACTG
CHR	365370	Fwd	39.7233	e110	365370	0			HVO_0410A	198	GEN								4.5	-28	TCCGTTCTTCATCACGTTTTCGTGACTCTTTCGCCCATACAATTTTACCGTCATCGTCCGGAGAGTCGGTA
CHR	365559	Fwd	6.81	e111								iTSS	HVO_0410A	0410An				6.26		-28	CCCGGTCGTCCGTGAAGTGACGCCCTTCCTCGCCGGGGCGCTCAACTACTCCGGCGACATCGTCTTCATCT
CHR	367695	Rev	12.13	e111	367695	0			HVO_0412	581	TP								2.86	-27	CAAGCGACCCGTCGCCGCGGCCGACAGTCGCGCGGGGTAGCATTAAGCCGCCGCCGAGTCGACTGCCCGCA
CHR	370090	Fwd	9.73	e111								aTSS	HVO_0415	0415n					3.64	-28	ACATCTGGTAGCGCGCGCGGAACAGCACCATCACGGTGCCCTCGTCTTTCTCGACGGTGTAGCGGACGTTC
CHR	371092	Rev	160.093	e100	371091	1			HVO_0415	616	RRR								4.22	-28	GACTGCTCCGGGCGCGTTCGCCCTCGTCAGAAGCACGTCGCTTATCACCGATAAGGCCGTGAACGTGCACA
CHR	371428	Rev	283.54	e100	371426	2			HVO_0416	58	GEN							4.83		-28	GCAGTCGCCCGGTTTTCGACGACTCGGAGTTGTCGTAGGAACTAAATAGAGGCATGACATATCATACCATG
CHR	373028	Rev	27.3633	e-10	373026	2			HVO_0417	502	MIS							4.94		-28	CGAATGAACAACAACGGACTATAATTCGCATCTCCTTCATTTTATTACGGTTCCGGACCGACCTGATATCA
CHR	373052	Rev	9.57	e1--			373026	26	HVO_0417	502	MIS								4.47	-27	TGAGGTTTCACATCTGATAGCACCCGAATGAACAACAACGGACTATAATTCGCATCTCCTTCATTTTATTA
CHR	373163	Fwd	33.0167	e010								intergenic		0417n							CATTCGGGTGCTATCAGATGTGAAACCTCAAACCCATGGTGAATAGATAGTATGCCGACTTCGTTCAATCG
CHR	373232	Rev	35.7767	e-1-								iTSS	HVO_0418	0418n1				7.48		-28	ACAGTTAGCCGTGGACTCAGACCACCATATTTCGACCGAGTTATTACGGTATCATAATGAGGAAATTGTTG
CHR	373301	Fwd	21.78	e111								aTSS	HVO_0418	0418n2							CCAACAATTTCCTCATTATGATACCGTAATAACTCGGTCGAAATATGGTGGTCTGAGTCCACGGCTAACTG
CHR	373554	Fwd	27.2867	e111								aTSS	HVO_0418	0418n3					4.29	-28	TACCGTCGTTCCGAAGTAACGTGGTTCCACACACCTGGCACTTATCGTCGTAGAGACGTTTCAACTCGTTG
CHR	373828	Fwd	55.15	e011								aTSS	HVO_0418	0418n4					3.07	-29	CTCTCGTTTTCGGAAGGGCCCTCCCGTTCGGTCGCCAACGTATAGGCAGTCACAGAGCAACTTGTAGAACC
CHR	373997	Rev	24.5967	e010								iTSS	HVO_0418	0418n5					3.54	-28	GACAGGGGTGAGTAAACAACTCGTCGACTATGCACTAGACTATTGTGAATCGACAGGCATTGACTACGGTA
CHR	374059	Fwd	311.953	e011								aTSS	HVO_0418	0418n6				6.08		-29	CGAGGAATTACCGTAGTCAATGCCTGTCGATTCACAATAGTCTAGTGCATAGTCGACGAGTTGTTTACTCA
CHR	374648	Fwd	25.9	e100								aTSS	HVO_0418	0418n7					2.54	-30	TCGTAGGTCCGAATTCGGAGCGAAGGACGGACGGTGAATTTGTTGTCGGGCTGGGAGTGGATATTGAATTG
CHR	376085	Fwd	51.0933	e111	376085	0			HVO_0420	543	SIG										GCGGGGAGACCGTTATCAAATTCCGAGAATACCCGGTCCGGCTTATGACGTATACCCCACACGTCGGAGTA
CHR	377834	Fwd	304.737	e111	377834	0			HVO_0421	626	GEN										CCGACGACCCGCCGGCGGTGTCACCGCTTTTATCTACAACCTTATCCGTCACCCGCCCAAACTCACGCGCA
CHR	379294	Rev	30.7133	e111								aTSS	HVO_0421	0421n				7.12		-28	CGTCCGAGATGCGGCCGCCGCCCTTCCCGATGACGTAGGAGATGTCGTCTTCCTCGACGTAGACGACCGCC
CHR	379994	Fwd	13.02	e110								aTSS	HVO_0422	0422n							CGTCGGCGAAGTAGACGTCCTCGTCGACGATACCGATTCCCTCCAGTCGTTCGAGCGCGTAGCGAACAGTT
CHR	380213	Fwd	13.2867	e0-1			380247	34	HVO_0423	104	CHY								4.29	-28	TACCAGCATAAACCTTGTTGGCCTGCGACCGGCCGACAACGCTTTATCCGCGGGGCGGCGGGAGGAACGAA
CHR	380247	Fwd	81.7	e111	380247	0			HVO_0423	104	CHY							6.29		-28	GACAACGCTTTATCCGCGGGGCGGCGGGAGGAACGAACGCCTTTTGACGCCGGATATCGCACGGGAACACA
CHR	380494	Rev	14.1633	e--1								aTSS	HVO_0423	0423n					3.12	-28	TCGTTAGAGCTGAACACCCGAAGTCAGCAGGATGGCGAACGTGATGAACCAGAGCGCGAAGGTCATGAACA
CHR	385526	Rev	108.577	e011	385526	0			HVO_0428	149	GEN								2.51	-28	GAGTCCCGCCCGTCTCGTCTCGCTCCGTCTCGACTCACCCCTTTTCTCGTCTCGGCACCTGTATTCAGGTA
CHR	385873	Rev	117.213	e100								iTSS	HVO_0429	0429n1				6.49		-28	ATCGGGCGCGGCGAGAAGAACATCGGCATCACCGAAAAAGACCTCTACTACCGCCGCCGAAACTACGTCTT
CHR	385935	Fwd	14.8367	e111								aTSS	HVO_0429	0429n2				8.65		-28	CGAGGCCGAAGACGTAGTTTCGGCGGCGGTAGTAGAGGTCTTTTTCGGTGATGCCGATGTTCTTCTCGCCG
CHR	386129	Rev	302.947	e111	386129	0			HVO_0429	173	MIS							8.22		-28	CGACGAGCGCGTCGCGCAGCGATTTTTTCACGTCGGGATATTTATGAAGCGTCCCCGCTTAATCCCTCGCA
CHR	391491	Fwd	26.3967	e-10			391499	8	HVO_0438	89	EM										GACGGGCGCACAACCGGAGAGCCGCGGGCCCATGAGTAATCCTTATGCGCCGGGGCGGGCAAGTTGCGCCG
CHR	391882	Fwd	4990.16	e111	391882	0			HVO_0439	48	TL								3.5	-28	GCCGAGCGCGCCGCGAGCGCCGGCGGTGTGTCTCGCAAGCGTTATACGACCGGCGGCGGGACTCGTATGCA
CHR	393052	Rev	62.9533	e111	393052	0			HVO_0441	208	GEN								2.69	-28	GAGGCGATTCACGCGGCGAGGTGGCGCCGCACCCGCCCGACTTTTTCCGGTCGAGCGCGTACGCGGCGGTA
CHR	393119	Rev	40.93	e111			393052	67	HVO_0441	208	GEN							4.94		-28	AATCCCATACAGACATACGTACACGACCGAGCCCCAAAAAGGATTTGTCGCGTGAGCCCGACGTTCGGAGG
CHR	393313	Rev	10.7767	e--1								aTSS	HVO_0442	0442n					4.01	-26	TCCGCGACCCCGAGGGCGCGAGACCCCGACTTCACTCGTCTTTAATCTCCTGGAGCCGGTCGAGGAGTTCG
CHR	393985	Fwd	14.5667	e011	393985	0			HVO_0444	198	RRR								3.28	-28	GGCCCGGATGGCGGCCCGCGCCGCGCGACGCTTCGCCGGGGATTAAGCCGTCCCCGCCCTCGAACGGAGTA
CHR	394823	Rev	71.7867	e111								iTSS	HVO_0445	0445n1				8.85		-28	GTTCCGGTACACGAACATGATGGCGACGATTCTCGTCATCTTCATGCTCGTCGTCTCCGTCGAGTTCGTGA
CHR	394984	Rev	19.8533	e-01								iTSS	HVO_0445	0445n2				5.25		-28	AACAGCCCCCAGAAGGTCGTCTTCGGGATGCTCTCGCAGGTCTTTACGCCCTTCATCGCGTGGACGATGTA
CHR	395168	Rev	12.2533	e111								iTSS	HVO_0445	0445n3							CGTCATCCGCGCCATCCCGGCGCTGGTGTGGGCGCTCATCTACATCCCCCTCGGCGGCGTCTCGCCGTTCA
CHR	396073	Fwd	2.35333	e1--								aTSS	HVO_0446	0446n					4.02	-28	GGTTCGGGTTCTGGACCAGCGCGCGGGCGATGCCGACGCGCTGTTGCTGCCCGCCGCTCATCTTCCCGGCG
CHR	396668	Fwd	17.7533	e-11								aTSS	HVO_0447	0447n							TCGTCGAGGACTTCCTGAACGGGCGCGTAGTCGTCGACGGACCCTTGGTCGACCCCGGTAAACCAGAGCTG
CHR	397884	Fwd	29.57	e111	397884	0			HVO_0448	219	AA							6.61		-28	TCCGACGGCTCCCGCGCGGAGCGCTCACCCCGAGGGAAAATCACTTTGCTGTCCTCTGCGGACGTTCGGTA
CHR	398598	Fwd	23.3967	e101	398598	0			HVO_0449	268	AA								2.95	-28	CTGCGCGGAGCGATAGGCCGAATCTGCCTGCCCCGACGGTCTTTTGTCGCCGCTTCGTGAAGGGGTGCCCA
CHR	399546	Fwd	2190.32	e001	399548	2			HVO_0450	135	CHP								3.78	-31	CCCGCTCGGTCGCTCTCAACGTGTGAGTCCGAGCACATCTTTCTTTGTCGTCGGCGACGTATCCAAACGCG
CHR	400058	Fwd	2937.32	e11-			400072	14	HVO_0451	147	CHP							8.37		-28	CTCCCGAGCCGTGCGAACTGCTATCCACGTTCCGGCAACGATTATCTCCTCAGACGGCGTCTATGACCCTC
CHR	400730	Fwd	95.81	e--1	400730	0			HVO_0452	958	TL								4.15	-28	TGCCGCAATCAGACAGCCGCGCAAGTCGAGTATAGGAGTTATTTTAGGCCGGGGTACCACTACCACGGATA
CHR	401102	Rev	10.42	e1-1								aTSS	HVO_0452	0452n1					3.42	-27	TCGCGCCGCCAGTCCACCGACAGGCCGAGCGACTGCATCCCCTTTTTGTAGTGTTCCTCGATGAAGTACCG
CHR	402461	Rev	26.3733	e111								aTSS	HVO_0452	0452n2					4.42	-27	TAGAACGTCAGGTGGTTCGTGATGAGGTCGTTACCGGAGAACCGATAGTCGACGGGGTACCAGTAGTCCCA
CHR	403730	Fwd	2283.18	e100	403730	0			HVO_0453	72	CHY							4.99		-28	GACGCGGCTCTCGGGGCGACCGCTCCTCTCCGTCGCTCGATTTATCCTCTAGCCGAACTAACAGCATCGTA
CHR	405001	Rev	250.42	e111	405001	0			HVO_0454	331	AA								4.42	-28	TTCCAAGATACACTTGCAGTTGTGTTCAGAAATAGAACGAACTAAGTAGCAGGTACGGCAACGTGTCTCCA
CHR	405380	Rev	95.3867	e-01								iTSS	HVO_0455	0455n1				8.15		-28	CGCCTCCGAAGCCGCGAACCTCGTCCTCAAGATCGACGACATCATCGCGGCCGGTGACCTCTCCACCGGCG
CHR	406852	Fwd	4.76	e--1								aTSS	HVO_0455	0455n2							CGTGATGGTGACGTCGCCCATCGAGTCGACGAGCATCTTGTCCATCCCTTTGGGGCCGAGTGTGGAACGTA
CHR	406977	Rev	963.207	e010	406973	4			HVO_0455	557	CHP							9.89		-28	CGAGCGCTCGGATTCCGTCCTTCGATTCGCCGGCGAAGCCTTTTTATAGAATCACAAACAATCAAGGCCTG
CHR	407917	Rev	424.13	e110			407797	120	HVO_0457	60	CHY										CTTCTCCCTCAATCGCCGGACGGCGGGAACCGTCGGCGGAGTCTATCGCACCACGCGCCAAGAACAAGGTA
CHR	408017	Fwd	645.707	e111								iTSS	HVO_0457s	0457n					4.38	-28	CTCCGCCGACGGTTCCCGCCGTCCGGCGATTGAGGGAGAAGCTATGTGCTTCGGGTGCGAAGGGCAAGGTT
CHR	409047	Rev	103.4	e111	409047	0			HVO_0459	128	MIS								4.72	-27	GCGGGGAGGTCCCGCCGCGGACCCGGACGTTCCACCCTATTTTATCACGTCGTGGCGAAATCCACCGCGTA
CHR	410933	Fwd	16.8967	e110								aTSS	HVO_0462	0462n				5.29		-28	CCAGCCACGAGGCCCCGCCGGGGATGCCGATGCCGAACAGCTCTTTCGCGCGCGGGTCGGTGATACCGTCG
CHR	411855	Rev	936.763	e111			411793	62	HVO_0462	474	EM										CGTCTACGATGATTTTCACTTCGTGGGAAGCATGCAGGGATTGACCCTCCCCCAATACGAAGGCGTTTAAG
CHR	412998	Rev	4.92	e11-								iTSS	HVO_0464	0464n				5.21		-28	GCGGCGGCCTCATCTCCGGCATCTCGACGGCCATCAAAGAACAGTACCCCGACGCCCGCGTCATCGGCGTG
CHR	413600	Rev	39.1767	e111	413600	0			HVO_0464	403	AA							4.97		-28	GGTTGACATCACGCCCCTGATACCGATACATTCCCGAACGATTAAACGCGGACACGGGTGATTTCCGACCA
CHR	413777	Rev	42.47	e101			413600	177	HVO_0464	403	AA							5.8		-28	CGCGGTCCCCCGGTTTTACTTTCACTCCGGGTGGGGGACGTTTATATGTGCGGGGACCAGAAAGACAGTTG
CHR	416598	Rev	202.01	e011	416598	0			HVO_0466	379	CIM							7.44		-28	TGTATGGCGGTCGGTAACAGATGAGTGAAAACGATAACGCTTTTTTGATATGGTAGGCAACGGTCTGGGTA
CHR	416783	Fwd	37.37	e110			416899	116	HVO_0467	402	GEN										TCTAAAATAGTGTTCGACGATTGTCGTTATTTTCGGGGCACTTATACGGAGTCCCCCCGATGGGTCGCGCG
CHR	416899	Fwd	433.867	e-01	416899	0			HVO_0467	402	GEN								3.85	-28	GTTCTCTCGAACCACGGTGGCACCGTTACTCCTGGCAAGCCTTTTGCCGTCCCGTCGTGAAGGCGGGCGCA
CHR	418546	Fwd	10.8567	e--1	418546	0			HVO_0469	318	GEN										AGCGGCAACGCTTTCCTCGGGGCCTCAGCGGACCGAACCCCTAAAGGGAGGCGGGTCCGAGGTTGGCGGTA
CHR	419168	Rev	1.85667	e--1								aTSS	HVO_0469	0469n							GCCGTCGAGGAAGTCGTAGCCGCGGAGGACGTTGTGGACGCCGCGAACGCCCTTCTCGATGCTCTCTTCGT
CHR	422492	Rev	89.2633	e11-			422479	13	HVO_0472	91	GEN								1.8	-27	GACAGTCACGCGTCTCCGGGCGCGGGAATCACCAATCTACGATTTAGCCGCAGAGCGCGTACCTAGGTATC
CHR	422618	Fwd	927.533	e100	422618	0			HVO_0473	66	CHY							5.22		-29	AGACGCGTGACTGTCACGCCGGCCGACACGTCGACAAAAGCTAACTCCCTCGGCCGCGTCTCCCCCGCGTA
CHR	423467	Rev	17.2167	e-11								iTSS	HVO_0474	0474n1							AGGCCGTCTCCATCGCCATGCGCAGCGTCCCGCGACACGAGTTCGTCACCGACTCGCCGTATCAGAACCGC
CHR	423505	Fwd	10.65	e--1								aTSS	HVO_0474	0474n2							ATGGTCGTGTTCGTGTCGCGGTGCTCCGTCGGGCGGTTCTGATACGGCGAGTCGGTGACGAACTCGTGTCG
CHR	423604	Rev	35.7567	e011	423604	0			HVO_0474	244	MIS								1.81	-27	GCCGGGGACCGACCTCCAGGCGGTCGTTGGCGAGCGTGCGGTTGATTAGGACCGACCTCCGAGGTCGACTA
CHR	424564	Rev	8.72333	e--1	424564	0			HVO_0475	312	GEN							5.24		-28	CCCCGCCGACGCCGGACGATACCGCCTGCCCAACGCACGACCTTTTTGTTCCCGCCCCGTCGGTGCGACCA
CHR	424736	Fwd	2.56	e1--								aTSS	HVO_0476	0476n							AGGCCGACCACGCGGTCGAGGTCTGGTCGCGGGCGTAGACGCGTTTCGCGTCCTTCGCGTACACCATGTCG
CHR	426296	Fwd	1.36667	e1--								aTSS	HVO_0477	0477n					3.42	-28	GGTTCCCCGGGGGATAGCGGACGATGGTCGCGTCGTCGGTCACTTCGCCTGCGACCTCGTAGAGCGCCTCG
CHR	426415	Rev	15.5133	e111	426415	0			HVO_0477	319	GEN								4.46	-28	GACGGGGCGGAAACCGAACGCGAGGGGGCAGATGGGAACGCCTAACAGCGCCGGCGGCGCAGGTGTCCACA
CHR	426578	Fwd	14.4567	e11-			426605	27	HVO_0478	355	CIM										CGCCTCGGAGGTAATCGAGGGACTCACTCGCCCGAGAGTTAATTTCTAAGTATTAGCCATCGAAATAACTA
CHR	426605	Fwd	51.1933	e111	426605	0			HVO_0478	355	CIM							6.18		-28	TCGCCCGAGAGTTAATTTCTAAGTATTAGCCATCGAAATAACTATGGTTGGGCCCGGTCGTTTGTCTCCCA
CHR	428230	Rev	19.82	e101	428230	0			HVO_0479	162	GEN								3.12	-28	CGGCGACAGCGGGCGCTCGGGATAAAAGTGTCACCCAACGTTGATAGCCGACGCCGCCGAACCGACGCGCA
CHR	429852	Rev	48.9767	e-01	429851	1			HVO_0480	401	CIM								3.75	-28	CCCCACGAATCGCCCGCCCTTTCAGCGCGACTTACCCACCACTAAGTAACTCCTCTACGTTCTTCCACCCG
CHR	430799	Rev	76.96	e0-1								iTSS	HVO_0481	0481n1				10.63		-28	CCTCGACAACCCGAAGGTCGAACTGGTCGCCATCAACGACGTCATGGACTTCGACGACATGGCGTATCTCG
CHR	430938	Fwd	22.6067	e110								aTSS	HVO_0481	0481n2					2.79	-28	GGACGGCACGGAAGATGTTCCGGCCGATGCGGCCGAAGCCGTTGAGTGCCACCCGCACCACGTCCGATTCA
CHR	430997	Fwd	144.283	e010			431247	250	HVO_0482	120	CHP										ACGTCCGATTCATCCACGTTCTCGCCCGCGCTGAGGTAGGATTTTTCACTCATGTTCGAGTAGTATCCGTA
CHR	431193	Rev	88.4633	e011			430979	214	HVO_0481	350	CIM								4.05	-28	CGGTCGTCTCTGACCATGAGGGGCGCTATGAAATCGGAGGATAAAACGTTTCTGCCTGTGACAGTCACCTG
CHR	431247	Fwd	468.847	e111	431247	0			HVO_0482	120	CHP							9.24		-28	CCTGGCGATTCGCTGGCAGGTGACTGTCACAGGCAGAAACGTTTTATCCTCCGATTTCATAGCGCCCCTCA
CHR	431389	Fwd	12.3533	e1--								iTSS	HVO_0482	0482n1				5.74		-28	ACCGGAGGCGACGCCGGATTCGCCTCCGAGACCCACATCGACATGTACGATGAGGGCTCTACACTCCGACT
CHR	431405	Rev	33.1567	e111								aTSS	HVO_0482	0482n2				4.85		-28	GGTCACCGGCGGCGCTGATAGTCAACGTCTCACCGTCGCACTTGAGGTCGATGGCGTCTTTGTCGACGCCC
CHR	432643	Rev	35.4033	e1-1								iTSS	HVO_0484	0484n							CCATCTACTGCGACGTCGAGGACGCCGAAACGGCGAAGGACGCCTTCCGCCGCGCGTACAACAAGATGTCG
CHR	433283	Fwd	20.1	e111	433283	0			HVO_0485	215	GEN								3.65	-29	GTTCGTCGCAGCGACCGACCGTCCCGGCCGGGAGACAGTCTTATGCGCCGCCGCCGCCACGGTTCTGTCCA
CHR	433910	Fwd	12.0367	e--1								iTSS	HVO_0485	0485n							CGGTTGGCCCGACGACGACGCCGACCGCGACTTCGACGACGTGACGGCCGACCGAACCCTCGAGAACTTCG
CHR	434848	Fwd	13.5733	e11-	434848	0			HVO_0487	151	GEN								1.89	-27	CGTCGGGGGACGCTGGTGAGACGGGTCAGTTCGCTGGCAGGCTTATGGTCTCTCCGTGCGTATCTCTCCCA
CHR	435432	Fwd	1870.23	e001	435432	0			HVO_0488	132	GEN										GGTCGAGTACTTAAACCTCCCCGGATAGCGCGGGCGGAGATACCTCCCGCTGTCGGTCGTCTATCGAAGTA
CHR	436440	Fwd	539.173	e100			436448	8	HVO_0491	153	GEN							6.26		-27	ATCACCCGACTCGACTCTCTCGGGCGTGCCGAGAAGTAACAGTAATTACGTCGGCCGCGAGTCTGGTGGTA
CHR	437774	Fwd	1391.52	e111	437774	0			HVO_0493	130	GEN										ACGGGAGTATATAAACGTCCCACGCTATCGGGGTTGTCAGTTGGTCCCCGTTCGCCGGTTCTACAACAGTA
CHR	439125	Rev	35.0933	e0-1								intergenic		0494n					1.61	-29	ACTGAAGAGTGAGCTGTCCCCGTTCCCGCGAGCGACGCGAACAAAGTGAGCGGGCGAGTGAGGTTCAAATC
CHR	439314	Rev	199.32	e111											HVO_0495	439312	2	11.59		-28	AGTCGGAGTACGGCGGGTCGTAGCGCCGCAATTCGAAATGGTTTTTTCGCTCCTGCGCGTCTGTCGAATCG
CHR	441313	Rev	258.143	e111											HVO_0499	441309	4	9.35		-28	TCGGCACCGCTGACCCAGCGCCGACGGGCGATTCGAAAGTCTTTTTGATGCGGTCCGGTTTCGGGAGAGTG
CHR	442018	Rev	102.733	e001								iTSS	HVO_0500	0500n							GTAGGGTTATCTCACCCCCTCTCCAAGGGGGGCACGAACGGTGAAGGCAATGGGCACGAGACGACTCATCC
CHR	442996	Fwd	24.7	e011			443185	189	HVO_0504	165	GEN								1.52	-28	AACCACTCCGTCAACCTCGCTTCGCTCGGTTGCCGCAAGGTTCTCCCGCCCTCTCGACAGAAAATCACGCT
CHR	443083	Fwd	9.59	e--1								aTSS	HVO_0503	0502n							TTTCATGGGCTCGGGCGGATTCGAACCACCGACCTCAGCCTTGTAAAGGCCGCGTCATAACCAACTAGACC
CHR	443094	Rev	139.69	e111											HVO_0503	443091	3	8.4		-28	GCGGGTCTAAGGGTTCCGGGGACCGGTCGAAACGAAAACCGTTATGAGCGCGAACCGGTTCGATTGAGGTG
CHR	443184	Fwd	45.63	e111	443185	1			HVO_0504	165	GEN										GCGCTCATAACGGTTTTCGTTTCGACCGGTCCCCGGAACCCTTAGACCCGCGGCGACCGTCACGTCCGGCA
CHR	443457	Rev	36.6133	e111								aTSS	HVO_0504	0504n							TGGTGCCGTTTTCGGCGACGAAGACGATGTCCAGCGGGAAGTCCATGTCGCGCATCACGTAGGCGTAGGTG
CHR	446878	Fwd	7.68333	e1-1								aTSS	HVO_0508	0508n					4.27	-28	GCGGACGCGGACCGGCGAGTCGGTCTACGGATTACTCCTCTTCTTCGTCTTCGTCTTCGTCTTCGTCCGCG
CHR	447285	Rev	26.82	e111	447285	0			HVO_0508	148	CHY							5.22		-28	TCCGGAGTCGTTCGATTTCACTTTCACTTTCGGGGTCGTTTTTAAACCCCCGCGCGCCGAACGTGTGAGCA
CHR	448978	Fwd	48.3433	e010								iTSS	HVO_0511	0511n							TGCTGTATCGAGGCCGACTACGACTACGAAATCGTCTACGGTATCTCCGACAACGACCGTAAGTACTACTC
CHR	449559	Rev	13.62	e11-	449559	0			HVO_0512	141	CHY								2.41	-28	GACTGGATTTATAAATGCACCTCGTATGCTCGGAGTCAGCCACATCTCGTCAGTGGACGAAAGTGTAGCTA
CHR	449592	Rev	7.78333	e--1			449559	33	HVO_0512	141	CHY							5.55		-28	AAGTGCGGCAGTGATGTTGGCGCAGAGTCGGAAGACTGGATTTATAAATGCACCTCGTATGCTCGGAGTCA
CHR	450960	Rev	24.5233	e111	450960	0			HVO_0514	203	GEN							5.98		-28	GTATGCAAGCCCTACGCCGCGGGAGCGCGCCCTTCGCGGAATCTTTACTCGTGGACGGCGAACGGTTCGCA
CHR	451137	Rev	22.3933	e011								aTSS	HVO_0515	0515n					1.98	-28	TCGCGGCCCACGACCCGTGGCAGTCCCGACAGTAGTTGCCTTTGTACGCCCGCGTGAACAGATACTGCTCA
CHR	451617	Fwd	4.31667	e--1								iTSS	HVO_0516	0516n1							CAAGGAGGCGCACGAACGCCCGGAGACCGGGTGGGGAATGCCCTTTGCCGACCGCTTCGACGACGCCGTCA
CHR	452200	Rev	23.0467	e11-								intergenic		0516n2							CCTTCGAGAGCCTTCTGCGCTCTCGGGGCGGTACACCGTCTCTACGGAGACCTGAACAGCGAGCGATATCG
CHR	452434	Rev	2582.29	e011											HVO_0517	452423	11	7.87		-28	GCCGTGGTCCCGCGGTTCACTGGGAGTTCACATCGTAACCGTCTTAAGTAACCGTCGAGTACCGAAGGATG
CHR	452571	Fwd	7.71667	e--1	452571	0			HVO_0518	169	CHY										CGGCACGAGGCGGGCGTCGGTGTGCGTGTCGTACGCAAGGACTTTTTCGCGAGCGGGCCTAGTTTCGCACG
CHR	454274	Rev	10.4367	e--1								aTSS	HVO_0519	0519n					4.66	-28	CGCCAGCCGGCGGAGGCTTCGAGGTCCTCCTGCCAGCCCTCTTTTATCTCCGCGTCGGTGATGACGACGTA
CHR	454887	Fwd	11.97	e--1			454913	26	HVO_0520	143	CP										CGCGAAATCCGACCGCTCGGGAGCGCTCCGTGCGATAAAATACAGAAGGGGCCGCGACGGAAAGGATTATA
CHR	454913	Fwd	388.303	e111	454913	0			HVO_0520	143	CP							5.19		-28	TCCGTGCGATAAAATACAGAAGGGGCCGCGACGGAAAGGATTATACGCCGCACGGACCCGATATGTGGGTA
CHR	455317	Rev	11.79	e1-1								aTSS	HVO_0520	0520n					2.33	-28	CCGGTGTCGTGGTCGAGACACGTTTCGCTGTAGCCGAATTGCATTATTCGAAGAGGGAGAAGTAGGTCTCG
CHR	457715	Rev	9.90333	e--1	457715	0			HVO_0521	459	RMT										GGATGCCACCGCCTGACGCGGTCGCGAGCGCACCGTCACGCTTTCGCCCGCCCGCGGGAAACCAGCGGGCA
CHR	457842	Fwd	542.65	e010											HVO_0523	457852	10	7.41		-28	AGGCGGTGGCATCCGCCAGCCGTCGGTTAAAAACGAAAGCCCTATCAAGAAACATCGAATACGAGAGAGTG
CHR	457859	Fwd	1398.42	e--1								iTSS	HVO_0523	0521n							AGCCGTCGGTTAAAAACGAAAGCCCTATCAAGAAACATCGAATACGAGAGAGTGCAGACGAAAGCCGCCGT
CHR	458615	Rev	4.07667	e--1								aTSS	HVO_0526	0526n1							GTCAATCATGTTCCGGCCGAGTATCGACGCCACCGAAAGCGTCTCGTCGCTGTACTTCAGCTCCGTTTCTA
CHR	458820	Fwd	10.1	e1-1								iTSS	HVO_0526	0526n2							TCCGCCGGGCTTCACTCTCGTCTGAGTGGCGACTGGAAGCGATTATCGACCGTGACGGCGAGGAGCACCTG
CHR	459421	Rev	77.4733	e011								iTSS	HVO_0527	0527n1							TGACGCACGTGACCCCCACAGGCCAGTCGAAGGAAAGATGCTGAGTGCTTGCAGCGCCATCGAAATGCTTG
CHR	459539	Rev	151.89	e010								iTSS	HVO_0527	0527n2				7.9		-28	AGTTTCCGAAGAAAGTGTTGTGGGGTGACTTCCACAAATATATTTCTGAATCGTATGCTAATTACACGCCG
CHR	459575	Fwd	18.63	e--1								aTSS	HVO_0527	0527n3					1.95	-30	GTGTCTGCTTAACTCGAAGTTGATCGCGGATCCGCGGCGTGTAATTAGCATACGATTCAGAAATATATTTG
CHR	459600	Fwd	77.12	e010								aTSS	HVO_0527	0527n4							GCGGATCCGCGGCGTGTAATTAGCATACGATTCAGAAATATATTTGTGGAAGTCACCCCACAACACTTTCT
CHR	459623	Fwd	96.54	e--1								aTSS	HVO_0527	0527n5							CATACGATTCAGAAATATATTTGTGGAAGTCACCCCACAACACTTTCTTCGGAAACTGTGTAAATCTGGCA
CHR	459937	Rev	21.2167	e01-								iTSS	HVO_0527	0527n6							CTTAGAGCTTCTTGCTAAGCAGAAAGGCCATTCCGAATTTGAAATTCCTGATGAGGTCGAGATACCATACG
CHR	461337	Fwd	166.177	e01-								aTSS	HVO_0528	0528n				10.29		-28	GTGAGAGAGCAACTTCCTCGTCAAGAGAGTTGACGAGGAAGTTAAGGAGCTGGTCCTCGTGGATTTCATCG
CHR	461360	Rev	160.783	e10-	461360	0			HVO_0528	388	ISH										CTTCGAAGTCGTCAAACGACATTCAGTACATCACAAAGCCGGTTAGTTGAGACGTCTGCTTGCTGAAGATG
CHR	461769	Rev	71.9167	e0-1								intergenic		0529An1							ATACATAGACACTGTCGAACGCACCGTACTTAACGATTGATATTCATTTACTCGGTATAATAATAAAAATT
CHR	461783	Rev	38.9133	e011								intergenic		0529An2				4.92		-28	GGCTATCGCGTGACATACATAGACACTGTCGAACGCACCGTACTTAACGATTGATATTCATTTACTCGGTA
CHR	461802	Fwd	84.0267	e111			461838	36	HVO_0530	457	TP							9.7		-27	TCTAAACTCGGAATCACGGCGATAAGATACGTCTGGGAATTTTTATTATTATACCGAGTAAATGAATATCA
CHR	461836	Fwd	135.497	e--1	461838	2			HVO_0530	457	TP										GGGAATTTTTATTATTATACCGAGTAAATGAATATCAATCGTTAAGTACGGTGCGTTCGACAGTGTCTATG
CHR	461969	Rev	26.5233	e011								aTSS	HVO_0530	0530n							TGCTTCCCCCGTCACCGCCGTCGCCACCCGCTTCAGTAGTACTACCGTCGCCGCCCGCTTCAGTAGTACTG
CHR	463294	Fwd	11.0067	e--1								iTSS	HVO_0531	0531n1							GTCGAATTTTTACCAACGAGTGCGCCGCGCGATTACTCCCGGCTCGGCTGACGACCAGCGGGTCAACGATG
CHR	463814	Fwd	11.13	e--1								iTSS	HVO_0531	0531n2							AGCCTCTCGTTCGTCGTGACGGCGCAGTTCTGGCTGTGGATTTACAACTACAACAACGGAATCGCCAATCG
CHR	463818	Rev	9.05	e1-1								aTSS	HVO_0531	0531n3							AGATGACCGCCCAGAGGACGATGGTCTGATTACCGAGCCAGCTAATCGGGCCGACGCCGACGAGACCGATG
CHR	464012	Fwd	17.1933	e--1								iTSS	HVO_0531	0531n4							CTCCGCGCGATTCCGGACGAACACTACGAGGCGGCAAAAGTCGACGGCGCGTCGACGCTGAAGATGTACTG
CHR	465618	Rev	8.21333	e--1								aTSS	HVO_0534	0534n					3	-27	TCGTCGTCCGGGAGGTCGGTCGATTCCTCCAGACCGAACGACATGTTCTGGCGGACGGTCATGTGCGGGTA
CHR	467680	Fwd	9.16667	e1--			467702	22	HVO_0536	176	MIS										TCCGATATCGACAAACGTGATTTTAGGCCACACGAAAAATTGTTCGTTCTCGGATAAGTATTAAGTGCTCG
CHR	468522	Rev	852.833	e100	468521	1			HVO_0537	55	CHY							6.65		-28	TCAACAAATGGCACTAATTTGCCGCGACGGAACCGTACCCTTTTTGTTTTAGGCCCCCCTAAAGCGTCGCA
CHR	470403	Rev	4.52667	e--1								iTSS	HVO_0540	0540n							GCTCGTCCTCGGAACGGGGCTCGTCGAGCCGTTCGCACCACTTTCGTACCCGCCGGTCGTGTTCCTCTCGG
CHR	471163	Rev	9.75333	e--1								iTSS	HVO_0541	0541n							ATGCTCGACGACGTGGAGGGCGGCTACACGATTCACCACCCGCCGGGCGAGGAGACGACCGTCTTCGAGGC
CHR	473552	Rev	1714.29	e011	473552	0			HVO_0541	938	CIM										GTTCGCCCCGATTCCGACGGTGTGAGAACGAGTCCCGCATTCAAGCCCGCGGAGACCCTATCGGTCGACCA
CHR	474102	Rev	39.51	e011	474102	0			HVO_0542	139	CHY										CCACCCGACGCCGGGGTCGCGCGCTTCAGGCGGGCGTACGCCTATGGCCTCGGCGCGCCTTTTGATACGCA
CHR	474462	Rev	24.1233	e--1	474461	1			HVO_0543	86	EM										TCAGAAACAAATTTGTGATCTGATAAGATACGACGAGAAGACTCAACAGGCCGCGGCGACGACATCGGACG
CHR	474744	Fwd	16.94	e1-0								iTSS	HVO_0544	0544n1							TTTTCTAACTCAGAACCGAATACATAACGAACGAGTACAATTTATGACAGTCGATACTGACGCACCCGAGG
CHR	474797	Rev	3.27	e--1								aTSS	HVO_0544	0544n2							TCGTGAACGCGTCTCTGATGTAGAGGAACGCGCCCGAGATGATGCCCGTGTCGAACCCGAACAGCAGTCCG
CHR	477917	Rev	26.6867	e1-1	477917	0			HVO_0547	214	CHY								2.86	-28	ACCGACGACGACCCCCCGCGGTCGCCGGGCGACCGGCAGGCGTATTTCCGTTCGTCCAGTAGCCGCGGACA
CHR	479485	Rev	10.25	e1-1								iTSS	HVO_0548	0548n					1.68	-28	ACCCGCCACGACGATACCCGCTTTCGGTAATGGCAACACTCTCGTTCGAACCGCTGACGTACGACGACATC
CHR	480625	Rev	5.97333	e--1	480625	0			HVO_0549	320	CIM								3.29	-28	CGAATCAACCGCGGGCGCGAACCTCGTCGGCAACGCCGGACGTTTATATCGCGCCTGCGAACGGCCGTCCA
CHR	489528	Fwd	5.29333	e--1								iTSS	HVO_0554	0554n1							TCTCCGTCGTCGCCAACGAGGTCAAGGAGCTCGCCGGCGAGACTAAGTCCTCCGCCGAGGAAATCGAGGCG
CHR	489732	Rev	5.60667	e1-1								aTSS	HVO_0554	0554n2					4.45	-28	CGGCCGCGACCGATTCGGCTCGCTCGGCGGTCTCGTCACTGATATCCGAGACGCGGTCCATCATCGACGCG
CHR	492073	Fwd	9.88333	e111			492257	184	HVO_0556	331	ISH								2.88	-27	TACTGACAGTTTGTTGAGGCCGTGCTGACTTGATGGAAATTCTGCTATCCCTGCGGAGCGTGAATCAAGCA
CHR	492424	Rev	112.173	e01-								aTSS	HVO_0556	0556n1					1.83	-31	GAGCGATGAGCGTCAGTTTACTTGGATGAGCGACGGTTACGTCCAAGTACTCCGCGAGCGTATCGTAGACG
CHR	492446	Rev	41.5567	e1-1								aTSS	HVO_0556	0556n2					2.3	-31	CGGTCGGTTTTCTTGTCGGAGTGAGCGATGAGCGTCAGTTTACTTGGATGAGCGACGGTTACGTCCAAGTA
CHR	492905	Fwd	6.74667	e111								iTSS	HVO_0556	0556n3					2.41	-28	GATTGAGGAGCGCGCTGGGTCTCTACCCGAGACCCAGCTGCTCATGACGATTCCTGGTGTCAGTTACTACT
CHR	492909	Rev	22.8467	e011								aTSS	HVO_0556	0556n4				6.85		-28	CATGTAACTCACGACCTCCTTGTGGCTGTCGAACCGATCAACTTCTCCAAGTTCTGCGTAGATCAGCAACG
CHR	493072	Fwd	8.64667	e-11								iTSS	HVO_0556	0556n5							AGTCCGGCGACTCGCGGATCGAGGGTGGTATCTCGAAACGTGGTTCAGGACGGGTGCGGTGGATTTTGGTT
CHR	493210	Fwd	12.43	e--1								iTSS	HVO_0556	0556n6							ACCGTCGGATGACCCCGAAAAAAGCAATCGTTGCGACGGCGCGAAAACTGCTCGTCTCGATGTACTACATG
CHR	494351	Rev	7.96333	e--1	494351	0			HVO_0558	270	CP										GGTTCGGGGGTCGGAGGGAGGGGCGCGCCCGTGCCGCGGCTTTATTCGGGGGCGACGCCAACCTCGGGATA
CHR	494488	Fwd	11.06	e111	494488	0			HVO_0559	117	GEN								2.47	-28	AACCACCGCCGCTGGCGACGACATCGCCGGAAGCGACGCGCCTTTGCCGCTCCGCCCGTTCACGTGGGGTA
CHR	495124	Rev	13.1967	e--1	495119	5			HVO_0560	63	CHY								1.79	-28	ATCGACCGCCGAGCCGTAGCTCCGTCCCGAGGCCCCCACGCTTATCGGGACGGGGCCGGACCATCGAATCG
CHR	495928	Rev	352.477	e110			495816	112	HVO_0561	196	TL							7.28		-28	CACGTGAGTCGGTGGCACGCGCGCCGTGAGAATCCGAAGTCCTTAACCCTCCCCTGTTGGTAGTTCCGCCA
CHR	496533	Rev	27.23	e110								iTSS	HVO_0562	0562n1							CGCGCTGTCGCGCCGGCAGTTCATCGGGCGCTCGAAGGTGCTGTACGGCTACGTGCTGTTCACCCAAATCG
CHR	496565	Fwd	13.9467	e--1								aTSS	HVO_0562	0562n2					1.98	-29	GTACAGCGCGATGAGGAGCGCGACGCCCAGCCCGCCGCCGATTTGGGTGAACAGCACGTAGCCGTACAGCA
CHR	497871	Fwd	22.97	e111								aTSS	HVO_0563	0563n1							CCATCGAGTTCCAGAACTGGCCGTCCGAGAGGACCGTCACGTAGTTGGCGAGGCCGACCCACTGCTCTTTG
CHR	497916	Rev	40.91	e-1-								iTSS	HVO_0563	0563n2				5.99		-28	CCTTGCTGTTGGTACTGCCGGGGCTGTTCGTCTTCCTCGCGTTCATGCTGTTTCCCGTCCTGTACCTGGTG
CHR	498701	Fwd	63.7167	e011								aTSS	HVO_0564	0564n					3.36	-28	CCTCGTTCGACAGGCCGAGTTCGACGTTCGACTCGTCGAAGTAATAGCCGCCGAAGGCGTGCGCCCACGCG
CHR	501251	Rev	6.22	e--1								iTSS	HVO_0566	0566n							CGCGACTGTTACGCCCTCCGCGTCGCCGACGGCGAACTCGACGACCGCTACGACTCCGCCGCGCTCGCGCT
CHR	505275	Fwd	263.167	e111								iTSS	HVO_0568	0568n1					3.22	-28	AGCCAGATCGCCGACGCGGCGGGCGTCTCCAAGCGCTACGTTTACAGCGTGAGCAAGGAACTGGAATCGCG
CHR	505410	Rev	6.32667	e--1								aTSS	HVO_0568	0568n2							GACGAGTTCTCCGATGCGCTTGAGCACCGTCACGCGGGACTTGATGACCTCGAAGCGCTCTTGGTCCCGGG
CHR	506692	Rev	12.1333	e-10								iTSS	HVO_0569	0569n1				4.8		-28	GCCGCGCCCAGTCGACCACAACCGCCACGCAATCATCATGGCGAAGTTCGACGGCGTCGAACTCGCCAAGG
CHR	507274	Rev	47.01	e111	507274	0			HVO_0569	303	MIS								4.5	-28	TATGAGATTTATCGCGGGCGAGATACGCCGACTCGCGGGCCTTTTACGCCTCGCCGACGGACGGACGTGCA
CHR	507723	Fwd	11.6167	e--1								intergenic		0569n2					2.66	-27	CTGTCGCTTGACTCCGGGTCCCCCATGTGACAACCGTTCCATACTTGACAATAACGGATGAAACCTCGTTG
CHR	508865	Rev	260.81	e110	508865	0			HVO_0570	351	SIG							5.87		-28	CTACCGCGTCAACGCCGAGTGACAACTCGTTTCAGAGAAGCGTTATTAGCACTAGGAGAGTCAACGAACCG
CHR	509564	Rev	20.0533	e011	509564	0			HVO_0571	216	CHY							4.94		-27	CGCCCGCCGACGCAACCGGCGCTGCCGACGCGAGCGATTCCGTTAAACCGCATCGCGGTGACGTGGGACCA
CHR	509723	Fwd	14.4633	e-11	509723	0			HVO_0572	275	MIS								4.03	-27	CGGCGAGACCGGGCGGCCCCGCGCGGCCGAGCGTCGAAATCGCTTTCCCCCGGTTGGACGAAGCCGACGTA
CHR	510605	Fwd	79.0533	e111	510605	0			HVO_0573	291	RRR							5.38		-28	GTCGCGGTCCGACTGAGCGGCCGCCGACAACTCCGAAGTCCCTTTGTTCGGGTACGCCGTCGGACTCTGCA
CHR	514856	Rev	8.68333	e1-1	514855	1			HVO_0579	214	CHY										CCGGCGGCTCGACCGCACTCGGTCACGCTCGGTCGCAACCGGTTTGACCCTCCGAACCCCACGGACAGTCG
CHR	514995	Fwd	153.467	e101	514996	1			HVO_0580	321	RMT								2.86	-28	GGGCGCGCGAGCGACGCCGCGGTCGCCCCGAGGCGAAACCCGTATCCCTCCTGCCGGGCAACCGACCGGCA
CHR	516776	Fwd	13.62	e--1								aTSS	HVO_0581	0581n1					3.59	-29	TTGACGGTCTCGGCGATAATCTGGTCCATGACCGAGAACGCCTTGCCGATGGGCAGGTTCGGGACGTAATC
CHR	516980	Rev	48.39	e--1								iTSS	HVO_0581	0581n2							TGAGCGCGCGACCGAGATGGCACAGGGCACGATCAAAGACGTGCTCGGCGACGCCGACCTCGTGTTCGTCA
CHR	517139	Fwd	25.98	e110								aTSS	HVO_0581	0581n3					3.21	-30	CCGGCGCCGAGACCCTGCGTCAGGGACTTCCCGACGAGGATTTTCGTGTCCGCTTCGATCATCTTCAGGTG
CHR	517382	Fwd	79.94	e111								aTSS	HVO_0582	0582n							CGTTCCATCGCCTCGCGAACGATATCCTGCATAGTTACACCTTTGCCCAGCCGCGCTTGCTGGTAGATTCG
CHR	517762	Fwd	24.5333	e1-1								aTSS	HVO_0583	0583n							GCGGTTGTAAGACAGAGGCTGAATATCCCGTATAGGGGGCTTTAATCGCCGGTTATGCTTGTTCCAGAACG
CHR	518429	Fwd	20.7267	e100											HVO_0584	518441	12				TGTTCGTACCTGTCTGACACACAGCACACGCGGCAGCGAGAATGATAATGGTTAAACGCGTCGACCAGATA
CHR	518823	Fwd	13.4733	e1-1			518847	24	HVO_0585	327	GEN										TCCCCCGTTCCGTCACCTCAGACCCTCACGAACAATCGGAGTATATCTCGCCGCGACCCCGTAATTTACCC
CHR	519157	Fwd	29.4767	e111								iTSS	HVO_0585	0585n1							AAGGCGGGGCGGCGGCTCGACCCCCACGAGGCCGACGGCTACAACCGCGAGAACCTCGAACGGTTCGTGTA
CHR	519862	Rev	5.06667	e--1								intergenic		0585n2							CGACGAGCGTGCCGAAGAGGTCGAACGTGACTGCCACTAGAATTTCATTGGCGAAACTGTACTTGAATATA
CHR	527070	Fwd	29.94	e--1	527070	0			HVO_0595	257	GEN							5.67		-28	CACGATATTCGTCGGCGCGCGTCCACCCCCGTTCCGAACACTTATGCGAAATCGCCGGGCACGTGGGGGCA
CHR	527851	Fwd	22.5267	e110								iTSS	HVO_0596	0596n							GAAGGCGACGGCCGCGAGGTCGCAGAGCGGTTCAAAAGCGCCGTCGTCCCCGAGCGAATATGAGAATCCCG
CHR	528485	Fwd	14.0633	e10-	528489	4			HVO_0597	155	GEN										CAGTCGCTGACACGCTTCTCGACGGTTGAGAACCGTCTTCTGTGGCTATCGCTCTGCGGCGTCTCTCTCTA
CHR	529883	Fwd	2988.44	e111											HVO_0598s	529915	32	12.48		-28	GTGTGTTCTGAACACACGCAGCATATGACATTTGAAAAATGTTTTAATGGAGGACGTTGTAGCGTCTACTG
CHR	530400	Fwd	53.83	e-11								aTSS	HVO_0599	0599n1				6.18		-28	CCTCCCCGAGCGGACTGTGGTCGAGGACGTCCTCGGCGCAGATTTCGTCGATGAGGCCGACGTTCCCCTCG
CHR	530545	Rev	14.3833	e011			530474	71	HVO_0599	146	GEN							6.51		-28	AGTACTGTCTGCTGGACGCCGAGACGATGCACAGAAAATAGTTAACAGCCCACACAGCGTAGAGTTCGGTG
CHR	530959	Rev	17.27	e101								intergenic		0599n2					2.4	-29	TAACGCGTCGTTCATTGTCGAAGTTCGTGCGAGCACACCCATATACGTATTGCGTTCGAACGGGTCGGGCA
CHR	532941	Fwd	18.01	e--1								aTSS	HVO_0602	0602n					3.63	-28	CGTCGTTGACGGCCTCCAAGAGCGTGAGCGTGTCGCGCTGGTTTTGGGGGTACACCGCCACCTTCGCAACG
CHR	534561	Rev	25.07	e111	534561	0			HVO_0603	222	AA							7.28		-28	GACTGACAGGTGACGGCGAAACGCGCTCGGCGGGGAACTATTTTTATACGAGTGCTTGGTATCAAGTTCCA
CHR	534887	Fwd	63.5233	e001	534891	4			HVO_0604	298	GEN							6.62		-28	CGCGTTTCCGAGCGAGACGAACTTACCGCCGCCACCAAGATTTAAATCGGGGAGTTCCGTATCCCTCAGTA
CHR	536621	Rev	21.5967	e111	536621	0			HVO_0605	257	REG										GACCCGCCAAACTCCAACATCGTTGAAACGAATCGGTGCTATTAGGGACGCGGTGGCCCATCGTCAAGTCA
CHR	537532	Rev	102.56	e011	537532	0			HVO_0606	229	GEN								3.94	-31	ACCCGCGACGCGGACCGCAAGCGTTCGACCGACCGATAGTTTAACGTGAATCGTCCGCATCGAGTCGGGTA
CHR	538750	Rev	141.153	e001	538747	3			HVO_0607	336	GEN							6.67		-28	GGTATCGACCGTCGCGCCATATTCGGAGCGACCACAATGCTTATTGTATGGATTGTTCAAACATTCGGGTA
CHR	538955	Rev	166.96	e111			538747	208	HVO_0607	336	GEN										GGCTCTCGGCTCGTTTTGGCTAACCCGCGCATACATCTCCTTGAATACCGCCGGGGTATAAATCTACGCTC
CHR	538994	Fwd	54.9233	e110	538994	0			HVO_0608	347	GEN								1.99	-28	GTCGACCGTTGCCCGCAAGCTTCTCCCCCAAGAGCGTAGATTTATACCCCGGCGGTATTCAAGGAGATGTA
CHR	539475	Fwd	119.523	e110								iTSS	HVO_0608	0608n					3.42	-27	AACGTCGAACCGAAGCACGCGGCGCTCGTCGAACCGACGGCGATTTGCACGCGTGCGGTCATTCAGAACTC
CHR	541064	Rev	6.09	e--1			540904	160	HVO_0609	215	GEN										CTTTCCCCGTCCGTTCGGGGCTGAAAGTCACGACACGGGAGGTAAGTACGGTCGAGACCATCGTCCAGTCA
CHR	541174	Fwd	1187.1	e-11			541192	18	HVO_0610	171	GEN							12.45		-28	GTGACTTTCAGCCCCGAACGGACGGGGAAAGACCAATATGTTTATTACATACGATTGCTTGGTATCATACC
CHR	541491	Fwd	21.0567	e01-								iTSS	HVO_0610	0610n							AAATCTCGGAGTTCGACTTCAAGCCCGCGGCCGTCGTCGCGGGGTTCCTCGTCGCGTACGTCCTCGTGATG
CHR	543606	Fwd	46.2733	e110			543730	124	HVO_0612	143	GEN										TAACGAGATTCGGTCGATTTCGGTTTAGTTACGATACTGTTGAAATACATCCGGCTCGACGGTCGAACTCA
CHR	543730	Fwd	52.37	e001	543730	0			HVO_0612	143	GEN							6.64		-28	CGGCGCTCGGTGGTCGCTCCGAATGGGATTCGGCGAAACGATATTATATCCCACCGTGGTACACGCTGGTA
CHR	544292	Fwd	19.9767	e--1	544296	4			HVO_0613	215	GEN										GGACCGCCGCGTTACACGCGCGTGAGAACGCGCGTCTCCCCTTTTATCGCGACTCGCCGTAGTCTCGACCG
CHR	550314	Fwd	2.65	e--1								aTSS	HVO_0620	0620n							GCTCCGGCGTCGAACTCGGTCACGGGTCGGCCTCGTCGTCGCGGTCGCGGTGGTGGGTGTGGTCGTCCACC
CHR	553078	Fwd	0.413333	e--1								aTSS	HVO_0621	0621n1					1.93	-30	TCGATGGCGGCGAGTTCGCTCGCGTTGATGCCGGGGCCGTTGTCCTCGATTCGAATCACGAGTTCGTCGTC
CHR	554633	Rev	173.237	e111			554593	40	HVO_0621	580	SIG							8.95		-28	GACCCGGGCCGGGACAGTCGGACCCGGTTCTTGAATACTCTTTTGACATATGGTGTATAATTACCGTGGTA
CHR	554696	Fwd	17.7033	e11-								intergenic		0621n2				8.07		-28	GAGTCACTACCACGGTAATTATACACCATATGTCAAAAGAGTATTCAAGAACCGGGTCCGACTGTCCCGGC
CHR	555884	Fwd	12.7067	e111								iTSS	HVO_0623	0623n1				4.96		-28	GACGGCGGCGACAGCCGAGCGAGTGGAGACGACCGTCGAGGTCAAACTGACCGGCCACGTCAGGTCGGCTG
CHR	556090	Rev	7.98333	e--1								aTSS	HVO_0623	0623n2							CGCGGTCGCCGTCTTCGAGTCGCGTGTCGAAGCCGTCGAGGTTCTCGTTGAACACGCCGTTGACGAGCACG
CHR	556293	Fwd	12.8467	e--1	556293	0			HVO_0624	170	CHY										GACGTGGCCGCGGGTCGTCCTGATGCCCGACCGCCACAGGACTAACGTCCGCTGCCGACAGAGGGGAGGTA
CHR	556924	Rev	3.99	e1--								iTSS	HVO_0625	0625n				5.45		-28	CCACGGCTCGACGACCGTCGTCTCGACCCTCGGAGCCATGTACTTCGTCGTCGCGGCCGTCATCGGCGTCG
CHR	557287	Rev	8.03	e--1			557266	21	HVO_0625	141	TP								4.32	-28	CGAGTTCCGAACGCGGTTAGCCGCCCCCGCATAGACACCGCTTATACTGGAGGTCCGGTTTCTTTCGGATA
CHR	557884	Rev	7.86333	e--1	557884	0			HVO_0626	169	CHY							5.36		-28	GACGCGCGAAAGCGCGCGACTGTGGCGGGAGAAGCCAAAGTTTAGGTAGCGGACTCCGACACCATGCCGCA
CHR	560896	Fwd	21.47	e-11	560896	0			HVO_0628	574	TP							7.79		-27	TCGGTGGTGTCTCTCGTTCCGTCCTTCAGCGCTTCGTTATTTTTATAGGGAGTCATTGATAGGTACACGTA
CHR	560922	Fwd	24.3	e1--								iTSS	HVO_0628	0628n1							CAGCGCTTCGTTATTTTTATAGGGAGTCATTGATAGGTACACGTATGTCACAAGATGGCAATGATGTTTCG
CHR	561798	Rev	12.6033	e111								aTSS	HVO_0628	0628n2					3.25	-31	CCTCGCGGCTCGCCATGTTGAACGCCATGTAGCCGATGTTGATACCCTCGGTGCGGACGAGGTTCGCGTTG
CHR	562091	Rev	13.2	e111								aTSS	HVO_0628	0628n3							GAGGTTGGACGCGACGGTCTCGGCGGTCTGAATCGGCGACGGGTTGTAGCCGCGGGGGTTCTGGAACGTCG
CHR	563426	Fwd	14.9133	e111								iTSS	HVO_0629	0629n							CTACATGCGGACCGCCCGCGCGAAGGGCCAAGGCGCGAAGATTACGGTCCTGAAGCACGGCTTCCGCAACG
CHR	566923	Fwd	13.92	e11-								aTSS	HVO_0632	0632n					4.19	-31	GAAGTGGGTGAGCTCCCCGTCGTCGTAGACCGGCGATATCTTCAGGTCGTTCCAGAACGGCGTTCCGTCCT
CHR	568167	Fwd	9.88333	e111								aTSS	HVO_0633	0633n1					1.9	-26	GTCTATCGGGATGCCGACGGACTCGGAGCGGTGTCGGAAGCTCCGTTTGCTCTCCTCGAACAGATAGACTG
CHR	568885	Rev	71.1533	e010								iTSS	HVO_0633	0633n2					1.68	-28	CGGAGAATCCGGGGCGGGAAAGGCCATCGCCGGCTACCACTTCTTGACCGCCGGGCGCGAAAACGACGAGG
CHR	569050	Rev	68.3133	e110	569050	0			HVO_0633	484	MIS										TGTGATGCTCCGAGACGCGGCAGTTCGAGGCGGTGGTAGTTTCTTGGTGCGCCGGACAGATGTGTACGGTA
CHR	569435	Rev	62.4067	e110								iTSS	HVO_0634	0634n1					2	-29	AAGGCCGCCCACGACGAGACGCCGTGTCGGATGCGCGACCTCTATCAGGAGTACCTCCGACTGTGTAACTC
CHR	569467	Fwd	17.34	e101								aTSS	HVO_0634	0634n2					1.25	-28	TGTGGACCGACCGCTGGGCGAGCGGGTCGATGCCGGCGGAGTTACACAGTCGGAGGTACTCCTGATAGAGG
CHR	570172	Fwd	32.8067	e111								aTSS	HVO_0634	0634n3							GAAGCTCGTTGACGAGTTCGACCGCCACCTGATACGAGGAGTTGAGCGTCTTGCAGTTGATGGAGATGACG
CHR	570433	Rev	252.157	e011	570429	4			HVO_0634	408	MIS							4.8		-31	TCGTCGTCACAATTCACATGAATCAGATGAAATCGGGGTTTTAAATAAGGGGACGCTACAACGGACCGACG
CHR	571195	Fwd	12.39	e101	571195	0			HVO_0635	320	GEN								4.43	-28	GACAGTCGTCCCGCCGGCGACGGCCCCGCCCCTCGAAATGTCTTTACCTCGGATGCTGTTACCTACCCCCG
CHR	575469	Rev	17.0333	e111	575469	0			HVO_0639	316	MIS							4.94		-28	CGACCGACGAGCGACCGACCAGAGCGCCACCGACCAATGGGAATAAGTCGCACGCAGACCCGGGTGGTGTA
CHR	575664	Fwd	133.997	e01-											HVO_0640	575668	4	11.73		-28	TCCGTGTGACTCTCCGCCGCGGCCCTCGGAAATCGAAACGGATTAAACTATCCGCGAGAGAGGCAACAATG
CHR	576706	Fwd	43.18	e010	576706	0			HVO_0642	49	CHY								4	-26	CTGATACGCCCGACGGAGCGCGCTTCACGCCACCAAAACAGTTACTAATTAGACACGAATGCCGGTCAGTA
CHR	576784	Fwd	53.9	e11-								iTSS	HVO_0642	0642n				5.9		-28	CGCGCTCAAATACAGACTCGACGTCATCATCGCCCTCCTGTTTTTGGTCGTGCTCATCGAGAGTTACCGGG
CHR	576993	Fwd	29.4967	e111	576993	0			HVO_0643	59	CHY								2.96	-28	TGCAGTCCCTCGATTTCACTTTCACTCTCCTAGGATTCGATACATATCCCCTGCCCGCGTCAGCGAGGGTA
CHR	578883	Rev	664.88	e001			578780	103	HVO_0644	512	AA							5.95		-28	GTCCCCGGAGAGACACCAATTTCTGTCGGAACCATCTCTTTTATCCCTTCATCGACAAATGTGTTCAACTA
CHR	579438	Fwd	9.88	e1-1	579438	0			HVO_0646	180	CHY								4.38	-29	CACCGCCGGGCCGTCGGTTCGTCCGCCGTTGAGAGCAACGTTTAGGCCCGCCCCGCCCCGAACGCGCCCCA
CHR	580081	Fwd	32.3633	e111	580081	0			HVO_0647	183	NUM							5.05		-27	CTGATGCACGGATACGCGCATCTCGACCGTTCTTCGATTGACTTTTAGGCACGCTGGTCCAATCCGGGACA
CHR	583040	Rev	245.18	e011	583040	0			HVO_0649	68	GEN							7.6		-28	GCAAGTATCACCACGATTCGGTGCGGAGCCGTCCGACACAATTAAACAGGATAGTAATGTATGGTACCGTA
CHR	583297	Rev	19.9433	e0-1								iTSS	HVO_0650	0650n1							GAAGACGGCGTCCTCGACGTTGACGTGTACGTCAACGCGCCCGACGACGCCGACGACGCCGACGACGCGGA
CHR	583309	Rev	2.97	e--1								iTSS	HVO_0650	0650n2							ACCGTGACGTTCGAAGACGGCGTCCTCGACGTTGACGTGTACGTCAACGCGCCCGACGACGCCGACGACGC
CHR	583491	Fwd	8.9	e111								aTSS	HVO_0651	0651n				5.51		-28	AGATGAGGCCTTCAGCCGCCTCCGCGGCGGTTTCGACCACTTCTTCGTCCGTCGGCTGTGACATTTACGCG
CHR	583868	Rev	326.803	e101	583868	0			HVO_0651	127	CP								1.71	-29	GGGAGCGCGCTGTCGGAGTCCGCGTAGGAGACCGCGGGTGTTTTAGGGCCGGCGTCCCGTCGGTTCGGGTA
CHR	584356	Fwd	16.16	e--1								aTSS	HVO_0654	0654n							TCGCGCTTGCACCGGGAACACTTGTAGCTCATTGTGAAGATGTAAAGCGTCGAGGCTACTTGTGGGTTATT
CHR	584624	Rev	2528.97	e0-1	584621	3			HVO_0654	89	TL							7.84		-28	CGGTGTCTAGGCCCGTCAGGTCCCGAGACGACTCGTAGGGTTTATCCATACCGGCGAGGTAGTTCGCGGTA
CHR	584724	Fwd	90.5	e110	584724	0			HVO_0655	341	GEN								2.8	-28	ACCCTACGAGTCGTCTCGGGACCTGACGGGCCTAGACACCGCTTTGTCGCCGGCGCGCGTACGGGGGACCA
CHR	585424	Fwd	6.18	e--1								iTSS	HVO_0655	0655n							GCGCTCGGCGAGGTCTGGCACGTCCCGAACCCCGAAACGGTCTCGACGCGCCGCTTCGTCAACCTCGTCTA
CHR	586513	Rev	123.793	e111	586513	0			HVO_0656	241	GEN							7.63		-28	CGGGAGTCGCGGCGCGTCCATCTCGACCCGCATAAACGGCCTTTTGTACGCGCACGACCGACACGTCGATA
CHR	590765	Rev	11.07	e111								aTSS	HVO_0661	0661n				9.51		-28	GCGAGGAGCGCGCGGAACGTCGGCAGGAACGCGTCGACGACGATTTCTTCGATGAACTTCATTCGTCACCA
CHR	592508	Fwd	44.3533	e-01	592508	0			HVO_0664	155	CHY							5.21		-28	GTAACGGCCGTCGCCGCGTGACTCGATTAGCCGACAGAAACGATATGTCGGCCCCGTGTCAACCGACGGTA
CHR	593316	Fwd	8.58	e--1								aTSS	HVO_0665	0665n				6.54		-28	CGACGCCGGGGTGGACGACGCCCGTCGCGTCCACGATGCTGTCTTCGCTCTCCGAGACCCACATCGAGTCG
CHR	594094	Fwd	9.32333	e11-	594094	0			HVO_0666	495	GEN								2.5	-31	GTAGTAAAAATCTGGTGGTCGCGCGCGCGGCGACCTAGATATATCATGGACTATTGTGTATATCACTGGCA
CHR	597350	Rev	4.22667	e--1								iTSS	HVO_0668	0668n					4.01	-28	GAAATCATGTTCTCGGACTTCATCGGCGTCTGCTCCGAGCAGATAATCAACCAGATGGCGAAGAACCGCTA
CHR	598657	Fwd	32.42	e0-1								aTSS	HVO_0669	0669n							ACCGACGTAGAGGTGGACGAACCCGGGGAGTTCGCCGTCGCTGAATAGGTCGGCCGCCTTCGTGTCGAACG
CHR	601848	Rev	96.9733	e111	601848	0			HVO_0673	161	CHY								2.64	-28	GCGATTCGCGCCGGCGACGAGTGAAGACTGGGAGCAAGGCTATTTGCTGAGCGACACGAGATGTGTCGATA
CHR	602648	Rev	28.89	e110	602647	1			HVO_0674	250	COM								2.91	-29	GCTCGACTCCGCGTGAGTTCCGCGTCGGAGATGAGAAAACGTGTTACTGCCGCGGCGACGACCCACCACCA
CHR	603537	Rev	31.1	e011	603536	1			HVO_0675	277	COM								3.08	-26	CGTTCGACCGCGACTGACGCGGACGCGACGAAACGCAACACCGTTAACCGACCCCCGTCGTAGAAACACCG
CHR	604075	Rev	46.2733	e100			604046	29	HVO_0676	151	GEN								2.82	-28	ACGGCGCACCCCACCGACGCGACCCCATTTTTGCGAAACAGTCGTTAGCTCGCGGACACGTTAGAGCACTA
CHR	605702	Rev	130.67	e111	605702	0			HVO_0677	434	TL							7.36		-28	TGGACGGTCGAACGCCTCCGAGCGAGGCGAAGACACGATGTTTAAGACGAACGGTCGGGAACCACGTCGTA
CHR	607569	Fwd	7.44667	e--1								aTSS	HVO_0680	0680n1							TGCCGGAGTACTCGACGTAGATGATTTTCTGGCCGAACATCTTCTCGGCGACGCGGGCGAACGACGCCACG
CHR	607704	Fwd	12.48	e1-1								aTSS	HVO_0680	0680n2				6.78		-28	CGATGTACGCCTCGGTGTGGGTGCGGTCCCAGTCGAGGCCGTCTTCGATGCGGACCCACTCCTTGTGCGCG
CHR	608103	Fwd	60.4733	e011	608106	3			HVO_0682	334	MIS								4.06	-27	CGTGCGGATGGAACGGGTCACACGCATAGCCGGGAGTGAATTTTAACCCACCTGTCACCAAACCCGGTGTA
CHR	609080	Rev	13.6733	e--1								aTSS	HVO_0682	0682n					2.55	-30	TTGGTGCGGATACGGTTCGGAAGTGGCAGACGGCGGCGGATTAACTCCCGTTCCAAACGTATCGTTTTTCG
CHR	609704	Fwd	31.46	e--1								aTSS	HVO_0681	0681n1				5.35		-28	CGAGCATCTTGATGTGGTGGAGGTCGTGGTCCTCGCAGGACTCTTCCATGATGAGCGGCTTCCCCGTGGAA
CHR	609935	Fwd	26.6767	e1-1								aTSS	HVO_0681	0681n2				4.83		-28	CGCGGGACTCCATCAGCCCCTCGAACACCTCTCCGAGCATCTCTTTGGACTCCTCGGTCACGTCTTCGAGG
CHR	609962	Rev	11.3433	e1-1								iTSS	HVO_0681	0681n3							TGGAGGCCTCCGAGGACTTCGCGAAGCTCATCGTCAGCGAGGAGATGACCTCGCAACTCGAATCCGATATG
CHR	610116	Rev	8.93667	e1--								iTSS	HVO_0681	0681n4				5.3		-28	CCGCGGCGCTACGGCCAGTCGCGGCTCATCGAAACGATGGAACAGATGGGCATCGGGACGAAGGCGACCCG
CHR	610876	Rev	5.25333	e11-								iTSS	HVO_0681	0681n5				5.56		-28	GAAAGACGCCGACGGCGACGCCGAGTCGTTCGAGGCGCAGTACTTCTATCTCGACGACGACGGCACCGAAG
CHR	611630	Rev	166.567	e111	611629	1			HVO_0681	840	RRR								4.1	-28	GCGCGTTGAGGCCGCTACGCTTCGAATTCGGCACGAAAGGTTTAGGACAACCCCCGACATATCGCCGCTCA
CHR	614178	Rev	68.91	e101	614177	1			HVO_0684	496	TL								3.68	-27	CCGACCCGCGAACGGGGTCCACCGCGACCAGTCCCGTTAGTCTTTAGCCCACCGCCGTCGAAGCCCGGCCA
CHR	614330	Fwd	40.1567	e011			614347	17	HVO_0685	294	GEN							8.12		-29	CGAGCCCTGTGACACCCGACAGACAATCACTAACGAGGTTTTATATACTGGCGTTTCATCACCACGATTTA
CHR	615671	Fwd	22.5	e111								iTSS	HVO_0686	0686n				6.17		-28	GAAGCTCGTCCTCGTGGCCGTGTTCGTCTTCTTCGGCACGTTCTTCGGCTCGGCGCTCATCTCGCAGGCCG
CHR	617031	Fwd	32.2233	e0-1								iTSS	HVO_0687	0687n1							CAGCCCCGAGGCGATGGCGGCGGTCCGCGAAGCGAAAGCCGAAAAGCGCAGTCGCGAAGAGTACCTCGACG
CHR	617127	Rev	28.35	e-11								intergenic		0687n2							ACCCGGTTACTCATGGGTAACATAGCCCCGCGCGTGAGACATAAATGTGCGTCAGACAATCACCGAAAATG
CHR	617184	Fwd	296.98	e111	617184	0			HVO_0688	107	CHY							5.06		-28	CTCACACGTATCACATTTTCGGTGATTGTCTGACGCACATTTATGTCTCACGCGCGGGGCTATGTTACCCA
CHR	618330	Fwd	46.4767	e111								iTSS	HVO_0689	0689n1					3.13	-29	CTCGACCAACTCGCCGACGAGCGCGAGACCGCCCTCACCTACAAGGGACTCCGCGAAGAGAAAGAGGAGTA
CHR	619669	Rev	6.92333	e11-								aTSS	HVO_0689	0689n2							CCTCGTTGAGCGAGCGGCGGCGGTCTTCGAGCTTCGTAATCTCTTTCGCGAGGCGGTCGAGTTTGCCCTCG
CHR	622466	Fwd	23.8167	e110	622466	0			HVO_0691	158	CHY							5.68		-29	ACCCCGAACTCGAAGCCGAGGCCATCGCGGACGACTAGCTATTTTATCGGGCCCGCCGTCACTCTCGGACG
CHR	623810	Rev	52.93	e101	623810	0			HVO_0692	286	NUM							6.15		-28	CTTGAACCACGGCTTCGTGGTGTAGCGCCCGTTTCGCCACGATTTTGTGCGCCCTCCCCGACCTTCGAGTA
CHR	625720	Rev	98.8233	e-01			625706	14	HVO_0694	237	GEN								3.16	-27	TTTTGGCACGCCGACACACGGGCGGGGCGAGTCGTACAGATTAAAGGGCGTCAGGCGCGGCAGTACGCACG
CHR	627907	Rev	72.21	e001	627907	0			HVO_0697	255	GEN								4.5	-28	CGAGGAGCCGGAGTAGCCTCCGTCTTCGGCTACCGACGCTCTCTTAACCGGCGCGGCCGCCACTACGTGCA
CHR	628515	Fwd	18.5533	e1-0								aTSS	HVO_0699	0699n				6.61		-28	AGGGGACCGACACGTTCTGACGCGCGGTCTCGACGATGGTTTCGAGTTCGTCGTCGTCGAGTTCGACGCCG
CHR	629659	Fwd	739.737	e011	629659	0			HVO_0703	86	CHY								4.16	-28	GGTCTCCCCCGTCGCACACCGCACGCCGGAAGCCGAAGCGATTAAGCGGTGACTGTGCCAATCCCGGCACA
CHR	629706	Rev	24.2467	e1-0								aTSS	HVO_0703	0703n							CGGGACCGTGCCAGTCGCCCTGTCGGTCGACCGAAAACAGGACGTACTCCTCGCCGTCGTACTCGATGACG
CHR	632375	Fwd	61.65	e111	632375	0			HVO_0704	261	GEN								3.09	-27	CAATACGTTTTGTGATGGCCGGTGCGGCCAGAGCGGTTCGCTTTTTACCCCATTGAGTGAATGGTCGTGCA
CHR	633681	Fwd	2598.91	e100											HVO_0706	633681	0	6.64		-28	CTCACGGTGAAAATTGACACACGGCTCCCGAAACAGAAGTCTTAACAATAGCAGACTCGTTTGTTGATTCA
CHR	634314	Rev	12.3267	e1-1								aTSS	HVO_0707	0707n					3.8	-28	CGACGTTCGAACTCGAACTCCGGTCGGCCGGGTCGGTCTCGATTTCGCCCTGTCCGACGTAGTCGAACTCG
CHR	639324	Fwd	68.6967	e111			639441	117	HVO_0714	323	GEN								4.25	-28	GACCGTAGACTTGCATGGGCGGGAGGTGTCTTGCCGAAGATATAACTCGCCCGCCCGCGTCGGATTCCGCC
CHR	640507	Fwd	22.9133	e010	640510	3			HVO_0715	450	TP										GTCTCTCGCGCCCGTCTCGGGCCGATTTTGAAACACAAGAGCTACCCGCTTCGGCTTCGGTCTTGTAGCCG
CHR	641175	Fwd	30.09	e-01								iTSS	HVO_0715	0715n1					4.18	-27	ACATCTTCGTGGCGATGAACTCGCCGCACGAGGACGAAGAGCAAATCGGCGTGCCCGCGTACCTCCAGTCG
CHR	641439	Fwd	8.91	e1-1								iTSS	HVO_0715	0715n2					4.15	-27	ACCTCGTCAACAAGGCGCGGTCGACCGCCGGCTTCAACGCGCTCATCTCCTCGAAGCTCAACCAGTGGACG
CHR	641647	Fwd	19.16	e101								iTSS	HVO_0715	0715n3							GTTCTCCATCAGCCTCCGCGAGGCGGTCGCCCTGCTCGGACTCTTCTTGGCACAGTTCGTCTACTCCGTCA
CHR	641785	Fwd	161.25	e111								iTSS	HVO_0715	0715n4					3.98	-28	CATCGGCTTCTCCGTCGTCTATCTGGTCGTCGGAACAACGCTTTTCGTCCGGCGGCGCGAGCAACTCGCCG
CHR	643651	Fwd	15.4067	e111								iTSS	HVO_0717	0717n1							GTAACACCGTCAACCGGATGCACGAGGAGGGAATCAAGGGGGCGAAGCTCGTCGCCGCCAACACCGACGTG
CHR	643716	Fwd	30.91	e111								iTSS	HVO_0717	0717n2							GACGTGCAGCACCTCGTGGAAATCGGGGCCGATACGAAGATTCTCATGGGCGAGCAGAAGACCCAAGGCCG
CHR	645827	Rev	184.09	e111	645827	0			HVO_0720	100	GEN							7.76		-28	GTGGTTGCTATTTGTCGAACGGCGGCCGGTCGAAGAAACGGTTTTGTGGCTCACGGCCGTCAGGGGGAACA
CHR	645926	Fwd	40	e111	645926	0			HVO_0721	254	GEN							5.52		-28	ACCGTTTCTTCGACCGGCCGCCGTTCGACAAATAGCAACCACTAACTGGTGGCTGACCCGACCGTATCGTG
CHR	647271	Rev	136.823	e111	647271	0			HVO_0722	174	GEN								3.52	-28	GCCGGCCGCACGGCCGCCGTCGGTCGGTTCCGTGGGAAAGATTTGTATCCCGCCGGATCAGTCTGCATCCA
CHR	648022	Fwd	15.1567	e111	648022	0			HVO_0724	409	GEN								1.78	-28	GACCGGGCAAAAGTCCACCGGCGGTTCCGAGACCGAGAAGTACACAAAGCCCCGCGGTGTCGGGTCCGACA
CHR	648366	Fwd	28.0233	e111								iTSS	HVO_0724	0724n							ACTCTCTTTCCGACACGCTCGGCGTGCCGGTCCCGAACAAGCCAAGTCGCATCCGCGAGGAGATTCCCCTC
CHR	650163	Rev	29.3133	e010	650163	0			HVO_0725	281	GEN								1.86	-27	TCGCGGCGGGCGACAACCCCAATCGTGGCGAACCGCGTACACTTAACAGCGCGCGGTTCGACCTACCGACG
CHR	651649	Rev	45.3567	e010								iTSS	HVO_0727	0727n					4.05	-28	GAACGTCACCTACCTGTTCCTCGCGCTGATGTGGCTCACGTTCTTCTCACAGCTCGTCTTAGAGCAGTTCC
CHR	651968	Rev	131.077	e001	651967	1			HVO_0727	296	GEN							5.85		-28	TCAAGAGGTGCGTCAACACGCCTCGTCTATGAGGGAACCCCTTTTTATCTCGCCGCCGTAAGGCGTTGGTA
CHR	652623	Fwd	17.74	e--1								aTSS	HVO_0729	0729n1					2.89	-28	CCCAGCCCAGCGTCTCGACTTCCTTACCGGCTTCGAGGTTCTTGTAGGTCGCGAAGAACTCGTCAATCTCG
CHR	653018	Rev	284.273	e010	653018	0			HVO_0729	177	MIS								4.54	-28	GAAATCCGGACGACGGCGATACGAGACTAATCCCGAAAGGACTTTTGCCCGTATCGAGGATGGATTCGGTA
CHR	653026	Fwd	8.26	e--1								intergenic		0729n2					3.78	-29	GACTGCGTAGATTTCGTCCGGCGCGTTCGGGCCGGTCTCCATATCTTCCCAGAGGTTCACCATACCGAATC
CHR	653078	Fwd	38.53	e111								intergenic		0729n3					3.05	-27	AGGTTCACCATACCGAATCCATCCTCGATACGGGCAAAAGTCCTTTCGGGATTAGTCTCGTATCGCCGTCG
CHR	653354	Fwd	7352.23	e111	653354	0			HVO_0730	119	REG							8.64		-28	TACCTCGATTGGTAGTGAAACAGACTGCGCGTTGACAAAGTTTAAATAGGCAGATGACATTTCCATATGCA
CHR	655009	Fwd	311.27	e011	655014	5			HVO_0733	326	TC								2.81	-28	GTTGCGGCCGCGGTGACACACCGACGAACGCCGCCAAAGGTTGAAGTGCAAGGAAATAGACAATATATAAA
CHR	657178	Fwd	16.5867	e111								iTSS	HVO_0734	0734n							CAGGCGAAGGCGCTCGTCATCAGACACGTCTCCGACGACTACTGGGGGCCGGTCGGCGTCTGGCAGATACG
CHR	657377	Fwd	29.2333	e111	657377	0			HVO_0735	57	CHY							8.45		-27	CGGGCCTCCAGACCGACATCTTCGACTTCGCCTGAGCAACTATTTTGACAGTCGGATAATACGTTCTCGCA
CHR	658038	Rev	40.3667	e011	658038	0			HVO_0736	151	GEN								3.39	-29	GCGACGAGGCGTTCGTGTGGAGTCGATACACTACCATAGCTTTTCCCCGTCGGGGCGTCAACGGGGAGTCA
CHR	658099	Fwd	34.3967	e111								intergenic		0736n					2.41	-28	GGAGTGCCATGACTCCCCGTTGACGCCCCGACGGGGAAAAGCTATGGTAGTGTATCGACTCCACACGAACG
CHR	659073	Rev	159.453	e111	659073	0			HVO_0738	93	CHY							8.32		-28	CGCCGGCGGTGCGTCGCGGTCGCATGCGAATCTCGAAGGGATTATCATGCGCGGTGGCTAACCCTCGCGCA
CHR	659245	Fwd	73.9067	e011	659245	0			HVO_0739	329	CHY								3.11	-28	CCCGCGACGTGTCGAGAAGCAGACAATCGTCTGACGCATCGTTTTAGGGGCTGGTTTCGTAGTCGGGGCCA
CHR	661642	Rev	5.85667	e1-0								iTSS	HVO_0741	0741n					4.67	-28	CCCGCGGGCCGGAACGCGCGTCGCCGGCGACACCGAAGCGTCGATGTACGCCGCGCTCGACCTCCCGCTCG
CHR	663036	Rev	40.65	e001	663036	0			HVO_0742	146	CHY										GCGTGGCCCAGTCGAGGCACACACCGAACCGGGCGAAGGAGCGAAGTGCCGCGCGGGACAACGACAGGACG
CHR	663290	Fwd	44.8833	e110	663290	0			HVO_0743	449	GEN							7.7		-28	CCGTCGTCTCTCGTCGCAAACTCCGGCGGAGAGACGAACCTTCTTATGGTTCTCTTGGATACCGTGAGGTA
CHR	663935	Fwd	186.257	e110								iTSS	HVO_0743	0743n				7.28		-28	CTACATCGACCAGGACGACTGGGACCTCTTTTTCGGCGTCTTCATGACGACCGACCGCGTCAACCACTTCC
CHR	666157	Rev	9.58667	e1-1								iTSS	HVO_0745	0745n							ACCATCCCGCGGAAGGGCGTCGAGCGAGCGCGTCGCTGGGTCGAAGACGAGACCGGCAGTATGCAGGTCCG
CHR	673744	Fwd	5.69	e111								iTSS	HVO_0752	0752n					1.82	-28	CGCCGACCTCGCCGCGGCGCTGAATCCGCGGTTCGCAAAGACGATGCGCGCCCGGTACGACACCCCGCGCG
CHR	676653	Fwd	1.45333	e--1								iTSS	HVO_0753	0753n							CGCGCAGTTCCGCGTCCACGCCCGCGGCGACGCCGAGTCGCTGACGTACGCCCGCGACGGCTCGACGGTCG
CHR	678332	Fwd	35.1833	e111	678332	0			HVO_0756	394	GEN							5.3		-28	CGAAATTCTGTCACTCAGGACAGTTCGATTAGGGGGAATATTCATACGGTAGGCCCCGGTCGTGTTGTGTA
CHR	679608	Fwd	28.95	e111	679608	0			HVO_0757	363	GEN										GACCGGACCGGGACCACTATCGCGGACCCGGACCGGTGGCCCTTAACAGCCGGCCGCCGTAGCCCCGCCCA
CHR	680915	Rev	1060.68	e011	680915	0			HVO_0758	56	GEN							6.8		-28	CGGGGCGTCGTGCGGGTCGAAAACGGGGATTGTCGTCGGGTTTTTATGTTCGTTGCACAAACGGGAGCGTA
CHR	681037	Fwd	15.77	e--1	681037	0			HVO_0759	398	TP								4.33	-28	CGACCCGCACGACGCCCCGCGGTCTCGTTCAGCCGAAACTGTTGTCACCTCGCGGCGCGCGGTTCCGTCCG
CHR	682027	Fwd	4.88667	e--1								iTSS	HVO_0759	0759n					4.13	-31	CGTCGTCACCGCGGTCGTCGGCTACGTCATCCACAGCCTCTTTCCGGCGCTCGACGCCTACCTGCTCGACA
CHR	683933	Fwd	10.55	e1-1	683937	4			HVO_0762	198	GEN								2.12	-28	CGCGAGCGCCTCGACGCCGCGCTGGACGCGGAGGGGCAGGCCTAAGTCGCGGCATCGCTTTACGAACCGTG
CHR	684626	Fwd	38.99	e001								intergenic		0762n				5.17		-28	CGGCGCGGTCGCTCGCGGCGTCCGAACCAGTTCCGAAAAACAAAACAGCGTCGCGGACGTCGATCCCGTCA
CHR	685482	Fwd	12.7033	e011			685589	107	HVO_0764	260	CHY										CACGCGCTGCGGAACCGGTCGCTGCCGGGGCGATGCAGGGTATATAAACGCCCCGCGACGAGTCACCGTCG
CHR	685527	Fwd	215.327	e110			685589	62	HVO_0764	260	CHY							8.57		-28	AAACGCCCCGCGACGAGTCACCGTCGCCGTCATCGACAGGGTTTTGGCCTCCTCCGCGCTACTCGTTCTCA
CHR	686477	Fwd	71.4933	e010			686654	177	HVO_0765	388	GEN										CTGCGGTTCGCCCCGCCTGTGCCGCGCCGAGCACCGGAGGCCTTTTACGCGGTCGCCGGAGAGGACAGGTG
CHR	688509	Rev	58.4233	e111	688509	0			HVO_0767	52	GEN								4.76	-28	CCCCGAACCGCGTCGTGGGGGCGCTTCCGCCTCCCGCGCGTTTATGAGCGTGGGAGCGTAACTGACGGCCA
CHR	690153	Fwd	71.53	e111								iTSS	HVO_0768	0768n					2.98	-29	CTTTTGGTCGGGATTCCGGGCGAGCGCGAACTCGGGAAGACTATCGACGTGGCCGTCGTCGACCACGGCTA
CHR	690912	Rev	46.13	e010			690900	12	HVO_0769	134	GEN							5.09		-28	GGGACGCGGGTTCAGTAGTCGAATCCGCTGACTGCGGTACATCTTTAACACTCCGGCCTGACCACATATTG
CHR	691660	Rev	10.8567	e--1	691660	0			HVO_0770	231	CHY								1.45	-27	GCGGGTGGCCGGGGGTCGCGCCCCCGCGAAAAACCGCGCCCCTCTTTGGGCTCGCGCCCGCATCGCGGGTA
CHR	692658	Rev	9.79667	e--1			692545	113	HVO_0771	262	GEN										TCCGACCTCGTCGGCTCGCGCTACTCCTTCAAGGACGCGCGAAAGCAGGTCTACTTCCTCAACACGTAAGC
CHR	692762	Fwd	12.6967	e111								aTSS	HVO_0772	0772n1							CGTCCTTGAAGGAGTAGCGCGAGCCGACGAGGTCGGACTCTTCGAGACGGTTGAGCGCGTAGCGGACGGTA
CHR	692930	Rev	80.83	e--1								iTSS	HVO_0772	0772n2					4.57	-28	TATGTGTCTGGATTCTTTTCACACACTTGTAGCTAACCCTTAACACGGAGCAACCGACTGTGACGGGTATG
CHR	693215	Rev	12.7467	e111	693215	0			HVO_0772A	53	GEN								2.82	-29	CGCGGTGCGGAAGCGGGGTTCGACGGGCGGAGGGGAGGGGTTTTCGTCTGCCGAGCGCGCACCATGGTATA
CHR	694155	Fwd	107.553	e111	694155	0			HVO_0774	300	GEN										GGCGTTCTCACGGCAGATTTTAACACGGTTCTCGATTCACATTTAAGTACGTCCACCGCAACTGTCGGGTA
CHR	695765	Rev	1.58667	e--1								iTSS	HVO_0775	0775n							CGACGAGCGGTCGGTCGCGGTACGCGGGCGGGAGATAAGCCCCGAGCGCCTGGAGCGCGAACTGCATCAGG
CHR	695892	Rev	55.9833	e-01	695891	1			HVO_0775	274	GEN										CTGTGAGCGCGGTGAAACGACGACGGCGGATTCTACAACCTATTTGACAGCCACCGGAGAGTGACACCACA
CHR	696011	Rev	67.63	e11-			695891	120	HVO_0775	274	GEN								3.67	-29	CACGCGTGAACGATAGGAGTACCAAGCCAAAAAGTTGCGTTTCAAGCTCTCTCCGTACCGTTGTGGAGGAA
CHR	696724	Rev	15.32	e--1								aTSS	HVO_0776	0776n					1.72	-29	GGGTCGTCCATACAATCCGAATGGGTAGTCGGGTACCTATTGATGTGGGTTGATTATGTAACCCGCTATTG
CHR	697217	Fwd	3668.05	e010			697228	11	HVO_0778	524	CHP							10.01		-29	CCTGTCGTGCGATTTCGTAGCTCACTTCCGGCGAAACGTATTTATAGAACTGCAATCGTTGATAGCGGTTG
CHR	698989	Fwd	26.2	e--1	698990	1			HVO_0779	439	TP								4.01	-28	AGCCGCGCCGCCGAATAATACCTCTCAACTGGCCGCTACGTTCTTCCGTCGCGAGCGTCGAACTGCACGCC
CHR	699825	Rev	82.1267	e011								aTSS	HVO_0779	0779n					4.41	-28	GAGGCGCTTCGAGAGCCGCGCGGAGCTGAACAGCGTGGCGTTGATGGCGCTCCCCGTCGAAAACAGCGCCG
CHR	702336	Rev	136.06	e11-	702334	2			HVO_0782	181	COM							6.93		-28	TTCCTACCACCAGAATACCGGAGTTCTCCGAACTCGGCGTATTTATAAGTAATCCGGACTAACGCCCGACG
CHR	702548	Rev	101.587	e111								aTSS	HVO_0783	0783n1				6.96		-28	CGGCCTCGTCGTGCTGGAGCGACCCCCCGTCGTCGATACCCTCTTCCGAGGGCGCGTCGTCGGGTGAATCC
CHR	703748	Rev	5.17333	e111								aTSS	HVO_0783	0783n2							CGCGGGCGATGTCGCCAGCGACGCGGACGAGGCCGCCGAGGTTACGGAATTCGAGGGTGAGGTGGCCCTTG
CHR	706527	Rev	3.42333	e--1	706527	0			HVO_0786	151	RRR								2.49	-28	CCGAGCGCAGTCACCCCAACCGCACGCCGTCGCCGGAAGGGTCAAGCGTCCGGCGACGGGAGCCGAACGTA
CHR	707545	Fwd	13.16	e111								iTSS	HVO_0788	0788n				5.14		-28	CAAATTCGGCGACTACGGCGGACAGTACGTTCCCGAGGCACTCATGCCGGCCATCGAGGAACTGACCGACG
CHR	709967	Rev	151.613	e111								aTSS	HVO_0790	0790n					2.56	-27	TGCCGGGGCCGCGGGCGTAGGACATTGCGAGAACGGGCACGCTGAAGTCGGCGGCACGAGAACAGAGGTCA
CHR	710480	Fwd	203.143	e111	710480	0			HVO_0791	137	RRR								3.08	-27	TCCGACGGGGTTCTGTTTTCCCGACACCGCTGGCCTACAACTAGATACCCGCCGAGCGCGAACGCTACCCA
CHR	711353	Fwd	17.01	e100								intergenic		0791n							CACTGACGAACTCGGTGACTGACACACCGGTGACGACGCGCTCACGTTCACGCGCGACCTGCTGTCTTTCG
CHR	711643	Fwd	33.1967	e101	711644	1			HVO_0792	392	AA							5.64		-27	CGTTCGCTATCCGCTCGCCGTCCGTTGGTTCATTCGCCACGTTCAAGCCCGCCCACCGAGTGAAGTCGATA
CHR	711677	Fwd	61.9067	e11-								iTSS	HVO_0792	0792n1							CGCCACGTTCAAGCCCGCCCACCGAGTGAAGTCGATAATGACACGAAGCGTCTGGCTCAAAGCCGACGACG
CHR	712020	Fwd	28.3367	e101								iTSS	HVO_0792	0792n2							GACCTGACGACGCTCCGCCGCGGCGACGACCTCGCAAACGGCTCGTACGTTCGCATCCTGAGCAAAGACTA
CHR	712721	Fwd	29.58	e101								iTSS	HVO_0792	0792n3				6.63		-28	GGGCGACCGCGTCACGACGCTCCTCCAGAACGCCGAGACAATCAAGGTCCACACCCGCGAGGGTCGGACCG
CHR	712777	Fwd	44.1833	e1-1								iTSS	HVO_0792	0792n4							GCGAGGGTCGGACCGCGGTCACCGACCTCGAACCCGGCGACGAGATGCTCATCTACTACGAAGACACGGCG
CHR	713288	Rev	19.11	e111	713287	1			HVO_0793	131	CHY							9.22		-28	ATTCGGTAGTGAGTTGCTGACTGTCCGACAATCCAGACGTTTAAGAGCGCGGACGACGACGCCAACGAACG
CHR	713841	Fwd	5.07667	e--1								aTSS	HVO_0794	0794n1							CGAGCGTCGTGGTCCCGGTGCCGACGAAGGGGTCGAAGACGGTGTCGCCGTAGACCGAGTACATCCGAATC
CHR	714482	Rev	45.3367	e110								iTSS	HVO_0794	0794n2							TCGGACCCCCGCGCCGAGGCGAAGGGTTTTGTTTCGGGGGAAATACGTCCGTACGATGCGCACGACGCACG
CHR	714758	Rev	14.18	e11-								iTSS	HVO_0795	0795n							CGTCCCGCGGTTCGCCAGCGAGCTCGGCCTCTCCGACGAGTCGAAGATGCGCGCGCGCCAACTCCTGAAGA
CHR	715633	Rev	149.19	e111			715568	65	HVO_0795	335	TC							7.4		-28	ACGGGTGAACGCCGCCGCTGCCGAAAGCGATACCAAACCATTTATGCGGTCGTCTGCGGTTGCTGGTGTTA
CHR	719092	Rev	44.9567	e101	719091	1			HVO_0798	624	MIS							7.06		-28	CTTCCGTCTAAGCGGAGCGTACCGACTCCAAGACAGAAAATTCATACGCGGATAGCGGCCATACGACGACA
CHR	719373	Fwd	243.62	e111	719373	0			HVO_0799	89	CHY								1.93	-28	ATCGCAAGACTGCGACGTGTTAAGCTCCCGTACCAAACCCCTGATAGGCGTCTCGTCTCTCTGTGTAGGTA
CHR	720997	Fwd	13.4633	e111								aTSS	HVO_0801	0801n					1.89	-28	TGGAGAGGCCCTCCATGTCCTGTACGTCGGAGCCGGTGAGCTGTTTGCCGTAGCGGCCGACGAGCGAGGTG
CHR	721839	Rev	208.93	e100	721839	0			HVO_0801	424	GEN							6.3		-28	CCCCGAAACCGTCCGACGTGACGCCCGTATCACACGAATACTTATCATTCTGCCAACCCAAGGCGGGCGTA
CHR	722581	Rev	22.9233	e111	722581	0			HVO_0802	200	CHY								1.61	-28	AATCCGGCGCGTCGAACGCGCGCCGCGTTCGACCCTCAATCCTTAATCGGGCGACGGCCCTAGACCCGGTA
CHR	723455	Rev	13.2733	e111								iTSS	HVO_0803	0803n1				5.51		-28	CGAGACCGTCGCCGACGAGGGCCTCGAACAGACCGTCAAGCAGTACACCGACGGCGACGTGTTCGAGACCG
CHR	723663	Fwd	20.6	e1-0								aTSS	HVO_0803	0803n2				6.85		-28	ACTCGCCTTGCGTGGCGACGACGACGGTGTCGACGCCGCGCTTTTTCGCGTGCGCGACGAAGCCCTTGATG
CHR	724530	Rev	24.5867	e111	724529	1			HVO_0805	82	CHY										ATCAACCACGACCGCGACAGCCGGTAGGAGTGCGGTAGCCCTTTCCCGCCGCGACGCCTACGCACGAGTCG
CHR	726331	Rev	94.3133	e111	726331	0			HVO_0806	585	CIM							7.28		-28	GTATGCGAACCCGTTACTCGGCACCGAGTTCATCATCGGGCTTTTTTATCAGTCACTCGTAGGCGACGCCA
CHR	726436	Fwd	11.1367	e--1								intergenic		0806n							ATGATGAACTCGGTGCCGAGTAACGGGTTCGCATACGTACTCTCTATAGTTCGCCCGTCGAACTGACCGCT
CHR	726733	Rev	17.94	e101	726733	0			HVO_0807	95	CHY							6.14		-28	CCGGCGTTCGGCGCTCGAATCCCGCCCCGAGACCGGAGCCGATTTGAGCGGCGACGCTGGAGCGCCGTCCA
CHR	727387	Rev	16.8033	e1-1								iTSS	HVO_0809	0809n1				5.83		-28	CGTCGACATCGGCGTCGAAGAGCGCCAAATCGTCGCCGGCATCAAGCAGCTTCACGACCTCGATTCGCTTG
CHR	728846	Rev	65.9733	e111								iTSS	HVO_0809	0809n2				5.82		-28	CCGGCAACCCCGCGGAGTACCGCGAGCGCGAGCACAAGTTCTTCGCCGTCTCCGACCTCCAAGACTACCTG
CHR	729321	Rev	33.7867	e010								iTSS	HVO_0809	0809n3							CTCCACATCGGCCACCTCAGAACGTACGTCGGCGGCGACATATACAGTCGCTCGCTGCGAACACTCGGCCA
CHR	729658	Rev	353.187	e010			729463	195	HVO_0809	740	TL							6.21		-28	CGTCCCGAGCACACCGAGCGTTGCCGGAGTGTCCCAACAATTTATACGCCCGCTCGGCTTCAGTACCGGTG
CHR	730320	Rev	117.827	e111	730320	0			HVO_0810	188	CHY								3.85	-26	GTCGGGACCGGCGCGTAACTGACCGGTCCGAACCTGAAAACTTACAACCGACTGGCTTCGACTCTCTCGTG
CHR	731442	Rev	144.993	e110	731442	0			HVO_0811	357	COM							5.44		-28	TGGCCGTCGGCTGGGCGACGCGGCGCAATGGAGCGGAACCGATATACTGGGTGTGGTTATAGTGGGATACA
CHR	731794	Rev	26.91	e100								iTSS	HVO_0812	0812n							ACGACCTGACGCAGTACACTCTCGCGGTGGACCGCAACAACGAGCACGTCGCCGACATCTACGACGAACTG
CHR	733859	Rev	53.7033	e01-	733857	2			HVO_0812	761	CIM							7.27		-28	GAGTGAGTTTTCATTCATACTTGTTTCGTTCGCAAACTTCTTTATCGGGGTGCGGGACCATACGAACATCA
CHR	734301	Fwd	87.68	e111	734301	0			HVO_0814	199	GEN								3.72	-28	CGTGGGCCGCCGGCGGCAAATCGGTACGGGCAGCGGGGGGTTCATAATCGCTCGTCCCGTGATTTCTAGCG
CHR	735717	Rev	130.803	e101	735717	0			HVO_0815	259	REG								3.32	-29	CTGCGAGCGGGCGGTCGAACCGCGTGGTGGAGCAGGGGCCTTTTTAGTCAGTGCGTCCCACGTTCGGCACA
CHR	735848	Fwd	32.3067	e110	735848	0			HVO_0816	230	GEN								4.1	-28	CCGCTCGCAGGCCCTCGGCGCGGCGCGCGCCTCCGGTGGTAATTTGTCTCCGCCGACCCTCCACTCGGCCG
CHR	736391	Fwd	29.85	e111								iTSS	HVO_0816	0816n					2.27	-28	CGTCCTCTACGGACCCGACGCCTACCGCGGCGGCGACGTGCTGATGTTGCCGGCGTTCACCCGTCTCGCCG
CHR	737956	Fwd	24.05	e--1	737956	0			HVO_0818	389	AA								2.25	-28	CAAAGCCGCTACGGGTGGCGGCCATCGGCCGACGGGAAGGGCTTAGTCCCTCCCCCCGTAAGCCCCGCCCA
CHR	739212	Fwd	650.767	e001	739212	0			HVO_0819	231	REG							5.09		-28	ACTGGTCTCCCGCTCGAACCCTCTCGTTACCTCCATCAGACTTTTACTTTAGACGCATCTAATCCGTGGTA
CHR	739557	Fwd	4.91667	e111								iTSS	HVO_0819	0819n					4.63	-28	GTGGAGCGAGGTCCACGACGAGGCCGACGCGCTCGAACACCACATCAGCGAGGAGTTCGAAAAGCGGGTCG
CHR	741508	Rev	69.04	e111								intergenic		0821n							TCGTCGAGCACGCCGTGGCCCTGAAGCACGTTCCGGGGCAGCTTAATCCACGTCGATTTATCGAACATACG
CHR	741511	Fwd	10.3967	e--1	741511	0			HVO_0822	348	CIM								3.81	-28	GCCGGGCGTTCGGCGCGCCCCCGTCTCCGAGACGAGAAACACTATGAACCGTGGTGGTCGATTCCCGCGTA
CHR	741562	Fwd	35.0167	e11-								iTSS	HVO_0822	0822n				6.04		-28	TGGTGGTCGATTCCCGCGTATGTTCGATAAATCGACGTGGATTAAGCTGCCCCGGAACGTGCTTCAGGGCC
CHR	742827	Fwd	37.45	e011	742827	0			HVO_0823	213	GEN										TTGGTGGTACCGCTCTCAAACGCCGTCCGGAACCCGAAGACGGAATACGTCGTCTTCCCAATCCCCGGCCA
CHR	743574	Fwd	50.1533	e110	743574	0			HVO_0824	352	GEN							7.22		-28	CTCCGGTTCCCGGTCGCGTCGCGTCCTCGAAAACTGTGGATTTTTATTGCGCGGCGTAGTGGCGGCGAATA
CHR	744348	Fwd	6.41667	e1-1								iTSS	HVO_0824	0824n							GTTCCTCGGCGAACTCTCCGCGAACGAGGCGGTGCCAATCATGAAGGGCGCGCACGTCTTCGCGCAGACCG
CHR	745364	Rev	15.4267	e100	745364	0			HVO_0825	207	EM								3.5	-28	GAGGCGCGACACCCCCGACCGGCGGACGAGAACCAAAGTATTCACTACAAGCCCACACCAAGCGGCGGACA
CHR	746555	Rev	19.8167	e111	746555	0			HVO_0826	348	GEN								4.15	-28	GGATCATCGAGTGCCGGCACGGTCGCCTGGGACTGATGGACTTATCTACACCGGCAATTCATGCACTCGCA
CHR	746707	Fwd	152.273	e100	746707	0			HVO_0827	85	GEN							9.14		-28	TCGGAAGAACTCTAAATATAGTCATTGTTTTTCCGGAACGCTTTTCCAGTTCTCTCCGAAGGTACACCGTA
CHR	747742	Fwd	59.1467	e111								iTSS	HVO_0829	0829n1				7.41		-27	GCGAGGACACCCGACTTTCGGACTTCTGACACCCAAACCGATTTCTCGTCGCCGGGGCAATTCGAGGTATG
CHR	748522	Rev	11.6867	e--1								aTSS	HVO_0829	0829n2					4.75	-28	GCGCGTCGATGCGGTCGGGCGCGGTGAGTTCACCGAAGGTGAGTTCGGTGTAGCCCTCGACGTTCCGCGAG
CHR	749380	Fwd	104.45	e111								iTSS	HVO_0829	0829n3					4.53	-27	CCATCTCGCCCATCAACAACGTCGAGACGATTCGCGCGCCGCTTTTCGTCCTCCACGGCGAAAACGACCCG
CHR	749624	Fwd	231.96	e111	749624	0			HVO_0830	139	CIM							5.57		-28	CGCGGACGACTGAGGCGGACCTACCTTATTTTCCGTTAGAGTCAAAGCGCGGGACATCGAATCCCCGTCTA
CHR	750580	Rev	20.2167	e111								aTSS	HVO_0831	0831n				5.98		-28	GCGCCCTCCATGTCGGCCTTGTTGACGACGAACACGTCACCGATTTCGAGGATGCCCGCCTTGAGCATCTG
CHR	751246	Fwd	11.1	e111	751246	0			HVO_0832	308	GEN										CGACGTTTGCCCCGCCCACCATCCCGCCACGGGCGGGCGAATTAAGGCCACCGCGCGCTATCTACGTGACA
CHR	754108	Fwd	115.893	e011	754108	0			HVO_0836	435	MIS							5.2		-27	TCTCCGTCGCGTCACCGCCGCGTTTTCGACCCATCGCAACGGTTACCACGGTCCCGCGAGACGGTCCACTA
CHR	755526	Fwd	45.6133	e111			755559	33	HVO_0837	243	COM							6.21		-27	GCCCGGCTCGCGCCGCCCACCACCGGACCGAACCACGAGGGCTTTTATTCGCCGCGGCGTAGCACGGGACG
CHR	756845	Rev	97.1633	e-01	756845	0			HVO_0838	147	CHY							5.97		-28	GGTCGCGCTCGGCGCGGTCTCCCGCGTCGGATTGGAAAAACTCTAATGAGTCTCGCCCCGACGGTCCTGTA
CHR	757759	Fwd	13.3	e1-1								aTSS	HVO_0841	0841n					4.06	-26	TTTCGGCGGGCGAAGCCGGTAGTAGCGGCGGTTGAGGTTGTACATATACCCCTCACGCATCGTCTTCAACA
CHR	759264	Fwd	17.26	e-11								aTSS	HVO_0843	0843n1					3.18	-27	GTGAGGTCCTTCTTTTTCATCCAGGCCTTGTGGTCGTAGTCGTCTTTGCGTTCGAGACTCATTGTTTATCG
CHR	759616	Rev	146.76	e101								iTSS	HVO_0843	0843n2				5.35		-28	GAGTCCCCAAATACGGGTAACACCGGAGGTGGCGAATAATGTCTTCGACCGGCAGCACATACGGTGACATT
CHR	760310	Fwd	4.88667	e--1								intergenic		0844n					1.6	-26	GCGGCTGTCGCACCGCCAGCCGTTCGGAGAAACTCCCGCCTTTTCATACGGTCGTTCGTCAGGTTGGGACG
CHR	761445	Fwd	47.22	e010	761446	1			HVO_0847	160	CHY										GCGTGGTCTAGCGCTCGAACGGGACGCGGCGCATCGGTCCCTTTAGGCCGACCGGGTTCTAACGCCGTGCG
CHR	761536	Fwd	53.94	e1-0								iTSS	HVO_0847	0847n					2.81	-28	CGCCACGCTCGCCGCGATTACCGTCACGGCCAGCTTCCCGTTTTACCTCTACGGCGCGTGGATAATGATCG
CHR	762326	Rev	15.7867	e1-1								iTSS	HVO_0848	0848n1							GCCGACCAAGAGGAGCTGGCCGACGACATCAGCTCCATCACCTACTACAACAACAAGGCGAAGTACATCCG
CHR	762358	Fwd	9.58	e1-1								aTSS	HVO_0848	0848n2							CGCCGTCGTGTTTCTCGATGATGTCCGCGCAGGCGGAGCGGATGTACTTCGCCTTGTTGTTGTAGTAGGTG
CHR	762725	Fwd	41.5433	e111	762725	0			HVO_0849	44	CHY							7.77		-28	GGTGGTCGCCGCGGCGGTCGTCGGAGCCGAACCCAGACGATTTATGATTCACGACCGCGACCGACCGAGTA
CHR	763548	Fwd	123.75	e111								aTSS	HVO_0850	0850n					2.31	-27	CCTCACCGATGAACTTGTGCACCAGCTCGGAGCCGGCCATCTTGATGAACGAGGCGTTCGTCTGGTTGGCG
CHR	764157	Rev	868.77	e011	764156	1			HVO_0850	405	CP								4.53	-28	CAGACGCCCCCTAGGCGGCGAATCCCTCACACACCCGAAGCCTCTTATGAACCTGCACCCTATGCCGGATG
CHR	764325	Fwd	233.187	e110	764328	3			HVO_0852	89	REG							7.66		-28	TCACACAAATTCCCATCAGTAATAAATCTGGATAGCAAATATTATCTAATAGCATTGCTTGGTGTATCGTA
CHR	764570	Rev	46.4033	e111								aTSS	HVO_0852	0852n					2.63	-27	GGAGCGGGCGAAGACATACGGCGACGTGGCCGCGCGTTCGGATTTAAATGTTGAGCGTGTAGAGGCGCTTG
CHR	770025	Rev	56.6233	e111								iTSS	HVO_0856	0856n							CGACGCGAGCGTGACGGACGACGAGCGACGCGAGGGAACAGCCACGGACGCGGCCGACGAAGACGACGACG
CHR	770085	Rev	23.0033	e011	770085	0			HVO_0856	185	CHY							5.55		-28	GCGCCTCGACGACTGCGCCTGACTCGGCCGAAACGGACACTTTTTCTCGGCACGGCGTCTCGACGCGAGCG
CHR	770324	Rev	76.3033	e111	770319	5			HVO_0857	61	CHY							9.66		-28	CCCGGCGTTTCCGCGAACCGCACCCGGAACCACGGAAAGACATTTATCTATGTATGTCATTCCTTGTCATA
CHR	772815	Fwd	21.0267	e010								iTSS	HVO_0858	0858n1							AACGCGAGTACGAGGACGGACGGAGCGTCGGGAGCGATAATTCGATAACGAAGCGGAAACAAATCCATGCG
CHR	773369	Fwd	14.87	e110								iTSS	HVO_0858	0858n2							CTCGTCGAAGGCGATGGATCTCGCGAATTCCCACGATACACCGAAGCGTACGCACAGCGAAACTTCGACTT
CHR	773470	Fwd	37.15	e011								iTSS	HVO_0858	0858n3							TCTCTCGATGTTGCTCACGCAACGGGGGCAAAAACACTCGCTCAAGTATCGGGACAGTAAAGACTCGTACA
CHR	773664	Rev	7.29	e--1								aTSS	HVO_0858	0858n4					3.98	-28	CGCCCAACTCGTCGCGCGCGAAGTCGTCGTAGGCGGCGTTGATGTGCTCCTCGATGTCGAACGACTGCTCG
CHR	774365	Rev	17.4967	e111								aTSS	HVO_0858	0858n5					2.71	-28	CGGTCACATGAAGCTCCCGAGGCCGGTCTGTTCCTGTCCGCTTTTCACCTCGTCCCACGACATCCCGAGCG
CHR	776029	Rev	9.41667	e-1-								aTSS	HVO_0860	0860n				6.15		-28	GGGGACGCACTTCGTCATGAAGTACTCCTTGACGATGTCTTCGTGCTCCTGGACCGCCTGGTCCATGTTCA
CHR	777274	Rev	12.25	e1-1								aTSS	HVO_0861	0861n					3.02	-29	GAGGTAGTTCGTGTCGGGAGCGACGACCGAGCCGAAGCGCTCCTCGATGAGGTCGCCGTACTCGGAGAGCG
CHR	778308	Fwd	375.443	e011			778355	47	HVO_0862	163	CHY								3.41	-28	GAGCGTTTTTCCCCGATCCCGTCGACCCGCGAGGGAACCGCTTAAGTCGGTTACTCCCGGAGAGGTGTGTA
CHR	779714	Fwd	10.91	e--1								aTSS	HVO_0864	0864n1							AGCGGCTCATCGGTGTTTCGCGGATTGTACGGCGCAACGGGCACGACTCCTGCGTCCAGCAGGAAGTCGTG
CHR	779721	Rev	75.26	e111								iTSS	HVO_0864	0864n2					2.13	-28	GCGTCACGCGTGACGCGCTCGCCGTCGACACTCCGATCTGGATAATTGGCGACAGTGCCTACGACACACTC
CHR	780344	Fwd	12.9867	e--1								aTSS	HVO_0864	0864n3					2.63	-26	TCAAGATGTTCAAACAACGGAACTGTCTCGGTGGCCGCTGCTTTCAAAAACTCGTCGAGCGAAGCAACGTT
CHR	780402	Rev	276.993	e10-			780371	31	HVO_0864	332	ISH								3.64	-28	CTGTTGCTAGCTGTTTGCCACAGGACGGGCACTCGATAAAATAACATCACTAGAGCGTGTCATAGAAAGCG
CHR	780522	Rev	21.6533	e--1								aTSS	HVO_0864A	0864An1					3.02	-28	ACTCTTCGCAGTAAACACGCTGAGACTTTGGATCGTAAAACTCCTGATGGCAGCGTTTACAGACTCGGTTA
CHR	780581	Fwd	15.8333	e-11								iTSS	HVO_0864A	0864An2							ACACCGCTGCCTAACCGAGTCTGTAAACGCTGCCATCAGGAGTTTTACGATCCAAAGTCTCAGCGTGTTTA
CHR	780717	Fwd	77.6	e--1								iTSS	HVO_0864A	0864An3							AGACGTGCAGCGTTTGCGATGCTACGTTTTCCTACTACCCATCAAATAAGCAGGGTGTTTACTGTTCAGAG
CHR	780945	Fwd	21.54	e101								iTSS	HVO_0864A	0864An4					1.52	-30	GGAAGTGGCTCTCTAACAACATTGTTGGCTCGAACCACCATTAATGGGAAGGCGGAACCCTCTTTTATAGA
CHR	781197	Fwd	516.85	e-10											HVO_0864T	781200	3	7.55		-28	CTTGTCACCGACTCGTAGAAGGTGGAGACAAAAAGTAAGGTTATTGTGCCGGCATCACCCAATTTCAGATG
CHR	782532	Rev	3.24	e11-								iTSS	HVO_0866	0866n1							GTCCTCCTCGACGAGTTCGACGCCGAGACGACCGGTAACCAACTGTACGCCGACCACGCACATCTCGACTG
CHR	782567	Fwd	8.55667	e--1								aTSS	HVO_0866	0866n2							TCCGGAGGTCGTCGCCGTCGAAGCGGTCGTAGGCGCAGTCGAGATGTGCGTGGTCGGCGTACAGTTGGTTA
CHR	783212	Fwd	57.58	e111								iTSS	HVO_0867	0867n					4.55	-28	AATCAAAGAGTCGGCGGTCTCCGACGCCGAGTTCGAGGATATGAAGCGTTTCGTCTCGGACTATCTCTCTG
CHR	784856	Rev	10.64	e1-1	784856	0			HVO_0868	329	GEN								2.21	-28	CGGCGAGCGGGTTCCGGCACCCGCAACCGATTCTCTCACGTTTTTCACCGCGCGCGCCTTCGACCGAGACA
CHR	785072	Rev	5.99	e--1								iTSS	HVO_0869	0869n1				5.53		-28	GCTCGACGACTGGCAGTCCGTGCTCGGAGACTTCGTGAAGGTGATGCCCGACGCGTACGCCGAGGTCATCG
CHR	785496	Fwd	12.61	e--1								aTSS	HVO_0869	0869n2							GGACGCCGAAGCGCTCGCCGGCGAGGCCGTTGACGTAACATTCGCCCTGCGTCGCGCCGTAGAGGGCGACG
CHR	786870	Fwd	2.86667	e--1								aTSS	HVO_0869	0869n3				6.2		-28	CGGAGTTGGACTTGCCGCCGATGCGGTTCATGGCGATGGAGTTGTTCTCGTGGGCCTCCGGCGAGAGGCTG
CHR	789239	Rev	16.0033	e1-1								iTSS	HVO_0869	0869n4				6.76		-28	CGGGGACGGGGCGGGTATCCTGCTGCAACGACCCGACGAGTTCTTCGAAGCCGTCCTCGAATCCGAGCTTC
CHR	790077	Rev	11.99	e--1								iTSS	HVO_0870	0870n					2.91	-28	CCGCGTCGAACTCGACGCCCGCGACGAGCGCAACCCCGGCTTCAAGTTCAACGAGTGGGAGCTCAAGGGCG
CHR	791235	Rev	15.4367	e111			791124	111	HVO_0870	488	TL										GCTTACAATTGTGTCCATTGTTAGCACGCCAACCACCACGTACTGGTAGGATAGCCGGCGATATGTATCTA
CHR	792378	Fwd	680.99	e110											HVO_0873s	792379	1	8.79		-28	GTCGTCGGTCGGCCCCGAGACGCTTCGGCTTTGCGAAGGGTTTTATACTGGCGACATGGTACTGTCGGGTA
CHR	793434	Rev	20.4233	e111								aTSS	HVO_0874	0874n							ATGTCGGTCACGTCGCCGTACTCAAGCGGGATGGTGTGCTTGATGGCCTCGCGAACCATCTCGGACTCGTA
CHR	794548	Fwd	352.973	e01-	794549	1			HVO_0875	136	GEN										CGGACTGCGTTCTCCGTTCGGCAGTTATCCTGTCTATCTGGTATAAGTACCAGCAGGTCGATAGAATCTCG
CHR	795023	Fwd	104.57	e111	795023	0			HVO_0876	127	MIS								4.32	-26	CGCGTAGTCAACCCCACGAACGAACTTCGATTGGCGAACATTAATCAGTACTCTCGAACGAGTGTTTGCTA
CHR	796781	Rev	2.72	e--1	796781	0			HVO_0878	268	RRR								2.53	-26	ACTCGGCGCAATCGGCCGAGGAGTCGGCCGACGGGATGCGTTTTTCACCGCGCGGTCGTAACCTCCGGCCA
CHR	797276	Rev	60.8433	e011	797276	0			HVO_0879	141	GEN										GTTGCCAAGGGCATGTATAAATGGGATGTGAATCGTGGGGGCTAAACCGAGTCGGGTCGGATGCCACGTCA
CHR	797447	Fwd	39745	e111			797576	129	HVO_0880	307	CHY							8.96		-28	CGGTGTGGTAACTGTTTTCACCCGAATTTCCACCGAAGTATTTATTAACTGGTCGCTTGTATGTGTATGTA
CHR	797567	Rev	82.5267	e10-								intergenic		0879n							TTTCGTGCCTCGTCGAGTTCCTGCACGTCGAACTCGCTAAGTACTTCCTGCTTCGTTACCATGCGTAATCA
CHR	797596	Fwd	688.107	e001								iTSS	HVO_0880	0880n					1.65	-28	CGAGCAGCCGCCACGCACGGAGTGGTGATGGTATCGAGGATTGATTACGCATGGTAACGAAGCAGGAAGTA
CHR	799633	Fwd	52.92	e--1	799635	2			HVO_0882	378	GEN							4.91		-27	CCGACGACGGCTTCTCGTTTCGGTTCTGACGACTGGGAGGCTTTTTAGCCCGCGCCCCCGTTCGTCTTCCA
CHR	800691	Fwd	18.45	e111								iTSS	HVO_0882	0882n				5.05		-28	CGGGCGACTCGCGCTCACGCCGGTCCAGCGGCTGGCGATGTTCATCGTCGCCGGCGTCGTCGTGAGCGTCG
CHR	800914	Fwd	14.38	e111								aTSS	HVO_0883	0883n							GATGGCGAGACAGAGAGCCCCGAAGACGAGCATCGACGGCGTCACCATCATCAGGACCGTACTCGTCGCCA
CHR	800999	Rev	145.607	e110	800999	0			HVO_0883	63	CHY							5.12		-28	TCCCGGTTCGACTCTCGATTCGTCGCCCGGAGCCGCAACGGATTTGTCGAACGAGTCCCGACAGAATCCCA
CHR	801918	Rev	11.8767	e111	801918	0			HVO_0884	276	GEN							5.08		-28	AGGCCGTGAAAGCCGGAAATTCGCCCGCCCTTCCGGAACGTCTTTTCAACTCGCGGCCCTTGAATCAGCCA
CHR	803172	Rev	2.73667	e1--								iTSS	HVO_0887	0887n				7.09		-28	ATGGTCGCCGGTATCGGCTGTTCCGGGAAAATCGGGACGTACATGCACTCGTACGCCATCCACGGCGTCCA
CHR	805141	Rev	293.053	e101	805137	4			HVO_0888	586	CIM							6.98		-28	TTATTATCAGTACCATCGTTTAACACCAATTTTCAGAAGGCTTTTGACCCGGCTATGGGTAGATTTCACCC
CHR	805444	Fwd	19.8	e--1	805444	0			HVO_0889	214	GEN								2.21	-26	TTCGAGCCTGACTCCGGCGCGCACGTCCGGGAAGGCAAGGCCCTTGTGAGCCTGCGACCAACCCGGTCGCA
CHR	809818	Rev	38.9933	e111			809728	90	HVO_0892	641	TP							5.28		-28	CGCTCTCGACCCCGGGGCTTCGACGCACAGACCATCGCACATATCACCCCCGGACCGCTTAGCACCGGTTA
CHR	809951	Fwd	85.4567	e101	809951	0			HVO_0893	566	CIM							5.22		-28	CGAGAGCGAACCGCTTTCAGGGCCGACTTCGACCCGAATCCTTAATCATCATCCATACTGATTGGTGGACA
CHR	811833	Fwd	42.71	e001	811838	5			HVO_0894	662	LIP							6.67		-28	CGTGCCGAAGTTCCCCACGCGGACGACTGGACTACATAGATTTATCATGGAGGATTGGTGTAATTAGCACG
CHR	813120	Rev	39.5567	e101								aTSS	HVO_0894	0894n1					1.35	-31	GATGCCCGGCAGCGGCGGCCCGGCGGAGCCGGGTTTCATCTTCTTGATTCCCGGGAGCGTCGTTATCATCA
CHR	813385	Rev	14.7433	e011								aTSS	HVO_0894	0894n2				7.06		-28	CCGAGACGTTGATGACGTCGTCGACGCGCCCGAGGATGGTGATATAGTCGTCGCCGTCGATTTTCGCGCCG
CHR	813742	Fwd	27.86	e01-								iTSS	HVO_0894	0894n3							TCGTGTTCACGCCGGAACTTCCGAAGACGCGGTCTGGCAAGATTATGCGTCGGCTCCTCGAAGAGATTGCG
CHR	814101	Rev	12.57	e11-	814101	0			HVO_0895	81	CHY							6.02		-28	CCGCGGGAGACTATATTACTACACAAACTATGCAGGAAAATACCTTATTCGTGGAGTTCGTAGCGCGCGTA
CHR	815860	Fwd	61.58	e-01								iTSS	HVO_0896	0896n							GAAGTCGAGTTCGTCACCGAACTGCCGAAGACCGCGACCGGGAAGGTTCAGAAGTACGAACTGCGCGAACG
CHR	816981	Rev	47.2833	e111			816833	148	HVO_0898	64	HY							9.08		-28	AGTTATGTATTGATTCCCTAATATCTGTGTAATCAATCATTATATATTGGTGGGATCTACAACATGATATA
CHR	817738	Rev	15.59	e111								aTSS	HVO_0899	0899n1				5.27		-28	ACGCCTGCTGGGTCTGGCCCCAGCTGTAATCGGCGTAGAGCTGATAAAACTGCAAACCCTCGCCGTAGGCG
CHR	818364	Rev	9.05333	e01-								aTSS	HVO_0899	0899n2					4.21	-28	CGCGTAGCCGAGGTCGTCGCGGCTGGTGATGTTGACGATGTTGAAGTACGTCCCCTCGCTCTGCTCGGAGG
CHR	820404	Fwd	67.1233	e111								iTSS	HVO_0901	0901n				5.62		-28	TCATCATCTCTGGCGCGTTCGCCGGCATCGCCGGGAGCCTCTTTACCATCCACGGGGCGTACGTCCCCCTC
CHR	822304	Fwd	19.1367	e111								iTSS	HVO_0905	0905n							ATCTGGGGGTTTGAGGATGGCTGCGACCGACATCGACGCCGACCCCGAGACCGCGCTCGAAACGCTCATCG
CHR	823640	Rev	134.76	e101	823640	0			HVO_0906	84	CHY							6.34		-28	GGTACGCCGGGGCCGCCGACCCGACGAGCCGAACGGAAACCCTAACAACGTCCGCTCCCGAACGTCGGCCG
CHR	823746	Fwd	1042.78	e110	823746	0			HVO_0906A	27	CHY								3.01	-27	CGTTCGGCTCGTCGGGTCGGCGGCCCCGGCGTACCGATGCACCTTTTGCCGCACGCGCTAAGGTCGGAGTA
CHR	824310	Fwd	172.87	e111								aTSS	HVO_0907	0907n1				5.8		-28	CTTGCGACCTTCGAGCCACGACTGGACGAAGTTCCAAACGAATATCATCTGTCCGACGAGCAGGATGAGCG
CHR	825212	Fwd	15.2133	e1-1								aTSS	HVO_0907	0907n2					3.54	-28	ACGAGACCTTCTCGTCACGCTCCGTGAAGATGGTCGCAATGAAGTTGATCGCACCCATCGTGGCCGAGACA
CHR	825853	Rev	1127.36	e001	825853	0			HVO_0907	599	EM								3.68	-28	CGGCTTAAAGCACCTCGAATCGCAGGGCGGTCCCGAATCTTTCATTACCCTGCACTACTCAGTCACTTCCA
CHR	826275	Rev	357.83	e011	826275	0			HVO_0908	119	CHY							6.36		-28	CCGTTCCCACTCCCCACAGTCGGACGAGAAACCAACAATCTATTTGAACGGCGTCCCCGAGTGTCTCGATA
CHR	826743	Rev	58.1233	e111	826743	0			HVO_0909	121	CHY								1.69	-27	CCGGCAGGGTATCTCTCTCCGCTAGTCTCGGTTCCGAAGGGCTTGTTACCACACAGTCCAACGGACGCGTA
CHR	827048	Fwd	4.12667	e--1			827150	102	HVO_0911	369	GEN								3.68	-28	CCGGGGGTCGGGCATCGGTGTTCATCGGGCGGTCGAAGGGGTCGTGTATAACCGTGCCGATACTTGTTTTC
CHR	827087	Rev	6.28333	e1-1			826992	95	HVO_0910	67	CHY								4.08	-27	AGTCCCATCGTCAACAGTTCCGCCGCGTCCGTCGAAAAACCCTTTCCTTCCGCGCGGCGGATTCCGCCGGG
CHR	827482	Fwd	128.76	e101								iTSS	HVO_0911	0911n1							GCGAGTACGAGTTCACGACGCTCAACGTCAACCCGGGGATGCTGAAGTACAAGGGCGCGAACATCCAGATA
CHR	827607	Fwd	54.0867	e100								iTSS	HVO_0911	0911n2					3.58	-28	GAGGTCCTCTCTGTCGTCCGCACCGCCGACATCGTCGTGTTCATGCTCTCGGTGTTCGAAATCGAGCGCTA
CHR	828786	Fwd	35.3467	e011								intergenic		0912n					4.7	-28	ACGAGCGCGACGCCGACGGCTCCTCGCGCTGAGCGCAACACACAAAACCGAACGACGCGTCCGCTCTCCTC
CHR	828842	Rev	8.87	e--1								iTSS	HVO_0913	0913n1							TCTACTTGGCGTTCTTCGCCGAGACGACGATTCCGGCGGTACTGAACTACTACCGGTTCAAAACCGGGACG
CHR	829662	Fwd	8.76333	e11-								aTSS	HVO_0913	0913n2							GAGCGCCGCCCCCTCCACGCCGAGGTCGAGACCGAAGATGAGCACCGCGTTGAGAACGATGTTGATGACCG
CHR	830369	Fwd	205.337	e111	830369	0			HVO_0914	259	GEN							5.89		-28	CGTGTGCCAACCATCGACGGTGGCTTCCGCGTTCGGTACGTTTTTCGCCGGCGCGACACATCACTCGGGTA
CHR	831017	Rev	8.78333	e11-								aTSS	HVO_0914	0914n					3.93	-27	GTGAACGCGAACATGTCGTCGCAGGACTCAGGGTCGCGGTAGTCTTCGGCCTCGCGCTCCATGAGCGTCTC
CHR	831305	Fwd	203.25	e111								iTSS	HVO_0915	0915n1				7.21		-28	CCGGCTCGCACCGGCAGTCGGCGTCCGGAACGGCAAGGGATTTAATCGGTCCACCGCATCCAGTACGTATG
CHR	832074	Fwd	51.06	e110								iTSS	HVO_0915	0915n2							TCTGTTCCTCTTCGGCTCGTCGGACCCGTACATGGTGTCGTTTTTCATCTCCGACCGCATCATCAGTCAGG
CHR	832925	Fwd	12.2833	e--1								aTSS	HVO_0916	0916n							GTTCGACGCCGGCGCGGTCGCGGACCTCGATGTCGATATCGTGGTAGGCTTCGAGTTCCTCGACGGTCGCG
CHR	833044	Rev	13.3667	e11-	833044	0			HVO_0916	269	MIS							5.61		-28	CTCACGCAATGGTATCCGTCGTTCCGCCGAGGGTCACGCCGCTTATCACCGACGGCGACAGAACACGGACA
CHR	833159	Fwd	60.7833	e001	833161	2			HVO_0917	191	GEN										CGGAACGACGGATACCATTGCGTGAGATTACCCAACACACTATTGTAGTTTGCCGGAAAATATTTCCTCCG
CHR	833823	Fwd	195.717	e101	833824	1			HVO_0918	69	CHY								2.66	-28	ACCGCTTTTTTCGCCGTCCTCCGCGGACTGACCCGACGGAACTATCTCGACTGGCGTGTTCCCTTCGAGTG
CHR	835405	Fwd	164.447	e10-	835405	0			HVO_0922	388	ISH							8.32		-28	GGACGCGGTGCGACTATGAGTCTCAGTACCTCACAAAGCCGTTTAGTTAGAAGGTCTGCTTGCTGAAGATG
CHR	835428	Rev	168.06	e01-								aTSS	HVO_0922	0922n1				10.29		-28	GTGAGAGAGCAACTTCCTCGTCAAGAGAGTTGACGAGGAAGTTAAGGAGCTGGTCCTCGTGGATTTCATCG
CHR	836591	Fwd	17.1367	e--1			836669	78	HVO_0924	450	ISH										GCGTCGGGCCGTCCCCGCGAACCGACCACCAGACGACCGGTTCCACCGGTAACTCCCGACCGGGCTAGCCA
CHR	836607	Rev	24.15	e11-								intergenic		0922n2					4.22	-29	ACTTCCCACCGGGTTTCTCAATCAGGTAGTTGCGACGATATCAAATCAACAGACAGCAACTGGATTCTTCG
CHR	836696	Rev	51.0167	e01-								aTSS	HVO_0924	0924n1				7.41		-28	GTTGCGCGAGCGCGCTCGCGCAACTCATCAGAGGGAAACGCTCTTTGAATCCGGTCAACTATGACCGAATC
CHR	837521	Rev	46.5667	e110								aTSS	HVO_0924	0924n2							TCGGGCGCGCTGTAGCTTTCTCTCGCCAGATTCGTCAGATACAGATGGTACTCTTCGCTCTCCTTGTTACG
CHR	837755	Fwd	22.6933	e1-1								iTSS	HVO_0924	0924n3							CGGCTACATCATCGAGGCGCTGATCATCATGGCCGCAATTTCGTTGATGATGAGTCGTGTAATCGTGGATG
CHR	838207	Rev	164.167	e-11								intergenic		0924n4							ATCTCAAACGGCTCACCGGTGTCTTTGTCGAAGACGAAGTAATTACCGTGCTCCCAGACAGAATATCAGTA
CHR	838241	Fwd	13.2533	e11-								iTSS	HVO_0924A	0924An1					3.04	-28	GCTTCAGAGACAGCTAGCCGAGGATGCTTTGTGAGGTACTGATATTCTGTCTGGGAGCACGGTAATTACTT
CHR	838263	Rev	92.73	e111								aTSS	HVO_0924A	0924An2				10.84		-28	TAGTAGATGTGGTATTCTCTTTTGCGTGGAGATAGATATCTTCATCTTCAACCGTGATCTCAAACGGCTCA
CHR	838287	Rev	32.8467	e11-								aTSS	HVO_0924A	0924An3							CTAAGCTACAGAAATCGCGGAACGTAGTAGATGTGGTATTCTCTTTTGCGTGGAGATAGATATCTTCATCT
CHR	838480	Rev	12.68	e111								aTSS	HVO_0925	0925n1				5.44		-27	TGACAAAATTCCCGACAAGCCGATAGCCTAAATCAAACAGCGCTTTGTGACCCGAGAGCCCATCGAAAGAA
CHR	838655	Rev	17.4967	e--1								intergenic		0925n2				6.34		-28	CTCTCGTCGAAACCGCCAGTCCAACCGCTCGGTCACAGAACTCATGCTTCAGAAACAGCTAGCCGAGGACG
CHR	839967	Fwd	112.543	e01-								aTSS	HVO_0926	0926n				10.29		-28	GTGAGAGAGCAACTTCCTCGTCAAGAGAGTTGACGAGGAAGTTAAGGAGCTGGTCCTCGTGGATTTCATCG
CHR	839990	Rev	429.137	e10-	839990	0			HVO_0926	388	ISH							9.18		-28	GTTGTTGATATTCGTTCCAGACTCAGTACTTCACAAAGCCGTTTAGTTAGAAGGTCTGCTTGCAGAAGGTG
CHR	840294	Rev	26.7567	e001								aTSS	HVO_0925	0925n3				6.67		-28	GTTGGATGCCTTCGCGAAGAAGTGAGTCAAGATCACTACTCTCAAATCCACCTTCCTCAATTTTAAGTACA
CHR	841004	Rev	91.9967	e111											HVO_0928	840985	19	7.82		-28	GGCTGGTGCCGACCGACAGACGCCGGGGTGATTCGCAAGTCTTAATTACGTAACCGGGGTACGGAAGAATG
CHR	841571	Rev	76.2467	e111								iTSS	HVO_0929	0929n1				8.14		-28	CGCGAGTACGGCCACGAGTTCCGCCTCGACATCGACACCGTCTACTTCTCGCCCCGACTGGCCACCGAACG
CHR	842126	Fwd	8.49667	e11-								intergenic		0929n2							GACGTTCATACCTCCACCACTACACGGCTCCGAGTAAGGGTGACGCTTCGCCGCGGACGTATATACTACCC
CHR	842176	Fwd	285.75	e111								intergenic		0929n3					3.79	-26	CCGCGGACGTATATACTACCCTGATGTATCAGGGACCAAGTATAGATGACTGGCGAGGAAACGATGATTCG
CHR	842909	Rev	3194.78	e--1			842875	34	HVO_0930	156	CHY								2.6	-28	CACCGTCTCGATTCCCGGCTACCGGGAAGGAAGAGCCCGCCTTATGTCCGGAGAGAGCGTATTATCTCCGG
CHR	843073	Fwd	5.01667	e-1-	843073	0			HVO_0931	142	GEN								2.86	-29	GAGGTGACGAGAGGCCGAACCCCGGGCGACCGGGTTCGGTTTTATTCGCTCGGCGCGCGTCTGTGCGGGTA
CHR	844610	Rev	9.16333	e--1								aTSS	HVO_0934	0934n							AACACCGCGGTGAGTTCGGCGTTGCCGTCGGCGGCGGCCGCGCCCGCGAGGTTCACGAGCAGGAAGCCGGG
CHR	847669	Fwd	10.81	e-11			847700	31	HVO_0935	680	MIS										GTCCACCGGCGATTTTTACCCCGTCGCAGTCGGCGGTACGATGAATACCGTTCGGGTCACACGTTCGACTA
CHR	850758	Rev	10.0767	e--1								iTSS	HVO_0937	0937n				5.4		-28	CGGTCGACTCCTGTTCCGACTGACCGACGACGGCGAAAGCGAGAAGTTCGCGTTCATCGAGGAGACGGAGG
CHR	850977	Rev	30.66	e111	850977	0			HVO_0937	146	GEN										TCGCCCCGACGCCCGGGACCCCGCCGCCGTCGCACCACCGTTTCATGTGTCGCGGCCGCGAACGTCACGTA
CHR	851879	Rev	117.187	e100	851878	1			HVO_0939	106	CHY							6.06		-28	ACTGAGTCGCCTTCCCGAGACGCTCGCCGAAAGCGGACCAGTCAAGTCGCTCCGTCTCGTCGGGAACGATA
CHR	855442	Rev	595.597	e110	855442	0			HVO_0942	72	EM										ACGCAACTCCCCATTCCAACGCGGTGGGAATGGGCGAAATCAGAAACACCGTGGTCGCGAATGGACCGGTA
CHR	855542	Fwd	2464.8	e111	855542	0			HVO_0943	97	EM										GATTTCGCCCATTCCCACCGCGTTGGAATGGGGAGTTGCGTTAAAGTCCCGTTATTCCTCATGACCGAGTA
CHR	855657	Rev	14.6067	e--1								aTSS	HVO_0943	0943n1							CGGGTCGAAATCGTCGTGTCCGAGTTCGCGAACGATGCCGTCGTCGGCCGTCCCGACGATGGAGTCGACCG
CHR	855751	Rev	8.36333	e1-1								aTSS	HVO_0943	0943n2							TGAGGCCCCGTCCGAGGAACTCGACGAAGTACATGAACACCCACATGCCGATGAGAATCGCCATGTAGATG
CHR	857918	Rev	15.3133	e111								aTSS	HVO_0945	0945n							CACGACGAGCACCGCCGCGATACCGGTCCACATCGTCAGGTTGTCGAGGATGCGCGGGCTTCCCTCGGGCC
CHR	858513	Fwd	642.627	e110	858517	4			HVO_0947	73	CHY								1.49	-30	GCCCGGTCAGTTTCCCGGACGCTGGGAAGCAGTCTCCGTTTATATTCGGTCGTCTCGCCTACGTCTAAGCG
CHR	859729	Rev	6.79	e--1	859729	0			HVO_0949	133	CHY							6.25		-28	CGGCAGTCGCATCCTCGTGAGTGAGCCCGAGAGAGACTAATTTTTTGACAGTTCTGTGCGAACTACGACCG
CHR	859876	Fwd	34.5633	e010	859880	4			HVO_0950	219	CIM								4.08	-27	CCCCCGTCGTGCGACCGAAGCGATGCCGGGAGGCCCCCAATTTAATACTATATGTAGTAAACGTCGAGACA
CHR	861039	Rev	16.04	e--1								iTSS	HVO_0951	0951n1							GAGACGCCTTCGTCGCTGTCGAGACGACGGAGATTGATGAATTAAAGTGGACGCTCCGTCGAGAACTGGTG
CHR	861307	Fwd	22.78	e011								aTSS	HVO_0951	0951n2							ACCACTCTCAGTTTGCCAGTATCCGTAGCCACCCGCAACGATGAGTAGAATTCCGACGATACCCCATACCG
CHR	861429	Rev	20.7867	e--1								iTSS	HVO_0951	0951n3							CCCAAGAGTCTGACTTAGAGATTAAAAGCGAAGACGTAGGCCAGAATACCGGGGTAGTAAAAGGTCGGTTG
CHR	861584	Rev	34.14	e001								iTSS	HVO_0951	0951n4					2.72	-28	CATGATAGACTTTAACAGACAAGGCCTACGGAAGGCAACAAAGTTCGTAGAGGGGGATTATAGTGGAATCA
CHR	862538	Rev	17.2867	e--1	862537	1			HVO_0952	231	MIS								3.12	-26	AGACGCGGACGACCCCGAAGAATCGAGCGACGAGCGGGATGCTATATAGAGTCGGGACGAAACGTAATCCA
CHR	866871	Rev	27.7367	e011	866869	2			HVO_0957	41	CHY							9.67		-28	TCTATATCTACGTTCGAAAATATATATTCTGTGCGACATGTTTATCATCTCGCTCCGGATGCATCCACGTG
CHR	866946	Fwd	31.1333	e11-								intergenic		0957n							GGATGCATCCGGAGCGAGATGATAAACATGTCGCACAGAATATATATTTTCGAACGTAGATATAGATACTC
CHR	867422	Rev	7.42667	e1-1	867422	0			HVO_0958	148	CHY								2.31	-28	GAGGCTGCGCCACCCGCCTCGCCCGCCCGAAGGTGAAACCTTCAAGCATCGCTGAACTAACCCGACGGACA
CHR	868340	Fwd	64.51	e110	868340	0			HVO_0960	281	GEN										CATCGCTCCGTTACCTGCGGCCGATTTCTCCCAACGAAACGCACAGGTGTCTGGCGACGAACTGTCACCCA
CHR	869824	Fwd	139.967	e111	869825	1			HVO_0962	124	GEN							5.03		-28	GACGCCGAGACCGCGGACGCCGACGAGGCCGACCCGGAGGGTTAATAAGGCTCTCGCCGGAGTTCTGGATA
CHR	870707	Fwd	6.88667	e1-1	870707	0			HVO_0964	141	EM							6.98		-28	CCACTCTTTGGAGATATTATTGCTCGAATTGTGCAAAACCGTTATTACGTCGCGGCCGATATCGGTAGGTA
CHR	871193	Fwd	50.9167	e111	871193	0			HVO_0965	492	NUM								3.17	-30	CCTCGCGTAAGCGTTCTCGGTCCCCGAGACTCGGGGTCGATTTATTGACTCTCTCGCCCGACCGTCGGGTA
CHR	874115	Rev	2.30333	e1--								iTSS	HVO_0967	0967n1				5.97		-28	CATCCTGTCGTACGAACTCTCCCAGCTCCCCGGCGACTCCTTTTTCATCGTGGTCGACGAGCGGCTCGACG
CHR	874341	Rev	32.25	e111								iTSS	HVO_0967	0967n2							TGTCGCAGTCGAATCAATTCGCCGGCATGAAATCGGTCAGGCTTCGCTTCACGCCCGACGACGAACAGTTG
CHR	880692	Rev	62.77	e010	880692	0			HVO_0970	414	CIM								4.68	-28	CCTTTCGCGTCGCGGGGCTAAAGGCGCTTCGGGATGCCGTTTTAAGCTTCGCGGGGGCGTAGGCGAGGCTA
CHR	880703	Fwd	10.9333	e1-1								intergenic		0970n							GAGGTCCTCGTCGGTCGGTTCGTAGTCGAGGTCGAGGAAGTCTTCGTACGTGATACCCATAGCCTCGCCTA
CHR	883226	Fwd	20.1833	e10-								aTSS	HVO_0972	0972n							TCTGGTTCGTCGTCCGCAAGAGACGCACTATCACCTGAACCGTTTTCTGCACCGGTAACCGATACTGAGAG
CHR	883558	Rev	28.4633	e01-			883490	68	HVO_0972	173	MIS										TGCTAGCAATGAACGTCATTTTTGTTGTCTAATACTAGATTAGATTTATGTTCGAGAGTGCCCATGTAGCA
CHR	883581	Rev	8.97667	e--1			883490	91	HVO_0972	173	MIS							8.47		-28	TCGTGACTTCCATCTGAACTGTGTGCTAGCAATGAACGTCATTTTTGTTGTCTAATACTAGATTAGATTTA
CHR	883914	Fwd	11.7	e111								aTSS	HVO_0973	0973n1					2.22	-28	GCCCTCGCACCACGCCTGGTCGTCGTCGTCGACGGGGAGCATCATGTAGAACGCGCCCTTCGGGACGGCCA
CHR	884174	Fwd	6.75667	e111								aTSS	HVO_0973	0973n2					4.05	-27	GGGCGTGGAGGTAGCCGAGCCGCCAGCCGGTCATCGAGAACGCCTTCGAGAAGCCGTTGATGGTGATGGTG
CHR	885121	Rev	6.53333	e11-								iTSS	HVO_0974	0974n				6.86		-28	GCGACGCGGCCGCCGAGCGCGACGCGGCGGTCGTCGAAACGATTCAGGTCCCCGGCGCGTACGACTCGCCG
CHR	885261	Rev	11.0067	e--1	885261	0			HVO_0974	134	COM							4.98		-28	CTTGCCCGTCGCCGGGGCCAAATTCGGTCGGTGTCGGTAGTTCTTTTATCCGAGACGGGAAGGGTCGGTCA
CHR	888557	Fwd	10.8533	e--1								iTSS	HVO_0977	0977n1					4.34	-27	ACGCCGACCGCGACCCCGAGACGACGCCCGACGTGGGCATCATCATGGGGTCCGACTCCGACCTCGACGTG
CHR	888603	Rev	35.2533	e111								aTSS	HVO_0977	0977n2					3.92	-27	GTCCGGTGTGCGGAGACGACGTACGTCTCGTAGGAAAAGCGCTCTTCGGGCGGCGCGTCGAAGTCGGTTTG
CHR	889229	Fwd	22.62	e1-1			889252	23	HVO_0978	138	EM										ATTTTCCAAATAGAAGCCCTCTCGCGCCCGAAACACACAAATCAATGTTTATAGGGGAGCGCTTCTAACCG
CHR	889388	Rev	37.4233	e010								aTSS	HVO_0978	0978n				4.89		-28	GAATACGAGGAACAGCAGCGCGACCATGTAGTACTGAATGTTAAACTGGACGCGCGCCGTACCTGTCGGCA
CHR	890002	Fwd	30.2067	e--1								iTSS	HVO_0979	0979n							GCCGGGGTCCCGCGTGCGTCGCCGCGGCAGGCCGACGTGATTATCGTGCCGGGGACCATCGTCTCGAAGTT
CHR	893384	Rev	49.37	e111								aTSS	HVO_0982	0982n				9.78		-28	ACGGGACGTTCTTGAGCTGTTCTTTGTTGTAGACGAAGTCGTTTTTCGTGTCCGCCGTGAACTCGAAGTTC
CHR	893648	Fwd	82.7433	e--1	893649	1			HVO_0983	86	EM							7.86		-28	CCCGCGTCCGCTACCGGACGCTGAGGACGTTCTCGAAATGTTCAAAGGGATATCTCAAGGAGACACACACA
CHR	894047	Fwd	15.3233	e--1								iTSS	HVO_0984	0984n							CGTGATGGCGGTCGTGTTCCTCGGCGCGTCGTTCCCGAACCCACAGGGGTTCCCGGAGGGAGCAAACATCA
CHR	894566	Rev	21.5767	e111								aTSS	HVO_0985	0985n					2.2	-28	GAACGAGAGGAACGGGAGGAGGACGATGGCCGGAGCGAAGTCTAAGATACCTGCCATAGATTACCACCTCA
CHR	895687	Fwd	14.87	e1-0								iTSS	HVO_0986	0986n1					2.39	-31	CTACGTCGCCTCGACGTTCCACCTGCTCACGCACGCCTTCTTCAAGGCGCTTCTGTTCCTCGGTGCCGGTG
CHR	895719	Rev	14.4733	e--1								aTSS	HVO_0986	0986n2					2.89	-30	CGAGCGAGCCCGAGAGGAACGCGTAGTACGTCACGGGCATCTTGTCTTTGAGGCCGCCCATGTCCCACATG
CHR	896398	Fwd	62.9967	e101								iTSS	HVO_0986	0986n3				7.63		-28	GGACAAGCTCGGGAGCATCAAGACCGTACTGTACAACAACTACTACCAGGACGAGTACCAGGTCTGGATTG
CHR	898949	Rev	28.8333	e111								aTSS	HVO_0988	0988n1							GCAGCGACCAGTCGACGCTCCCGCCGCCGATTTCGGTGACGGTTTCCAGGGGGAACGCGACGGTGAACACG
CHR	899015	Fwd	15.83	e1-1								iTSS	HVO_0988	0988n2					1.6	-27	TCCGCGTGTTCACCGTCGCGTTCCCCCTGGAAACCGTCACCGAAATCGGCGGCGGGAGCGTCGACTGGTCG
CHR	899121	Fwd	19.9633	e110								iTSS	HVO_0988	0988n3							GCTCGGTAACTTCGCGGCGGCGACGCAGAACAACGTCAAGCGGATGCTCGCGTACTCCTCTATCGGTCACG
CHR	899253	Fwd	24.4967	e111								iTSS	HVO_0988	0988n4				5.47		-28	CGTCCTCGGCGCGAGCATGGCTCACCTGTTCGTCTACGGCTTCATGAACACGGGCGCGTTCCTGTTCATCG
CHR	900172	Fwd	19.2433	e111	900172	0			HVO_0990	486	GEN							5.5		-28	GCCATGACATAATATCATCGCTGGATGGGAGGACGGTAGGGTTTTGCGGCCGGAGTTCGACCGTCCGTGTA
CHR	901910	Fwd	9.72	e1-1								iTSS	HVO_0991	0991n				6.55		-28	CGATATCCTCCTGTCGGCGGACGACGCGCCCATCGAGACGGTGATGGCGACGGACCTCGTCGTCGCTCATC
CHR	902693	Rev	31.4	e001	902693	0			HVO_0992	75	CHY								2.43	-27	CGCGGCGATGGCCGACGCCTCGACGCCGGTGGATGGGTAGACACTTCGGGCTTCGCGGCCACTCACCGGTA
CHR	902995	Fwd	22.2167	e100	902996	1			HVO_0994	437	TP							5.65		-28	TAATCACCGCTTACTGTCCGAGACGGACGGTATCGGTGTGGTTATTCCACGCCGCGCCAACGGAGGAGACG
CHR	905461	Fwd	4.61	e1-1			905599	138	HVO_0996	367	GEN										GCTTTCCAACTCATGGCCGACAATGCGACGCCCCGCGAGATAAAGCTGTTCGAGCGCTAAGGTGTCTCTCG
CHR	906798	Fwd	41.3833	e111	906798	0			HVO_0997	368	MIS								2.71	-27	GCCGGTGGTCCGCGACCCGCCGCGCTCGCGGACCGCCCACGCTTTTCCCCCGGCGCTCGTATCGACTCGCA
CHR	907962	Fwd	256.853	e111	907962	0			HVO_0998	62	CHY							5.4		-28	CTGGCGCTGCTGACCGGGCACCGGTAACGTGACCTGGAACTATTAACTTCCTGACCACCGTAGCGGGCGTA
CHR	911459	Rev	1122.99	e111	911458	1			HVO_1000	697	CIM							5.78		-28	TCGTGCCACCAAAGGCCGTGAGAGCGCCCACACCACCGAGTTTATCAGTCAATGACGGGAATCAACAACCA
CHR	912064	Rev	60.4667	e110								intergenic		1001n							TTGCGGGTGGAACGTCGCGCTCCCCCGAAGTTAGTTAAGAATATAAGAACTGTGAATAAAATTGTCTCGTA
CHR	913053	Fwd	17.7533	e111	913053	0			HVO_1003	265	TP							8.52		-27	AAATATTTAGGCAAGCCAAAAATATCTGGTATATGATAATACTTATCGGCGCCGAGTGGCTACGTTCGGTA
CHR	914231	Rev	9.07667	e-11	914231	0			HVO_1004	94	CHY										GCGCTCCCCGAGGGCGTCCGGCGCGCCCGCAAACTCAAGCCTTAACCCGCGGCCGACCCCACGTGGTGGCA
CHR	916070	Rev	5.87333	e1-1	916070	0			HVO_1006	317	TP								2.43	-30	ACCGCCCCGCGACTCGAATCGAGCGGCGATTCCGAATCCCTTACCACCCGATAGTGACGACGGGTACGACA
CHR	916814	Rev	9.29333	e11-								aTSS	HVO_1007	1007n					2.82	-28	CCTCGTCGTTCGCGCCGCCGCCGTCGCCCGTGGCGACGTAGAGATAGCCGTCCGGGCCGAACGCGACGGCT
CHR	918638	Rev	11.2233	e11-	918638	0			HVO_1008	332	GEN								3.46	-28	ACACGAGCCACCCGGGCAGCCCTTGCGACTCGCCCGCACGCTTTTGCGGCTTCCGAACGACTGATACGCCA
CHR	918994	Fwd	157.613	e111	918994	0			HVO_1009	340	GEN								1.91	-28	ACCGACGAACAACGCTGAACCGCTCGCCGCAACTCACACGCTTTAGTCGCCGGCCGTCGTGGCATCGACCA
CHR	919182	Fwd	7.63667	e11-								iTSS	HVO_1009	1009n							CCCACGAACTCCTCGACGCGTTCGAGGAGCGCGGCGGGAACTTCATCGACACCGCCAACGTCTACGGGAAC
CHR	920722	Rev	43.5567	e111	920722	0			HVO_1011	77	CHY								2.05	-28	GTAGTGACGGTCCCAGGAGCGCTCGCGGCCCGCCCCCTCGCTTTTACGCGCTCGCCGTGAACGTCCGGTCA
CHR	921796	Rev	6.64667	e11-								iTSS	HVO_1013	1013n							CGACGTCGGCCTCGGCGGCGTCGTCCTCGCCGTGGTCATCTTCATGTGGACGCCCGCGCACTTCTACAACC
CHR	922893	Rev	30.0067	e-10			922882	11	HVO_1013	468	COM										CGGGGAGCGACGCCCGAACGCGAGGCGGAAAAGCGCGGGTCCTAAATACGGGACGGTCCAACACGTCCGTA
CHR	923011	Fwd	11.5333	e111			923045	34	HVO_1014	252	EM								2.49	-27	TCGCGTTCGGGCGTCGCTCCCCGTGATATGAGGGGGAGGGGTTGATAAACGGCGGGCCGAGAGTCGGTACG
CHR	923042	Fwd	33.59	e-11	923045	3			HVO_1014	252	EM								4.19	-28	GGGGGAGGGGTTGATAAACGGCGGGCCGAGAGTCGGTACGCATTTATGCGGTTGTTCCTAAGTCTCGCTCA
CHR	923438	Rev	12.09	e110								aTSS	HVO_1014	1014n							GGGCGGTCCTTGGGGATGACAATCTCGTTGCCGGACGAGAAGTTACCCTCCTCGGGGTAGTACATGTTCCA
CHR	924837	Rev	80.3033	e110	924837	0			HVO_1016	161	GEN								2.39	-28	GGCGGTTCCGTTCCGGCGACCGACTCGGCGTTCCGGAACCCTTAGATGGAGCGCCCGCGGACGGTTCGGTA
CHR	925666	Fwd	7.56667	e-10								iTSS	HVO_1017	1017n				7.1		-28	ACTGGCCTACATCGACTGGTTCGACGCCGCGGGCGACGCCTTCTTCGACGCCTACGACGAACGCCGACCCA
CHR	925901	Fwd	230.53	e1-0	925901	0			HVO_1018	633	GEN							5.87		-28	CTGTGCGAACCGGCCGCGCACGCGAGATGCTTTTGTAAAGCTTAACACTACCCCCTGACCTAGCGGGACTA
CHR	930882	Rev	60.8833	e001	930880	2			HVO_1020	419	GEN							6.71		-28	GGCGGTCGGTCCCGGCCCGAGACGCGGAGCGAAGGGAAACGCTCTTTTTACAGTCGAACGGACTTCCGGCA
CHR	933017	Fwd	15.5733	e111	933017	0			HVO_1023	271	CHY								2.28	-28	TTCGCCCCTCGAAACGCACCCCGCGTTCGCCCCTCGAACGCTTATCCCCGCGGCGACCCAACCGTGGGCCA
CHR	934539	Rev	12.5567	e1-1								iTSS	HVO_1025	1025n1				4.91		-28	CGAACCCGACGACATCGAGGTGGCGGAGCTCCACGATATGTTCACCATCCTCGAATTCCTCCAGTCGGAGG
CHR	934566	Rev	6.16	e--1								iTSS	HVO_1025	1025n2							GGAAATCGCCTACGAGATGGCCGACCTCGAACCCGACGACATCGAGGTGGCGGAGCTCCACGATATGTTCA
CHR	935421	Rev	46.97	e101	935421	0			HVO_1025	383	LIP								2.57	-27	TGATAAACGGTTTGAGACGTGCCGGCGAGGGATTACCCGGTTTTAAATCGCGCTGCGACGACGTGCGCGTA
CHR	935515	Fwd	5.49667	e--1	935515	0			HVO_1026	137	CHY										TTTAAAACCGGGTAATCCCTCGCCGGCACGTCTCAAACCGTTTATCAGTCGGTCGCCCGAACGACCGGCCA
CHR	936055	Fwd	3571.49	e111											HVO_1026R	936055	0	5.85		-28	CGACGGTGTCCCCCGATTTTCCCGCACCCGAGTCGAAAGGCCCTTAACAGTCGGTGGATAATAAGGGAGTG
CHR	936812	Rev	1179.45	e001	936811	1			HVO_1027	90	SEC							5.5		-28	GGACTACGGCGACTTCGAGACGCCGACACGGACCGTCTCTCTTATCTTCCCTCCGAACGTAACCGAACGTA
CHR	937425	Fwd	5.51	e11-								aTSS	HVO_1028	1028n1					4.6	-29	CATCCGTTTCGCGGCCGCCTGCGCCCCGAAATACACGCCTTTCAGGTTGATGTCCATCATCTGTTGGAACT
CHR	937924	Rev	57.87	e--1								iTSS	HVO_1029	1028n2							ATCGAGTGCACCGGTGTTGAGACGGACGGAGTCCGTCGATGCACGGTGCGAATAAAATGAGCACCGGTGGT
CHR	938556	Rev	16.34	e111								iTSS	HVO_1030	1030n1				5.57		-28	TCTTCGACATCACGGCGTTCGAGGCGGGCAACAGCGGGAAGTACATCCCCAAGCCCGTCGTGAGCGAATCG
CHR	938615	Rev	8.44333	e--1								iTSS	HVO_1030	1030n2							TAACAGGCTCCAGCTCGACACGGACTTCGAAGTCGGCAACGGCGAGTCCGTGGACTTCGTCTTCGACATCA
CHR	938922	Fwd	1.72333	e--1								aTSS	HVO_1030	1030n3				5.75		-28	CGTAGGCGACTCTCGACTCGCCTTCGGCCGCGTCGGTGTCGTTTACGTCGGCGGATTCGATGTCCGCATCG
CHR	939849	Fwd	11.0133	e--1								aTSS	HVO_1031	1031n1							GTCGAGCGCCTCGAACAGCGTCGTGTTGTAGTTCGAGCCGTACATGGCGAAGCCACCCTTGTACTCGCGGA
CHR	940091	Rev	4.22333	e--1								iTSS	HVO_1031	1031n2					2.3	-27	AGCGCCCCGAGCCGCCGCTGCCCCGCACCGGCAAGGGTCTGCATTACTGCCTCCACTGCGACGCCTACATG
CHR	940519	Rev	18.84	e111	940519	0			HVO_1031	342	MIS								1.32	-27	CACGTTTCGGGTGGATGCCGGCCGCGCACAGGTGATGTGGGCTTAAGAGCGCCGCGACGAATTCCCGTGTA
CHR	945212	Rev	1592.89	e-01			945196	16	HVO_1034	564	MIS								4.2	-30	CCAGTCCTGCTCGTCGAATGATAGTCTCCCGCGCGGACCTTTTAAGTCTCGACCCACCATATCTCCGACCA
CHR	945793	Rev	130.203	e110	945793	0			HVO_1035	165	CHY							7.4		-28	CGTCCTGCTGCCCCACTGGCGCGCCCCGGACTGTCGGTAGTTTTTACCTGTCAGACCGTGCGATTGTCCTA
CHR	946258	Rev	19.5367	e--1	946256	2			HVO_1036	122	GEN							5.78		-28	ACCGGCCGATTACGCCGGTTCGACGCGCGCTCGGCACAACGGTTATCGGCCGCCGCCGCGAGCGAACCGCA
CHR	946393	Fwd	201.993	e011	946398	5			HVO_1037	157	CHY								2.27	-27	GCCGGTTTCGACGCCGGAACCACGCTTCGGGCGGCGTCACGTTAATAGGCGGCGCAGTACAACCAACGGTA
CHR	947001	Fwd	34.1433	e010	947001	0			HVO_1038	208	GEN								4.42	-29	TCACGCTCGTTCGTGTACGATATCGGGCCGAACCACGTCTTCTTTACCGACCGCTCCCACAGAGAGTACCG
CHR	947846	Fwd	99.2167	e111											HVO_1038s	947857	11	9.25		-28	CGTTCTGGAGGCCGTGGTTCTAATTGGCGATAACAAAGGACTTTTTACAACTAGTGTCCAACATGGTGTTG
CHR	949823	Rev	29.0433	e111	949818	5			HVO_1040	379	GEN								2.72	-28	TCGGTCACCGACTCGATTCGCCGGGCGAACGCCCGGTACATTCAAAAGCCGGCGTCGCATCGAATCGCACG
CHR	953050	Fwd	69.6067	e010			953067	17	HVO_1045	51	CHY								3.42	-28	CTGAGCCGGTTCCCTCGCCGTCCCCCGCGGCAGAGCCACCTTGATGTCCCGTCCGTGAGAACCACGACGCG
CHR	953332	Fwd	538.023	e110	953332	0			HVO_1046	55	CHY							5.91		-28	GCGATGCAGTGGTTGGGCTCGCGGACGATGGTTAGGTGCGTTTTTGTACCGCGAACCCGTCGCCCCGCGTA
CHR	954488	Rev	8.73	e1-1								aTSS	HVO_1047	1047n							CGAGGACGACTTTCCCGCTGCTCTTTCTGGCTTCGATGTACTCGTGGGCCGCCGCGGCGTCTTCGAGGGCG
CHR	956479	Rev	16.8967	e011								iTSS	HVO_1048	1048n				9.17		-28	GGTGACGACGCGGCGGTCGTCGCTCTGGACGACGACACCTACATCACGCTCGGTATCGAGAGCCACAACCA
CHR	956966	Fwd	233.583	e-11	956966	0			HVO_1049	227	GEN								4.2	-26	TGCGTGAGGTCCACACGCCAATCACACCGGGACCGGGGCGCTTTTTTAGCCTCCATCGTTAGGAGACGATG
CHR	960564	Fwd	60.3567	e111	960564	0			HVO_1053	92	TL							5.83		-28	CTCGCGCCGGGGACCGGACGAAACGACCCACACCGAAACTCTTACTCCCGGTCTCCGTTTCCTCCGATACA
CHR	966222	Rev	74.6433	e011	966217	5			HVO_1057	534	TP										CCCTGTCACGCCGTCGCGCCCCCGACTGCGAACCCGAACACGGAAGAACCCGGCGCTCGGTACGTTAGTCC
CHR	966530	Rev	27.2233	e111								iTSS	HVO_1058	1058n1							CCCGCGAGGGCGGCGCGGAGAACGTCGCGCTCATCGAGTCTGACAAGGCCGAAGTGCTCGAAATCGAGGTG
CHR	967021	Rev	8.53333	e--1								iTSS	HVO_1058	1058n2					3.21	-28	CGTCATCGGTCCCGGCGACCGCGTCGTCGTCATCGGCAGCCCCAAGAGCGTCCAGGGCTTCGCAAGCTCCG
CHR	967530	Rev	19.0367	e111								iTSS	HVO_1058	1058n3				7.67		-28	GTCGTCGTCATCGACTGCGACCCCGAGCGCGTCGACGAACTGAACTACTCGCTCGACGTGCTGGCGCTCCA
CHR	967692	Rev	35.2433	e100			967672	20	HVO_1058	445	GEN								4.21	-29	CGTGAGCGTCGGTGTCCCGGAGATTCGAGAAGGGAAATGCACATACGCGCCCGCGGTCCAACACAGGGGTA
CHR	968300	Rev	258.163	e111	968300	0			HVO_1059	180	GEN										GGCGTCCGCGCCGCGCGAGCGAGCGACACGGCCCACAAGGCTTTGGTCCCGCCGACTCCATTCGACGCTCG
CHR	968416	Fwd	8.13667	e--1	968419	3			HVO_1060	319	CHY								4.03	-28	CGCTCGCTCGCGCGGCGCGGACGCCCTCGCAATCGCAACCCATAATCGGTCGGTGTCTCGACATACAGCCG
CHR	976195	Rev	10.4733	e--1								iTSS	HVO_1069	1069n1							CTCGGCGCGCTCGTCCTCGCCATCTCGGCCCAGCCGAACCTCTTTATCGAGGGGCTCATCGGCGACGTGTA
CHR	976383	Fwd	24.9967	e11-								aTSS	HVO_1069	1069n2					3.69	-30	CCAGGCCGTCGGGTTCGTCGCCGAAGAACAGCGAGGCGAACTTGATGGAGTAGAGGAACGTGAAGACGCTC
CHR	976592	Rev	7.33	e--1								iTSS	HVO_1069	1069n3					4.44	-28	GTTCCACATCCTGAACCACGCGAGCTTCAAGGCCGCGCTGTTCATGGTCGCGGGCATCATCGCCCACGAGG
CHR	977696	Rev	23.5933	e010	977696	0			HVO_1069	801	TP							5.02		-28	GTCAGATTTCGACGCCGAACAGCCAACGGGTTTGACAACACCTAAGTCGGCGCTTCCCGCAATTTCCCCCG
CHR	977855	Fwd	234.437	e010			977936	81	HVO_1070	112	REG										ACGTTTTCTGATTTTCATGATTTTCTTTGGAGAATGAAATTTATATCCTTAGCCGACTGTACTACGTCTCA
CHR	978443	Fwd	666.69	e-01			978529	86	HVO_1071	133	CHY							5.51		-28	TAGCGCGCTGTTTTTCAACGAGCGAAATTCCACCTCCACATTTATAGCAACAACTGACTATCTGAGATTCA
CHR	979089	Fwd	220.2	e111	979089	0			HVO_1072	188	NUM							6.01		-27	CGGCGTGGGTCGGCGTGTCCGAGAGCCTCCGAACCGCCACATTTTATGCCCGACCGGCGGAACGAGCGCCA
CHR	979451	Rev	4.75	e11-								aTSS	HVO_1072	1072n							CGACGTCCGCGCCGATGTGGTCGAGCGCGTCGAGGACGGCCTTCATCGTGCCGCCGGTCGACAGCACGTCG
CHR	980512	Fwd	68.4867	e010	980512	0			HVO_1074	281	CHY							7.44		-26	GTCGGTCCCACCCGGGGACACCGCCCGCCGCAGGAGAACGTTTTTTCGTCGGTCGGTCGTCGAAACTGCTG
CHR	981042	Fwd	13.8767	e111								iTSS	HVO_1074	1074n							CCGCGGGACGCACCGAGACGACGCGGAGCCGAATCATTCGGAACACGACACTTGCGGCCGAGTTGAAAGCG
CHR	981781	Fwd	260.723	e111	981781	0			HVO_1076	322	CHM								2.82	-26	CGGCCGAGAAATGTCAGCAAGATAGAGAGGATGCAAAAAGGCCTTGTCCACGTGGCTGGACGTGGGGTGTA
CHR	982186	Fwd	12.09	e1-1								iTSS	HVO_1076	1076n				8.38		-28	CGACAACCTCATCAGCTTCGACGTGGGCGACTTCGTGGACTTCTTCTACGAGAAAAACGAGCCGTGTCTCG
CHR	983513	Rev	62.2167	e111	983513	0			HVO_1077	240	MIS								4.27	-27	GAGGTCTATCGAAACGAGTCCGCGGCGTGTACACCGTAGCGCCTAACTCCTCCAACGCGCTATCGCCTCCA
CHR	983566	Rev	35.3567	e111			983513	53	HVO_1077	240	MIS										GGACAAAGAGGACCTGATGGGTCGGCTCCGCGATTTGGGCTATATGTAGTCCGGAGGTCTATCGAAACGAG
CHR	983928	Rev	20.3267	e111								iTSS	HVO_1078	1078n				7.45		-28	GTCCGCTGGGACGAACAGGAGTCTCGCGGCGACGAGACGTTCTTCAGCCCCCGCCACGACTCCGAGAAGTA
CHR	984540	Rev	47.21	e11-	984540	0			HVO_1078	316	GEN								1.62	-28	CCGCTTCGAGAGCGACTGCGACCGTCCCACAGCGGAAACAGCGATAGTCTCCGCGGCCGAGTCTTGCTGTA
CHR	985647	Rev	1418.89	e001	985642	5			HVO_1079	325	GEN							6.98		-28	TCGGCGGTATCACGCGTCACACTACGCCTCGGGCAAAAAGCATTTACACCGCCTAATTAGATGTAATTACA
CHR	985684	Fwd	54.82	e11-								intergenic		1079n					2.86	-30	TAGTCCGGGAAGGATTCGGCTTCCGACATGATGTGTAATTACATCTAATTAGGCGGTGTAAATGCTTTTTG
CHR	985760	Rev	58.1967	e011			985642	118	HVO_1079	325	GEN							6.46		-28	GGTTCCTCGGACAGCGGAATCAACTGGCGCGACAACAAGTTCATCTCCTAAACGCGTCGTATCTCCTCATC
CHR	985899	Fwd	11.8067	e11-								aTSS	HVO_1080	1080n1							CCGTTCTGCTGGGGGTTCTCGACGACTTCGACGGAGGCGGCACGCACCTCGCCTTCGACGATGCGCGTCGC
CHR	986370	Fwd	13.05	e1-1								intergenic		1080n2							AGTGGCAGTTCCAACGTCGAATGGAGTCGATATACGCGGCCTGACATTGTTGGCTTCGGTATCGACGAGAG
CHR	986403	Rev	183.81	e010			986346	57	HVO_1080	188	CHY							5.17		-28	ACGCCGACTTTGTTGCTCTCGCCTACCGAGAAGGGGAGGCCATATAAGCCTCGAACTCGTACATGAACACA
CHR	986660	Fwd	37.6133	e011								aTSS	HVO_1081	1081n					1.83	-26	AACTCGCCGTCGACGAACGTCTGGGGGATGGTCTCCCAGTCGCTTTTCTCCTTGAGCGCCTCGCGGTAGTG
CHR	987576	Rev	96.1567	e011								iTSS	HVO_1083	1083n1				6.63		-28	GCTTTCGGAGTTCGAAGCAGCATTCGAAGACGACGACACCACTATAAAAACCGCCATCGAATTCGGTACTG
CHR	987626	Fwd	77.8833	e111								aTSS	HVO_1083	1083n2							GGTCGTCGACGTTCTTCATACAGTACCGAATTCGATGGCGGTTTTTATAGTGGTGTCGTCGTCTTCGAATG
CHR	988644	Rev	93.73	e111	988644	0			HVO_1083	357	CHM								4.31	-28	GCTCACCGTGGCTGAATTATTTACTCACTATAGAATAAGTCTTTTGGTGGGGTGGTGCGTTGGTGGAGGTA
CHR	988706	Fwd	726.207	e110								intergenic		1083n3				9.68		-28	TGCTTTCATACCTCCACCAACGCACCACCCCACCAAAAGACTTATTCTATAGTGAGTAAATAATTCAGCCA
CHR	993047	Fwd	1828.33	e011	993047	0			HVO_1087	141	GEN										CTTGGAGACCGTTCCCACGACCTAACACCGACGGTGTCCCTTCAAGTGTCGGCGAGGCGAACACAGAGGTA
CHR	993425	Fwd	43.34	e101								iTSS	HVO_1087	1087n							GGTCGTGATGGGGACCCACGGGCGGACCGGTCGCGACAAGCTCACGTCGCTCGGGAGCGTCACCGAGCGCG
CHR	996959	Fwd	716.057	e100	996959	0			HVO_1090	117	TC							5.8		-28	CCGCCGTGTCAGACCGCCTTCGAACCGGTCGAACGTCAGGATTAAACCGCTCGCACGACGTGTAGATGGTA
CHR	997424	Fwd	17.8833	e11-								intergenic		1090n							TTTCCGGTTCTGTTTCCGGTCCGTTTTCCTTCCGTCCGGGTCTGTTTTCATCCCATCCAGCGTCTCGCTTG
CHR	997982	Fwd	6.89333	e1-1								aTSS	HVO_1091	1091n1							GCGCGCCGCCGACCTGCGTGTACTGCTGGATGTGGTCGGTGACTTCCTTGGTCAGCGTCTCGATGCCGATG
CHR	998071	Rev	25.3767	e1--								iTSS	HVO_1091	1091n2				5.66		-28	CTCTCGCTCGCCGCTGATGGAACCGACGAGCGTCGAGAAGATTCACAAGGCGGACGACCACATCGGCATCG
CHR	999427	Rev	89.8567	e001								iTSS	HVO_1094	1094n					2.82	-29	CACCTCGCGGCGCGCAACCGCGAGCACACGTCCGAGTCGTTCATAGCCCCCGGCGTCAAACGGGGACGGTA
CHR	1000106	Rev	20.9033	e011	1000106	0			HVO_1094	231	RMT								3.95	-26	ACCCCACCGTCCTGCCGCCCCGTCGCTCCGGAACGCAACGCCCTTTTCCCACCCGCACCTGAGTCGGCGTA
CHR	1000800	Rev	29.3567	e110	1000799	1			HVO_1095	184	CHY							10.5		-28	GTCGCCGCGCTCACCGCCTAACTGTTAATTAATCAAAACGTACTTGTTGTCCGAACGATACGTTTCGGACG
CHR	1004279	Fwd	8.72333	e--1								aTSS	HVO_1099	1099n				6.01		-28	TGAAGGCGCGGCGGTTCGCGGGCAGGTGGCCGTAGTAAATCTCCTCGTCAACGAGGTCGTAGACGGGGATG
CHR	1006570	Rev	17.8267	e0-1								iTSS	HVO_1101	1101n1							ACACGACCGTATCAACGCTTCCGCGACCGTCACCACAACCACCAACGACACATGACATCATTCGACTTCTG
CHR	1006631	Fwd	12.7633	e--1								aTSS	HVO_1101s	1101n2							TAGACGCCGCAGAAGTCGAATGATGTCATGTGTCGTTGGTGGTTGTGGTGACGGTCGCGGAAGCGTTGATA
CHR	1006790	Rev	854.62	e11-											HVO_1101s	1006762	28	7.1		-28	CCGCCCGTCGGGTCCGGCAGGTCCTGCAGACGACGCAAGTTATATTACGTTTCCAGCACCTGCATCCGGTG
CHR	1007247	Fwd	26.98	e011								iTSS	HVO_1102	1102n				8.72		-28	TGCACTCGTCGACATCGGTTTCGAGACGAAAATCAAGGATATCAAGACGTTCGGTGACGGCTCGAAGAAGG
CHR	1007711	Rev	7.56	e11-								iTSS	HVO_1103	1103n					4.31	-31	CGGTCTCGTCGTCAGCATCCCCGCCACGGGCGTCATCCTCTTTGTGTCGTTCCAGAGCGTCCAGCAGGTCC
CHR	1008407	Rev	29.3467	e111	1008407	0			HVO_1103	306	CHY								3.12	-31	GGCCGCGCCCCGACTACGCCGGCGTCTCGACCCTCCCGTTTTACGTATTGTCGCATCGACAGGTCGAACTA
CHR	1008662	Rev	29.8667	e111	1008662	0			HVO_1104	55	CHY								3.86	-28	CGCGTGCGCCGAGCTACCACACCCGTTCGAGACGAAAAGCCCTAAGTACGGGACTGACCGCCCTCAGAGTA
CHR	1008781	Fwd	7.12333	e--1	1008781	0			HVO_1105	159	RMT										GTGTGGTAGCTCGGCGCACGCGGTCGGCCGGGACCGCGACCCACTTTAGCCGGCGGGGCAAAGGGCGGGTA
CHR	1009491	Fwd	205.087	e111	1009491	0			HVO_1105A	197	CHY										CGTCTTAGCGTACTGATTTTCGCCCAAATCGGTTCAATAATGTTACCTGATTGGGGAGTCATGATTCTCTA
CHR	1010228	Fwd	16.67	e1-1								aTSS	HVO_1106	1106n1					3.11	-28	AGCGTATGCCCGCCGTTTGAACTCGATCTCTACCGTTACGTCGATGATCTCCCGACTGAGATCTTCCAGAA
CHR	1010544	Rev	10.73	e11-								iTSS	HVO_1106	1106n2							CGAGCTGTTTCGAGACGTACTGATCGCCGATGCAACCGTGTTCAGGTTGCATCGGCTCCTCGATTCGTTTC
CHR	1010936	Fwd	34.35	e111								aTSS	HVO_1106	1106n3							GCGCTCGCGCGCGATGTCTTCGATTAGCTCGGTGGGAAACAGGGAAGTCAACCGTCGTCGTATGAGATCCG
CHR	1010955	Rev	86.0433	e11-	1010955	0			HVO_1106	432	ISH								4.67	-26	TTAAGCGGAGAAACCGACAGACGGCGCTCTAGTGACGAAGCTATCGTTGTAGACCGCGTGGGGAGAGAATG
CHR	1013178	Rev	10.0367	e111	1013178	0			HVO_1109	92	SEC								3.03	-27	TTTCTCCGCCGCACGCGCTCGGCTCCGTGAGACCACAACCGTATTACCGTCGGGTGGCGGACACACGGGTA
CHR	1014483	Fwd	156.823	e111	1014484	1			HVO_1111	364	TP							8.91		-28	TGTCGGTTCACGGTAGTGGCCTCAGCGGCTGTTCAATAAATATTTACCTACTGAAAGCGCGGTTGTGCCCA
CHR	1018797	Fwd	17.1733	e111								iTSS	HVO_1114	1114n							AAACAGCTCTCCAACGGCGGGTCGAAGCTCTCCGACGTTGACAAGGTCATCTCCGACCTCCGCGAGGACTA
CHR	1019622	Rev	307.083	e110	1019618	4			HVO_1116	115	GEN										CACGGGGTGTATAAAGCGCCCCGCATATTCGGGGTGCTCTTCGACGGACGACGCGGCCGAACGTACGAGTG
CHR	1019716	Rev	5.24333	e--1			1019618	98	HVO_1116	115	GEN								4.65	-28	TCCAGCCCCTGATATAAACACCCCCGATACACCGGGCCTTTATATCGTGGTTCGTTTCCACCCGCCGACTG
CHR	1019799	Fwd	125.627	e01-	1019803	4			HVO_1117	213	REG										GAAACGAACCACGATATAAAGGCCCGGTGTATCGGGGGTGTTTATATCAGGGGCTGGAGAGACTGCATACT
CHR	1021229	Rev	65.1667	e-10	1021228	1			HVO_1119	173	EM							6.32		-28	TCGTTTCGCCCGTTTTCAGCGCGTGGGAATCGAAGCTTTCGACTTGTTCGGCCGCTCACTAGAGCCAGCTA
CHR	1021329	Fwd	347.28	e111	1021329	0			HVO_1120	109	GEN										CGAAAGCTTCGATTCCCACGCGCTGAAAACGGGCGAAACGAGCGTGACCGTCCCGCCCGAAGGCGACGGCA
CHR	1022448	Fwd	6.08333	e1-1								iTSS	HVO_1121	1121n					3.74	-29	ACCCGCGAGTACCACGCCGAGGGCGAGGAGATAGAGACGCTCTTGGTCGGCAACTACGCCGACTCCGCCTA
CHR	1022943	Fwd	237.673	e111	1022943	0			HVO_1122	61	CHY							7.36		-27	ACCCCGCCGTCTCCTTTCACCCGCTGGGAACGCTCCGTACGCTTATTTTTCGTCGACTCCAACCGCGGCTA
CHR	1023905	Rev	9.19	e111								iTSS	HVO_1123	1123n				6.59		-28	CGAGGACGTGGACGCCTCGGAGCGACCGTTCACGGTCACGCTCAAGAACGGCGACGTGTACACTGCGGACG
CHR	1024244	Rev	690.34	e111	1024244	0			HVO_1123	349	MIS								4.2	-29	CGTGCCGGTGGTGTAGCGCGCCTCGCAATACAGCGAAACCTTAAGACGCCGGTGTAGCGAACTATCGGCTA
CHR	1026006	Fwd	90.43	e011								aTSS	HVO_1125	1125n1				5.19		-28	CGCCGATGCGGGCGGCTATCTTCTCGTTCACGTCGGTGAAGTTCTCGACGTGGCGCACGTCGTAACCCTCG
CHR	1026120	Rev	44.1933	e01-								iTSS	HVO_1125	1125n2							GGAAGTAGCCGAGTGTGATGACCCTGTCCGTGACCAACACCCTGACGGGAGAGCGCGAGGAGTTCGAGTCG
CHR	1026174	Rev	30.07	e-01	1026173	1			HVO_1125	494	TL								4.61	-28	GACCGCGTATCGACGCCGGCCCGGCCGCGCTTCCGACGGGTTGAAAGTGGTCCCGGAAGTAGCCGAGTGTG
CHR	1028819	Fwd	25.1067	e101	1028819	0			HVO_1128	292	COM							4.92		-28	GTTGGCCGAACCCGAAGATTCCTTTCTCCGATGCGAAGTTCATAAGACACTCCCCTCGTAACCCCCGGACA
CHR	1031508	Rev	250.667	e111	1031508	0			HVO_1130	193	CHY							6.38		-28	ATGCGAGACGACTGAGGGGACACCTCATCGGACCTGAACGTTTTTCTATTCTCGTCTCGACGGTGAAGCCG
CHR	1033191	Rev	23.1367	e-11	1033189	2			HVO_1132	443	NUM										TAGACATGAACGTGCATTTCTCGTCGGCCGCGACCGTAATCTGTTTAGTCCGGCGCGGGGAACGGCCGACG
CHR	1033358	Fwd	191.7	e001											HVO_1132s	1033359	1	7.18		-28	GCCATGAACACGCATTGGCGTGGCGACGGATAACACAACGGTTAATTAGTGTCCTCGTTAAGGTCGCGTTA
CHR	1033871	Rev	39.4967	e111								intergenic		1133n					1.98	-29	TCCGCGGTTCGCCGCGGCTGTCGGCGGTACGAAGCAATAGTGAAACGACCGCGGGGCTCGGAGAGCGTCCG
CHR	1034114	Fwd	8.2	e11-								aTSS	HVO_1134	1134n							GACAGAGATGGTAGCCCTGTTTCCGCGAGAGCTTCACGAAGCTCTTGCGTTTCGACCGACTCAGGAGACCG
CHR	1038438	Fwd	92.2033	e011	1038438	0			HVO_1137	552	GEN							6.29		-28	TCTCGACGGCGGCTCATGGAACGCCTCCCGCGTCAGGACGCTTTTAGCCACCGGCGGCCATAGCGGGTGTA
CHR	1041094	Rev	63.63	e001	1041094	0			HVO_1138	282	EM							6.5		-28	GAGGGCCATGCGGTCCCGTGACGAACGCAGTTTGGGAGGATTTTTAGTAACCCAAGCATAACGGGCGTCTA
CHR	1042400	Rev	366.153	e100			1042391	9	HVO_1139	358	LIP							6.5		-28	TGCGCCGTCTCGGCCGTCCGCGGATGCGGCCCCCCACGAGACTTTTTATCCCCCCTTCCGTAATACGGGTA
CHR	1042434	Fwd	24.0167	e-01			1042509	75	HVO_1140	380	LIP										GTGGCCGGGCATCGGCGTGTCGAGACATTCGAAGCGTACCCGTATTACGGAAGGGGGGATAAAAAGTCTCG
CHR	1042509	Fwd	120.98	e111	1042509	0			HVO_1140	380	LIP								3.58	-28	GGGCCGCATCCGCGGACGGCCGAGACGGCGCAGGAGAAAACCATAAGCATAGTCGATGAAAGATTCAGACA
CHR	1042704	Rev	9.66	e1-1								aTSS	HVO_1140	1140n1				5.34		-28	GCGGCGACGATGGTGCCGAGGCCGCCGGAGCCGCGGGAAATCTCTTCGAGGCCGATGGCGTAGGAGTGGTA
CHR	1042798	Rev	27.71	e11-								aTSS	HVO_1140	1140n2					4.65	-28	GATGTCGGTGCCCTCGTTGAGCGGGGTCAGATACGTCTGCTTTTGCTCCTCGTTGCCGAACTCGTAGAGCA
CHR	1044118	Fwd	5.24	e--1	1044118	0			HVO_1142	91	CHY								2.27	-30	CAGCCACGCTCTCCCACGCCAGTCCGCCGGAACCGATAGTTTAGACAGCCCGTGCTCCCTAGCGCCTCGCA
CHR	1045260	Fwd	13.9133	e1-0	1045260	0			HVO_1144	148	EM								1.85	-28	GTTTCGCCCCGCTCGGCGGTTCGCCGGGCGAACCATGCGACATTTATCGGTCGCGTCCCGAGAAGCGACCA
CHR	1048006	Fwd	11.83	e1-1								aTSS	HVO_1148	1148n1							GAATCTTCGACTCCGTGTTCTGGAGCGCGCGACGGTTGGACTTGTCCTGCTGGTTCTCCTCCATGTGCTCG
CHR	1048124	Fwd	37.47	e101								aTSS	HVO_1148	1148n2					4.61	-28	GTCGCCTGCGGCGTCGTTCTCCTCGAGGATGGTGGTGACCTTCTTGCCCGTGGCGAGCTTGACATCGGGGA
CHR	1048376	Fwd	13.4067	e-10								intergenic		1148n3							TCGTGCCATTGTTGCGGGTTGGAACCGCACTGACCGCAGAAACGAGTACCCCGCAGTCGTATCACCGACTA
CHR	1048442	Rev	254.447	e010			1048314	128	HVO_1148	155	TL							7.41		-28	CCGGACCGAGTCGCGGTCAATTCGGAGCCGAGTCGAAACGGTTTAACCCGGCGCGCGTGGACAACCCGATG
CHR	1048553	Fwd	386.983	e111											HVO_1149	1048559	6				CGGCTCCGAATTGACCGCGACTCGGTCCGGTCGGAATCGAAGGGCTTCTAAACGGGCGACGGCTATCGGAG
CHR	1049129	Rev	20.14	e1-1								intergenic		1148n4					4.01	-30	TGTACTTCATTTGGCCGTGCTAGTTTCTACACACCCAATTCTAATAAAGGCTCGTATTCGTGGGGTATTCG
CHR	1049182	Fwd	2021.57	e110			1049190	8	HVO_1150	130	ISH								2.52	-29	TACCGTCGGTTGCAGGCCGAATACCCCACGAATACGAGCCTTTATTAGAATTGGGTGTGTAGAAACTAGCA
CHR	1049514	Rev	86.7667	e111								aTSS	HVO_1150	1150n				5.99		-28	CGCTACTGCTCCTCCACGTACTTCATGAGTACGTCGATACTCACTTGGCCGGTGGTGGCGAGGAAGTATCC
CHR	1050310	Fwd	38.64	e-01								iTSS	HVO_1151	1151n							TGAAACGACTCCAAGAGCGTGACGCATCCGAGTGGCGGATTGAAGACCGATTCAGCCACTACCAGAACGCG
CHR	1050963	Fwd	249.737	e111	1050964	1			HVO_1153	503	CHY								4.66	-28	CAGACGGGTCTACTTACCTGACTGTCAGGTACCCCGCGAGGTTTTCACCCCGCATCTCCTTCAGGTAGGTA
CHR	1051953	Rev	14.38	e--1								aTSS	HVO_1153	1153n1							CGGTCGCCTGCCAGCCGTGGTACTTGCCGTCTTCGGTGGCGTAGTAGAGCGTCAGGTCGAACGTGCCGTCG
CHR	1052422	Rev	2.72333	e1-1								aTSS	HVO_1153	1153n2				7.29		-28	TGGGCGGGCGGACCCGCTCACTCGACGTCGACTTCGACCTCGTTTTCCGTGACGTGCAGGAAGGTGATGAA
CHR	1055243	Fwd	1.82667	e--1								aTSS	HVO_1157	1157n							TCGTAGAAGCTCCCGTTTTCGGGGTGCGTGAACAGCACCGTTCGCTTCAGCGCGCCGGTCTCGGCGGCCGC
CHR	1056798	Fwd	26.9767	e011								aTSS	HVO_1159	1159n1					2.24	-29	CCGAGGAGCGCGAGCGCCGCCGGGACCGTCAACGCGAGGGTGAAAAGCGGATGCCGCTTGAAAAACAGGTG
CHR	1057012	Fwd	6.54667	e--1								aTSS	HVO_1159	1159n2					3.51	-28	CGTCGTCGGGGCTGAGAAAGCCGTCGCCGATTTCGTCCTGTTTAACCGTCGAGACGAGGACGAGAAAGCCG
CHR	1057160	Fwd	7.75667	e--1								aTSS	HVO_1159	1159n3				6.84		-28	GACGAGGATGATGATGAGAAGCAGCGGAAACAGCGACAGCGTCATGTACATCTCGCCGAACAGCTCCATCG
CHR	1058961	Rev	26.86	e111								iTSS	HVO_1160	1160n1				11.26		-28	GCTCACCGAAATCAACCACTACGACCCCGAAAACGACGAGATTAACGTCCAAGACGTCTACCAGTGGCAGG
CHR	1060480	Fwd	28.4967	e110								aTSS	HVO_1160	1160n2					3.4	-28	CTTCGATGCGGTTCAGGTGCGGTTCGACGACGTAGTACTTCTTTTCGTTCTCCTTGACGGAGTGGAAGATG
CHR	1061260	Rev	47.4233	e001	1061259	1			HVO_1160	1100	MIS							8.06		-28	ACTTAAATAGAACTTAAATTGTGAGTTAATTGGGAAAAAGACTTTTCCATCGGCCCGAATACCCGGTGACA
CHR	1061430	Fwd	40.41	e010								intergenic		1160n3				6.48		-30	GGTCTCGACTCCCCGGCCGAGCGCACCGTTAAAGTAGGGATTTATCTCCAGCAGGGTCGGCGTATGGCGTG
CHR	1061566	Rev	201.607	e01-											HVO_1161	1061565	1		4.35	-27	TCACTGTCTCTCTTCTGTCCGCCCAGCGCGAACCACGCGATTTTTGACCGATCCTGAGAGACAGCGCCGTG
CHR	1062179	Fwd	12.2933	e-01	1062179	0			HVO_1163	166	GEN								1.57	-27	CCCGCCGTCGGCGGTTCCCCTGAATTTCCGCCGACGGTGAAATAATGTGGGCGGAGTCGAACACCCTCGTA
CHR	1062387	Rev	7.79333	e--1								aTSS	HVO_1163	1163n					2.31	-28	GCCGAAGTTGAGGCCGTTCTGCTCGGCGAACTCCGTCAGCGTGAACGGCGTGTCGATGCTGATACCGTACA
CHR	1063466	Fwd	28.97	e011								iTSS	HVO_1164	1164n				9.77		-28	GCCCGGCGAGGAGTCGGCGGTCCTCGTCGAAATCGAGATGCTCAACGCCGCCGGCGTCTATCAGGTCGACA
CHR	1064813	Rev	107.853	e-01	1064809	4			HVO_1166	82	GEN								1.87	-28	CGCGTGTGTACGACAACCAAACGGCCGCCAAAGCCTTACTATTGAAGCCCTCTGGCACATAGTGGAGGCCA
CHR	1065196	Rev	17.6567	e111	1065196	0			HVO_1167	91	RMT								3.81	-28	TCGGTTCCTCGGTGTCGGTCCCGCGTCGCGGTTCGGAACGTCTTTGTCCGGGCCGCTCGCCCGAACGTGTA
CHR	1066467	Fwd	102.343	e111	1066467	0			HVO_1169	368	GEN							9.82		-28	GGCACGCTAACACACGACAGTCCAGCGGGAAGTCACAACGGTTTATCCCGTCGGGGTCGCACGAACGGCCA
CHR	1067600	Fwd	9.77667	e--1								intergenic		1169n							TCGACCGACTCGCCGCGCTCTACGACCGGTTGGCATCGGAATAAAAAACAGCGAGACCGACTGCGAAACCG
CHR	1068031	Rev	86.8567	e011	1068031	0			HVO_1170	142	GEN								3.09	-28	GTTCGGGTGAGCGACGGCACGCTTCTCAGAGACCGTCAGCACTTTCCGGGAGGACGGCCAATTCGCTCTCA
CHR	1068838	Rev	16.7367	e111	1068838	0			HVO_1171	248	GEN								2.02	-28	CGCCCGGGGCGACCCCGAAACCCGCCCCCGGAGCGAGCCACCTTTCTACCGCGACTCCCTACCCCGGAGCG
CHR	1068991	Fwd	4.96333	e1-1								aTSS	HVO_1172	1172n					2.62	-27	GTCAGTGTCGGTGTCGGTCGCGGCTGTGAGCGTCGGCAGCCGTTATTCGTATTCGGCGCGAAGCTCTGCTG
CHR	1069910	Rev	23.0733	e111	1069910	0			HVO_1172	315	GEN							5.99		-28	GGTGCTTTCGGAACGCGGGCGGCGGCCCGGAGGGGAAACGGACTTATCACTCGGCCGAATCATCTGTGCCA
CHR	1070571	Rev	6.08333	e1-1								intergenic		1173n							AAGCCATTGTGCGAAATGGCGTCAGGAACGCCATTAAGTCTTATTACTCCCGGGCAGCGGAGAACCGCAAG
CHR	1070634	Fwd	167.657	e100	1070635	1			HVO_1174	176	TC							6.71		-28	GCGCCCGCTTGCGGTTCTCCGCTGCCCGGGAGTAATAAGACTTAATGGCGTTCCTGACGCCATTTCGCACA
CHR	1070868	Rev	22.8333	e110								aTSS	HVO_1174	1174n				7.81		-28	CGAGGAGGCGGTACATCTCCTCTTCGAGGTTCTCGGGGATGTTTTCGTAGTGGAAGGTCCAGAGGTAGGTG
CHR	1071875	Fwd	23.57	e011								iTSS	HVO_1176	1176n							TACCTGCCGGCGGAGCTGAAGTGCGTCATCGGCCAGTAAGACGATGAACAGGCGACTCCTCGTCGGTATCG
CHR	1072691	Fwd	49.0133	e010	1072691	0			HVO_1177	230	GEN										GTGTCAGCCCGCCGACCCGCGGTTCGCCGGTGTGAACGCTTTTTTGCCTCGCAGCGCGCTACCTCGGGGTA
CHR	1073329	Fwd	7.31333	e1-1								iTSS	HVO_1177	1177n							TCGACGTGACCGTCGGGAGCTACCCCGGCGACCACGTCAGAATTAAACTCGCCGGAGCCGACGAGGAGACG
CHR	1073515	Rev	413.303	e100	1073515	0			HVO_1178	37	CHY							7.34		-28	TGACGCTCACGCCGCGACAACTGTCGCCAGAACCTCACCGTTTAAGAACCGGACGTGGGAACTGTCACCTA
CHR	1073681	Fwd	6.63667	e--1	1073681	0			HVO_1179	354	GEN										TCGCCTCTCGCCGGCTCCCCTCTCGCCGGCTACCGCGTCGCTTTTCCCCGGGGCGCGGGTTCGTTCAGTCA
CHR	1074865	Rev	140.89	e-10								iTSS	HVO_1180	1180n1							TCGACGGTGCTCCACGGGAACGAGACCGACCTCGACGGGTTCAAGGCCGAAACGGACGAAATCGTCGAGTA
CHR	1075016	Rev	16.47	e111								iTSS	HVO_1180	1180n2					3.11	-28	GCGGGAGAAGGCGCTCATCGGCGTCGGCGTCGCGGCCGCGATTAACTGTCCGTACTGTATCTACTTCCACA
CHR	1075272	Rev	63.6167	e111			1075205	67	HVO_1180	124	GEN										CGTCGATACGGGCAGATTATGATTTTCCAGACTATTCATAACTTTACTGCTCCGGAACCTCGTAATAAGCG
CHR	1075297	Rev	28.7567	e011			1075205	92	HVO_1180	124	GEN							5.14		-28	TTAACCCCGAATTTCCCCGGAACGTCGTCGATACGGGCAGATTATGATTTTCCAGACTATTCATAACTTTA
CHR	1075330	Fwd	301.95	e011			1075523	193	HVO_1181	343	REG							7.69		-27	TCGCTATGGAGGCGCTTATTACGAGGTTCCGGAGCAGTAAAGTTATGAATAGTCTGGAAAATCATAATCTG
CHR	1075523	Fwd	247.207	e011	1075523	0			HVO_1181	343	REG							8.59		-28	ACCACTACCCATTATTCACACAGGGTGTAATATAGTGAGATTTAAGGTCATTGGATGGGTTCTGAATGGCA
CHR	1075745	Fwd	10.94	e1-1								iTSS	HVO_1181	1181n					2.38	-28	CAACACCGAAGATTCGAAGGCGACGATTCGCGCCGACAGTCTGAACGCGGAGGCGCTCGAACGCGCCATCG
CHR	1077706	Rev	1092.09	e110											HVO_1183s	1077707	-1		3.89	-27	TATCGAAGAATCGTCGGTGAATCCTGACTCAGCCGATAACTCTTTACCATCGGCTACGATAGTCGATGATA
CHR	1078474	Fwd	28.93	e111								aTSS	HVO_1184	1184n					3.73	-28	GACGTACAACACGGGGTCGGAGACGACCGGCGACTCCGCGTTTATCTCGCTGGTCTCCGTGGAGTTGAACG
CHR	1079264	Rev	24.8133	e--1								aTSS	HVO_1185	1185n							ACGGTTACCCGTGTTCCTCAGCGTTGATACTCAACGTTACTGGAACAGGTGCGCGCCGCAGACCGCCAGCG
CHR	1079362	Fwd	459.09	e110	1079366	4			HVO_1186	74	GEN							6.9		-27	CCAGTAACGTTGAGTATCAACGCTGAGGAACACGGGTAACCGTTAATAACGCCCATTCCCTAGACGGTCCG
CHR	1079634	Fwd	85.94	e101	1079634	0			HVO_1187	143	GEN							6.48		-27	ACGACGTGGCGCGTCACCCGAAGCTGAGGCGATTCCACGGATTTTTACTGTGGAGGTGTGATGGTATCTCA
CHR	1079837	Rev	8.02667	e--1								aTSS	HVO_1187	1187n					3.68	-28	GTTCGCCCGTCACCCGCATCACCCGCGACTTACCGACGAACTTGACGTGGGTCGGCTCGTCGACTTCGATG
CHR	1080188	Fwd	1674.97	e111											HVO_1187s	1080199	11		4.12	-28	CCGTGCGCTCACGGGGTATGAGAACGGCTGTTGCGGTGGCTTTATACATCGTGGCTCCTAAGCGAAAGTCG
CHR	1080432	Fwd	38.0133	e1--			1080508	76	HVO_1188	105	CHY										AGATTCGGCGGGAGGCGAATTCGCCTCCGCCTTTTGACGACCGCTTCGCTCCGAGCCACGGCGTCGCCGCG
CHR	1081207	Fwd	7.57333	e1-1								aTSS	HVO_1189	1189n1				6.02		-28	CCTCGGAGATGACGGCACCGGCCAGCCCGTAGTCGGTGTCGTTCTGAATCTCGACTGCATCCTCGATGTCG
CHR	1081614	Rev	23.4267	e110								iTSS	HVO_1189	1189n2				7.36		-28	CAAACTCGCCGCGTGCGAGATGGGCGGCAAGAACAACATCGTCATCACGGAGAAGGCGGACCTCGACATCG
CHR	1082417	Rev	70.2833	e001	1082415	2			HVO_1189	508	MIS										GCGTCGGTTCGGGCGCGCCCCTTCCATGGGAGGGTCCGGGGTTATTAATCCTAGTTGTGAGTCTAGAGTCA
CHR	1082548	Fwd	72.11	e110	1082548	0			HVO_1190	239	REG										GAACCGACGCATCACCGCGACGCCGAGTGACCACAGATAACATCTTACGTAACGACGTATTACCCGGTGTA
CHR	1083115	Rev	45.1667	e111								aTSS	HVO_1190	1190n					4.61	-27	AGTTCGCGGGTGGAAACCTCGCGGGGCCAGCGGTAGTAGCCTTCTTCGCGCGCGAGTTCGAACGCCTCCCG
CHR	1084135	Rev	41.7	e--1	1084135	0			HVO_1191	279	AA										TTTCAGGAATATTTTTCAGAATGATTTGGTAGGGTCTCTCTTTAGGGTACGTGTCTCACAATAGCGGGTCG
CHR	1084243	Rev	36.93	e01-			1084135	108	HVO_1191	279	AA										CGTGTGATGACATAACAAGCAATGCTCTCCAGCTATCGTAAATATACCTGTGACCGCCCATAGTCGGGACC
CHR	1084258	Rev	8.46	e-11			1084135	123	HVO_1191	279	AA										TTCTGCGTTCCATGTCGTGTGATGACATAACAAGCAATGCTCTCCAGCTATCGTAAATATACCTGTGACCG
CHR	1087715	Fwd	16.2867	e111								iTSS	HVO_1195	1195n1					2.72	-28	CGTCGGTCCCGGCCCGCAGAAAGGCGAGTCCGTCTTCTCGCTTTTCTTCTCCGGCTCCGACGTGACAGAAG
CHR	1087930	Rev	15.42	e111								aTSS	HVO_1195	1195n2					3.92	-28	CTGCGAGGTCCATGATAATCGGCATGTCGTGTTCGATGATGAGAAAGGTCTGTCCCTCCTCGTTGAGTTCG
CHR	1088346	Rev	7.52667	e--1								aTSS	HVO_1196	1196n					3.37	-28	CCATCCTGAGGTTCTCGTCGATGGTGAGCGAGGAAAAGACGTTGTCCACCTGCGGGACGTAGCCCATCCCG
CHR	1089105	Rev	22.0767	e111								iTSS	HVO_1197	1197n				6.04		-28	CCTCAGAGCCGAGAACGTCCTCGTCCGCGAGGACGGCATCTACTTCATCGACGCGACGAACGTCAACGACG
CHR	1089684	Rev	52.6833	e111	1089684	0			HVO_1197	265	GEN							5.43		-28	CGTGTTGACGGTCCGACAGGAATCGTCGTAGGCCCACGAGGTTAAGCCGCCCCTCGTCTTACGGGGGTGCA
CHR	1090161	Rev	55.9267	e111	1090161	0			HVO_1198	145	GEN								3.57	-26	CACGTCGGGTACTCCCATCGCGTGGGAATAGGCATCCGGGTCTTTTTGCGCCGCGGCCCGACGTTCTCGTA
CHR	1090314	Fwd	28.31	e111	1090314	0			HVO_1199	380	LIP							6.96		-28	CGCCGGCCGCGACGCATATCCTTCATGGTCGTTCGATTAGTTTATGTCCGGCACGGCGATAGTTGGTCGCA
CHR	1092188	Fwd	14.37	e110			1092259	71	HVO_1201	708	SIG										CGCTCCGTCTGCTATCAACTTTGATATATGGGGCGAATCGCTTAAGTTCCGTACCAGCTACACGTTTGATA
CHR	1092882	Rev	9.82667	e1-1								aTSS	HVO_1201	1201n1							GCACGACGACCGAGCTAACGCCGATAGAGACGGGGACCGGATTGATGCGGAACGGGAAGAAGAACTCGCCG
CHR	1093697	Fwd	11.76	e-11								iTSS	HVO_1201	1201n2							GGCGTCGTGTTGAACTCGCGGGACGTGACGAGTCGCCATCGCTACGAACAGCGCCTCCGAGTGTTGAATCG
CHR	1095995	Fwd	5.92	e1--								aTSS	HVO_1203	1203n							TACTTGTCCGGCAGCGAGCGGAGATACGGCTTTTCGACGCCGTCTTCCTCGCCGCGGGACTGGTGGACGAG
CHR	1098357	Fwd	163.367	e110								aTSS	HVO_1207	1207n				5.73		-28	TGATGTAGCCGTCCGCCCCCGCCTCGACCGCTTCGCGCATCTTTTCTTCCTGTCCGACCGACGTGCACATG
CHR	1099402	Rev	30.6967	e001	1099401	1			HVO_1208	220	CHY							7.34		-28	TCAGTCATAGTAGTGAGTCCGCCACGGACGGTGACGATGGGATTATATGCCACGGCACCGAGCATTCGCCG
CHR	1099729	Rev	8.56667	e1-1								aTSS	HVO_1209	1209n							GTGTAGTCGTCGCCCTCGAACCGAACGACGATTTCGTCGACTTCACGGCGGTAGACGTTCGTTCGTCGGTG
CHR	1100111	Fwd	90.1433	e-01								iTSS	HVO_1210	1210n1				5.52		-26	GGTTCCCCGCTCCCCACCGAGTGTGGGACCAAACCCACGAAATCTATGTTCGAAAACATCAACGAAGACCG
CHR	1100265	Rev	11.1367	e1-1								aTSS	HVO_1210	1210n2					4.16	-28	TCAGGAAAATCTGGTCGACGGTGCGTTCCTCGCCGGTCTTGTTAACCAAGCCGTGGGCGTTGACGACGTCG
CHR	1101455	Fwd	10.4333	e--1								intergenic		1211n							ACCCGTCGAACTGTAACCCGGCACCGAAACTTTCCTTTCATTTTATCGACGTCGACTGCCGAGCGGCAGCG
CHR	1102317	Fwd	5.97	e--1								aTSS	HVO_1212	1212n					2.93	-28	CGGCCGCCTCGCGGATGTCGTCTTCCGTCTCTTCGAAGGTGAGATACAGGCCACCCTCATCGAACTGGTCG
CHR	1102866	Fwd	35.1133	e-10								iTSS	HVO_1213	1213n				6.9		-28	CACGGCCGACACCGGGGACGAAACGGACACGGAAGAACAACATATGTCATCAGACGATGGACTTGGATTCG
CHR	1104303	Fwd	9.85333	e11-								iTSS	HVO_1214	1214n					2.25	-31	TCGGCGTCCTCATCGCCACGGGAACGCTGTACACGGCGACATCCAACGCGTCGGAGAACGTACTCGAAGCG
CHR	1105026	Rev	144.89	e111								aTSS	HVO_1215	1215n				9.28		-28	AGAGAGAATTGACTGCTCATGGTACGCGGAATTCGAACACCTCTTCGTCACCGTCGACGACGATTGTCATC
CHR	1105701	Fwd	28.8367	e111								iTSS	HVO_1216	1216n				7.15		-28	CGAGGGCTCTATCGGCCCGTTCCGCTCTATCGCCGACGTCTACTTCGAACTGGAGATGGTGGAGGTCGGCA
CHR	1106270	Rev	10.51	e111								aTSS	HVO_1217	1217n							GCCCGAGGCCGACGATGTCGCGGACGAGTCGGTACTGTATCTTGTCGTACGTCGTCTGCGAGACTTCGATG
CHR	1108238	Rev	9.65667	e1-1								aTSS	HVO_1218	1218n							CCACAGCGGGTCGTGCGGCGACATCGTCCGGATGACGAAGTAAAAGCCCAACTGCACGAAGACGAACAGCA
CHR	1110521	Rev	13.82	e1-1								aTSS	HVO_1220	1220n1				6.56		-28	ATCGCCAGCGGTACGCGGGAAAGGCAACGAATCCGAAGCCCACAATTGTGTACGTGAGAAGCAGGGTGACG
CHR	1110674	Fwd	3.77667	e1-1								iTSS	HVO_1220	1220n2					4.15	-27	ACGACCACTTCTGGTACAGCATAATCGGCGTCCTGAGCGCTCTTTTACCAATCCTCGCGATTCATGGCCTA
CHR	1112672	Fwd	10.61	e111								aTSS	HVO_1223	1223n1					3.23	-28	GGTCGAACTCGCGCATCGCCTGCTCGCCGTCGGCGGGAAGTTGAAGCGTCGACACGTCGAGGATCGGGATG
CHR	1113215	Rev	7.4	e--1								iTSS	HVO_1223	1223n2							TCGACGCCGACGCCGTCCGCGAGAAGGCAATCGACAAGGGCGTTGCGACCCGCGAGGAACTGGACCAGATG
CHR	1114849	Fwd	10.0467	e111								aTSS	HVO_1224	1224n					2.72	-27	GTGATGCTCTCTTCGCTCTCGGTGATGAATGCTTGGTAGAGTTCTTCGTCCATGGTCAGGTAGTGAGCCCG
CHR	1116548	Rev	10.1667	e11-								aTSS	HVO_1225	1225n					4.22	-29	GTCGCCGTCGCGCTTGATGACGCCCTCGATGGAGTCGTCTTTTTCCAGCGGCGGGTCCTCCACGTCGTCCA
CHR	1118789	Fwd	8.63	e1-0								iTSS	HVO_1227	1227n1				6.14		-28	CGTCTTCGTCATCGGTTCGACCGGCATGGCAGTCGGCGGCCTCATCGCCTTCTTCTTCGACAACACCATCG
CHR	1118812	Rev	11.6167	e1--								aTSS	HVO_1227	1227n2							CGCCGCGGAAGCGGTCCAGCGCCGACTCGAAATCGTCGTCGTCTTCGACGGTGTCTTCCCACTCTTCGAGG
CHR	1118910	Rev	39.4333	e011								intergenic		1227n3					3.65	-29	CATGGTTTTAGGTACGCCTAATAGTAGAAAAGCGCGTCGATTTTTAGGCAGGCCGAAAAATACTCGTCGTC
CHR	1118978	Fwd	28.2067	e-01	1118978	0			HVO_1228	821	GEN							9.4		-27	CGGACGACGAGTATTTTTCGGCCTGCCTAAAAATCGACGCGCTTTTCTACTATTAGGCGTACCTAAAACCA
CHR	1121452	Fwd	29.98	e1-0								aTSS	HVO_1229	1229n					2.18	-27	CGTACTACTGCGTGCCTCACGAGGCCGCGGGCATGACGGGTACTATCGTCGTCGAGGAGTAGAGTCAACTC
CHR	1121583	Rev	23.34	e--1	1121583	0			HVO_1229	45	CHY							5.32		-28	TACCCCGCCGTGGACACTCCGGGGCGACTCTCGCCGGGAACGTTAACCGCGATGCGGCCGTGGCTCGGATA
CHR	1122396	Fwd	4.03333	e11-								aTSS	HVO_1230	1230n					2.05	-30	CGGCGATGCCGGCGATACCCGCGCCGGCGAAAAGCGGCGTGATTTCGATGCCCCAGATGTACAGGAGCGCG
CHR	1122844	Rev	109.537	e100	1122844	0			HVO_1230	393	TP							5.41		-28	ACAAAACCTTTCGGCCTCCGCGACCGTCAGCGGAGCAATCGTTATCTCCGGTGGCCGCGACTTTCGCGGCA
CHR	1124312	Fwd	8.30667	e1-1								iTSS	HVO_1233	1233n				9.4		-28	CTACGGCTTCATCGAGACCGACGACCACGACGACGACGTGTTCTTCCACATGGAGGACATCGAGGGTCCCG
CHR	1126013	Rev	8.73667	e--1	1126013	0			HVO_1234	498	GEN							4.77		-28	CAACCGGGGTCGCGTCGCTGACCCCTCGGCTGGCCGACACGCTCTTTTCTCCGCCGCCGAAGGGACGCCTA
CHR	1126857	Rev	10.4567	e-11	1126857	0			HVO_1235	264	AA								3.32	-28	AGTCGGCGCGCTCCGGGAGTCCATTTCCCCTTTGGCACCTTTCTTTAGGCGTCGTCGCTTGGTGACGCCCA
CHR	1129774	Fwd	117.11	e111	1129774	0			HVO_1238	324	GEN								1.94	-28	CGGTCGGCCGGTCCCCCGCCGCGGCTACCGCTTGGTCCATCTTTTTGCCGACTCGCGGGGATGTTCGCACA
CHR	1131423	Rev	8.46333	e111								iTSS	HVO_1239	1239n1					4.48	-28	CCTCGCCGAGTCGGGCGAGCGCGGGGCGGCCCTCGGCGGGTTCAACGTCTTCGGGAGCCTCGGCTTCCTCG
CHR	1131758	Rev	27.0267	e111								iTSS	HVO_1239	1239n2				6.22		-28	CCGTACGCCTTCGGCTTCATCGACCGCATGACCGCCGGCTTCTTCGCCCTCGTCGGGGTGTACTACTTCCG
CHR	1132479	Rev	34.92	e111	1132479	0			HVO_1239	405	TP							5.43		-28	TCCGCCTCGGGTAACGGCAATCGAATCGAACAAGGACAGGGCTATTTCCGTCCGGGCCGACCGACCCCGTA
CHR	1134411	Fwd	21.8967	e111	1134411	0			HVO_1242	432	CHY								3.8	-28	GCACGCCGGAGGCGAAATCTTCGACGCACACACCAGAACGGACTTCCCCGCGAGGTCCCTAGCCGGGCGTA
CHR	1139047	Rev	3.96333	e--1			1139003	44	HVO_1247	191	GEN							5.35		-28	GTCACCGGCTCCGCCGCTCGCGACGACGCGTGTCGAAGCCGATTTGTGGAGTCGCGCCGAACCGTGCGGTA
CHR	1139167	Fwd	1600.79	e100	1139167	0			HVO_1248	69	CHY							7.58		-28	GCGAGCGGCGGAGCCGGTGACTTCGCGTCCAATCATCGCCCTTTTATCCGGTGACGCGGAACCTGTGGGTA
CHR	1139448	Rev	460.617	e011								aTSS	HVO_1249	1249n				8.08		-28	ACTCGTCGGGGAGGAACGTCCGAAGCGCCCCCTCGACCCGTTTTTGGTCTTCCGTCTCGTAGCAGAACGTT
CHR	1139984	Rev	17.37	e110								iTSS	HVO_1250	1250n					3.48	-29	GATGGCTTCGAACTCGCGTTCCACTCCCGCATCGACGACGCGATGAGCCCCGACGACGAGGTCTCCGACTA
CHR	1140447	Rev	22.6767	e111	1140447	0			HVO_1250	187	GEN								3.17	-28	GAGCCGCCGACGCCGATGCAGCACTGCCGCGGGCCAACCGCTTTTCATGTCCGCGGGCCAACGTGGCGACA
CHR	1140781	Fwd	9.03333	e--1								aTSS	HVO_1251	1251n1					3.3	-28	TGCCGACCGCGAGGCAGGCACCGGCGGCGAGAACGTAGGGCAGTTTCGGGCTGATGACCGAGTCTGTGACG
CHR	1140919	Fwd	10.94	e1-1								aTSS	HVO_1251	1251n2				4.87		-27	CCACGTCGCTCGGGATTTTGGCCTGGCCGGTCGTCGCCACTTTCATCAGCGGCGCGACGAGCGAGTAGGCC
CHR	1140954	Rev	29.2133	e001	1140954	0			HVO_1251	141	TP								2.8	-28	TCGCGGTTCACTCCCGTCGGCTTGCGGTCGAATCGTAACCCTATACACGACTCGGGGCGGCGTTCTACCCG
CHR	1141062	Rev	83.56	e001			1140954	108	HVO_1251	141	TP							6.88		-28	TACTTGATAAAAATTTGGTCGATAGCGCCATCTAGTCTCATTTATCTATCTCCGGAGAGAATACATACTCG
CHR	1141152	Fwd	1386.56	e111	1141152	0			HVO_1252	65	CHY							10.8		-28	AGATAGATAAATGAGACTAGATGGCGCTATCGACCAAATTTTTATCAAGTATTATCGCGTATTGGTGTGTA
CHR	1141331	Rev	15.2367	e1-1								aTSS	HVO_1252	1252n				7.56		-28	TCGCGCCCGAGTGAACCGACCGCCCCGCGAAAAACAACCGATTTTTGGCCGCCTATCCGGACCACTCGCCG
CHR	1141984	Fwd	42.63	e111	1141984	0			HVO_1254	50	CHY							7.1		-28	ATCGGGATTCGGGCACCCGCGACCGCGAAGTGTCAATAGAATTAACACCGCGGGGGCGGAATCACGGGGCA
CHR	1145634	Rev	21.7833	e01-								iTSS	HVO_1258	1258n					4.64	-28	CGACGCGTCCGACGACGAGACGCGGCTTCAAAACGGCAGTTCCATCCTCGGTGACCCCGAGGACGTGGCCG
CHR	1146525	Fwd	8.35333	e-1-								aTSS	HVO_1259	1259n1					3.55	-26	AATCTGGTTCTCCAGTCGGTCGTTCGTCGCTTCGAGCTCCTCGTTATCCGTTTCGAGGTCGTCAATCTGGT
CHR	1146573	Rev	41.3133	e110								iTSS	HVO_1259	1259n2					2.37	-28	TCGTCGACGCGGGACGAACTCCAAGAGACCGAAAGCAACCTCGAAGACGCCCGGAGCCGAATCAGCGAACT
CHR	1149969	Fwd	10.7533	e110								aTSS	HVO_1261	1261n							TGTTCACGAGCGACTGGCCGGACCGGAGGTCACCCGCGACGTACTCGGTCGGTGGCGGGAAGGTGATATCG
CHR	1151431	Fwd	69.8633	e11-	1151434	3			HVO_1262	485	TP							9.53		-28	GTCATTGCATAACAATGCACTTGAATCATAACACGATATAATTTTATGCTCTAAAGTTATTTGTTGAGCTA
CHR	1154133	Rev	39.51	e110								iTSS	HVO_1264	1264n							CCGGGGAAAACGTGTCAGCGATGGATACCGAGTTCGATTGGATTACCCTCGACGACGACGAAGAGGTTCTC
CHR	1154320	Fwd	145.483	e111	1154320	0			HVO_1265	161	REG							7.57		-27	GGTGTCAACCAACATGACAATTCCACCCGGTTGGGCAAACCATTTTACCGATGCCTGCAACGGACTGTCCA
CHR	1154493	Rev	7.14333	e1-1								aTSS	HVO_1265	1265n1				6.81		-28	CAATCTCCTCGTAGCCCGTCTCGCGGTCGAGTTCGACGTCGACTTCGACCTGCGCGCGAACGTGTTCCTCG
CHR	1154770	Fwd	16.73	e1-0								iTSS	HVO_1265	1265n2							CGAGGTCACGAAGACGGTCACGCACTTCGTGATGGACTCCTACAAGGAGGAGGGCATCGAACTCGGCGACG
CHR	1156585	Rev	89.6367	e001								intergenic		1267n							CTCCCGAATCCATTCGTATTGCACGACGAAAGCGCATTTAATAATACTTTGCGTGTTGGTCTCTCGAACTG
CHR	1161453	Rev	93.6767	e011								iTSS	HVO_1272	1272n				5.2		-28	TCACGCGCGGGCGTGCGACCCGCAATCGGTGATGGAGGACCTCAAGAGCCGCGCCGTCCAACTGGACGACG
CHR	1161732	Rev	67.08	e110	1161729	3			HVO_1272	362	REG										TCGACGCCCGGAGCGAACGCGGGGCGAGAACATACGATAATTAATAGGGATGTATGTCGTGCATCTACAAG
CHR	1163367	Rev	197.76	e111	1163367	0			HVO_1273	498	NUM							6.17		-28	GGGTTTGCGATACATCGACACGCCCGTGCTATCTCGCAACCCTTTTGTCGTCGCCGCAACCACGCTTGATA
CHR	1163728	Rev	10.81	e--1								intergenic		1273n					2.32	-27	CAATGCGCGATGCGGCGGGACACGTGGAGTCCATACGAGATTACAATAGGACAGGAGTATTAAACGTTGTG
CHR	1163765	Fwd	13710.9	e111	1163765	0			HVO_1273A	65	CHY							7.65		-28	AGAAATACTCGTGTCCTGTGCGGGCGTATCCCACACAACGTTTAATACTCCTGTCCTATTGTAATCTCGTA
CHR	1165402	Rev	6.94	e1-1								intergenic		1275n					1.68	-29	ACGACGCGGTTGCTCATACCCGTGCAACCGTCCCGAAGTAAGTAAGCCCTCCGCCAGCGGTCGGGGAGGTG
CHR	1165456	Fwd	367.877	e001	1165456	0			HVO_1276	75	CHY								3.11	-27	ACAGCCAGGTCCCCGACACCTCCCCGACCGCTGGCGGAGGGCTTACTTACTTCGGGACGGTTGCACGGGTA
CHR	1165521	Rev	26.6767	e111								aTSS	HVO_1276	1276n				6.24		-28	TGACGTTCTCGCCGCACTCCGGGCAGTCGAAGTCGGCGTCTTGAATCGGCTCGGCGTCCATCGGGCGCTCG
CHR	1166079	Rev	57.55	e111								intergenic		1277n					4.26	-27	TGGTAATTTCTTCCGACCGAACACCACTCCTTTTCAAACGAGTGATAGAGGCTCGGTGCATAGAGAAACAG
CHR	1166194	Fwd	41.9833	e111	1166194	0			HVO_1278	126	CHY										TGGTGTTCGGTCGGAAGAAATTACCACAAGAATACCAACTGATTATAGTCGCCGGGGGTGACGGGGCGGTA
CHR	1170076	Rev	42.4967	e111	1170076	0			HVO_1282	125	GEN							6.76		-28	CCGACTCCTCGAAGACGCGCCCGACGAGGCCGTCCAAATCCTCTTTACGTACCGGAACTGTTGACAGTTCA
CHR	1171327	Fwd	6.64	e1-1								aTSS	HVO_1284	1284n				6.63		-26	TCGCGGTACTGGTCTTCTGTGAGGTCGGGCGTGACCGAAATGATGTTGTCGCCGCCGACGAAGAACGACAG
CHR	1171870	Rev	90.7033	e111	1171870	0			HVO_1284	261	COM							5.21		-28	GCGACTCGGGGTTGCGGCGGAACCGTCACAGAACCAAAGACCAATATGCGCGACGCCCTACTCGTCTACCG
CHR	1172195	Rev	12.02	e111	1172195	0			HVO_1285	84	CHY							7.5		-28	GTAGGGAGCCGGGGCTGTTGAACGTTCGCCCGCGAGAACTATTATGTTCATTGGTGGCATATGTCGTCGCA
CHR	1173151	Fwd	36.7933	e011			1173162	11	HVO_1287	198	GEN							6.49		-28	GAACTGCGCCGTCCGCGCCGCGGGTCTTCCCTACACAATCGTTATCGTTCTGACGCGACAACTACCGAGCG
CHR	1173837	Fwd	420.157	e111	1173837	0			HVO_1288	44	CHY								4.05	-26	GCCGCTCACACGATGTCTCGTGTGAGAATGTCTGACAAAGATTTTTATTAGGGGCGACGAAGGGAGAGGTA
CHR	1173942	Fwd	36.1767	e01-								iTSS	HVO_1288	1288n				8.38		-28	GGTCGACGACGTCGTCGAATCGGACCCCCAAGACCGCGAGGTTATCATCGTGGAAGGCGAGGCGATGAGTC
CHR	1175299	Rev	45.03	e111	1175296	3			HVO_1290	238	MIS							4.77		-28	CACCGCCGAAAAGCGGTCACACCACCCCCTGCGAATAGCTTTTTGTGTATTTCGCCTGTAACAACCGAGTG
CHR	1175604	Fwd	10.5233	e111	1175604	0			HVO_1291	243	GEN								2.95	-26	CACTGTCCCGCGTCACCGGGCGACTCGCACGATGTAAAAGCCTATCACGCCACCCGCCGACGCGTGGGGCA
CHR	1179103	Fwd	33.28	e111	1179103	0			HVO_1295	361	AA								4.64	-28	CCCGACCCCCTACCGCCACGTCCGACCCGGAGTACGCACCCTTAAGAACCGCGACCCGCATTTTCCGACCA
CHR	1179568	Rev	8.85667	e1-1								aTSS	HVO_1295	1295n							AGTTCGACGAGTTCCTCCCGCGGGAGCACGGAACCGGTGGGGTTGTGCGGCGTTGTGAGGTAGACCATGCG
CHR	1181465	Rev	1.45333	e--1								intergenic		1297n							TTGAGGACGGTAACTGGTGATAATCTCAATCATATAAATCTGGTTTAGCGGGCAACATCCACACCCGACGC
CHR	1183305	Fwd	233.08	e111	1183305	0			HVO_1299	173	REG								2.02	-28	CGCCCCCGCCCCGAGCGATTCGGTGGCCGGTGGCGTGCCTTTTATACGCGGCGGGCGGGTACGTGAGTGTA
CHR	1183924	Rev	106.837	e111								intergenic		1299n							GTTGACTAGGATGAACACAATCGAACTCGCGTCCGGCGAGACTAATAGATTGGTTTTCGTGGATGCGATTG
CHR	1183977	Fwd	15.9067	e-11	1183977	0			HVO_1300	214	CIM										GAGACGCCGTCTCGTGGCAATCGCATCCACGAAAACCAATCTATTAGTCTCGCCGGACGCGAGTTCGATTG
CHR	1187788	Rev	253.083	e110	1187785	3			HVO_1302	429	RRR										CCGTTCCCTCCCGCGTTACGTTCGCCGCGCTATCTGAAGCTTCAGGTGCGTCGCGCCCGTCCACTCGACCA
CHR	1188270	Rev	399.997	e1-1								iTSS	HVO_1303	1303n					3.92	-28	GGGCATGGAAACCACGTCCACGGAGGGACGCATCCTCGCGGTCTTGGAGGAAGACGCGAAAGCGTCGTACG
CHR	1188336	Rev	299.873	e111	1188336	0			HVO_1303	142	REG							7.75		-28	CGGTTCGATGTGACCGAGAACCCTTTTCGGATTCGCAAGATATTTTTCTCCCGTAGGAAAACCAACGGGCA
CHR	1191321	Rev	320.243	e111											HVO_1305s	1191322	-1	7.08		-28	AGACCTTCATTATCTTTACTTGTTAATCCATAGCAAAGTCTTTAATCGGACCCTCCCCAACTTTTCAGGTA
CHR	1192159	Rev	4.91667	e--1								iTSS	HVO_1306	1306n				5.94		-28	GGCCAAGCAGGTCATCGAGCAGAGCGACCACGACATCGAAATCAAGGCGCACGTCAACCAAATCGGCGACG
CHR	1194953	Rev	17.5267	e111	1194953	0			HVO_1308	430	AA								2.13	-28	CGCCGTTGCCGTCCGGGAGAACGTCGCCGCGTCCGGTACCCTGATACCGGACCCTGCCGACCCCTCGCGTA
CHR	1195087	Fwd	170.483	e111			1195278	191	HVO_1309	391	GEN							6.26		-28	AACGGCGACGCGGTCGCTCGATTTCGTGTCTGCCAACAAACATATATCGCGGGAGAGCGTATCGTACGTCC
CHR	1195278	Fwd	50.2833	e110	1195278	0			HVO_1309	391	GEN										GCGGTGCCGATACCGGAACCCGCCGACCGCGACGCGAGAGTTTTACTACCGGCCGGGCGAACCCCGGCGTA
CHR	1197008	Rev	323.143	e001	1197008	0			HVO_1310	173	CHY							5.85		-28	GGTCTCTCCGACGCGATATTCTACCGAATCGGCAATTAGACTTAACTACCGGTGGGGAATCGCATAGCGCA
CHR	1197108	Rev	115.54	e010											HVO_1310s	1197109	-1	5.96		-28	CTGACCACCGGTTATCGGCGCTGAGGCTCGGAGGCGGACGTTTATGTTCGATGAACTCGAAATACTGTGCG
CHR	1198020	Rev	9.08667	e111	1198020	0			HVO_1311	281	GEN										GACCCGCAAACCACGTTCAACCGACGCCCGGTGTACGAACCATCAAGTGGCCGATGACCGATAAGAAACTA
CHR	1198053	Fwd	15.13	e111			1198166	113	HVO_1312	272	AA										GCCGTCCGACCCTCGAAATCCACATCATCGAATGCCATAGTTTCTTATCGGTCATCGGCCACTTGATGGTT
CHR	1201225	Fwd	14.3667	e11-								iTSS	HVO_1314	1314n				7.03		-28	GGAGCTGTACGACATGACCGCGGAGTTCGAAAACGGCACCGTGAAGCTCCACGACCGCGTCTGGGAGCGGA
CHR	1202160	Rev	15.7567	e--1	1202160	0			HVO_1317	83	CHY								1.79	-28	CGGCCCGGGATTCAATCTTTGGTGTCGGTCGACCGAAAGGACCACGTTCGCCCCCGGCAACGCGTTCGACA
CHR	1202222	Fwd	13.93	e111			1202245	23	HVO_1318	268	MIS										GCGTGACATGTCGAACGCGTTGCCGGGGGCGAACGTGGTCCTTTCGGTCGACCGACACCAAAGATTGAATC
CHR	1204330	Rev	24.3167	e111			1204086	244	HVO_1320	149	TP										GCGAGAACGGACATCGCACTGGTTCCTAATCCAACGCCGAAGAGAAGCGTCAACAGCTCATAGAGCTATCA
CHR	1204366	Fwd	156.37	e101								intergenic		1321n					2.12	-27	ATCACCTTCGTGACCGCTCCGATGCGTCGCCGGGTGATAGCTCTATGAGCTGTTGACGCTTCTCTTCGGCG
CHR	1204638	Rev	29.3433	e111								iTSS	HVO_1322	1322n							CCGCGAGGAGATAGAGGATATCGACCGCGGCATCGTCGAACTCATCGCCCGTCGAACCTACGTCGCCGACA
CHR	1205784	Fwd	10.2833	e111	1205784	0			HVO_1324	142	CHY								3.92	-28	CGGAAGCGACGCCCGGCGCGAGTCGTCCCGAGACGCGACGCTTTTGCCGTCCCCGGAGCAACGGTGAGCCA
CHR	1206627	Rev	111.63	e111	1206627	0			HVO_1326	44	GEN							5.52		-28	GTTCGGTCGCTCGACCCTTGAGGGTTCGCCCGGAGTAACCGTTTTCCGGGACGGCGCGGTAACAGTACGCA
CHR	1210759	Fwd	7.04	e--1								aTSS	HVO_1330	1330n					2.39	-31	GATGTCGATGGCGGCGAGTTCCTCCTCCGAGAGGACGTAGTTGAGGTTGAACGACTTGTACGGACCCATCA
CHR	1210835	Rev	8.21333	e-10	1210835	0			HVO_1330	206	CHY								4.63	-28	TTAACAGTTCTTGAGTCGAACTCCGCTGAAAAATCCCGACTTTATATACTACCGCGCGGTACGTGTGTCCA
CHR	1210931	Fwd	98.98	e110	1210934	3			HVO_1331	133	REG							8.12		-28	ATAAAGTCGGGATTTTTCAGCGGAGTTCGACTCAAGAACTGTTAAACCGATACGCTCCGTCTAGCGAACCG
CHR	1211318	Fwd	63.5433	e111								iTSS	HVO_1331	1331n					3.8	-28	GTCGCTCGGCTCCGACATCCTCGAACACGGCGTCGAGGAGCTCATCCGGCGCGAGCGCGACTATCGGAACG
CHR	1214682	Rev	87.7067	e010	1214681	1			HVO_1333	946	MIS							4.91		-28	ACGACATGAATCTCCCGGTGGGGACCGCCCCGAGCGGTGCGCTTAATCGCCTCGAACCGTAACCTCGGGCG
CHR	1215131	Fwd	15.1233	e111								iTSS	HVO_1335	1335n				5.77		-28	CTTTTGGCTGTCGCAGGCGGGCTTTACCGCCGGAAACCTGCTTATGGTCCTCGGTAACCAACGGGGCGACC
CHR	1219399	Fwd	51.2	e111	1219399	0			HVO_1339	125	CHY								1.8	-28	GGATAAAAAGTGTTGCCGGGCGGCCGGCCGCGGGCGAATCACTAAGTGCTCGCGTGCCAGTTGGACCCGTA
CHR	1222169	Fwd	43.6867	e011								iTSS	HVO_1342	1342n				8.28		-28	GACCCTCCAGTTCTACGCCGGCGGCGAGCAGGTCAAAGAGGTCATCGGCGTCCAGAGCAAAGAGGACCTCG
CHR	1222469	Fwd	5.31667	e--1								aTSS	HVO_1343	1343n1							GGACCGCGTCTATCTCCTCGAACTCGGCGACCATGCGCGCCTTCAGTGCCTGGATCGTCATCGGCGAGATG
CHR	1222473	Rev	51.73	e001								iTSS	HVO_1343	1343n2					1.32	-27	GCGGGTATCGAGGCAATCGACGAGGAGACCGGCGAGGTGTGGATTTCACTCACCGGCGCGTGTTCCGGATG
CHR	1222636	Rev	1641.75	e001	1222636	0			HVO_1343	104	GEN							6.31		-28	AGCGTCTCGCGAAATTCGCCGCGACCCGTTCGGAGCAATCGTTATGCTCGCCCGCACCCCACCTCTCGGTA
CHR	1222761	Fwd	323.73	e111	1222761	0			HVO_1344	238	GEN								3.91	-28	AATTTCGCGAGACGCTGTCGGGGGAGTCGGTCGGCGAGGGCTTTTTACCACGGAGAGAGTATCGGAACCTA
CHR	1222960	Rev	8.96667	e--1								aTSS	HVO_1344	1344n1					2.63	-29	GGCCGTGATCTGAATCTCGCCTTTCTTGACGACCTCGGGGATTATCTGGAGCGGGTCGGTCGTTCCGAACA
CHR	1223369	Rev	73.8633	e111								aTSS	HVO_1344	1344n2				8.55		-28	CCGTGCCGCTCGTGATGTTGTTCACCTTGTCGTAGAAGTCGTTTTGCATCCCCGCGGGGAACGTGATGACG
CHR	1223834	Rev	34.9567	e111	1223834	0			HVO_1345	109	GEN								4.12	-30	ACCTGACAGTTCGGTGACTGCGACAGTCTCCCCACAAATCACTTATACCAACGGGCGGGATGTTCGCCGTA
CHR	1223949	Fwd	96.56	e011											HVO_1345s	1223950	1		2.9	-27	CTGTCGCAGTCACCGAACTGTCAGGTCGCGTCCGGGCAACCTACAAGAGTCCCGGCGTCCAAACGCGGCCA
CHR	1227398	Rev	17.3	e011	1227398	0			HVO_1348	478	COM										CCCGAGTCAAACGTTGCGAATCCGACCCGCGACCACATGTGTTAACGCGCCGCCGGGCGAACGGGGGCGTA
CHR	1228714	Fwd	298.023	e001	1228716	2			HVO_1350	127	REG							9.72		-28	TCGACCGGGTCGACCTATCGAGTGACTGATAGACGAAACGATTTACTTCCCCCCACCCGTGATGTCAGTTG
CHR	1229310	Fwd	70.08	e111								iTSS	HVO_1351	1351n					3.54	-28	CCCGGAGGCGTACCCGGAGCAGGCCGACGGAATCGAAACCGCGATACAGACCGCCCGAGACGACGGGTTCG
CHR	1232023	Fwd	71.57	e110			1232031	8	HVO_1353	73	CHY							6.59		-29	ACCCACTGGTATTGTCAATGCCTACCACACTTAGTGAAGATTATGTAATCACGGTCGCGTTTGTGTACGTG
CHR	1232150	Rev	12.85	e1--								aTSS	HVO_1353	1353n					3.02	-28	CGGCGTCGGCGGTCAACCACGCATCCATCCGGTCGCAGCAGCTATCGCGTCGGGGGTAGACGGTGACCTGG
CHR	1234376	Rev	127.403	e001								iTSS	HVO_1355	1355n1				5.68		-28	GCTCATCCACGTCCACTCGCTGCTCGTGGAAATCGCCACGGACTACCGCGACGGCGGGATACTCACGAGCG
CHR	1234716	Rev	2060.6	e110								intergenic		1355n2					1.68	-29	TCGGTCGGCTCGAATCGAGCCTAACCACGTAGGGTTGTGAATTACTACTAACCGTTCCATTCGACTATATG
CHR	1236025	Rev	13.63	e111								aTSS	HVO_1356	1356n1				6.76		-28	ACGCGGGCGGAACTCGTGGGACTCGCGTTCGACGATGACTTTCATGAACGTCCGCATCGTCCCGACGAGTT
CHR	1236602	Rev	15.9833	e11-								intergenic		1356n2					3.24	-26	GTTCGGTGACCATCGTATCGAACACACAGTAACGGCGAACGGTAATATATCTGCCCATCGAAACAGGTGGA
CHR	1236654	Fwd	156.043	e001			1236660	6	HVO_1357	582	REG							7.38		-28	TCGCCTTACCGCCTAAATTCCACCTGTTTCGATGGGCAGATATATTACCGTTCGCCGTTACTGTGTGTTCG
CHR	1239142	Rev	690.09	e111			1239131	11	HVO_1359	68	GEN										CCCTGGATTGGTCCGCGTCCCAAATCGATTAGGTTCCGTATTCAACCGCATAGGGTCCATAGCTACTGCCA
CHR	1239509	Rev	160.137	e110								iTSS	HVO_1360	1360n							CTCGAATGTCTCCACGGACTGAAGCAACTCGACCGACGGTGTTTTGAGGTGCTCGTCGAGACCGACGACCG
CHR	1240442	Rev	10.8367	e--1								iTSS	HVO_1361	1361n1				5.95		-28	AATCGTCCTCTACCTCGAAGAGCTCGGACTCGCCGGTAACATCATCAGCGTCACGTACGTGCTGCTTCTCG
CHR	1240570	Rev	11.4333	e--1								iTSS	HVO_1361	1361n2				6.23		-28	GGGCTCGCGTTCGTCTTCGGGACCTCCGTCATCGCGACACTGAAGCACCGCGACCTCGGACAGGTCGACTA
CHR	1242813	Rev	6.15	e--1								iTSS	HVO_1365	1365n							CATCGAGGCCATCCACACGCCCGGCCACACGACCGGTATGACGACCTACGCGGTCGACAACGTGCTGTTCA
CHR	1244771	Rev	13.51	e--1								intergenic		1367n							CTGGATTCACTCGATGGTCGGGCGACAGCGACCGCTCTCGTCGCGTCTGAAGAAATGGAAAAGGGAATCGT
CHR	1245682	Rev	88.3867	e111	1245682	0			HVO_1368	267	GEN							7.42		-28	ATCTCTAGTGCCCGACGAAGATATATTGACTGCCTGAACGGTTATGTCCGCTCCGTCCTAACCCCGGAATA
CHR	1245757	Fwd	23.6567	e111								intergenic		1368n							CGGGGTTAGGACGGAGCGGACATAACCGTTCAGGCAGTCAATATATCTTCGTCGGGCACTAGAGATACGCG
CHR	1247630	Fwd	9.93	e--1								aTSS	HVO_1370	1370n					4.08	-28	ACTCGAAGATGGTCGCCACGACGCCGATGGGGACCGAGAGTTTGTACAGTTCGAGGTCCTCGTCCAGTTCG
CHR	1249615	Rev	17.6533	e0-1			1249608	7	HVO_1372	257	AA								4.14	-29	ACAACTCGTTTTCCGGTTTGGCATGGCTTGACCGGAACGCAGTTACTATCTGAGCGTCGTACCTTGAGTCA
CHR	1250254	Fwd	6.40333	e1--								aTSS	HVO_1373	1373n1							GGTTCTCCTCGGGCACCTCGCAGTCGTCGAAGACGATGTGGCCTTGCTTGGAGGCGCGCATACCCATCTTC
CHR	1250329	Fwd	15.1433	e--1								aTSS	HVO_1373	1373n2							GGATGTGTTCCGCCTCGTAGCCGGACGTGTCGGTCGGCACGATGAACATCGAGTAGTTCGAGTAGCGGTCG
CHR	1250865	Rev	46.8667	e11-	1250865	0			HVO_1373	383	LIP							6.12		-28	TAACAAAAAACAAGTTTGAAGTTTAGACTGGTTCCATGCCTATTTTTACTGTACGATTCCATGGCGTGGTA
CHR	1251810	Rev	37.3267	e111								iTSS	HVO_1374	1374n				5.54		-28	CTACCCCGGCCCGTCGCCGACGCCCGAGGACCTCGCGACACTCATCGAGGAGGAGGGCGTGACGATGACCG
CHR	1252617	Rev	16.37	e111	1252617	0			HVO_1374	553	LIP							10.29		-28	CCGAATCCGCAGCCCGCACCACGCCGAGTCATTTCCAAACAATCATTACGTTTTACCACAAGAGGACACTA
CHR	1255037	Rev	51.25	e111	1255037	0			HVO_1376	127	CIM										TTGTCGTTACTATCATGACAGGAGTATCGAACCGTCTGGGTTTATCCGTTGCGCCCGACGAACTGGAGGCA
CHR	1255072	Rev	17.6167	e11-			1255037	35	HVO_1376	127	CIM										CGTCTCCTCGATGTCGCGGCCGATGACCGTCTCCGTTGTCGTTACTATCATGACAGGAGTATCGAACCGTC
CHR	1255092	Fwd	700.577	e001	1255092	0			HVO_1377	124	GEN								2.44	-28	CGTGGTCGAAATGCATGCCTCCAGTTCGTCGGGCGCAACGGATAAACCCAGACGGTTCGATACTCCTGTCA
CHR	1256408	Rev	930.42	e110											HVO_1379s	1256409	-1	8.47		-28	AACGAGTCACTAATTCTATACGTTCACCCGTCCAACAACTTTTATTATCACCCCCCGAGTGGAGACAATCG
CHR	1256623	Fwd	18.0967	e1-1								aTSS	HVO_1380	1380n1					2.51	-28	GGGTTCGTACTCTCCGAACTCCTCGCGGAGGACGCCGCAGATTTCCCCGACCGTCGCGTAGGCCTTGACCG
CHR	1257371	Fwd	10.29	e111								aTSS	HVO_1380	1380n2							CGGCGGGCGGCGCGGAACTTCGCCACCTCTTCGAGGATGTTGTTGTGGGCGTTGAAGAAGAAGGACAACTG
CHR	1257744	Fwd	4.79667	e--1								aTSS	HVO_1380	1380n3							CGAGGGCGACGTACATCGCCAGCAACACCGCCGCCGGGGCGTTGATGGTCATCGACGTGGAGACCTCACCG
CHR	1258217	Rev	76.8133	e011	1258217	0			HVO_1380	558	CIM								4.19	-28	CGGTCGGAGACAGCGACCGATATCCGCCGACCCGCGTACGCTTAAGTAGGGACAAACCACATCTTCGACCA
CHR	1259125	Fwd	158.253	e001	1259125	0			HVO_1382	129	TL							6.41		-28	CGGGACGCGCGCCGACCGCCGCGCACCGACGTTCGCCACGCTTTTGAGCGCCCACCCCGACCGTTCGGGTA
CHR	1261644	Rev	51.45	e-01	1261644	0			HVO_1386	85	CHY										GATTCTCCCGCATAGCCGTGCTAGCACGGCTCCTACAACTGCTAATACGCCCTATGTATAATGAACAATCG
CHR	1262536	Rev	38.32	e111	1262536	0			HVO_1387	257	LIP							4.89		-28	GTTGTTCTGGATTCTTCAGCGCGACCGGCGAACGTTAATTATTATCCCTGTGCCTCGCGTCGCCCCGAGTA
CHR	1262636	Fwd	21.0133	e101	1262636	0			HVO_1388	166	CHY							5.88		-29	TAATTAACGTTCGCCGGTCGCGCTGAAGAATCCAGAACAACGTTATAGCCCCTCCGTCGAATCCACCGATA
CHR	1263755	Rev	28.35	e111	1263755	0			HVO_1389	199	GEN								3.18	-28	GAGCGCGAACGAGACCGCGCCGAGCCCGGCAGTGAGAACGCCTAACTTCGCGCCCCGCCAACCGAGCGGTA
CHR	1264767	Rev	7.02333	e--1	1264767	0			HVO_1390	328	CHY										GTCATCGTCGAACCACGCGCCGAAGCCACCCGACCGAAACGCCTTCGGCCTCCCGCCGCAACTCCCGGTCG
CHR	1265396	Rev	310.597	e101	1265395	1			HVO_1391	151	GEN							5.99		-28	GAACGAACGACCGTGCGAACACGCTACAGCCTCCGATACCCTCTTAAAGGGTGGCACGTTTATTTCGGGTA
CHR	1265544	Fwd	978.71	e100			1265555	11	HVO_1392	109	TL							4.86		-28	GGGCGGCGGAAGCCCGGGGTCCCCGGTTCGTGTAGATGCGCTTTTACCGTCGGAGCGTGCAACAAGGAGTA
CHR	1267760	Rev	48.9933	e0-1	1267759	1			HVO_1394	516	TP							6.8		-28	ACGCAAGTTTGGAAGAAATAGTTGGAGGAAATTCGTGCCTATTATATATCCCAGTCAAGCTCTGACAAACG
CHR	1267840	Fwd	6.26	e11-			1267888	48	HVO_1395	427	GEN										AGCTTGACTGGGATATATAATAGGCACGAATTTCCTCCAACTATTTCTTCCAAACTTGCGTTTCTTGCCCA
CHR	1267888	Fwd	44.4067	e101	1267888	0			HVO_1395	427	GEN										TCCAAACTTGCGTTTCTTGCCCACGAAACGTCGGGAGCGTTTATCATCGCCGGGGGAAAAGAGTCCAGACA
CHR	1269300	Fwd	49.11	e010	1269301	1			HVO_1397	398	SIG								2.18	-28	GCACGACCGGCCGAACAGCCCGCGACGAACCGCCAGCGGTTATTTGTCCCCCCCGTGCATAGCCGGCAGCG
CHR	1270581	Rev	51.2267	e010								iTSS	HVO_1396	1396n					4.35	-29	AGCTACGGTCACTGGAGCCGGATTTACGAGTTCTTCAAAATCAAGCGTCTGGCCGACGAACTGTTGGCCCA
CHR	1271887	Rev	8.84333	e111	1271887	0			HVO_1396	471	GEN								3.81	-28	CCCTCGGACTCGCCGCGCGCGGTCGGTGCGGGAGTAAAGAGTTTTCAGCCCGCGATATGGAGGTGATACCA
CHR	1272940	Fwd	20.2833	e11-								aTSS	HVO_1398	1398n							CTCGAGTCCGATGTTCACCACGCCGGCCTTCTCGGAGAAGATACCGCCGAGCGCGGCGAACGTGATGGGCA
CHR	1273759	Rev	13.08	e--1								iTSS	HVO_1399	1399n1							GGCGTACGCCGACGCCAACGAGGTCATCACGACCATCATGCTGAACTTCATCGCGGCGCAAATCGCGTTCG
CHR	1274082	Fwd	5.22333	e--1								aTSS	HVO_1399	1399n2							GCCCGCGCGGAAGGAGACGGCGACCGAGAGGCCGGTGAAGATGAGGAGCGTCGTCTCCTTGAGTGTGAGCG
CHR	1274515	Fwd	2.06	e--1								aTSS	HVO_1400	1400n1							GTTCGCCGGCCATGAGCAGGCCAATCTCTTCTTCGGTGGTGTTGCGTGGGTCTACGATGTCCATGAGTTCG
CHR	1275535	Fwd	13.4933	e--1								aTSS	HVO_1400	1400n2				7.62		-28	TGTCGGCCCCGCGATAGAGTGCTTTCAAGATTTCGACGCGCTGTTGAACGCCGACGCTCACGTCCTCGATG
CHR	1275685	Rev	8.29333	e--1								iTSS	HVO_1400	1400n3							AACCGCGGGACTTCGATTCGCCCGCGGACGCAATCGACGCCGGAATCGGTATGATTCACCAGCACTTCATG
CHR	1275944	Fwd	8.74667	e1--								aTSS	HVO_1400	1400n4							GGTCAGGTCCACGTCGTCGTTCGCCACGACGCCGGGGAACCGTTTTGTGATTTCGTCGAGATGAACAGCGG
CHR	1275952	Rev	247.193	e100	1275951	1			HVO_1400	519	TP								4.43	-28	TCCGTGTGGACCACTCCCGCGTCGAGTCGAATCCCACGAGTTTAAGCGAACCCCCCGAAAAAAGGCTCAAG
CHR	1276598	Rev	80.1833	e-01								iTSS	HVO_1401	1401n1				6.12		-28	AGGCCGGCTACGAGGCCGGCGTGGCGCACGCGGACGAGGAGATATCCGTGGACGTGGCCTACGTCGGGTCG
CHR	1276840	Rev	27.4333	e100								iTSS	HVO_1401	1401n2				10.39		-28	CGCGCTCTCCGAAACCGCGCCGAGTTTCTCGGACCAGAAGTTCATGATCGTCGACGACGTGGTCGACGAGG
CHR	1278854	Rev	8.06333	e--1	1278854	0			HVO_1402	453	CHM								2.21	-28	CCCGTGCGGCCGCCTCGCACGCGTCCCCCGAACCGTCAGCATCTAAGTACGACCCCGTCAACGCTGGACTA
CHR	1279029	Fwd	97.4067	e111	1279029	0			HVO_1403	94	MIS								1.69	-28	TCCCGGGCGAACCGCCGAATCGACCGGCCGAGGCAGCACGCCTTTGAGGGCGGGCGTCGAATCGGGAGCCA
CHR	1280088	Rev	34.97	e--1	1280088	0			HVO_1405	147	CHY								2.45	-27	GTTCCCGCCCGATTTCGAGCCCCGGCTCTCCGGCCCGAAGCTACATCTGCGACCCATCCTAACCCCGCGTA
CHR	1280333	Rev	78	e111											HVO_1405s	1280313	20	8.29		-28	TATAGTCAACAATAGTGTGTGGTATTCTCGGAGGAGAAGATATTTATGTGCAGTGTTCAATCGAATAGGTG
CHR	1282223	Rev	7.77667	e--1			1281985	238	HVO_1407	225	GEN							5.35		-28	GTACTACTATCATTGCGTTACCTGGTACGAGACCGAACTGATATATGTGTTTGCTGACATATGTGTCACCG
CHR	1283611	Fwd	94.7	e111	1283612	1			HVO_1410	217	CHY								2.59	-28	TGCCCGCCCGTTATCGTGAGTTGATAATGGGGCGCGAAGCTTTATCGAGAGACACAGAGTCTTTTGAACCA
CHR	1287581	Fwd	131.167	e111			1287661	80	HVO_1414	569	SIG							7.64		-28	CGACCCGCTCCCGCGGTCCGCCGGCCCGACCCTGAGAAGTTCTTTATCCGATGCCGGAGTATCTCCAGCTA
CHR	1288045	Fwd	27.96	e011								iTSS	HVO_1414	1414n					1.85	-28	CTCGGCGCTGTACGTCGTCCCCGCGGTGTTCCTCGTCGTCCTCTTTACCAACCCGCTGGAACTCGGCTACA
CHR	1290242	Fwd	120.783	e111	1290242	0			HVO_1416	334	GEN								2.73	-28	GTCGCCATCGCCATCGGCCGCCGCGAGCCGTCCGCTGGACCTTTGTTCGCGTCACCCGTAGAGTGGTTCCA
CHR	1293123	Fwd	23.6433	e111			1293349	226	HVO_1419	225	REG										CCGCGAGTATCGCGTATTCGCTCCGGTCCATGTGATTGAGTATGAGGGAAGCCGTACCTAACTGGGTTGTG
CHR	1293348	Fwd	52.61	e111	1293349	1			HVO_1419	225	REG							8.12		-28	AGGAGGCGTAATACGGCCTGTCTCTCGGGGTACCCAGAAAGTTAACTTCGAGTAGCACCTCCGTTTCTCCC
CHR	1295055	Fwd	12.79	e111								aTSS	HVO_1422	1422n				8.15		-28	GGGGTATATAAACCACCTCTCGCGTTCGGATATGTCGAACACTCATTGTTCTACCACGGGAGGTGATTCCG
CHR	1296491	Rev	4.50667	e--1			1296386	105	HVO_1422A	102	GEN							7.19		-28	AATCTAATCCTTATCTATAGATACGAATATCGCAGGTAGAATTAAGTACAGACAATCTGTTCTATCGGCCA
CHR	1296636	Fwd	115.407	e010	1296636	0			HVO_1423	85	GEN							5.49		-28	CAGAGTGGGATTAAATAAGTGAAGTCGCCTTATCGGGATGATAATCACATTCCGGCGTATTCAGAATTGTA
CHR	1297020	Fwd	24.7933	e111			1297044	24	HVO_1424	359	CHY										TGAATTTGTCAGTCAATTCAATAACTGAATTCTTAGTGAGGTTGAAACAGTTCTAGACATAACGACTTTTA
CHR	1297032	Rev	13.5033	e--1								intergenic		1423n				6.35		-28	AATTCTGTGGTGATCGGTAGTTTTTGTTCAACCTCAGAAGTGTCAATTCCTCTCTTCATTATTGTTGGATA
CHR	1297512	Fwd	39.86	e--1								iTSS	HVO_1424	1424n1							TGCAGCGATCCAGCAATTCATTCGCACAGAGTTGGAGTATCTATTTATGGTCTCAAGAAGCGCATATGACA
CHR	1297629	Fwd	63.2233	e-01								iTSS	HVO_1424	1424n2							AGACGGAGATGAAGACTATAGTGCCCAATTGCCAACCAGCTCTTTTAAAGACGTGGCACTTAGCGGGAATG
CHR	1297747	Rev	220	e010								aTSS	HVO_1424	1424n3				8.34		-28	TTCTTTGGTCGTGTCAACTGCTAACCCATCACTCGCAATGAATATAGTTTTTGGAGAGTCTCCTTGGTGGG
CHR	1297835	Rev	26.8167	e011								aTSS	HVO_1424	1424n4							CAACTACGTGTGCGATGAATGGCCAAAGCGGTGCTATTCCATTATTAACGATGTGCTCATCTTCCCATACA
CHR	1298434	Rev	82.2667	e11-								iTSS	HVO_1425	1425n1							CGTTCTCGCCCGGCGACCGCGTGAAAAAGAAGGGCGACAAAGATGCGTCAGTTGCAATCGTCGTAGAGGTG
CHR	1298754	Rev	52.83	e11-								iTSS	HVO_1425	1425n2					3.14	-28	CTCGTCGTACGACTTCGAAGTGTTCGGCTACGAGGTCGACGTGAAGACCTCTCGCGACGTATCCGCGTTCC
CHR	1299138	Fwd	809.647	e011								intergenic		1425n3					4.29	-28	AAGTATTAATATCACAGTCTTTGTTGATATTTACAAGTGATTTTAATAGGTATTGTTGAGAAGGATACATA
CHR	1299359	Fwd	34.7233	e010								aTSS	HVO_1426	1426n1							AGGACGAAGGCCCGCGATAATCAATTACTATTTTGCAATATTTTGTGAAACTCGCTCCAGTTCTCGAACTG
CHR	1299544	Fwd	27.21	e1-0								aTSS	HVO_1426	1426n2							AGGCGAGTCTGAATCGGCGTCCCAGTCGCGGTAGAACGTCACTTCGTCCTGCGCCTCTTTGTAGAACGACA
CHR	1302453	Rev	4.8	e1-1								iTSS	HVO_1430	1430n							GCTCGGTATCGCGCTGCTGGTTGGCGCTGCTGCGGTGCTACTCATCCAGCGGGAGGGCAACGAGTAGGATG
CHR	1302466	Fwd	20.99	e0-1								aTSS	HVO_1431	1431n1							GAGCACGACCGCGCCGGCGATGGTCCCGATGGGCAGCTGCTTCAAGAACCAGAGGAGCATCCTACTCGTTG
CHR	1302679	Rev	26.2433	e--1								iTSS	HVO_1431	1431n2					4.49	-27	CCGGCGAGAAGGTCGACCTCGACGGTACCTTCACCATCACCGAGATAACTGCTCGCGACGGGTCTTCGGTG
CHR	1304808	Fwd	16.08	e11-								aTSS	HVO_1433	1433n				8.42		-28	CGACGATAACGCCGATGACCGGCTCGTCGACTTCGAACTTGATTTCCTCTACTCCGTCGTCGTAGTCGTCC
CHR	1305749	Fwd	9.28333	e11-								aTSS	HVO_1434	1434n				6.15		-28	CGTCGAGGTCCTCCCGAAACACGAGTGGATAGAGATCGACGATTTGACCCTGGCCGTAGTCCTTCCACTTC
CHR	1307307	Rev	34.1067	e11-								iTSS	HVO_1434A	1434An							CTCAGCTTTCATGCAACGGGTCGCCGCTGTCGGGCGAAATTAGAAGCCAAGGGGGGTGCATGGTAGATGTC
CHR	1307564	Rev	132.773	e011											HVO_1435	1307561	3	9.25		-28	GCGTATAAATCGCGCGGAGTCGCCGCCTCGAATCAATCCATTTAAAGCAATCCACGACAGACGAAGTCATG
CHR	1307656	Fwd	8.32333	e011	1307656	0			HVO_1436	284	LIP										TGCTTTAAATGGATTGATTCGAGGCGGCGACTCCGCGCGATTTATACGCGGTCTCCGAACAGTACGGGGTA
CHR	1308620	Fwd	701.937	e111								iTSS	HVO_1436A	1436An1				9.58		-28	TCCCGACGAGCCGGAACTGTTCGATCCTCCAATCAAAAAGGATATTACCGGCTCACTGTATCATCGTACTA
CHR	1308691	Rev	18.0767	e100								aTSS	HVO_1436A	1436An2					3.67	-28	CGACGAGGAGGAGGTTCGTGCCCGGTTCGACCTCGACGTCGAGATCAGCGCCCAGATTATACATACAGGTA
CHR	1308993	Rev	2.94	e--1								aTSS	HVO_1437	1437n				5.19		-28	CCCGCGGTCCTGGTAGTACTCCTGGAGGATCTCCGAGAGCTTGATTCCGATTCCGGTCATGTCGACCGGCG
CHR	1310862	Rev	29.8767	e111	1310862	0			HVO_1439	326	AA										CACCGACCTCCGACGAAGGGGGGACAACGGGATGAAAACGTTCAGGGTCAGGGGCAACTTTTGCCCGCGTA
CHR	1311372	Rev	83.95	e111	1311372	0			HVO_1440	107	CHY										GTGTTCGTGGCCGGTTTTCTCGCGACACCGCACCGGAAGTCGTACATGCCCCGAGTCCGAGAGGCGACACA
CHR	1312496	Fwd	7.61	e111								aTSS	HVO_1441	1441n				6.22		-28	ACCGCGACGAACAGCTGGATAGCCAGCGCCAGCACGATGGTTTTTTCCTTACGGAGACTGCCGAGTTCGCG
CHR	1315380	Rev	95.19	e101	1315379	1			HVO_1443	330	TP								4.32	-27	GAAGGGGAAGACTATCAATCCTGAAACCCTGCGCGAACGCTTTTTATGCCGTCCCGCGTGAAACTCTCTCA
CHR	1315516	Rev	96.0067	e-11			1315379	137	HVO_1443	330	TP							5.36		-28	AAGGTCGCGGCGGGCGACCTCGGCAAGAAGACGGGCAAGGGCTTCTACGAGTACGACTAAGTAGACGAGCG
CHR	1316047	Rev	12.1567	e--1								iTSS	HVO_1444	1444n				6.53		-28	GTCGAGGCGGCCGTCGAGAACATGGACGTGAAACGCGACATCTTTGCCGACCTCGACGACATCGTCCCGGA
CHR	1316387	Rev	25.14	e111	1316387	0			HVO_1444	286	LIP							6.85		-28	TAGTCACGAGTCTGTCACTATTCCGAACGCATCGGCAAGTTTTACCACCCTCCCTCGCGCAGACCCCGATA
CHR	1316499	Fwd	17.7467	e001			1316512	13	HVO_1445	320	CHY								2.25	-28	CGTTCGGAATAGTGACAGACTCGTGACTACCACGGGAAGACTCAAGTCGGGGGCAAGAATGGGGATATGCA
CHR	1318381	Fwd	29.95	e111								iTSS	HVO_1446	1446n					1.82	-28	GTACGGCTTCGGCGGCCGCGTCCCCGACTGGACCGACGACTTCGAGGCGTTCGCCCGCGAGGTCGAACAGG
CHR	1321825	Fwd	9.92667	e111								aTSS	HVO_1450	1450n							CGACTTTCATCGTCACCACGCCGCGCTCGCCGTCGGAGGTCTCACGCTTGTCGAGGACGGTCGTCTGCGCG
CHR	1322130	Rev	25.13	e110	1322130	0			HVO_1450	156	GEN							5.66		-28	TCGGGGCAATAGTTGTCACACGAGGCGGTCGACCGGCACGGTTTTATCACGGTCTGTCACACGCACCAGTA
CHR	1323707	Fwd	11.3467	e11-	1323707	0			HVO_1452	279	GEN										CCGCGGCCTCTGGCCCTGAACCGGGCCGGCGACGAGTCGATATTTCACCGCCCCCCTCGATACACACACCA
CHR	1324709	Fwd	76.1967	e111	1324709	0			HVO_1453	417	AA								3.29	-28	GTGTGTCTCAATACTGTGGTATGCTACAATCCCCGCTACGCTTAACCGGATGCCCGGACCGTATTAGGGCA
CHR	1326225	Fwd	49.2833	e111	1326226	1			HVO_1454	304	NUM							5.78		-28	ATGGTGGTGAATATCACTCGAAGCGTCCGATGCCGGGGGATTCAAGTCGGTGTAGGTCGCGTCATTCATCG
CHR	1327345	Fwd	56.48	e110								iTSS	HVO_1455	1455n					4.73	-29	ATGAACGTCCCCTCCGACCGCCTCGGCCGCAAGGACATCGTGAAGGTCGAGGGCCGCGAACTGAGCCAGTC
CHR	1329154	Rev	63.6333	e-01			1329130	24	HVO_1456	506	SIG							6.94		-28	TTCCTACTTGCGTTGATTAAGTGACAATTATCACAGAAACGTTATGGTATCAGTGACCATCCTGTCGGTCG
CHR	1329306	Fwd	10493.7	e110											HVO_1456s	1329307	1		3.15	-28	GTTTCCCGTCGGCGTCCGCGAATGCCCCGGTGTCGTAATCACTTAGTGCGGTGCGGTCGAAGTCCTCGGTA
CHR	1329538	Fwd	66.0533	e111	1329538	0			HVO_1457	291	CHY								2.18	-30	CGGCCGCGCTGGAGCGGGCCCCACGCCCGAGAGCGAACGACTTACCCGACGCCCGCGCGAAGGCGAAGCCA
CHR	1330583	Rev	109.043	e111	1330583	0			HVO_1458	37	CHY								2.97	-29	GGGGTGGACCCCCCAGCGGGACCGTCCGGAGCGCCGACTATCATAAGTGTGTGCAGTCCGGAGAACGTCCA
CHR	1331374	Rev	29.9767	e111	1331374	0			HVO_1459	238	GEN								2.73	-28	CGTCGGGCGACCGCCACGGCCCGGCTTCCGGTTCGGTGCATACTTGTCGCCACCCGGCGACGCCGGGAGTA
CHR	1335772	Fwd	5.68	e1-1								aTSS	HVO_1464	1464n							TCTTGCGCTCGTGGCCGCGGACGAGAATCACGTCGGGGTCGATTTCGAGGAGGTTCTCGTAGTCGAGTTCG
CHR	1336671	Rev	20.77	e001	1336671	0			HVO_1464	405	TP							9.87		-28	TCGCCTCGCCAAGGTTTAGGCCGGCCGAAAAATAGGAACGCTCTTATACATTTAGGTTAGCCTAAACCCCA
CHR	1337168	Fwd	25.4933	e111								aTSS	HVO_1465	1465n					2.2	-29	GGCGGAGTAGGTCTTGCCCATGAAGAACACCTCGCGGGCCTTCTTCTGGCCGACCTGCTTTGCGAGATACG
CHR	1337733	Rev	39.0267	e100	1337733	0			HVO_1465	305	COM								2.35	-27	AGGCGGCGGGCCGTCCCCCGAACCGCGGCCGCAAGCGAATCTTTTTGCGCCGCCCGCGCCGCCTCTCGGTA
CHR	1337803	Rev	4.04333	e--1			1337733	70	HVO_1465	305	COM										GGTGGTCGCGGCCGACATACGCGAGAGTCGTTCACGCACTGACAAATAGCTCCGGGCCGTGGGGGCGGTCA
CHR	1337856	Fwd	13.7	e--1	1337856	0			HVO_1466	154	CHY								4.43	-28	GGGGACGGCCCGCCGCCTGACCGCCCCCACGGCCCGGAGCTATTTGTCAGTGCGTGAACGACTCTCGCGTA
CHR	1338928	Rev	3.10333	e11-								iTSS	HVO_1468	1468n							TTCGTCGGGACCGGACTCGTCGCGTACGGGTCGTTTGCCGGGGCGACCGCCTTCCTCGTCGGCATCGCGGC
CHR	1339379	Rev	73.0533	e--1	1339379	0			HVO_1468	174	CHY								1.59	-28	TGACCGACTGAGCGACTGCCCGAACCGGTCGACCGACTGACTTTTCTCCCGCGCTCCGAATCGTGGTGACA
CHR	1343401	Rev	14.91	e111	1343401	0			HVO_1471	197	GEN										GCCGTCGCCCCGGTCGCCTGCGGGTGTCCGGAGTCGTTAGTGATAGGTGCGTCGGGCCGAAGATTCGAGCA
CHR	1343578	Fwd	638.61	e011			1343584	6	HVO_1472	70	CHY							4.8		-28	CCGGACGACCTTCGGAAAACCCGATTATTCCCCCGGTAGAGTTATATACGGCCCTTCCAAAGCGACGGACG
CHR	1343793	Fwd	177.267	e10-								iTSS	HVO_1472	1472n1					2.42	-27	GTCCGATGTCCGACGAGGACCGCGCGTACGAAGACGACGGAATGATGGGCCACGAAGACGAGTACGTCTTC
CHR	1343799	Rev	5.34333	e--1								intergenic		1472n2							TTCGTCCTTGTGCATGAGCGTTGGGTAGGTTCGAGGGCGGTTTAAGCGTTATTGGGGGATACTGTCACTCG
CHR	1343855	Fwd	950.683	e111	1343855	0			HVO_1473	92	GEN								4.24	-30	TACGTCTTCTGAGCCGAGTGACAGTATCCCCCAATAACGCTTAAACCGCCCTCGAACCTACCCAACGCTCA
CHR	1343983	Rev	7.50333	e--1								aTSS	HVO_1473	1473n							TCATCGCGGTCGCGAGAGCGTTGCCGAGCACGAACACGGCGTGTTTGTGTTCGCTTTTCGATTTGTGGACG
CHR	1345218	Fwd	7.48667	e10-								iTSS	HVO_1474	1474n							TCGGGTTCGCGCTCGTCGTCGCGCTCGCGACCATCGTCGCGCTGACGGTCGCGGCGTCCGACAAGCCGCTT
CHR	1347168	Fwd	13.55	e110								intergenic		1476n							GGGGGCCCGCGGATATCCCCGCGAACGTGACAACCTATAGACTAATGATGGAAGATGTCGTACCGCCGTTG
CHR	1348306	Fwd	211.243	e-10			1348391	85	HVO_1478	317	TC							5.51		-28	GCACGTCTGACCATTCGATTCACCGTTAGTCAGGGAACTGTATAAGTAGCTGCGTCCGAATCCCCCGAATC
CHR	1348335	Rev	16.5433	e111			1348249	86	HVO_1477	327	MIS							5.25		-28	GCTCGGACGTTCCATTAAAAGGTTTCTGGTGGAGCGTGAATTTAAACCTTTGTAACAGAAATATGATAAAG
CHR	1348367	Fwd	61.55	e01-			1348391	24	HVO_1478	317	TC										CCCCCGAATCCGAGCTCGTCGAATCGCCAGACAGCGGCCTTTATCATATTTCTGTTACAAAGGTTTAAATT
CHR	1348390	Fwd	1363.79	e011	1348391	1			HVO_1478	317	TC							9.14		-28	TCGCCAGACAGCGGCCTTTATCATATTTCTGTTACAAAGGTTTAAATTCACGCTCCACCAGAAACCTTTTA
CHR	1351474	Fwd	270.313	e-11	1351477	3			HVO_1481	163	GEN								3.02	-28	GCCATTCTGTCGTTCCGAGACGACGGGAACGAGGAGTAGTGTTAACCCCGTTCCGAACTAAGTATAATTCG
CHR	1353387	Fwd	3.2	e--1								aTSS	HVO_1484	1484n					1.45	-28	GTACGCGCGCCGGCCGCAAGAACGCTACGCGGACCGAAGAGAGAACAGTGACGCGCTACTCCGACGTTCCG
CHR	1355280	Fwd	16.7467	e--1	1355280	0			HVO_1485	211	CHY										GATAACCGTGAGAATCTCGTTCTCGTGGGCCGGACCGAACGTTCACGTCGCTGGCGGACCGAGAGGCGGTA
CHR	1356016	Fwd	16.4067	e111	1356016	0			HVO_1486	194	GEN								1.97	-31	CCAGCCCCGCACCGCCCAGCCCCGCACCGCCGACCCAATCTATTCGTGTCCCCGAGTGGTAGCCGATGGTA
CHR	1359238	Rev	214.26	e011	1359238	0			HVO_1488	412	CHM								3.53	-30	CCCTCGAGACCCGAGCGGAGAGCTGTCCCGGTCGGGAAAACTTTACTAACGTCCGAGTAAACTACCCTTCA
CHR	1359771	Rev	16.0133	e10-	1359769	2			HVO_1489	148	CHY								3.41	-27	TGCCAGTCTCTCGCGGGGGTCTGACCCGCTTCGGCTCTGTCGTTATCTTCTCGGAGCGCGTACAGTCGTCG
CHR	1361373	Fwd	57.2	e111								aTSS	HVO_1491	1491n					4.09	-27	CGTCGTCGCTGCCGGTCTCGAAGTTCGGCTTGAGCGTGACGTTGAACTCGTTTCCCTGCAAGTGGACGCCA
CHR	1362005	Rev	31.5167	e101	1362005	0			HVO_1491	408	GEN								2.4	-28	CCCGACGAGCCGCCGCGAGGCGACCCGCCTCTCACGCGGCTTTAATGCGGTTGGGTGACGACCCCGAGTCA
CHR	1362157	Fwd	9.24667	e--1	1362157	0			HVO_1492	147	CHY								1.58	-28	GGTCGGTCGGGGTCGTCCGCGGTCGATCTGCCCCGCAACTCTGATACCGACCGGCCGACGACGTGTGCACA
CHR	1362869	Rev	1144.17	e111	1362869	0			HVO_1493	49	CHY								1.36	-29	TCTCGGGGATGGGGGGGTCGAATCCGACGCCCCCACGTCGTTTAAGGCGTCACGCGGCGTGGGTGTAGGTA
CHR	1366398	Rev	10.2467	e101	1366398	0			HVO_1496	565	CIM										CGACGACGCGGAAGCGGCACTCGACGCCCTAGAGGATATCCTTTCCACGCCTGAAGCCAAACAGTAAGCTA
CHR	1367617	Rev	14.8533	e--1								iTSS	HVO_1499	1499n1							GGGCATCCTCGGGGCGATGATGGCGGCCGACATGGGCGGCCCTATCAACAAGGTCGCCTACGTGTTCTCCG
CHR	1368014	Fwd	7.67667	e11-								aTSS	HVO_1499	1499n2							CGCCCTGGAGACCGATGACGTCACCGGCCGCCTGCAGGACGTTACCCTGCTGGATGATGTACGACAGGATG
CHR	1368136	Rev	11.57	e--1								iTSS	HVO_1499	1499n3							CGGAATCTTCCTTGCGCTGGGCTACGCGGTAGCCTCGCTTTCGAACAACGTACAAGACGTGTTCAACAGCA
CHR	1369677	Rev	6.60667	e--1								iTSS	HVO_1501	1501n1							GATACTCGGCGTCACCAACTCGCCGCGGCTCGCCATCGAACTGAACGAGGAGGACAACGAGGTCAAACTCA
CHR	1369903	Fwd	3.10667	e1-1								aTSS	HVO_1501	1501n2				6.06		-28	CGACCGCGCGGTCCGCGATTGCGCGTTTCCCTTCGAGATTCTGTACTTCCTTCTGGCCGTAGGTCTGCTCG
CHR	1371274	Rev	22.75	e--1								iTSS	HVO_1503	1503n1							GGGACACGACGGCGCTCATGAAGTCGAACGCCGACGCGGTCGCCGAGAAAGCCGCCGCCCTGCCCTACGTC
CHR	1371289	Fwd	10.05	e0-1								aTSS	HVO_1503	1503n2					3.44	-26	GATGACCTCCGCGCCGATGCCGTCGCCGGGGATGACGACGATTTCCTCAGTCATCGACGTAGGGCAGGGCG
CHR	1372461	Fwd	5.64333	e--1								aTSS	HVO_1504	1504n					1.41	-28	CGACGCCCTGTCCGGGCGTGGTCCCCCACGTCACGACGGGTTCGAGTTCGGAGCCGTCGATGGTGACGACG
CHR	1377265	Rev	30.91	e011	1377262	3			HVO_1509	33	CHY							7.35		-28	ACCTCCCGACCGGCGTGCAATCGTTGCCCGCCGCGAAAACATTATTACCGACGGGACGGACGTGTTGCATA
CHR	1377322	Fwd	24.29	e101								intergenic		1509n					4.32	-26	TGCGAGGTCATCGTATGCAACACGTCCGTCCCGTCGGTAATAATGTTTTCGCGGCGGGCAACGATTGCACG
CHR	1377983	Fwd	14.9533	e10-								aTSS	HVO_1510	1510n1				6.39		-28	CGAAGCCGGCCATCGCGTTCGCCGACGCCAGACCGAAATCGTCGTGCGCGTGCACGTCGATTCTCGCGTCG
CHR	1378338	Fwd	28.9967	e-11								aTSS	HVO_1510	1510n2							CACCATGTCCACGCCGGAATCCAGCGCGGCTTCGATATCCTTGTCGACGACGCGGGCCAACCCGCACGTCG
CHR	1378513	Rev	40.5867	e--1								iTSS	HVO_1510	1510n3					3.29	-27	CCGGCGGGTCGAGTTCTTCCAGGGCACATTAGCCCAACAATCTGAAATCGAAGACGTACGAATCTTCGACA
CHR	1378756	Fwd	14.9433	e--1			1378985	229	HVO_1512	95	CHY										GGGTGTTGTGTGACAACCACTCTCGGGGGTAATCGCTGTACCTAAACGTCCTTATATGATATCATGACATA
CHR	1378794	Fwd	55.5867	e-1-			1378985	191	HVO_1512	95	CHY										TACCTAAACGTCCTTATATGATATCATGACATATGTTGACTTGATATGTCCGCTCGTCGTTCGATAGCTTC
CHR	1378985	Fwd	111.88	e101	1378985	0			HVO_1512	95	CHY							7.38		-28	GTGTTCGTGCCGTCGAGGCCGTTCACTGCTCGACCGAACCCTTTTCTCGCCGCTCGACAACCGAGCGGGTA
CHR	1379388	Fwd	23.0067	e111	1379388	0			HVO_1513	228	GEN								1.8	-30	GAACCGACCAGAACCGGGCGCATCGGCCGCGGGGAGAGTTCTTATGCGCCGCGCGCCCCACGATACTGGCA
CHR	1380500	Fwd	2.10667	e--1								iTSS	HVO_1514	1514n							CCGCTTTCTCACGCACCCGCAGGGGCCGTTCGAACTCACGGAGCGCGACGGCCTCGCGGCCGTGGTGCTCC
CHR	1380743	Fwd	37.09	e111								aTSS	HVO_1515	1515n				5.59		-28	ACTACCGCAGGTAGCCGAGGTCGGTCAGTTGCTCCGCGATTTCTTGGAACTCCGCCTCCGAGAGATCGCCG
CHR	1380886	Rev	115.373	e011	1380886	0			HVO_1515	70	GEN								3.98	-28	CGGGAAACCGCGCTGGACGGTCCCGGTCGCCACCGTTGGGGTTAACCTCGCCCGGTGCCACGGTCGACCCA
CHR	1381017	Fwd	4.62333	e1--	1381022	5			HVO_1516	108	CHY										CGGTTTCCCGGCGTTCACCGGCGATTTCGCCGGAGGTCGGGGGTTTTTCCATGCGGGGCGTACTATACACG
CHR	1382312	Rev	101.107	e-10	1382311	1			HVO_1517	303	MIS							8.08		-28	ACATTTGATTATCACCAACTGTGTGGACCAAACGATAGACTATTTTATTCAGCACAATCATATCGAGACTA
CHR	1382425	Fwd	16.9433	e11-								intergenic		1517n							GTCCACACAGTTGGTGATAATCAAATGTGGACTGATATTAGTCTATCAACTCACGGTGAGATATAATCAGA
CHR	1382477	Fwd	45.9433	e--1			1382710	233	HVO_1518	452	ISH							5.55		-28	ACGGTGAGATATAATCAGATTGTCCCATTGACAACTATAATTATCAGACTACAACCTCTCGATTTGGACTG
CHR	1382632	Fwd	21.96	e--1			1382710	78	HVO_1518	452	ISH								3.52	-27	ATAATTCGTACGTAGGCAGTTACACAACAGTCCACGAAAGACTCACATCAGCGCGCAACACAATAACATCA
CHR	1382737	Rev	51.99	e01-								aTSS	HVO_1518	1518n1				7.41		-28	GTTGCGCGAGCGCGCTCGCGCAACTCATCAGAGGGAAACGCTCTTTGAATCCGGTCAACTATGACCGAATC
CHR	1383057	Rev	49.94	e-1-								aTSS	HVO_1519	1519n				10.29		-28	GTGAGAGAGCAACTTCCTCGTCAAGAGAGTTGACGAGGAAGTTAAGGAGCTGGTCCTCGTGGATTTCATCG
CHR	1385148	Fwd	9.27	e111								iTSS	HVO_1518	1518n2							GCTGTTCAAGGAGTTGAAGTCGCGGTTCGGCTTGGACGAGATCAAGACGACCGACGGCTACATCATCGAGG
CHR	1385189	Rev	3.19333	e--1								aTSS	HVO_1518	1518n3							CGAGTCGGCGTCTGCGGCGGCTTCGCCCTCTCTGTCTTGCCTCAAGTGACCGCAACTCATCCACGATTACA
CHR	1385721	Fwd	13.7933	e-1-								aTSS	HVO_1522	1522n							CTTTCGGGTCAACACCAGCGTGAATCTCAACTATTACAAAGTTAACTGACTGCAATGCATTGGTCATACCT
CHR	1386612	Fwd	33.83	e111								aTSS	HVO_1523	1523n1					3.73	-28	TAAATGTCTCCATCGCCGCAGGCACTTCGAAACCAGGAGGATTGTATGGGTGCGAGAACTTGTTATCCGTA
CHR	1386757	Fwd	332.083	e01-								aTSS	HVO_1523	1523n2					3.97	-27	AGACGGAAATTCTCTTGCGAGTATTGCAAGAGCATAGAGGTTAAACGAATGGTAGCCCTCAGCTTTGTTCC
CHR	1387374	Fwd	198.937	e001								aTSS	HVO_1523	1523n3				5.4		-27	TAAATCTATTTTCATCCGTAAGTTCGTGGGCCTTCAGAAATGTTACTAACCAGTGAGACGTGTTTCGAACA
CHR	1387540	Fwd	20.79	e--1								aTSS	HVO_1523A	1523An1				6.61		-28	AATGTCAGAAAGAGAGGTCATTGTTCCTCCGATCTTAGGATATAAGAAAGACGGCCAGCATTCTCTGCGAG
CHR	1387590	Fwd	46.9133	e011								aTSS	HVO_1523A	1523An2					2.18	-29	ACGGCCAGCATTCTCTGCGAGCCGACAGCACCACGCAACCACAAGTATTCTGACGAACATTGCTTTCGTCA
CHR	1387888	Rev	55.9633	e001								iTSS	HVO_1523A	1523An3				5.14		-28	AGAGAGCATATCTAAACGAAACGTGGCGAAGACGGTAAATCTCTTTGTTAGACAGGATGTCGTTGAGGACG
CHR	1387950	Fwd	18.6633	e111								aTSS	HVO_1523A	1523An4				7.25		-29	CGGACCAACGTCCTCAACGACATCCTGTCTAACAAAGAGATTTACCGTCTTCGCCACGTTTCGTTTAGATA
CHR	1388058	Rev	135.783	e001								iTSS	HVO_1523A	1523An5							CTTGCTTTTTTAGATGGGGATTGTTCTCCACACCAACAGTGGCTTGAACGCGGCGTGTCTACAATCTCCGG
CHR	1388170	Rev	91.1067	e0-1								iTSS	HVO_1523A	1523An6				9		-28	CGCTCGTCAGTTTAGCACTGCTTACGACAATCTCGAAATTCTGATTGAGGATGAACAACAAGGGTCTTATG
CHR	1388319	Fwd	24.5167	e-11								aTSS	HVO_1523A	1523An7							CGTACCATCCTGTGATCCATTATCTACGACGAGTACTTCATACTTTGACTTGGGGTACGTCTGTGATGTTA
CHR	1388541	Fwd	46.64	e111								aTSS	HVO_1524	1524n1							ATAGCAACTGTTGAACTCGTTCTCGAAAGTTCGACGAGAGGCTAAGAAGGACAAAGCCGTACGTAGTGGCT
CHR	1388783	Rev	360.56	e001								iTSS	HVO_1524	1524n2				6.1		-28	CAATGCTTTAGATCTACCTGACAGGACATTTAGAATAGGAGTTATCTTCATCACGACTAATATTATACTTA
CHR	1388818	Fwd	6794.16	e01-								aTSS	HVO_1524	1524n3				7.49		-27	GCCAATCACACCGAACATCGGTATCAACGATACGTTAAGTATAATATTAGTCGTGATGAAGATAACTCCTA
CHR	1389590	Fwd	555.553	e111								aTSS	HVO_1524	1524n4							TTCGAGACGAACATACCACCCACCAGTTGTGTACCGCTGTAATCAAGGTACTGTTCAACGAAGGGAGAGTA
CHR	1389866	Rev	103.483	e011								iTSS	HVO_1524	1524n5							GATGCTTTGTGAGGTACTGATAATTTATCAATTGCAAAGTCACAACTACTCTATGGCCAAATTAGCACGCG
CHR	1391245	Fwd	166.247	e01-								aTSS	HVO_1525	1525n				10.29		-28	GTGAGAGAGCAACTTCCTCGTCAAGAGAGTTGACGAGGAAGTTAAGGAGCTGGTCCTCGTGGATTTCATCG
CHR	1391455	Fwd	55.6267	e011	1391458	3			HVO_1526	457	MIS								4.25	-30	TTCGCAGTGCAGGAATCAAGTAACAGGGGAAACAGCAGAGTTATTCTATGTTGCTAATAGAGAGCCAAGTA
CHR	1391579	Rev	148.16	e-01								aTSS	HVO_1526	1526n1					3.23	-28	TGCATCGATGTAATATCTCTTTCCACTGAAAACCATCCATCCTATATGCTGAAACATTGCTGTATCTGATG
CHR	1391698	Rev	67.7433	e011								aTSS	HVO_1526	1526n2							AAGATCCCTGCTACTATTGTACTTACGACAGATAGAGTGTGTTGAAGATGCGGATCCCCATTAGAGATATA
CHR	1391750	Rev	28.2433	e--1								aTSS	HVO_1526	1526n3				4.98		-28	GAACTGATTCCCAGTGATTTCTGAGGTGATGTGGGAGATTAAATATGTTAGCAAGATCCCTGCTACTATTG
CHR	1392134	Rev	147.15	e011								aTSS	HVO_1526	1526n4				6.17		-28	ATATAAGAATGATTGTGTCTCACCTGCATACAACGGGGCAATTATCACTTCAACAGTCATTGCAACTAGCC
CHR	1392173	Rev	46.4233	e011								aTSS	HVO_1526	1526n5				7.17		-28	GATCATTAATTTTAGATGAGTGACTCCTTTTACCAACCGATATAAGAATGATTGTGTCTCACCTGCATACA
CHR	1392304	Fwd	35.7233	e--1								iTSS	HVO_1526	1526n6							ATTAATGATCCCGATAGCACTTCTTGGAATGGCCGGTATATTACTAGGCTTTCTAGACGACATTCGAGAAA
CHR	1392846	Rev	98.96	e-10								intergenic		1526n7				8.35		-28	GCGATAGTTGTCCACCCTATACCGGTTGATCACAAGAAAAGTATAAGTTAATATATGGCCAATTTGGGTTG
CHR	1392982	Fwd	108.793	e01-			1393000	18	HVO_1527	243	CHM										ATCGCAAAGGAGACGTTAAACTCAAAGCCTATCAACAGTCTTTATATCCAACTCATTTTATATACTTGGCC
CHR	1392999	Rev	37.1033	e--1								intergenic		1526n8							CTTTCGGCTTGTCTTCAGTGAGTGGTCGAAGACGGGTTCCTTTACCGGCGGCGAGGACAACAGCTTGCATA
CHR	1393309	Fwd	21.75	e0-1								iTSS	HVO_1527	1527n1				9.03		-28	GCAGAAAGGTCTAGCACACGCCCTCCTCACCGTCGAAGACCACATTGACGAGGACTTCATGCTGATGCTTG
CHR	1393324	Fwd	32.8467	e101								iTSS	HVO_1527	1527n2							ACACGCCCTCCTCACCGTCGAAGACCACATTGACGAGGACTTCATGCTGATGCTTGGCGACAACATCTTCA
CHR	1394340	Rev	22.32	e110								aTSS	HVO_1528	1528n1							CTCGAACTGGGTGGTACAGTGTCGCCGCCGGTGCAAACGCTTGCCTGTACCCGGCGTTTGCGACTCGACTG
CHR	1394600	Rev	27.2933	e10-								aTSS	HVO_1528	1528n2					2.51	-26	ATTTCAGCGGGTGTTCCCGCGAACGTATCGGACGTACTCACGATAATACCCGAGGGCGCGAACTCCTGTCA
CHR	1394707	Fwd	16.8033	e111								aTSS	HVO_1529	1529n1							CGTCCGATACGTTCGCGGGAACACCCGCTGAAATGCCAACTAATTATTCGTCTTCTCCACGAGGTTCGGCG
CHR	1394997	Fwd	56.0533	e111								aTSS	HVO_1529	1529n2				7.62		-28	GAAAGACGAGCCAGTCAAACTCAGTTCGATATTCGAAGAGTTTGTGATTCACGCGCGCTTGTTTGTTATAG
CHR	1395083	Rev	29.5733	e--1								iTSS	HVO_1529	1529n3				5.13		-28	GAACACCTACGGCTCGAACATCTCCTTCAAGCGCGACGTTTTTCTCGAAGTGGGCGGCTACGACACGAACA
CHR	1395617	Rev	225.643	e001	1395617	0			HVO_1529	313	MIS										TGTCGGTAGAAATAGCTAGTTACAAATCGAAGGACAATGCTTATTCGGGACTCCTCGGTAACTCCGACTTA
CHR	1395647	Rev	76.2133	e01-			1395617	30	HVO_1529	313	MIS										CAAGCTGTTCATAAGCCTTGTGATAGTCTGTGTCGGTAGAAATAGCTAGTTACAAATCGAAGGACAATGCT
CHR	1395704	Fwd	67.4367	e01-			1395734	30	HVO_1530	1054	MIS							5.95		-28	GGAGTCCCGAATAAGCATTGTCCTTCGATTTGTAACTAGCTATTTCTACCGACACAGACTATCACAAGGCT
CHR	1396117	Rev	11.1567	e--1								aTSS	HVO_1530	1530n1							CACCGAAGAGCCCACCGAGACGGCCGCCGAGACGCTTCCCAATAAGGTAGGTTGGGATAACGGTTAACGCA
CHR	1396120	Fwd	29.8967	e-10								iTSS	HVO_1530	1530n2							TCGGTCTGGGAAGCCCGTCATCAGACCTCGTAGCCAAGTCGCTTTTGGTCGCGCCGGCCGTCTTCGGTGCG
CHR	1396354	Fwd	12.52	e--1								iTSS	HVO_1530	1530n3							CCGTCCTCGCGATCATGATCGCCCTCACGGTTGCCGACAGAGAGAAACCCGTCTGGGAACTCGTTGCGGCA
CHR	1396540	Rev	20.5833	e111								aTSS	HVO_1530	1530n4							CGGTCACCCCGAATCCCGGTTCCTCGATCGGGATGAACATCAGTAAGCCGGTGACCGTCATCGAGATGGCA
CHR	1396954	Fwd	8.63667	e--1								iTSS	HVO_1530	1530n5					4.37	-30	ACGTACTCCAGTCGAACGGTCAGACTGCTGTCGGCCGTATCATGTCCGAGTACGGCTTCACCTTCTTCACA
CHR	1399863	Fwd	5.41	e--1								aTSS	HVO_1531	1531n					4.44	-28	CTAGCGTCTCGTACGCCCGGTCGGTCTGCGCGCCGAGGACGATTTTGTCCGGCGAAAGGAAGTCGTCGACG
CHR	1401796	Fwd	17.9667	e11-								intergenic		1533n							GTAAGCGTTGTCCTGATATTCACCAAATTACTCTAGTACATTAATATTCTACGCCGGCATGGACACTCGAA
CHR	1402422	Rev	32.1	e111	1402422	0			HVO_1534	184	GEN								1.49	-28	TATGCACGAGACAAACACGACTCGGGGAGGAACCGATGGGACTTACGGCTCGGGACGCGGAGTGAATCGCA
CHR	1403517	Rev	19.6733	e111	1403517	0			HVO_1536	226	CIM								3.3	-27	CGAGAGCGCAGGCCGCGGCGCGGTTCTCCCCGACCGCTGAACCTTTTTCCCCCGTCGCCCAACTCCGGGTA
CHR	1404845	Rev	40.1633	e111			1404828	17	HVO_1537	400	MIS								4.14	-27	CGTGTTCTCATTCAACACGGTGGCTGTCGGTAGTGGTCGGTTTTTACGCGTGCGCCGGATACCGTCAGCCA
CHR	1404994	Rev	19.7233	e11-			1404828	166	HVO_1537	400	MIS										ACCGTATCTCGGCGTTTCTACGCCGAATCAAAACGACGGCAATAATTCAAAACCATTGTTACTATTAGTTA
CHR	1407495	Rev	6.25667	e11-								aTSS	HVO_1539	1539n							CCTCGGCGACGGTGTCAGCGAGGACGGAGCGGACCGTGCCGCCGTCCACGTCCTCGTCGCGGTCGAGCGCC
CHR	1408353	Fwd	26.6933	e111								iTSS	HVO_1540	1540n1							CAGCACCGATATGGACCTCCGTCCCGGCGCGGACAACTGTTACAAGTGCACCGCCTGCGACGTGTCCTGCC
CHR	1408769	Rev	4.50667	e--1								aTSS	HVO_1540	1540n2				6.5		-28	TGTTGTAGTTGGAGTAACAGCCGTGGAAGTAGGCGACGCGCTTTTCGTCGGAGCGGACCTGCGGGCCGCCG
CHR	1409827	Fwd	60.4867	e111			1409871	44	HVO_1541	510	CIM							11.41		-28	TCATAAACGCCACAGTATGCGGGGCAGTAGTAAAGAAACATTTATCATATAATTTGTACACGTTTGTAGTG
CHR	1412088	Fwd	40.77	e111								iTSS	HVO_1542	1542n							GAGCGGCCGGCCCGCGACCGAACCGTGGCTCCCCCACCAGTACAAGTGGGTCAACATCGTTGTCATCGGTC
CHR	1412569	Fwd	31.2033	e111	1412569	0			HVO_1543	91	MIS								2.4	-27	TCGTTCACGATTTTTCTGCGCCGCGTTCCGCAACCGGTAGCGATAACGCTCCGCGGTCGATACCCGACGTA
CHR	1414009	Rev	182.297	e111	1414009	0			HVO_1545	232	CIM								1.75	-27	GTCACCGATTTTTCGCGGCAGAACAGTCCCGCGGGACAAGGGATTAACCCCCGGCCGACGAAGGTCAGCCA
CHR	1415136	Rev	23.5367	e010	1415131	5			HVO_1546	332	CIM								2.39	-28	TTCGCAGACGGCGACCGCCTCGACTTCCGACTGACCAACACTTTTGGCCTCATCGAACGTGAGGGACGGTG
CHR	1417366	Rev	5.75667	e--1								iTSS	HVO_1547	1547n					4.46	-28	GGAGGACTTCGCCCGCGGGCAGGAACTCGGCCTCGACGTGTTCGTCCCCGTGGACGACAAAGGCGAGTTCA
CHR	1418428	Rev	166.86	e011	1418428	0			HVO_1547	1043	TL								4.31	-27	CCCGGCGGCACGTCCCGCCGACGCGGACCAGACCCGCCGTTTTGATATATATCCGCGAGAAGGACGGGGTA
CHR	1419417	Rev	13.97	e11-	1419417	0			HVO_1548	202	CHY								4.76	-28	GGACTTCGGCTGAGCCGCCGGGACTCGCGTCACGGCGGACGTTTATGTCGTTCCCGCGCCACACGACAGTA
CHR	1419930	Rev	5.59667	e-11	1419930	0			HVO_1549	151	CHY							4.84		-28	GGAGTAGGGCGGACGCTCCCACCGACGACAGCGCCGAACTCTTTTCCCCCGCGGCGACCGACTGGCGACCA
CHR	1420476	Rev	35.4033	e111	1420476	0			HVO_1550	160	MIS										CGACGAGTGACCCGGGGCCGTCGCCGCCGCGCCCCACGATTTCAAGCCCCCTCGGCGTGACCCTGCTCGCA
CHR	1421682	Rev	32.7333	e111	1421682	0			HVO_1552	206	REG							5.36		-28	CGTCTGAGCGCCGGCGATTTTCGGCTGGCGGGACAACAGGTTTGTATCCTCCGGCGGAGTACTCCACGCCA
CHR	1422920	Rev	13.3333	e-1-								iTSS	HVO_1553	1553n							CCCGACCGCGTCGTCCGCGAGTCGGTGTCGCTCGACGGCGACACGCTGACCGTCGCGGACGAGACCTACGA
CHR	1423127	Fwd	87.43	e101	1423128	1			HVO_1554	561	GEN							6.42		-27	CGCGTCGAACTCCTGCATAGTTCGTGGGAGATGCCGACACGGATAAAAACCGTGGGGCGGTAAACCCGGCG
CHR	1424591	Fwd	14.9767	e011								iTSS	HVO_1554	1554n					2.18	-27	AACTCCGCCACACGCCGGTCAACGTCGGTGACATCGGCACGCTGAACGAGCTGCTCGACGACGAGGAGACG
CHR	1425943	Fwd	17.5	e--1								intergenic		1556n1							GATTCCGGACATCGTCACTTCTGCATACGACAGGGACCATAATATAAGGGACCGAGCGTTACCGTGAATTC
CHR	1426247	Rev	105.59	e011								intergenic		1556n2				4.89		-28	GAGTCGTCGTTCGTCATGTTCGTGTACGAGATAGGCCGAAATATAAAATCACAGGGTACGAATCATACACG
CHR	1429341	Fwd	11.06	e--1								aTSS	HVO_1560	1560n							GTGTTCCGGTCGCTCACCGGAGATGGGAGTCGCCGCGTTACTGCTCTTCGTCGGAGTCGAACTCGCGGATG
CHR	1429667	Rev	663.553	e101	1429667	0			HVO_1560	119	GEN										GCGTGTGAATCCCACGCGCCCCGACACTCGAACCACAAGACACGAAACCCCACCGGCGCGTAACGTATGTA
CHR	1430013	Fwd	63.54	e010			1430025	12	HVO_1561	57	CHY								1.67	-29	AGACAGCGTCGGGGTGTTCCGCGTCGGATTGAGAGAAGATTTATATACTGGCACCGCCCGAGCCTCGACTG
CHR	1430346	Fwd	278.96	e010	1430347	1			HVO_1562	243	CP							7.73		-27	CTGACGCTTTGGCACCGGCAACGGAGAGGTGAAGGGTTGCATTTATCAGCGCCGAAGTGCAATCGGAGACA
CHR	1431596	Rev	251.217	e111	1431596	0			HVO_1563	125	CHY								4.56	-28	CTCGCCGGCCGCCGACGCTCTCACGTCTTGTCGGAGAAATAACTATTACTGCGTCCCGCGAAGACCGCGTA
CHR	1431866	Rev	3.01	e--1								iTSS	HVO_1564	1564n					4.62	-31	CGGGCTTCGGCTCGCGGGCTGTTCCGAGGAGGAGGCCAACTACTATCTCGAACCCCTGCGAAAGCGCGTCG
CHR	1433237	Rev	111.82	e1-0	1433237	0			HVO_1564	509	GEN							4.87		-28	GGGATGTGATTCGCTGTCGAACGTCCGGAGTGCCGGGAAGTTGAAGGCGTTCGACGCCAGAACGCCGGGTA
CHR	1433355	Fwd	10.9733	e--1	1433356	1			HVO_1565	585	RRR							6.44		-28	CGTTCGACAGCGAATCACATCCCCGACGACTGTCGAGACGCTTTTGCCCCGCGCGGCGATACCCACGGACG
CHR	1435666	Fwd	20.98	e110	1435666	0			HVO_1567	235	GEN								3.62	-26	GCCGCTTGCCCTTCGCGGCCGACTCGGCCCGAGAGCCGCGCTTTTTACCCCTCGGTCCGAGGTGTCGCGTA
CHR	1435840	Fwd	5.96	e11-								iTSS	HVO_1567	1567n				6.24		-28	CGGCGTCCTCGACGACTACTACGCCCGCGACGGCGATCTGATTTTGGTCACGCACAACCACCACTACGACT
CHR	1437398	Fwd	66.3167	e110	1437398	0			HVO_1569	72	HY								2.09	-27	ACGCCACCGAACCGAATCCGAACCCTCCGCGCGGCGACAGGCTCATACAGCGGGCGACCGTCGAACCGCCA
CHR	1438573	Fwd	3.74667	e--1								aTSS	HVO_1570	1570n					1.73	-27	TGGTGTAGGCGGCCTTCAGGAGCTTTCGCGCCCCCCGAACGCTGTTCGCAGAGCGCTTCGAGGTCCGGTCG
CHR	1438773	Fwd	14.6533	e1-1								aTSS	HVO_1571	1571n							TCGCGGGCGCGTTCCTCGGATGTCTGCTGGTCGGATGCCATTATACGTTCACCGTGAGTTTCTCCGTCTCG
CHR	1441145	Rev	116.823	e011			1441139	6	HVO_1571	798	RRR								3.47	-28	GTCAACGCCCCGAGTTCACTTTCACTCCGCTGCCGGTGAGTACTTAACGCGGGACTGGGTAGATGCGCATC
CHR	1441929	Rev	4.69667	e1-1								aTSS	HVO_1572	1572n					1.23	-27	AGTTGAGGAACGCGAGCTCTCGCAGGCGGTTTTCGAGCGTCTTGAAGTCGAACTCGGTCGTCTCGAAGATA
CHR	1444075	Rev	18.5967	e111								aTSS	HVO_1573	1573n				7.25		-28	CCTTGTTCTCCTGATACGGGAGTTCGTTGATGACGATGCGGCCTTCTTCCTCGAACACGTCGTAGTCGGCG
CHR	1446004	Fwd	46.58	e--1	1446004	0			HVO_1573A	138	CHY										CCCGCCGGAGAGCCGCGGCTCCGACCGTCGCTCCCCGAAGACATTTATCTCGGCCGGAGGTCCTACCGGTA
CHR	1446887	Rev	72.6833	e011								iTSS	HVO_1574	1574n					2.03	-29	AACGAGACTGCGACGCTCGCGACCGAACTCGCCGCAAGCGCCTTCGGCAAGCGCATCCTCTGATGTCGACG
CHR	1447794	Rev	75.1	e001	1447794	0			HVO_1575	299	AA										GGTGACAGATAGCATTATCAATAAGGGTGTTTTCCGATGCCACTAAACGGCCCGAACGAGTGGGTCATCTA
CHR	1447866	Fwd	12.16	e111								intergenic		1575n							GATGACCCACTCGTTCGGGCCGTTTAGTGGCATCGGAAAACACCCTTATTGATAATGCTATCTGTCACCTC
CHR	1448819	Rev	120.2	e101	1448819	0			HVO_1576	306	GEN								2.86	-28	TCATTCCGAACCTCGATTCGGCCTCGATGCTGTCGATAGCACTATACGGCTCACGAGACTCCGGTAGCACA
CHR	1448985	Fwd	1423.05	e011	1448985	0			HVO_1577	177	GEN							5.76		-28	AAAGTAGACGAACGGCAGATTCGAGGCGTCATCCATCGGATTTAAGGACGTATGTAGCGAACCATTCTCCA
CHR	1450959	Rev	142.073	e001	1450959	0			HVO_1578	397	EM							5.77		-28	CGGCCAAAATCACCCCGGCTGTGGAGACGGTTTCAAAGCCCCTTTATCGGATGACTGCGCATCCGACGACA
CHR	1451493	Rev	8.87	e--1								iTSS	HVO_1579	1579n					2.27	-28	CCTCGTCATCACTTCGGGCGCGGTCCGACAGGAGGGCACCTCCAAGGAGTACGTCCGAGAGGACTACCCCG
CHR	1451892	Rev	10.2467	e--1	1451892	0			HVO_1579	272	NUM							5.42		-27	AACGCGACGACGCCCGCGATGACCCCTCGGAGAACGCAAGAATTTCCATCGGTGGCCCGCGAGTAATGCCA
CHR	1453521	Rev	50.1367	e110	1453520	1			HVO_1581	140	NUM								1.6	-27	GCGTCTGCCGGCCGAGGCGACAGTCTCGGGGAGCCGAACGAACTAAGCCACCCCACGCGAATGAGCGCCCA
CHR	1454019	Fwd	9.06667	e--1	1454019	0			HVO_1583	89	CHY							7.26		-28	GGGCGTATCGACCGTGGAACCCCGACCGGAAGGCGGACCGTTTTTGCTCGTCGGGCCCCGACGGACCCGCA
CHR	1454882	Rev	28.3867	e111	1454882	0			HVO_1584	193	GEN							6.16		-28	TCGACGGACGCGACGGCCATCGGCGGCCCGGCCCGAGGCGTTTTTGTCGGCCGGTGTGCTAGGGGTAGACA
CHR	1456037	Rev	5.13	e--1								aTSS	HVO_1585	1585n1							AGAAGCGGTCCGGGTTCGGGTAGTCTGGCGCGCCCTCGTACATGAAGATGGTGCCGGCGAAGGTGTGGTTA
CHR	1456071	Fwd	49.7167	e110								iTSS	HVO_1585	1585n2							CATCGGCTGGATGATGGGCCCGTGGACGCTCATCGGTAACCACACCTTCGCCGGCACCATCTTCATGTACG
CHR	1461629	Rev	22.3167	e1-1								iTSS	HVO_1590	1590n1					4.42	-31	TCATCGAGAAGAACACGACGATTCCGACCGAGGAGTCGAAGATATTCACCACCGCGGCCGACAACCAGACG
CHR	1461893	Rev	15.6833	e1-1								iTSS	HVO_1590	1590n2				10.57		-28	CGCTCGAAGACGCCGGCTACGACAAAGGCGACATCGACGACGTCATCCTCGTCGGCGGCTCCACCCGGATG
CHR	1463868	Rev	40.06	e111	1463868	0			HVO_1591	264	CHY								2.44	-30	CGTCGCCGGGAGCGGTCTCGCCTCCCCGACCCGGCGAGGACTTTTGTTCTCACCTCGCTATCACTACGCCA
CHR	1464657	Rev	31.2033	e111	1464657	0			HVO_1592	231	CHP								3.61	-28	CCGCCCTGAGAAGCGTTTCGGCCGACCCGCAGTCTACACGTTTAAGCCGCGTCGGACACTTCTCCCGCCCA
CHR	1465530	Rev	67.0667	e111	1465530	0			HVO_1593	248	GEN										GCGAGGCCGGCAGGCGATGACCGCACAGTCGCCCGTCGGATTTACCTCGCCCCGGCGACCATGTTCACGTA
CHR	1466471	Fwd	25.3133	e-1-								iTSS	HVO_1594	1594n							CCGTCGTCTACTCCACCTGCACCTTCGCGCCCGATGAGAACGAGGCCATCCTCGACTTCGTCCTCGAACGT
CHR	1468841	Fwd	37.6167	e111	1468841	0			HVO_1597	130	CHY							4.85		-27	CGACGGTGAGTGAGACGCGACCGACGACGCGGACGGCAAGGTTCATTGCGTCCGCGGCGGACGCCACCGTA
CHR	1469531	Fwd	19.5067	e--1								aTSS	HVO_1598	1598n					4.52	-29	GTAGGTCCCGTCGCGGAAGCGGTCGAGGATTTCGCGGCGCTCTTTCGTCCCGGTCTCGTTGGTTATCGGCG
CHR	1470628	Rev	64.56	e111	1470627	1			HVO_1598	459	RRR								2.31	-28	CCGCCCGGCTCGGCCCGCGTGTCCACCGCGGGACCGTCGATTTATCACCGCGCCCCGCCAACGCGCCGGTA
CHR	1470961	Rev	49.4767	e1-1								iTSS	HVO_1600	1600n							CGGGTACGACTCACCAACACCCAGCATGTACATCGTCATCTCCACGGACGCGGAGATTAAACTCAAAGGGA
CHR	1471443	Fwd	14	e--1								aTSS	HVO_1601	1601n							AGACATCATAAACTGGGCTACCGAACCGGGGGCGAAAAACTTACTCCCCGATGAGCCCGCGAATCCGCTCG
CHR	1473772	Rev	12.7733	e--1								iTSS	HVO_1603	1603n1							TCCCGGCGATGATTGTCATGGACAAGGGCATCCCCGCGAAGATAACCGCGGCGAACATCAAAAACGCGATG
CHR	1473808	Fwd	5.93	e11-								aTSS	HVO_1603	1603n2							ACAGCGCGGCGAACTCGTCGGTGGCGAGAATCTGCATCGCGTTTTTGATGTTCGCCGCGGTTATCTTCGCG
CHR	1474137	Rev	14.8533	e1-1	1474137	0			HVO_1603	348	TP										ATGCGTCATCTACCGCGTCTATCGTTACCGGGTACGCGCCCCGAATAAGGCGCTGATTCGTAACGAGGGCA
CHR	1475611	Fwd	49.8667	e11-			1475645	34	HVO_1605	520	TP								4.07	-27	ATTCGTCGACCGAACTACGACAACTCACGGCATCCGATGCGTCTTATTCTCAGGTCTCGAAGTGAAAACCC
CHR	1476409	Rev	14.2367	e1-1								aTSS	HVO_1605	1605n							GGCCGAAGCCGGTAACGGCGACGAGCGTGACGATGGGTGCGGCGAAGTACCACCAGCGCGAATCGACGTAG
CHR	1478336	Fwd	1.80667	e1--								aTSS	HVO_1608	1608n1					3.24	-27	CGTTTCGCTCGCGCGTCGACCGCGTGGAGGTAGCCGTCACCGATGTCCGAGTGGACCGCGTACGCGAGGTC
CHR	1478951	Rev	134.207	e111								iTSS	HVO_1608	1608n2				6.46		-28	CGTCGAGGTGGGGAGTTTCGACCCCGTCGAGGAGGTCGACTTCATCGAGGAGGAACTCGAACAGTGGCTCG
CHR	1479374	Rev	20.68	e101	1479374	0			HVO_1608	391	GEN							6.49		-28	CGCCGCTCCGTCGTCGCTCGCGCTTCCGCACACGCGAGCGTTTTTCCGCGTCCGCGACCATCGTCGACCCA
CHR	1480384	Fwd	49.1867	e001								intergenic		1609n					2.75	-29	TCAGTCGGTTGTCCATAGACGACACTCTCGACGCGGAGGATTAATCGTTGGGTAAGCACAAACGGCGACTG
CHR	1481303	Rev	91.7233	e011	1481303	0			HVO_1610	283	GEN								4.65	-28	CCGACTGCCCCGTCGTGTCTGACGGTTGTCTTGCGGACGGTTTATTACGGCACGGGTGTTGGTTCGGAGCG
CHR	1481392	Rev	9.54667	e--1			1481303	89	HVO_1610	283	GEN										CACGTCTACGCCGTCGTCGTCGAAAGAGAGAATCGTCATACCTCTCGTTGTTTCCCGCGAGTAGTTAAATA
CHR	1483014	Rev	12.5567	e--1	1483013	1			HVO_1613	228	MIS							6.88		-28	GGCGCTCGCGTCCCTCTCCTCGGTTTTGGTAAACCTAAAAGTTCAAGAGCGGCCGTCAATAACCCCGTCCA
CHR	1483076	Fwd	20.85	e111								intergenic		1613n							TCGGTCATTGGACGGGGTTATTGACGGCCGCTCTTGAACTTTTAGGTTTACCAAAACCGAGGAGAGGGACG
CHR	1483878	Fwd	10.88	e111								aTSS	HVO_1615	1615n1							TGAGGTCGACGTGCGGCACGTCGATGGAGACGTCGAACGAGGTTTCGAGGAAGGGCACGTCGAAGCGCGCG
CHR	1484129	Rev	5.68667	e--1								iTSS	HVO_1615	1615n2				8.93		-28	CTCGCTCGTCGGCGCGAAGACGGGCGACCGAATCGAGACGTTCATCGCCGACGCCGCCGCCCACCTCGACG
CHR	1484252	Rev	35.8767	e011								iTSS	HVO_1615	1615n3				7.71		-28	TGCCGACGCCCCCCTGTCGGACATGCGAATCGAGAACAGCTTCATCCCCGTCCGCGGCGTGGGCGAGCGGA
CHR	1484300	Rev	25.49	e-11	1484300	0			HVO_1615	251	GEN								3.49	-28	GAGCACGCCGGGAGTGCGGCCGCCGGCCCACGACGACGCATTTAGGGTTGCCGACGCCCCCCTGTCGGACA
CHR	1484423	Fwd	19.3733	e111	1484423	0			HVO_1616	234	GEN								3.04	-28	CGCACTCCCGGCGTGCTCCCGCACTTCCCCCGCCGCGGGCGTTTTACCCGCAGAGCGCGAAGCCGGAGATA
CHR	1486496	Fwd	371.87	e001	1486496	0			HVO_1619	148	CHY								3.56	-28	GCTCAGGATAACTTCTCTTATTCTGGACTGTGCCGGTAGATTGAATATCGGCCCCCGTGTCGGACCGTCCA
CHR	1488474	Rev	18.7533	e01-			1488436	38	HVO_1621	127	MIS										ACAACGAACGTCTGTGTGGATTAGTACATGCTAGCGACACGGCGATGGCCGCTCGCGGAGTAGTACGACTG
CHR	1489779	Rev	4.66667	e1-1								aTSS	HVO_1624	1624n							TGACCGCGTCGTCGGCGTCGACGACGTGGGAACCGCAGGCCATTCGGGTCGACCCGCCGGAGACCGAGACA
CHR	1491154	Rev	77.96	e010	1491153	1			HVO_1623	298	CHY										ACCGAGCGCGCTCCCGAGAGACGTTTTCCCGAAGCGCAACCTGTTTAGCGGGCCGCCCCGACGTTCCGATG
CHR	1491492	Rev	2.75333	e--1								iTSS	HVO_1625	1625n							CGAAGGGGCCGAATCCAGCGCCGCCGAAGCGACAGAGCAGGCTTCGACGCTCCACGACGAAGTCGGGGACA
CHR	1493193	Rev	83.4367	e111	1493193	0			HVO_1625	654	CHY								1.4	-28	TCGGGAGACGACGGCGAGGCGACTTCGCGGCCCCGGTTGTTTTATAATGGATGTCGGGAAAGTGGCGGCCA
CHR	1493886	Rev	6.66	e--1								iTSS	HVO_1626	1626n					2.31	-27	CCTCGCCACGCACGAGCACACGGACCACGTTCACGGGCAGAGTCAAGCGCCCATCCTCGAAAACACGGGCG
CHR	1494180	Rev	26.91	e101	1494180	0			HVO_1626	277	GEN								1.66	-28	TGTCGGGTCGTCGGGACGCGTCGGACGAGAGAGCGCAACGCTTAGTCCCCCGGCGGGAGGACACGTCTCTA
CHR	1494594	Fwd	26.46	e111			1494668	74	HVO_1628	149	GEN							5.4		-28	GAACGGCAGTCCGGCTTCGGTCGGGCGATGCGGCCCCGCACTTATCATCTTCGACGCGGTCCGATACCACA
CHR	1495027	Rev	6.15	e--1								aTSS	HVO_1628	1628n				5.1		-28	ACGCGACGGCCGCTTCCGGCGAGTCGCACGGCTCGAAGCCCTCTAGCGAGCCGACCTGTTGGGTTCTGATG
CHR	1497555	Fwd	11.28	e111								aTSS	HVO_1631	1631n							AGGGCGTCGAGGGGTTCGTCGCCGACGGCGATGCGGTACTCTTGGGGCGTCAGCATCGGCTTGTGGAACCG
CHR	1498489	Rev	52.5667	e111	1498488	1			HVO_1631	344	MIS								2.84	-28	CGTGTGGGTGTGTGACGCTCGCTCGTGGGGAAGCGCGGTGGTTAAACGGCTCCGTCCGCAACGATGGGGCA
CHR	1498654	Fwd	7.74667	e111	1498654	0			HVO_1632	217	GEN										CGCGACGGTGTCACCCGGTTACCCGCCCGTCACTCGGGGATTCAAGGCTCGCGGCGGCCTACCGGTGTCCA
CHR	1499389	Fwd	195.697	e110	1499389	0			HVO_1633	124	GEN								3.7	-28	GCTCGAAACGCTCGCGCCGTCGCCTTCCCCGTTCGGCAGGTTGAAACCGCTCGCACCCCAACGCGCGGCTA
CHR	1500481	Fwd	130.06	e110	1500481	0			HVO_1635	207	CHY								3.45	-26	CCGCGTACCGTCGGATAGCCGACAAGATACCGGGGAAGAAGTAATATGAGCGACCCCCTTACACACGGTTA
CHR	1501439	Rev	25.8333	e100	1501435	4			HVO_1636	88	CHY							7.41		-28	AGCGACTCCGCCGCCCTCGCCGCCCCGGCGAATCGGCGGCTTCTTGATACTCGCCTTCCGACCGCCTCGTA
CHR	1502397	Fwd	19.65	e110								aTSS	HVO_1637	1637n					3.89	-28	TCGTTCGCACCGTGTACGCGAGGCGGACGAAGTCGCCGTCCTGAATACCGGACTCGACCTCTTCATCGACC
CHR	1502429	Rev	336.067	e001	1502429	0			HVO_1637	306	MIS								2.35	-28	GTTGGCCGCCTCGAACGCGTCGCGACGGCGAAACGTGATTCTTAAGGGTCGCACGAGTCACGTAGCGTGTA
CHR	1502519	Rev	50.29	e111			1502429	90	HVO_1637	306	MIS							7.24		-28	GCCATGTGAACACGCCTCGTTTTCTATAACTATCGACAATGATATAAGCGATTCGACCCCATAGCGGCCCT
CHR	1505945	Rev	8.99667	e--1	1505945	0			HVO_1642	133	CHY							5.2		-28	GCCAACCCGGACGACCGGTCTCCGGTCGCGTGGAGAAGATTCATTGCGTCGTCGTCCGTGACCGCAATCTG
CHR	1506607	Rev	32.2967	e0-1								iTSS	HVO_1644	1644n1				5.55		-28	TTCTACATCCTGTGAGGTGACAAAGATGGTATCAACGAAACTCTATACGGCGATTTACGTAGTGTTGTTCG
CHR	1506621	Rev	11.0033	e--1								iTSS	HVO_1644	1644n2							TCCTGTTCCCGCTGTTCTACATCCTGTGAGGTGACAAAGATGGTATCAACGAAACTCTATACGGCGATTTA
CHR	1507838	Rev	79.7633	e111								iTSS	HVO_1645	1645n1				6.89		-28	GTTCCTCGGCAAACTCCACTTCGCCGTCTACTTCGTCGGCTTCAATCTGCTGTACTTCCCGCTTTTCGTCG
CHR	1508357	Rev	6.49333	e--1								iTSS	HVO_1645	1645n2					1.99	-28	CCACCTGTTTTGGTTCTTCGGCCACCCCGAGGTGTACATCGTCTTCTTCCCGGCGCTCGGCGTCATGGCCG
CHR	1509415	Fwd	17.7967	e--1								aTSS	HVO_1646	1646n1							TACTCGTCGGGCAGCATCACGACGACCTCGGCGGACATATACGAGTGGCCGGCCCCGCAGAGTTCGTAACA
CHR	1509843	Rev	14.8133	e1-1								iTSS	HVO_1646	1646n2				7.22		-28	TTCCTGCTCTTGGGGACGCTCGTGGGCGTCGTCGTCGTGGGGTATATGCTCTACAACGCGTACAAGTATCG
CHR	1510006	Rev	93.3467	e111								iTSS	HVO_1646	1646n3							TCCCCGATTGCTCCGAAACAATAACCATCACGAACGTTAATTATTTTGTTTGGTGGTGTTATCAATGGTCG
CHR	1510645	Rev	23.0767	e110								iTSS	HVO_1647	1647n							GGCTACTGCGGTCGAACAGCGCGCCGGCGAGACCGCCGACTACGACATCACGGGGAACGTCATCCTCACTG
CHR	1510752	Rev	18.8167	e110			1510738	14	HVO_1647	171	CHY							5.64		-28	CCTCGGTGACTCGCGCCGGCGACCCCTCGACACTACGGCATTTATTACCTTTTATCATGAATGACTCCGTA
CHR	1510853	Fwd	8.77333	e11-	1510853	0			HVO_1648	185	MIS										TGCCGTAGTGTCGAGGGGTCGCCGGCGCGAGTCACCGAGGTTTTTGCCCTCCGGACGCGCCCGTGAGACCA
CHR	1511180	Fwd	21.65	e111								iTSS	HVO_1648	1648n					3.29	-28	GGAGTACGAGACCGGCGTCGAAGACGGTGAAACGATGAACGCTATCTGCGAGGCGGTCGGCTTCGAACCCG
CHR	1515166	Rev	92.49	e111								iTSS	HVO_1650	1650n							CCAGTCCCGCGTCCTCAACGAAGCGCTCGACGACCGGAACCCGCTTCTCGAACGGGTCCGATTTCTGTCCA
CHR	1515516	Fwd	54.1933	e111			1515581	65	HVO_1651	391	RMT							7.51		-28	CGTCTGTCTACGGTTCAGTAAATTGTACTATTTACAAATATATAACACTAATAGCAGCGGAGAGCGACGTG
CHR	1516953	Fwd	15.5967	e011	1516953	0			HVO_1652	84	CHY							9.08		-28	GTTTAGATTCGTTTCGAATGAACAATTGCACAAAAATGACTTTATTTACCGTGAGCGCTAGGGATCTCTCA
CHR	1517132	Rev	7.43	e1-1								aTSS	HVO_1652	1652n							CGGTCGACTCCCACTCGGCGGCGCAGGACTCGTCGCAGAACACGACGCGCTCGCGTTCGAGCGTTATCTTG
CHR	1518788	Fwd	12.83	e--1	1518788	0			HVO_1655	126	EM								2.78	-28	GCGACGAGCGCGGGCGGCGAGCCCCGCCGCGAGCGCACCCGTTAAATCCGCGCGGCCGGTAGACGGGCGCA
CHR	1521316	Rev	6.06333	e111	1521316	0			HVO_1656	703	GEN								3.13	-28	GCCACACCCCGAGTCGGCCACGACGGCCGTCTCCACGCCGCTTTAGTTCCCGGAGCGCCGACTCCGACGCA
CHR	1522223	Fwd	4.56333	e--1								iTSS	HVO_1657	1657n							GGGCGACGAGGGACCGAACACCGGCGGCATGGGCAGTTACACCGACGTGTCTCCCTCCCTACCGTTCATGG
CHR	1525236	Rev	98.72	e001	1525235	1			HVO_1660	269	GEN							5.85		-28	CGGCCGAATCGCGCACGCCACGCGTCAGACGCGACACAACCCTTTTTCTCACCCGGTGTCTCTCTCCACCA
CHR	1525631	Fwd	61.87	e011								aTSS	HVO_1661	1661n				9.69		-28	GCTTGACCTGATGGGCGCGCTGTTCGACCATGTCGATGTCGTCAAAGTAGTGGGCGACCGAATCGTCCGCG
CHR	1525770	Fwd	103.25	e-1-			1525931	161	HVO_1662	62	CHY										TGACTGCGCAGGCATTCGTCGGGGAGTTGGACACCACGAGGGTAAGGTTTCCTCCGAACGTATGCGGGGTG
CHR	1525890	Fwd	92.6567	e001			1525931	41	HVO_1662	62	CHY								3.97	-28	TTCTGTTTGAATTCTCCGGAGATGGGTCTGAGTCCGTAGAATCAAGATACTACGTCGAGTTCCGGGATACG
CHR	1526090	Fwd	215.647	e010								iTSS	HVO_1662	1662n					4.11	-28	CTTTCGCCTCTCTGACTATTTCCGACTCGAACTCGTCGTTTACATGGCAATCGGGTGGATATTCCTCGTTG
CHR	1526374	Rev	292.533	e-01											HVO_1663	1526350	24	6.96		-28	GGCCGCGGGAGCATAATCCCCGCGGCGGGCGCTCGTGACGTTTATATATCGTTGCGGGAAATGTGCGGTCG
CHR	1526457	Fwd	37.2	e111	1526457	0			HVO_1664	102	GEN										CCCGCAACGATATATAAACGTCACGAGCGCCCGCCGCGGGGATTATGCTCCCGCGGCCGCAACGACGACCA
CHR	1526979	Rev	51.45	e101	1526979	0			HVO_1665	55	CHY								4.54	-28	ACCGCGAGGGCCGCGGTCGGACGCCCCCGAGCGACGAATAGTTTTCACTGTCACGGTCGTACGCTCCCCCA
CHR	1527509	Rev	178.867	e111	1527509	0			HVO_1666	166	COM								3.02	-28	GATGGCCGCGGGCGTTGGGCCGTTAGGCTAACCCGACCCGCTTAAGTCGCGCCGTACCCACCCCGAGAGTA
CHR	1528100	Rev	163.02	e-01			1528091	9	HVO_1667	154	REG							7.81		-28	ACGCTGGACTGACTCGCACGCCGACGCGCGACAGGAAACATTTTTTAGCGCCCCAGTTTTGACCTTTGCCG
CHR	1528139	Fwd	12.88	e1-1								intergenic		1667n							TCTGTGCTCTGGTCCGCAGACATTTGTGCTACGGCAAAGGTCAAAACTGGGGCGCTAAAAAATGTTTCCTG
CHR	1529236	Rev	64.4133	e-01	1529235	1			HVO_1668	358	MIS							5.55		-28	CGGCGGCGGTCGTGCGACGCGTTCGCCGGCTCCCACGGTGTTTTTAATTCGGCGCAACTTACGCCGTTGCG
CHR	1530902	Rev	4.63	e--1	1530902	0			HVO_1670	280	RMT								2.64	-29	GAACGACCGGACGGCGGCCCGCGCTCGCGGGTCCGTGCCCTTTTACCCGAACGGGGCGCAATCCGCCAGTA
CHR	1532080	Fwd	114.537	e101	1532081	1			HVO_1673	216	CHY								2.25	-28	CCGCGCACCGCGCCGAAGACCGACCCGTCCGGCCACCGAACTTATGCCGGGTGCGGGGAAATGGCGGGGCA
CHR	1532481	Fwd	13.1867	e110								iTSS	HVO_1673	1673n							GGCCAGCCGCGGAGCCCCATCGGCGACTACTCGAACGACGACCTCATCCGCCTCGTCGACAACCGGTATCA
CHR	1534070	Fwd	1648.07	e110			1534149	79	HVO_1676	332	TC							11.24		-27	GCCCACATCGTGCGATTCACCCACACAGGGGCGGCAAAAACTTTATAACTCTTTCGAACTTACTGTTGGTA
CHR	1534447	Rev	4.23667	e1-1								aTSS	HVO_1676	1676n				5.26		-28	CTGCTCGCGCTGCCGCGGCGAGAGGGACTTGCCGTAGGCGTCTTTGTTCTGCCAGCCGATGTTGGTCGACA
CHR	1535246	Fwd	844.257	e111	1535246	0			HVO_1677	59	GEN							9.23		-29	AGCCGTGCTTTTTCTCGGCCGTGCTATCACGCAACAACATTTATCCGCGCTCCCGGAGCATATACCGGGTA
CHR	1535407	Fwd	80.3	e111								iTSS	HVO_1677	1677n							ACTCGTGTCAGAGCTGTGGCGCGACGCGGCGCACGGCCGAGTTCATGCGGACGGAGCGCGACCTCCAGACG
CHR	1535889	Rev	7.71	e1-0	1535889	0			HVO_1678	135	TL							5.24		-28	GCGCCGAGCGTCGGTCGCGCGCGTCGGGGGGTCGTGAGAATTTTACGCCCCCGCGCGCGTACTGCCGCGCA
CHR	1535966	Rev	10.4633	e--1			1535889	77	HVO_1678	135	TL										TTGGTTTGTTGTTTCGCCCCGTCGCTAGTGAACGACGGCCGAATATCACGAGTGGTTTATATAGCTATGTA
CHR	1536022	Rev	10.8233	e01-			1535889	133	HVO_1678	135	TL										CTTAAACCGCCGATTATGGGGGTCTCAGCGGAAATTTCGTGTTCGACCGTTTTCAATTGGTTTGTTGTTTC
CHR	1536067	Fwd	25.8367	e0-1			1536158	91	HVO_1679	78	GEN										GGCCGTCGTTCACTAGCGACGGGGCGAAACAACAAACCAATTGAAAACGGTCGAACACGAAATTTCCGCTG
CHR	1536154	Fwd	22935.7	e011	1536158	4			HVO_1679	78	GEN							6.87		-28	CGGTTTAAGGGGGTCGGATGCTAACGTGTCTCAAGATAATACTATATCCCTCCGGTCTCAAGCCGTGGTTG
CHR	1536889	Rev	30.6167	e10-								iTSS	HVO_1680	1680n							CGACGTGGAGACCGTCGACGAGGCGATTCGTATCGCCATCTCGAAGACCGGCGAGATGCTCAATCCCGACC
CHR	1537004	Rev	527.483	e111	1537000	4			HVO_1680	146	GEN							5.56		-28	AGGCGGGGAGTGAGCGCAACGAGACGGACTGGCAAGAAGGTTGATAGCCTTCGGCACACAACCTCCTCGTA
CHR	1537067	Fwd	8.84333	e1-1								aTSS	HVO_1681	1681n					2.52	-28	CCATGGGTACGAGGAGGTTGTGTGCCGAAGGCTATCAACCTTCTTGCCAGTCCGTCTCGTTGCGCTCACTC
CHR	1537977	Rev	32.18	e-11	1537976	1			HVO_1681	304	RRR								1.83	-27	CGCCTCGTCGCCACCCCGCCTCGCCCGCCGGCATCGAAACCCGCAAATCCCCCGCGCCCAACGTCGAAGCG
CHR	1540387	Rev	6.43	e--1	1540387	0			HVO_1683	496	CHM								4.43	-29	TCGCGCCCTCGTCGTCGGCTCGCCGTTTCGACCCAAAGTACCAATTGGGTCGCCCGCGGACCCTGTGGGTA
CHR	1540595	Fwd	43.22	e111	1540595	0			HVO_1684	643	TL							6.56		-28	CGGCCGCGAGCGGGCGTCGAACGCGCCCGTCTCAACAACACTTATTCTCCCCCGTCCGTTCCGTGCGCGTA
CHR	1540845	Fwd	4.51	e--1								iTSS	HVO_1684	1684n							ATCGTCACCGACCAGTCCGACGAGTATCTGGACGTACTCCGCCACTCGGCGGCCCACGTCTTCGCGCAGGC
CHR	1543999	Rev	11.8833	e-11	1543999	0			HVO_1685	485	CHY								2.08	-28	TCTCCCCGCCCGTTCCCATTCCCCGACAGGCGGGCCTAGGGTCATTATCGTGTCACTCGTATCACACGGTA
CHR	1544584	Rev	2.98	e1-1								iTSS	HVO_1686	1686n1					3.45	-29	CGGCGGCATCGCCGTCGCCGCGACCGTCGTCGCCGAGAAGTTTACCAACATGCTCTGCCAGCCCTACACCG
CHR	1545001	Rev	12.5433	e111								iTSS	HVO_1686	1686n2							CGCGCGGGCCGCACAGGGCGTCGCCGTCACCGGCGCGGGGCTGATGTCGCTCGCGCTCGTCGGCGAACTCG
CHR	1545551	Fwd	4.42	e--1	1545551	0			HVO_1687	83	CHY							7.43		-28	CGCGGACGGCCTAAAGCCCCCGCGAATAACGGCGGTGAGCTTTATCACTCACGACGAGAGATATGTTAGCA
CHR	1546227	Rev	2004.77	e111											HVO_1689	1546223	4	7.11		-28	TGCGTGTGCGTCCCTGCCGTCGTCGTGCAGAAAGGAAAGTCATTTTACCCACCGGCAGTTACGAGAGATTG
CHR	1546352	Fwd	174.703	e001	1546356	4			HVO_1690	485	GEN										CAGGGACGCACACGCAAGAAACAACGAACAAACGGTGGGTGTTAAGTGGCGGCCGACCGGAGTAGCGGGCA
CHR	1548111	Rev	1105.64	e110	1548111	0			HVO_1691	97	GEN								2.45	-28	TCTGCCGCGCGTCTGCGCCCCGACTCGCGGGCTACGAACAATTAAGACCCGGCATCCCATGTTGGCGGATA
CHR	1549291	Rev	6.51333	e1--								iTSS	HVO_1692	1692n1							TGCACCACCGCCTGTCCGGTCGAAATCGATATCCCGTGGATTAACACGGTCGTCCGCGACCGGGTCAACCG
CHR	1549909	Fwd	9.84333	e--1								aTSS	HVO_1692	1692n2							CTCGGAGGTGACGAGCGCCATCGTGCCGGTGTCGGCGGTGATGAAGTTCGCGCCGGTCATCCCCACGTCCG
CHR	1550991	Rev	56.1267	e1-1	1550991	0			HVO_1693	167	GEN							4.88		-28	CTTCATAATTAACCGACAGCGTGGTGCTCGAACCCGAAGAACGATTATGTAGAACGCGCTAGCTCAACGTA
CHR	1551020	Fwd	16.7667	e01-								intergenic		1693n							TTCGAGCGAGTCCTCGAACGTTGCAACCGTGCCGGTTGACATACGTTGAGCTAGCGCGTTCTACATAATCG
CHR	1551499	Rev	9.5	e-11								iTSS	HVO_1694	1694n					2.82	-28	AGTCCTACGGCCGCGAGGCCGGCTGGGACCTCCCGAAACTGTTCTGGCGGCTCCTCACCGCTTTCTGCGTC
CHR	1553684	Rev	16.4433	e111	1553684	0			HVO_1695	215	GEN							5.16		-28	ACAACACACGAATGAACTGGTGATTCACTCGTGTGTAAAGGCTTATGCAGTCGTATGAAAAGGAATTCTCA
CHR	1554270	Fwd	13.6633	e--1								iTSS	HVO_1696	1696n1				5.5		-28	CATGACGCCGCAGTGGATTATCGCCTCGACCATCAACGGCTTCATCACCGCCTCGAACATCCTGTACATCG
CHR	1555517	Rev	13.7867	e0-1								aTSS	HVO_1696	1696n2							CGACCGCCTGCGCGCCCAGCATGACGGTCTTCGGCGTGCCGATTTGGTCAGCGACGCCGTACTGGAAGGTG
CHR	1555982	Fwd	3.95	e--1			1555993	11	HVO_1697	1026	GEN								2.78	-28	ACCCGCGCGCGACCCGGAGCGACGCCCGTCACCGGGTGTCTTTATCCGTTCACGCAAACCGACATACGACA
CHR	1556569	Fwd	5.48333	e--1								iTSS	HVO_1697	1697n1							CTCCACCGGCTCGCACTCGCTGAAGTACGGCAAGACCGACTACTACATCGAGGAGCTCGAAGTCGTCCTCG
CHR	1559135	Rev	8.87667	e--1								intergenic		1697n2							TCCCTCGCATCTCGGTCGTTCCGCGGTTGGCCGCCGAGCGTCCTAAACGTATCTGCGGCGAAAAACGAGGG
CHR	1559189	Fwd	39.9033	e001			1559213	24	HVO_1698	265	GEN								1.97	-28	CGCGGGTCGCAGTCTTCCCTCGTTTTTCGCCGCAGATACGTTTAGGACGCTCGGCGGCCAACCGCGGAACG
CHR	1561159	Rev	10.31	e--1	1561158	1			HVO_1699	378	GEN								2.05	-27	ACGACCCGCCGCCGGCAGCCGATGTTCCCGAGACCCCAACGACTTACGGGGGCGGCCGCGAAGGGGTCCCA
CHR	1562020	Rev	15.59	e-11								iTSS	HVO_1700	1700n					2.14	-29	ATTCGTTTGTTTATATGCTGATGGCGGGTTCTCCTGTGACTTAAGTAGTGACACGTTCATGCAGTTCGACA
CHR	1562123	Fwd	64.92	e001											HVO_1700s	1562171	48	10.52		-28	CACAGGAGAACCCGCCATCAGCATATAAACAAACGAATTGTTTTTATACTCGAAATCACTCACTGAGTGAG
CHR	1562170	Fwd	733.3	e111											HVO_1700s	1562171	1				ACTCGAAATCACTCACTGAGTGAGTGATGCGATGGGTGAAGTAAAGCGTGTAGCCGGAGTATGGAGGTACG
CHR	1563230	Rev	12.6533	e111	1563230	0			HVO_1702	143	CHY								4.43	-27	GCAGGCCGTAACTGATAGCACACGGCACGCCCGCCGCGCCGTTTTTGTTCTTCGCGTCCCGACGGAAGCTA
CHR	1567095	Fwd	31.7633	e111	1567095	0			HVO_1705	388	TP										GGCCCGCGATTCGGCCACTTCGCCCGCGAATCGGTAGGTATAAATGGTTTAGGGAGACCTAAATTCACGTA
CHR	1568265	Fwd	32.06	e001			1568274	9	HVO_1706	531	TP								3.03	-28	CGACCTGACGCAGCTTTCGGACCTCGAAGGAACCGTGGAACTCTTGCGTGAGGTGGGCGTTCTCTGAGGTA
CHR	1577087	Rev	22.47	e11-								iTSS	HVO_1710	1710n							CACGTTGATTGTGAGTATGCAACACCCAGGACCGCCGCAGTTCATGGCTGTCGGCGAGTCAGTACAACTCG
CHR	1577141	Rev	20.1133	e111	1577141	0			HVO_1710	677	CHM								4.66	-27	CCCGTCTCTCACCGGAACGCCGGTCCCATCAGGGGTAAACTCAAAGTCACCCGGCACGTTGATTGTGAGTA
CHR	1577316	Fwd	159.777	e111	1577316	0			HVO_1711	1511	CHM								1.9	-29	TCGGTTCACAGGCATAACTGATGGCAAACGGGCGGCCAATACTTATGGTTCGGGACCCTCGTCTACCTCTA
CHR	1581981	Fwd	14.21	e111	1581981	0			HVO_1712	161	GEN								2.85	-28	GGCGCTTCGACGACTTCTTTCGACCCGTTCCGCCAGCACCGCTTTTCCGTCTCCGGCCTAACGGTCGGGTA
CHR	1583358	Fwd	20.1533	e--1								aTSS	HVO_1713	1713n							CGCTGGCGGGCCAGCGTGTGCGTGACGTTGTTGCCGACAGAGCGAAGGAGGTCGACTTCGGTGTCAGTCCA
CHR	1586825	Rev	11.1467	e11-								iTSS	HVO_1716	1716n				5.18		-28	CTCGGGCTACCCCGACTGCCGGCCCGAGTTCTTCGACGCCTTCGAGGCCATGGTCGACGTCGGCACGAAAC
CHR	1588511	Fwd	6.44	e--1								aTSS	HVO_1718	1718n					2.69	-31	CCTCGTCGGTCAGATCGCCGACGACGCGGACCGAAATCTCGTAGTTGTGCCCGTGCGGGCGGCTACACTTG
CHR	1588657	Rev	19.37	e-11	1588657	0			HVO_1718	158	RMT							7.05		-28	AACGACACCGGTTATTCGACCGACAGAGCCGAGACAGGAGAATTAAATACTCTCGTGATAATCCTCGGATA
CHR	1589157	Rev	67.56	e001	1589156	1			HVO_1719	127	GEN								3.82	-28	CGGCTTATCGCACCGGCTTCACCGGAGGCAAACCGTCGGTGCTATACCCCTCGCCCGTGTCGCGCACCGCA
CHR	1590454	Rev	96.3633	e110											HVO_1722	1590452	2	6.28		-28	CACCCGTCGTCGGGCGCTTCGCCGCCCGGAATGAGAATTCTTAAGTCTGCCCGTGGATTGAGATTCTCTTG
CHR	1592806	Fwd	3.96	e1-1								intergenic		1723n					1.36	-27	CGAGGAGAAAGCGAGGAGCGAACGAGCTGAGTGCGAGAAGACAGAAGCGACTCGGCTTCGTCGAAGCGGTC
CHR	1593325	Rev	210.55	e100	1593325	0			HVO_1724	160	CHY										TTCTCCCCCGACGGACTGTGTCGTTCCCGTGGCGTCAATGCAATTACCCAGGGGGACGAATCGGTAACGTA
CHR	1593472	Rev	16.6467	e1-1			1593325	147	HVO_1724	160	CHY										ACCGGACCCGGCCGAGCCGTCACCTGCCGACACCGACGTCTACACCGGTCTCGGACCGAACTTAGCTCTCA
CHR	1594645	Rev	7.99333	e--1								intergenic		1724n							GTTAGGCATGTTCGCAACACACCACGTTTCCGGTGAAAGGACTTACCATTCGACTCAGCACACACACACCA
CHR	1594707	Fwd	49.6267	e011	1594707	0			HVO_1725	401	MIS								3.71	-29	CGGAAACGTGGTGTGTGTGTGCTGAGTCGAATGGTAAGTCCTTTCACCGGAAACGTGGTGTGTTGCGAACA
CHR	1594790	Fwd	97.69	e--1								iTSS	HVO_1725	1725n1							GCGACGACCTCTTCACCCGGGAGGACCCCATCTTCGCCAATAAGGAGTTGTTGGAGATTAACCACCTCCCG
CHR	1595048	Rev	23.82	e1--								aTSS	HVO_1725	1725n2				7.2		-28	GTTTGTAGTACGTCGACGTCGAAAGTCCCTTATCGGGGACTTTTATCCCGGTAATCGAGGTGTCGTTGACG
CHR	1595628	Rev	32.6133	e01-								aTSS	HVO_1725	1725n3							ACGCGGCTCGTTCGGAAGCCGTCTTGTTTTTCGTTCGAAAGCGAGAGGATGGCGAGCGCCTGCAACACGTA
CHR	1595985	Rev	39.17	e--1								intergenic		1725n4				5.67		-28	TCGGTCACGCGTGAATATTCCAGTCACACGATTATGCAATAAACTATAAGAGGCCACTCTACGGAGGTACG
CHR	1596448	Rev	34.2733	e111								iTSS	HVO_1726	1726n1							GCCGCGGACAACGACCCGCACGCGCCGCTTAACAGGTACTTGACTATCGTCGGAAGCGAACCAGTCGACCG
CHR	1596878	Fwd	46.8333	e011								intergenic		1726n2					2.23	-29	CGGAGAATCGCCTCTCGACTCTGTGACCCAACGAGAAACGCTACGTCCTCCCGCGCACTCATGTACCTCTG
CHR	1597273	Fwd	12.0667	e0-1								aTSS	HVO_1727	1727n1							CGATGTTCTGGACAGTTATCTCTGGCTCGTCGTCGACGGGAATCTTCAGCTCACGGAGCTTATCGAAGATA
CHR	1597385	Fwd	23.9967	e111								aTSS	HVO_1727	1727n2							CGTGCACACGATCTTCCCCGACCGGAAGATGAGCGCAGCGGCTTTCGGGTCCTGGGTGCGATAGACGAGGC
CHR	1597751	Fwd	18926.9	e110											HVO_1727s	1597770	19	7.34		-28	CTCGTGTCTATTTTTCTCACAGAGCCACTAAATCAACGGGGTTAAATGTATCCCGGGCATTCGGATTAATG
CHR	1597900	Fwd	270.353	e010								intergenic		1727n3					4.24	-28	GGATGACACACCTTCCCGGGGGTCGCCACGATACGACGGCCTTAAGTGGTCCAAGGCATTTCGGATGAATG
CHR	1598008	Fwd	30036.3	e11-											HVO_1727s2	1598017	9				TCCTGCCTCACCGGACCCGAACCGAACGAGGTTCGAAGGGTTTATACCCTCGAATCGCTTCGGTTCAGGTC
CHR	1598557	Rev	1.59333	e--1								aTSS	HVO_1728	1728n1				7.68		-28	TTATTCCTCGACCGCCTTACGGTCGAGAAAAGCGAGGACTATATGCCCTCGCACTTGGGGTCCCCTTATCG
CHR	1598892	Rev	5.22	e1-1								aTSS	HVO_1728	1728n2							CACCTAGCGAGCATCGTTTACAGCTAGGACTACCCGGGTATCTAATCCGGTTCGAGACCCTAGCTTTCGTC
CHR	1599018	Rev	97.48	e111								aTSS	HVO_1728	1728n3					2.14	-28	CGCAGGCTCCTCCGGTTGTAGTGCTCCCCCGCCAATTCCTTTAAGTTTCATCCTTGCGGACGTACTTCCCA
CHR	1600198	Rev	1.22	e1-1								aTSS	HVO_1730	1730n1							TTACTAACGACATCGCGGATTGCTTTCTTTTCCTGTTCCTACTAAGATGTTTCAATTCGGAACGTTCCCCA
CHR	1600322	Rev	1.69333	e--1								aTSS	HVO_1730	1730n2							GGTTTTCACCCTGTATCACGCTCCGTTCCAGGAGACTTCACATAAGACCCAGGTCCGTTATGGGTAGTCCG
CHR	1600506	Rev	1.84	e1-1								aTSS	HVO_1730	1730n3				6.75		-28	AACTGATTTCAAGCCCTATTGCACCGCCCTGTTCGGGGTGCTTTTCAGCGTTCGCTCACGCTACTTGTTCG
CHR	1600709	Rev	2.83667	e--1								aTSS	HVO_1730	1730n4							GACGGTGGCCCTGGTCAAAGACTGCGGCCGTATCGGTTTCCCTATGCCTCCGGGGGTTCACCCCTTAGACT
CHR	1600962	Rev	7.77333	e1-1								aTSS	HVO_1730	1730n5					3.23	-29	CTCGGAGTCCGGATTCCCAATCGGTCGCTCTACCTCACGAACTATCTCATCAGAGGTCATGCTTCGACATG
CHR	1601202	Rev	3.03667	e1-1								aTSS	HVO_1730	1730n6							TCGACGCCTCGAACCTCGGCCGGTAAGCTGTTACGCTATTCTTAGAGGGTAGCTGCTTCTAAGCTCACCTC
CHR	1601574	Rev	4.89333	e--1								aTSS	HVO_1730	1730n7							GTGCCGTTACGGCTTCCACGAATTTCGGTGATTCGACGGGGCGAAGGCCCCGCTCGGTGTTTCCTAAAGCG
CHR	1601805	Rev	4.64667	e--1								aTSS	HVO_1730	1730n8							CTAGACAGTCGGAGCGTCCGAGTCACTGCGACCTGCTCGGTCAAGAGCAGGCATCCCTTATCGCGAACTTA
CHR	1602495	Rev	2.2	e--1								aTSS	HVO_1730	1730n9					2.09	-28	AGCCACCGGGTCGATATGTGCTCTTGCCGGTGACGACTCTGTTATCCCTAAGGTAGCTTTTCTGTCATCTA
CHR	1602609	Rev	2.88667	e--1								aTSS	HVO_1730	1730n10				5.49		-28	GACCTGTCTCACGACGGTCTAAACCCAGCTCACGACCTCCTTTAATAGGCGAACAACCTCACCCTTGCCTG
CHR	1603381	Fwd	130.107	e110											HVO_1732	1603383	2	5.86		-28	GAGTCTCGAAAACGCCCGACTCAGGTCGCACACCGTCAGGCTTAAGCACAAGACCGGGATACCAGTAACTG
CHR	1603637	Fwd	918.3	e111	1603637	0			HVO_1733	191	GEN							10.38		-28	TTTGAAACAGAGTTCTTGGAATATTCCGCATACACAAAGATTTATTCCGCTAGACGACCGTATTTCAGGTA
CHR	1603818	Rev	21.8233	e111								aTSS	HVO_1733	1733n				5.67		-28	GGTGATCTGCGTGACGATACCCATGCGTTCGAACCACTCTAAATATTCACGGGCAGCGTCTACCCCATGTC
CHR	1604455	Fwd	55.06	e001								iTSS	HVO_1734	1734n					4.45	-31	GAGTGCTCGCCTTGAGATCGCGTGGCTCGAGAACGGGGACTTCTCGATACACTACCACGAAGAGCACCATG
CHR	1604777	Fwd	161.553	e111								aTSS	HVO_1734A	1734An				5.93		-27	GTTCGGCCCGTCGCCGAGATTCGACAAAACGAAACACAACGTTGTAATGTCGAGTCCACGTTGAGAGGGTG
CHR	1605157	Rev	25.41	e111	1605157	0			HVO_1734A	169	GEN								3.73	-28	TGATCTCCGTTATCCCCCTTGTTCTCTCGCTGCGAGGGTTTATTTCCGATACCGGCACCAAACGCAATAGA
CHR	1605365	Fwd	25.9467	e111								aTSS	HVO_1735	1735n1							ACGAACTCTTCCAACCGCGCTTCGGGGACCAACCCCTGCATCTCTTCTAAGTGGTCGGCGATATCTCGGTA
CHR	1606933	Fwd	13.2433	e--1								aTSS	HVO_1735	1735n2				5.29		-29	GGCTGTCGTCTGATCGACCAGCGATTCGATGTCGACCGTTTCATTTCGTTCGGGGTCAGTGTCACTCATCG
CHR	1607081	Rev	28.3967	e--1								iTSS	HVO_1735	1735n3				5.96		-28	GCGTGGTGCCAACTATTATCACCAAGATCGGATACAAGAACTGGATATCGACGGCAGCGAAATCAGAGCCA
CHR	1607336	Fwd	434.61	e111	1607341	5			HVO_1736	470	RRR								2.81	-28	GGTGCTTGGTCGTTATGTCTCTCGGCCAGCGCCCGACAGATTGAATCGTCCGACGGTCGTGCGTTCACGTA
CHR	1608818	Rev	15.97	e1-1								aTSS	HVO_1737	1737n1					3.75	-26	AGTTCTCCCTTCGGTTCACCGAGATGGTCCTCGAACAGCGCTATCAGCGTGGCCGCCGTCTCTCGGTACTG
CHR	1609126	Rev	11.12	e--1								aTSS	HVO_1737	1737n2							CGAACCGGACGAGCCGTTTGTTGTCCTCCAGATCAGCGTACATACCCCGGTAACACTCCTCGAGTGAGATG
CHR	1609386	Rev	22.7133	e11-								aTSS	HVO_1737	1737n3				6.2		-28	CTCGTCGATGGGGTAGATCCGGTGCATCAATCCGAACAGCTTCATGTAACTGAACACCGTTCCGAAGTGCT
CHR	1610456	Rev	22.0833	e--1								iTSS	HVO_1738	1738n							TCGACGGCGACGTGATCACGTCGACCGACACGGCCGCAATCGTCAAGCAGAAACGACCATGACACGGGAGA
CHR	1610530	Rev	10.9567	e111								iTSS	HVO_1739	1739n				7.63		-28	CGACTTCGGGACGCCCTCGCATTACTACTGCATCGTCAAGGATGTCTACGAACCAGACGAAATCGACGAGG
CHR	1611877	Rev	38.84	e--1	1611874	3			HVO_1740	210	CHY										ATATGGATCTGTAATCCCACTGTACGTCCGGCGCCACAAGATACTGGTACCGCCCAGATGATACACTCTCG
CHR	1612215	Rev	64.6233	e111								iTSS	HVO_1741	1741n1					4.7	-28	CTCGGTCGAAGAGCAACTCCAGGATGCTGTTACCGAGGAACTATTCTGGGTTCGGGGCGTGCTCCCGCATG
CHR	1612373	Fwd	82.16	e111								aTSS	HVO_1741	1741n2					4.31	-29	TCCCCATCCGTACGTGAACGATTCTTCCCAACTCGTGTCTTTATTTGAATCCCAGAACGAACCGAGATACG
CHR	1612927	Rev	88.0667	e001			1612920	7	HVO_1741	328	CHY								2.97	-28	AATATCTGCGCGTTCGAGACAGCCAGAACAGCCCCGAACGTAGATGTGTCTCCCCCTCGTCCAGACGAATA
CHR	1614432	Rev	65.43	e011	1614432	0			HVO_1743	265	GEN							5.6		-28	CCGATCCGAGCCGGCAGGCCGCCGATTCGACACCGTAATCGAATTTTACGTCTGCGTCGAAAGACGAGTCA
CHR	1614631	Rev	28.88	e010								iTSS	HVO_1744	1744n1							TACGACAGTTACCGCGGTGGTGTCGGACTCGCCCGCAACGGATACGACCACATCGAGGGACTCTTCCAGCA
CHR	1616392	Fwd	31.7267	e011								aTSS	HVO_1744	1744n2				5.64		-28	CGCGTGACTGAGCAGTCCACAGTGGAGCATATCCGGCGTCGTCAAGACGATGGACGGGTCTTCGTCACGTG
CHR	1616824	Rev	63.2367	e011			1616816	8	HVO_1744	783	RRR							6.41		-28	AGATAAGAACCTCGTTCGCCGATGGCGACAAGTCGAGGGCCATATCCCTATATGCGGGCACGCAGTATCCA
CHR	1616918	Fwd	157.41	e110			1616925	7	HVO_1745	227	CHY							8.85		-28	GGATATGGCCCTCGACTTGTCGCCATCGGCGAACGAGGTTCTTATCTAGGTGCTCGGACAACAATCTCGTG
CHR	1617595	Rev	117.613	e10-								aTSS	HVO_1745	1745n					3.05	-28	AAACGGCATAGAAACGGGTACGACTGCTTGATTGAAAAGGTTCAGGACCGTCGGCGTTCAGTTCTCGAAGA
CHR	1617657	Fwd	39.8733	e10-	1617657	0			HVO_1746	323	GEN							6.45		-28	CAGTGACCTCTTCGAGAACTGAACGCCGACGGTCCTGAACCTTTTCAATCAAGCAGTCGTACCCGTTTCTA
CHR	1618328	Fwd	85.4367	e011								iTSS	HVO_1746	1746n							AGTACGGCTCGGTTCAGCGAACGTCGCGTCGTAACCGCTCGTTGAAAGACGAGGAAGACGTACTGGCCACA
CHR	1618877	Fwd	7.86333	e--1								aTSS	HVO_1747A	1747An				6.33		-28	GATGCTATCGCACGAGTCGTGTTTCGAGGGCGTCGACCGCGTTATCGTCGCCCAGTTCGCGTACGACCTCA
CHR	1619596	Fwd	182.907	e011	1619596	0			HVO_1749	284	CHY							5.9		-28	GGTCGCGCGACGCGGTGACACGCTCCGAGGAAAAGTAATCGTTATACGCCGCGTGGCCCATGCCGAAACCA
CHR	1620693	Rev	23.3467	e11-	1620693	0			HVO_1750	76	CHY								1.36	-27	CGTTCCGCCGCCTCATTCCGTACCTCCGGTTCGCCGTCTGACTTTTCCCCTCGCGCATCGAGTCTCTCGGA
CHR	1624152	Rev	45.2533	e111	1624152	0			HVO_1752	199	REG								3.11	-26	CCGATTCGACTTTCGAATCGAAAGCCGAGCGCGAGGAACACCTATGACATCGTGGTCCCTATCGGGATGCA
CHR	1624604	Fwd	314.523	e111	1624604	0			HVO_1754	60	CHY							5.8		-28	GGCGCGACCGACGCGTCGGTTCGACGCGCCGACCTGAACAGTTTTAGCCGGCGACCCGCTACGCTCGACCA
CHR	1624895	Fwd	28.6133	e111	1624895	0			HVO_1755	119	CHY										AACACATCAGTCCGTTGTCTCTCGCTTCGGGTGCAGACGGTTACAAGAGGCCGCGGTTCTAACCCCGCCTG
CHR	1625896	Rev	108.18	e001	1625896	0			HVO_1756	207	GEN										CCGGTTTTCGAATCCTCGGAAACTGGGAATCGGCGGCCGCCCTCAAGGGTCGCGCTCGCGCCGTTCCCGTA
CHR	1626005	Fwd	473.693	e-01			1626020	15	HVO_1757	178	GEN								3.53	-29	CGATTCCCAGTTTCCGAGGATTCGAAAACCGGTCCGGATTTATAACGTCCCGGCGGTCCACGCTTCACATG
CHR	1626452	Fwd	46.69	e--1								iTSS	HVO_1757	1757n							CTACCTCGGCAACGCCGAGTGGGGCCACGGCCTCGTCAACGGCGACCTGCTGGGGCTCGTGATGTTCCTCG
CHR	1626715	Fwd	46.7367	e111			1626783	68	HVO_1758	329	GEN							6.22		-28	CGCGTGTCGGTGGGTTTAGGAGTCCCTAAAATCCGAAAGTGGTTTATTGTATTAGGGACGCCTAAAACGTA
CHR	1630323	Rev	31.3067	e101	1630323	0			HVO_1761	157	MIS							6.5		-28	ACGGTGACGCGAACCCCCGGTGGGATGCCTCGATGGCGACTTTTATGCGCGTCCTCCGCCGACCCCCGCTA
CHR	1631157	Rev	23.0233	e--1	1631157	0			HVO_1762	256	EM								3.01	-31	CGAGGACTAAACCACGACGAGACGGCCGGTGGCCGTGGATTTATGCTCGCGAGTTCCTACTAGCCCCGATG
CHR	1631305	Fwd	54.5633	e011	1631305	0			HVO_1763	333	GEN								2.73	-28	GCGTGACGGGGACGACCGATCGCGGCCGCGAGCCGCGGCGGTTTTGTAGCGGGCCTCGCTTGCTTCGGGTG
CHR	1633133	Fwd	10.03	e111								aTSS	HVO_1764	1764n					1.54	-30	CCCTCCGCGGTCGCGGTCGCGCCGCCGAAGCCGGAGCGACTGTCGTGCTCCGAGACGATGAGGTCGTAGTA
CHR	1634006	Fwd	56.5	e011								iTSS	HVO_1766	1766n1					1.38	-27	CGATGAACACGAACCAGCTCTCGAACGAACTCGACCTGAACTACAAGACCGTCCAGCACCACCTGGAGATG
CHR	1634115	Rev	5.09333	e--1								aTSS	HVO_1766	1766n2							AGCCCCATCTCGGCCCGCAGCGCCTGCGACGGGAGACGGGTTCAGGCGTCTTCGTCTCCGAGTTCGGTCTG
CHR	1634445	Rev	8.51333	e111								aTSS	HVO_1767	1767n1				9.12		-28	CGCCCCGAGAGGGGCAACAGCCCGAGGCTGACGACGAAGACGATTTGGAGGACGATAGCGACCCAGAACCG
CHR	1634753	Rev	19.59	e011								aTSS	HVO_1767	1767n2							ACCCGAACGCGAGGCCGACCACCGTGAGTGAACTCGTAAAGGCGTTTTGCAGCATGTACTTGTATTCGATG
CHR	1641351	Rev	2.53333	e11-								aTSS	HVO_1775	1775n					2.82	-28	CGCCCGACGGAAGGTCGGCCGTCGCGGCGACCTCGGTGAGGTTGTTCAGGATGTTACCGATAGGGCAGACG
CHR	1645244	Rev	9.25333	e111								iTSS	HVO_1779	1779n1				9.39		-28	CGACGACGGCGCGCGCACGACCGAGGAAGTGGTCGACGCGATTATCGGCATCGCCGACCACTCGCGGGATA
CHR	1645299	Fwd	8.55	e1-1								aTSS	HVO_1779	1779n2				7.6		-28	CGCTCTGTTCTGCGATATCCCGCGAGTGGTCGGCGATGCCGATAATCGCGTCGACCACTTCCTCGGTCGTG
CHR	1646151	Rev	9.55667	e1--								iTSS	HVO_1779	1779n3				6.09		-28	GCGAGGAGGCGAAAGCCGAAGTCGAGCGCCTGAACGAGCAGTTGATGGTGCAGGCCGACGAACTCGCCGCG
CHR	1646216	Rev	5.32667	e--1								iTSS	HVO_1779	1779n4							GAACTGGTTCTCTGTCGAGCGCTCCCGCGAGGAGACCAGACAGAAGATGCAGAGCCTCGAAGACAGCGAGG
CHR	1646522	Rev	10.18	e--1								iTSS	HVO_1779	1779n5							CCCGCGCCGGATACGGAGCGGCTTCGCATCAATCGGGTTGCTGACGTGTTCGGCTCTGCTCGTCTACTTCT
CHR	1647441	Fwd	54.43	e111	1647441	0			HVO_1780	171	CHY										CGTTGTTCTTTGTCTCTACACATATTTCCAACCTAGTGGATATATGTTTCACCACCTCGTAGAGTCAAGCA
CHR	1647911	Rev	28.1867	e--1								aTSS	HVO_1780	1780n1							GATAGTTCCTGATAACTCCATTTGGTCACGCGGAGATAGAGTCTCGTTTGGTCGCCCAGTCGTACTCGTTG
CHR	1647952	Rev	20.79	e111								aTSS	HVO_1780	1780n2					3.61	-29	CTCTGCAAAACGTCCTTCAGCCCTTCGTAGACCGAACTGTCGATAGTTCCTGATAACTCCATTTGGTCACG
CHR	1648217	Fwd	12.13	e--1								iTSS	HVO_1781	1781n							GAGTGGCGGTTCGTCGGAGACGAGCCACAATTTCGGATACATTACGCTGACCCGAATACGGGGTTCAACTG
CHR	1649600	Fwd	48.9867	e-1-								aTSS	HVO_1782	1782n				10.29		-28	GTGAGAGAGCAACTTCCTCGTCAAGAGAGTTGACGAGGAAGTTAAGGAGCTGGTCCTCGTGGATTTCATCG
CHR	1652155	Fwd	55.57	e0-1	1652155	0			HVO_1787	107	CHY										GCCGTCGCGCTCCCCCGCGGGGATTGCGGGCGTCGTCCCGCATAGGTAGCCGGAGCGACGAGGGTGAGGTA
CHR	1652310	Rev	6.10333	e111								aTSS	HVO_1787	1787n							CGGGAACGCCCGTCTGGCCGCAGGCAATGCACTGGCCGTACACTTTCGCGGAGACGGTTCTACCATCCGCG
CHR	1652561	Fwd	24.35	e--1			1652567	6	HVO_1788	592	MIS										GCTTTTGGGCAGCACCGGGAAGGGTTGACGGTACGCTCGGGGCCTTACGTGGGCACGTATATGGACATTCA
CHR	1653106	Fwd	11.5267	e11-								iTSS	HVO_1788	1788n1							ACGTCGACGCGCTCCCCGTCGCGATGGAGCTCAACGAGACGTTCAAGGGCAACGACGACCACTCGAACCTC
CHR	1654174	Rev	2.77667	e1--								aTSS	HVO_1788	1788n2							TGTGCATCATCGGGTCCTCGTAGCTGGTCTCTTCGGGTTCGACTAGTTCGGCCAGCTCCTCTTCGTCCGTC
CHR	1654408	Fwd	18.1067	e100	1654412	4			HVO_1789	94	CHY								3.74	-27	ACGACTGAGCGGGTCGCCTCGGTGACGACGCCGCCGCGCTATCTATTTACGACGACACCGAACAGTACTCA
CHR	1654630	Rev	9.44	e11-								aTSS	HVO_1789	1789n				7.16		-28	GCGGTCAGTCCTGCTGTTCGGCTTCGACGCGGTCGGCGTGTTCTTCGAGGTCGGCCGCGATTTTTCGGGCC
CHR	1656977	Rev	31.1733	e11-			1656925	52	HVO_1791	315	TP										CGAATTATAGATCGATTGGTGCAGCAAAATATAGAATATCTATTCTAATCTCCAACTCAAATCAAATCTCT
CHR	1657128	Fwd	74.53	e101	1657128	0			HVO_1792	162	REG								3.38	-27	AGAGCGCGAGAGAGGTGGCGAAAACGGCGGACAGAACAAGGACTTACGTCACCGACCGCAACGAGAGGGTA
CHR	1657504	Rev	13.5333	e111								aTSS	HVO_1792	1792n							GTAGCTCTGGAGCGCCCGGTGGCTGTCGCGCATCGAGGAGATGACGAACGTCGAGTTCGTTCGCTCGACTT
CHR	1657661	Fwd	65.4067	e111	1657661	0			HVO_1792A	91	CHY										TCGACGAGTTGGGTATCGAGGACTGAGAGTCGGCCGAGGGAGTATCACGGGAGGCCACGTACTACCGACCA
CHR	1658127	Fwd	16.1167	e--1								aTSS	HVO_1793	1793n					1.42	-31	GAGGTAGAGTCCGAGGCCGGTCCCGGTGCTTTCGAGTCCCTTTTCCCCTTTCCGAAGACCACCGACTTCCG
CHR	1660321	Rev	17.0867	e111								intergenic		1795n					2.95	-30	ACGAACGGAACTTCCCGTCGGGTGCATCCGAAGCCATGGTTTTAGGTTGGCCTAAATAACCATAGTCGTTG
CHR	1660355	Fwd	189.747	e001	1660355	0			HVO_1796	46	CHY										CGCGGCCGACCCGCTGAAGGCAGTGCGCACTCACCGCAACGACTATGGTTATTTAGGCCAACCTAAAACCA
CHR	1661889	Fwd	15.6633	e11-	1661889	0			HVO_1798	125	CHY										CGCGAGGCCAGAGGGACTCGGCGGGCTCGCGGGCTCGACGCTTTTCACGCCGGCCGCCGTCTCCCGAGTCG
CHR	1663335	Fwd	7.55	e1-1								aTSS	HVO_1799	1799n				9.48		-28	GGTACTCCGCGCCGTCGGCCTCCGCCTCGTCGACGAGCCAGTTTTTGAAGTCGGCAAACTCGAGGACTGCA
CHR	1663840	Rev	18.4067	e0-1			1663783	57	HVO_1800	47	HY										TCGGCGCGCTCGAAGCCGCCTACGGCGGCTACCGCGAGTTCCAAGTCCGCCGCATCCCGAAAGCCTGAACG
CHR	1664154	Rev	6.17	e--1	1664154	0			HVO_1801	103	CHY										CGCAGACGGGGGTTTTCACCCGGACGAATCGGCCGAGTCCTTCTTTGGCATGGCCCCCGTAGAGAGAGTCG
CHR	1665405	Rev	7.19	e1-1								iTSS	HVO_1802	1802n				5.07		-28	CGCTTTGTCGGTCGAGCCGTTTTCGCGCCGTCGGGAAACGCTCTTGACCGTTCGCCGCCGCAGTCTCGGTA
CHR	1665924	Rev	250.703	e-10											HVO_1802R	1665927	-3	6.3		-28	CGTGCGGCTAAACCCCGGTAGGACCCCGTTAATCGAACCGCTTATCCGACCGACCTGACTAGGGTAGGTCG
CHR	1666075	Fwd	564.513	e101	1666075	0			HVO_1803	200	GEN								3	-28	ACGAAACTACATAACAACGGGATAACATCCGAGGGAAGCGTTGAAGTCACCACAGAACTTGAATGGTAATA
CHR	1668394	Fwd	9.21	e--1								aTSS	HVO_1806	1806n					2.75	-30	CTGGACATACGGAGCGGCTGTCGGTCCGGTCACAAATGCTTTCTTCTAGCTTCGCTCGTGAACCTCGTCCA
CHR	1669891	Fwd	16.0867	e111								aTSS	HVO_1807	1807n							AAAAGCGTCCCGGCGCGGGGTCAGCAGATTGCGACGACGGAGCTGTACGTCTCGTTTTCGTACCTGACGTA
CHR	1671908	Fwd	9.36667	e--1	1671908	0			HVO_1809	190	GEN								2.78	-28	CCTTGTCGGGTTCGGGCGTCGAATCGAACCGGCGCGTACTGTTTTGGTCGTCCCGGCGCAACCCACGCGCA
CHR	1673072	Fwd	7.01667	e--1			1673282	210	HVO_1811	859	SIG							5.48		-28	GCTGGACGATTGCCGCGGCCTCGGCGGGAAAGTCGTCGGCCATATCACGAACGAGTGTGTCAAATAGTATG
CHR	1673256	Fwd	55.31	e111			1673282	26	HVO_1811	859	SIG								4.05	-28	ACCGACCGGCGAGTGAGCCGAGCGGACGGGAGCCGTAGAGCACTTATCAGTCCGGTGGTGAGTGAAATATA
CHR	1673282	Fwd	100.437	e11-	1673282	0			HVO_1811	859	SIG										CGGGAGCCGTAGAGCACTTATCAGTCCGGTGGTGAGTGAAATATATACACGTTCACGGAGTGATACGGGTA
CHR	1677021	Rev	29.22	e111								aTSS	HVO_1812	1812n1				6.45		-28	GATTCTAGTAATATATCTGACCCTTGTGTGGACAATCGGTATTTAAGCGGCGTCGAAGTAATCGAGATACC
CHR	1677107	Fwd	66.32	e111								intergenic		1812n2				6.59		-28	CGACGCCGCTTAAATACCGATTGTCCACACAAGGGTCAGATATATTACTAGAATCGGCGTACCGATATGCG
CHR	1677749	Rev	28.4167	e011			1677677	72	HVO_1813	142	REG								4.34	-28	TTTAAACACATTTACTATGAAAGGATTAGTCTCCGCAAAAAATATCCTTCGGTCGCCCGTATTTTTCTCCG
CHR	1678811	Rev	12.0633	e110	1678811	0			HVO_1814	303	CHY										CGCGGATGACGCGCATGCCCGAGAGAACCACCCCGACGTACCTAAGCGCACCCGTCCCGTCCCGACGACCA
CHR	1679617	Fwd	5.74333	e--1	1679617	0			HVO_1816	429	NUM										GCGTGAGCGACTGACTGCGACCGCTCCCCGAACCGCCGGACTTAGCACCCGGCGCGTCGCACCCCCTCGTA
CHR	1681370	Rev	9.98333	e--1	1681369	1			HVO_1817	147	CHY								4.5	-28	GTCCGGTCCGGCGGGGGTCCCGACACCCGACGGCGGAACTGCTATCTGTCTCCCCGCCGACAGTCGGCCCG
CHR	1681492	Fwd	9.54	e111	1681496	4			HVO_1818	175	CHY							7.58		-29	GACCCCCGCCGGACCGGACGAACCCGACGCAAGCGAATCTTTTTCCCGTCCGACTCCCCGAGGGAGTGACA
CHR	1682775	Rev	6.86333	e--1	1682775	0			HVO_1819	229	CHY								3.52	-28	GCGACATCCCCGCCAGCGGGGGACCGCGCGTCGCGGAACCCTTTTCGGCCGTGCCGCGGTAGCCCGCGGTA
CHR	1682896	Fwd	65.6667	e111	1682896	0			HVO_1820	122	GEN							5.71		-29	CCCGCTGGCGGGGATGTCGCCCCCCGTTTCCGGGTAAGGGTTTTCTATCGCGCCCGCGAGATTGGGAATCA
CHR	1684322	Rev	35.1667	e-11	1684322	0			HVO_1822	151	GEN							5.39		-28	CCAGTCTGGGGCGGCCGGCCGGCGGGACCGTGGGGTGAGTTTTTTGTCGTCCCCCGACGCAGGTGGGGACA
CHR	1684424	Fwd	20.1133	e111	1684424	0			HVO_1823	153	GEN								2.62	-30	CTCACCCCACGGTCCCGCCGGCCGGCCGCCCCAGACTGGTTTTATGCCGCCGCGCCGTGAACCCGAAGCCA
CHR	1684989	Fwd	147.09	e111	1684989	0			HVO_1824	429	CHY							6.6		-27	CGGGACGTTCGGCGCGGTCTCCGCCGACGGAATCGGGAGGAGTTTTCCCCGTCGCGCCCGAGTTCGGCGTA
CHR	1686752	Rev	64.4233	e010	1686752	0			HVO_1825	142	CHY								3.21	-28	CCCGTCCGACGAGTGACCGGTCGGACTCCGAGACACGCCGCTTTTACGCGCCGACCGCCCTAGGCGGGGTA
CHR	1687670	Rev	89.6067	e010	1687670	0			HVO_1827	133	TL							9.84		-28	CGATTCGGTGGGTGCGGTCCCGAGACGCGCTTTCGACGTACTTTTTATCCGCGACCGTTTTCATCCGCGCA
CHR	1688198	Rev	80.82	e110								intergenic		1828n					4.23	-27	GTCGTCCAGCGGAACGGTACGTTCCGGTGGGAAGACGGGTTTTAACCCGCCGCAGCGCCGTCTCTGTCTTC
CHR	1688660	Fwd	41.1867	e111								aTSS	HVO_1829	1829n							GACGCGCTGACCCTCAAGCGTCATCGGCACGTCGAAGAACACCTCGCCCTCGACGGCGTCTTCGACGGGTG
CHR	1689318	Rev	29.2533	e111	1689318	0			HVO_1829	364	GEN								4.7	-27	TGTGACCGAAGGCGGGCGACCTCGCGCCCGCAGCCGCCGACGTTTTTACCGCCGCGCGCGAGGGTCGCGTA
CHR	1689487	Fwd	26.3567	e--1	1689487	0			HVO_1830	299	CIM								3.01	-29	GTCGACGCGACGACGACCGCGCACGCGCCAAACCACAACCACTACCACCCCCCGCGGACGATGCCGACGCA
CHR	1690567	Fwd	110.21	e101	1690567	0			HVO_1831	193	EM							7.74		-28	GCGAAATCGACCGCCCGCGGGTGCCGCCACAATCACAATTTCCTTAACCCCTCCCTCCATATCCGCCGGTA
CHR	1691335	Fwd	34.6033	e100	1691338	3			HVO_1832	488	GEN								4.03	-27	GTGCCGGGACGTTCCAGCGTTCGAAGACGCCTATCGACGCTTTCAAACGGTCTCCGCGTGTCTCACCTGTT
CHR	1692862	Fwd	1177.24	e111											HVO_1833	1692867	5	6.99		-28	GGTCGGAACGTAATCGGCCGCCGGCGCGGGTTCCACAACGGTTTTACGTCGGTGACGTGTAGCTCCCTCCG
CHR	1693427	Fwd	8.76	e1-1								intergenic		1832n1					1.81	-28	GATGCTCAAAGCTGTGGGTCCGAACAACTCGTTCAGTCACGTTCTCTTGGAGTGGGTTCATACAACGCCCA
CHR	1693442	Fwd	12.7867	e--1								intergenic		1832n2							GGGTCCGAACAACTCGTTCAGTCACGTTCTCTTGGAGTGGGTTCATACAACGCCCACCTCACTTCTCGGCA
CHR	1693458	Rev	15.3067	e10-								intergenic		1832n3					3.31	-28	ACCTAATTCTGGACTCACGTCACCGGGGTTCAGACTCGGGGTTATCTCGATAGCTATCCTTCTGATCTCGG
CHR	1693502	Fwd	32.4767	e011								intergenic		1832n4							ACTTCTCGGCATCGTCTGAACGTAGACCGAGATCAGAAGGATAGCTATCGAGATAACCCCGAGTCTGAACC
CHR	1693516	Rev	7.66	e--1								intergenic		1832n5					4.33	-28	TTGCTTGAGGTGGTGGTATAGCCATGCCCTTTGAGAAAGCACCAAGTAAGCTGGCGTCACCTAATTCTGGA
CHR	1693598	Fwd	35.0267	e1-1								intergenic		1832An1							TGACGCCAGCTTACTTGGTGCTTTCTCAAAGGGCATGGCTATACCACCACCTCAAGCAAACCCTCACAATG
CHR	1693766	Rev	23.19	e--1								intergenic		1832An2				5.63		-28	CTTTGTGTACGGTCGAGTACGCACCGTATACAAGCAAACTTGTATATAGTACAAGCACAATTGTTTATTTA
CHR	1693882	Fwd	483.803	e110											HVO_1832s3	1693883	1	6.31		-27	GGTGCGTACTCGACCGTACACAAAGTTTGAGTAACCGTGACTTTAAGTACCTCAAATCACGAGGTCCGGTA
CHR	1694013	Fwd	33.1133	e001								iTSS	HVO_1832s3	1832An3							ATTTGACCGAGCGACCGACCGACCCGGAATAACCGAAAACCTCACCCACCAGGGTAGGAAGACGGACCACG
CHR	1694482	Fwd	18.9867	e--1			1694560	78	HVO_1835	450	ISH								2.59	-26	CACACGGTCGTATTGTGCGCTCTCTATGAGTCTTCCATCGTCTTTCTCGAATCCGATTGGAGCAGGTCCCA
CHR	1694498	Rev	75.74	e01-								intergenic		1834n1					4.22	-29	ACTTCCCACCGGGTTTCTCAATCAGGTAGTTGCGACGATATCAAATCAACAGACAGCAACTGGATTCTTCG
CHR	1694587	Rev	51.0167	e01-								aTSS	HVO_1835	1835n1				7.41		-28	GTTGCGCGAGCGCGCTCGCGCAACTCATCAGAGGGAAACGCTCTTTGAATCCGGTCAACTATGACCGAATC
CHR	1695522	Fwd	6.04	e1-1								iTSS	HVO_1835	1835n2					1.67	-26	ATCTGGCGAGAGAGGACTACAGCGCGCCCGATATCGCGCAGCTCTATCGGGCGCGCTGGGAGGTCGAACTG
CHR	1695646	Fwd	22.6933	e1-1								iTSS	HVO_1835	1835n3							CGGCTACATCATCGAGGCGCTGATCATCATGGCCGCAATTTCGTTGATGATGAGTCGTGTAATCGTGGATG
CHR	1696228	Rev	33.7633	e101								iTSS	HVO_1834	1834n2				5.13		-28	GCCCTCTCAGAGCTTCAGGTGTACCGAGACAAGGCAACAGGTACAAACACCTCCCGAGAGGGTTACAAGCG
CHR	1696397	Rev	441.04	e010	1696397	0			HVO_1834	221	RRR										GATGCAGTTACGGTCCTTCTCGCACAGTCTGGGCGTAAAGGCTACCCTTTTTAAGTGCTAAGTGGTGGGCA
CHR	1696509	Rev	19.68	e0-1			1696397	112	HVO_1834	221	RRR										TTCCTCGGCTTCAAGATCCATATCGCTATTTCCCATACCGTTTGACAATGGAATAGGGTCTTAAAAACTTG
CHR	1696675	Fwd	59.6533	e--1								iTSS	HVO_1838	1838n1					3.76	-30	AACGAACCCGTATCTTCCGTGTTCCGATCTTCCAAAGGGAGTATAAGTGGAAACAGAAGCAACGTTCCGAA
CHR	1698155	Fwd	52.1	e-1-								aTSS	HVO_1837	1837n				10.29		-28	GAGTGAGTGCAACTTCCTCGTCAAGGGAGTTGACGAGGAAGTTAAGGAGCTGGTCCTCGTGGATTGAACCG
CHR	1698294	Fwd	31.9133	e-11								iTSS	HVO_1838	1838n2					4.51	-29	TGAGTCTGCGCAATTCGAGATGCTGCAGATCTCCACGATAACAAAAACGTAGAGAGCATACTCACGACACA
CHR	1698323	Fwd	73.1133	e0-1								iTSS	HVO_1838	1838n3							TCTCCACGATAACAAAAACGTAGAGAGCATACTCACGACACATGATAAGAACGGAGACGAAATACGAACTC
CHR	1698452	Fwd	37.2967	e--1								iTSS	HVO_1838	1838n4					4.31	-28	GCTGATTGAAGAGGATCACCGAATCCGTGAAGCATACGATTTCTTCAAGCAGAAGCTATCTGATCTGGATA
CHR	1698723	Rev	28.3633	e001								aTSS	HVO_1838	1838n5				8.04		-28	GTAGAAGTCTTTGGTGGTCACTCTACTCCGAACGTCGTATTCTTCGTCGACAATCAAGTAGTGCGTAAACG
CHR	1698867	Fwd	151.453	e001								iTSS	HVO_1838	1838n6							ACATTCGCGGCTGCTTTGGACAAGCATGAGGGGGCAACAGAGATACGTCGATTCATCTCAAAGCTTGAGGA
CHR	1699380	Rev	55.24	e11-								aTSS	HVO_1838	1838n7							AAGTCTGGATTTGTAGTGATCAAAGCGTTCCTCATTATGATTGAAGACCGCTGCCCATGTGCTATATCTCT
CHR	1699424	Rev	10.0233	e--1								aTSS	HVO_1838	1838n8							CTTACTCTCGAATTCTGCCGGTCTGCAAGTAGCGTAAGGTTTCCAAGTCTGGATTTGTAGTGATCAAAGCG
CHR	1699645	Rev	14.7767	e--1								aTSS	HVO_1838	1838n9				6.18		-28	ACCTAAACAATATCTGAATAGGACGGTATCCACAGCAACCTTTAGCCTATTTTTGAACTAGGTCTTACACA
CHR	1699822	Fwd	60.51	e110								aTSS	HVO_1839	1839n1					4.13	-30	TCTGATCGTAGTGCTTTGAGAGAACTTGCTGACCAACGTTCATACGGTCGCTAACAACTTTCTCAGGAACA
CHR	1700082	Rev	74.87	e111								iTSS	HVO_1839	1839n2							TTCTGAGGGGGAGAGACTAGTTGCACTCCGACCGGATACGTGTGAAGTGCTTACGGACTGGATAGAGAATG
CHR	1700700	Rev	15.09	e--1								iTSS	HVO_1839	1839n3					1.84	-28	ATTGCACGTATCGCTGTTTCAGTCTGGCTTCCCAAACAGAACCATGCCAGACCAACACGACTTGGAACCTA
CHR	1700761	Rev	7.07333	e11-			1700727	34	HVO_1839	342	RRR										CGGGATTTGAACCCGCGACATTGTATGAAATAAACTCAAAAACAAGGTCTGTGGGCGTGCTATTGCACGTA
CHR	1700823	Fwd	8.3	e--1			1701017	194	HVO_1840	77	GEN										AACAGCGATACGTGCAATAGCACGCCCACAGACCTTGTTTTTGAGTTTATTTCATACAATGTCGCGGGTTC
CHR	1703143	Rev	14.7567	e--1								intergenic		1841n				5.55		-28	CCCTTTCGCGTGCATCAGGTGGAGATGCGGAGGCGGAGGGTTATTTTTCCCCAGTTGTGACGTTAGTCACA
CHR	1703719	Fwd	1950.57	e011								intergenic		1841An				6.48		-28	TCTCGATCACGATAAACTCGAGCCGTGAACCACGGAAAGACTCAAGCCGATCTACTTCGTTGATTTATTCA
CHR	1704051	Fwd	108.333	e-10			1704184	133	HVO_1843	75	CHY										AACCGACCACCACCGGAACCCCGCCAAACTGAACCATATAGTAAGTAATTATACGCCGCCAAGGGGGTGTG
CHR	1704065	Rev	30.0567	e011			1703846	219	HVO_1842	41	HY										GTCACCAACCACGAATACAGGCCGTGGTCGGTGTCAAACGTAAAATTACTAGACCGCGCACACTTCGAGCA
CHR	1704177	Fwd	47.4867	e01-			1704184	7	HVO_1843	75	CHY										GACCACGGCCTGTATTCGTGGTTGGTGACTTAGGAGATAGAACTAAGTAGGATTGGGTGGCCGGTGAGGTG
CHR	1704270	Rev	21.8133	e111								aTSS	HVO_1843	1843n							GAACGACGTAGACGCCTTTGCCCAACCGCTGAACGTGCATGTTCTGGTCCTCGCGCTCATCCTCATCAGCA
CHR	1704709	Rev	50.29	e-1-								aTSS	HVO_1845	1845n1				10.29		-28	GTGAGAGAGCAACTTCCTCGTCAAGAGAGTTGACGAGGAAGTTAAGGAGCTGGTCCTCGTGGATTTCATCG
CHR	1706061	Rev	19.3167	e-11								intergenic		1845n2				6.17		-28	CCAGCCCTCGAATTTTCTTTAAGTGGGGATACTGATAAGCGTTTATTTTCGCTGCCCCCTCCTGCTTTGTA
CHR	1706123	Fwd	214.353	e110											HVO_1846	1706125	2	5.35		-28	GAACGGGGTACAAAGCAGGAGGGGGCAGCGAAAATAAACGCTTATCAGTATCCCCACTTAAAGAAAATTCG
CHR	1706209	Fwd	304.33	e10-								intergenic		1845n3							GTTAGGCAGAGCGTCTGGCTTTTAACCAGACGGTCGGGGGTTCAAGTCCCTCCCAGCCCGTTTCTACTCCG
CHR	1708447	Fwd	16.4033	e1-0								intergenic		1848n					2.53	-28	GAACTCATGTCGGGTACTGTGACGCGCGCGGCTGGTAAGCCTTATCAATCGACCGGCGAAGCGGGGACGAG
CHR	1708629	Rev	84.12	e011			1708622	7	HVO_1848A	51	GEN							5.87		-28	CCGCGGTCGGGGTCGGTGTCGGATGCCGAAAATCGCCCACAACATCTAACTCAGTTGACGTGGTACGCACG
CHR	1710439	Rev	26.8233	e--1	1710439	0			HVO_1850	108	CHY								2.31	-28	GGTCCGCACCGCGCCCCCGCGCCGCGTATCGACCAGTAGACACATCACGCGGCTCGCCGTCGGCTCACGCA
CHR	1711206	Rev	24.5567	e011	1711206	0			HVO_1851	215	GEN								1.74	-27	AATAGCCCTCCGGAGCGGTTGGGGTCGCACATAGCAACGTTATCGTCGGTCGAGGCCGAACGATTCGACCA
CHR	1712145	Rev	20.95	e1-1	1712145	0			HVO_1852	283	RMT								1.47	-28	CGATGCGGTCGGGCGGGGCGCGACGGCGCGGGTGGCGTCGGTTAAGTAGTCCGCCGAGCAAGCACCCGTCA
CHR	1714081	Rev	34.18	e101	1714081	0			HVO_1854	431	TL								1.65	-28	CGCCCTCGTCGGGTAGTCGCCGTCGCCCCGAACAACAGGTTTCAAGCGCGACCTGCGCCAACCAACGCCCA
CHR	1715041	Rev	51.4867	e010	1715041	0			HVO_1855	301	TP								4.22	-29	CACCCGCTCCCCCGGCGCGCCCCCGGTTCGTACCGCGTCGTTTTTCACGCCGCCGCGCGCCGGGTGAGGCA
CHR	1715777	Rev	112.833	e001								iTSS	HVO_1857	1857n							CCCTCGCCCAGAGCGGGCGCATTCAGGGCCGCATCGACGACGACAAGATGAAGGCGCTCCTGAAGGAGCTG
CHR	1716100	Rev	417.607	e011	1716100	0			HVO_1857	120	GEN							5.24		-28	GCGGATTCCCCGAGAGCCGTCTGTATGCGGGTCCGTAATGGTTTTCAGACATCGGACCGTGCGCTAGGGTA
CHR	1716434	Fwd	0.656667	e1-1								aTSS	HVO_1858	1858n							TGATGTTCTTGCTGCCGGCGTCGCTGTGCGCACCGGAGACGCTGTATCGGTTGGAGCCGCGCTTGAGGCCG
CHR	1716661	Rev	319.91	e111	1716661	0			HVO_1858	151	TL							8.51		-28	CAGGAGCCTCCAACCGCCCGTATCGGGCGAATACGATGCCTTTAAACGCCGCGATTATGAACCAATAGCCA
CHR	1716836	Rev	4.98667	e1-1								iTSS	HVO_1859	1859n					1.62	-27	CGAGCTCCGCCGTCTCGTTCGACGTGGCGACCGCCGGCATCGTCGTCTTCCGGGGGTTCGTCTACTGGGTG
CHR	1717971	Fwd	9.90667	e111	1717971	0			HVO_1861	297	COM								3.8	-27	CCCCGGTCGGCGACACCGCCGCTCACTTTCGGATAGATGGACATTTCCGCTCCGCCCGACACGTCCCCATA
CHR	1719329	Rev	18.6933	e1-1								iTSS	HVO_1862	1862n					2.84	-31	CCCGAGCGAGGTCCTCGGCCGGTCCGGAGACATGATCGTCTTCAACAACCCACCGCTCCTCGACGCCATCG
CHR	1720750	Rev	94.9367	e010			1720738	12	HVO_1863	81	CHY								3.8	-31	GGCTGAAAGCGGCCGAACTAATTCTAACGGACCTTCCTTTATAACAGGTACTGGGGCGATAGGTGGAAGTG
CHR	1720771	Rev	7.86667	e--1			1720738	33	HVO_1863	81	CHY								2.86	-30	TGTACCGTTTGCAACGATTCAGGCTGAAAGCGGCCGAACTAATTCTAACGGACCTTCCTTTATAACAGGTA
CHR	1720805	Fwd	11.6333	e--1								intergenic		1863n					3.46	-27	TCATCTGGTACACCTCACTTCCACCTATCGCCCCAGTACCTGTTATAAAGGAAGGTCCGTTAGAATTAGTT
CHR	1721830	Rev	26.71	e--1	1721830	0			HVO_1864	261	COM								3.85	-28	GGAGCCGACGCCCGAGGCCGACGAGGCCGGCACGGAGCAATCTTAAACCGGCGCGGGCCGTCCTTCGGGTA
CHR	1722199	Rev	8.5	e--1	1722199	0			HVO_1865	114	CHY								4.22	-28	ATCTTAAGGGTTATCAACTGCGAGACGCCCGTGTCGGGGGCTTTAAACCACTCTCGCGGCGACTACCGGTA
CHR	1722200	Fwd	2.54333	e--1			1722293	93	HVO_1866	237	NUM										GCATCGCGCCGAGCGCGAGCACCCAGCCGACGACGATGAGCGTAACCGTCTCCACGGTGACGAGTCGCATA
CHR	1722292	Fwd	17.2567	e-11	1722293	1			HVO_1866	237	NUM								4.48	-28	GTTTAAAGCCCCCGACACGGGCGTCTCGCAGTTGATAACCCTTAAGATGCGGTCACGGATACCCGTGTGCA
CHR	1725012	Fwd	1.02333	e--1								aTSS	HVO_1868	1868n							CGACGATTCGCCCCGCGACCGAGCCGTCGGGGCCGAGCAGTTGGTAGGTGTGTTTGGCGAACGAGAACGCG
CHR	1725877	Fwd	30.4067	e1-1			1726022	145	HVO_1870	595	GEN										GACCGACGCGGACGACGACGGCGCGGTCGAAGTCGAAATCGAGTCGCCCGGCGACGACGAGGAGTAACGCG
CHR	1727916	Fwd	120.337	e011	1727916	0			HVO_1871	501	MIS							5.21		-28	CCCTTCGACGGTTCTCGAACCGCGAAAACGACTCGCAACTTCAATACCGGATGACTCCCTAGGCCCTCGTA
CHR	1729850	Rev	157.7	e-11	1729850	0			HVO_1872	82	CHY								4.42	-29	ACTTTCGGACGGACCCGAAGCCGCTGCGAGACCAAAAAAGACACAACGCTCGACCGAGTTCGGGACGACCA
CHR	1729979	Fwd	8.27	e--1								intergenic		1872n					1.72	-27	CCGTCCGAAAGTCGGTCCACTCGTCTATCCCACACCACGGTGATAACTCCAAGAGGGGCGAATTTCGGGTG
CHR	1730143	Fwd	735.283	e011								aTSS	HVO_1873	1873n					2.25	-29	AGACGGCTTCGTTGCCGCTGCCGTCGTCGTTTCGGGTCCTTTTTCCGGCGGTCGCGCCTCAGCGTCCGTCG
CHR	1731374	Rev	667.64	e111	1731374	0			HVO_1874	357	GEN								4.27	-28	GCGCGGCGGGATTCCCAGCGTACGGGAACAAAACACACGGAATAAGTCGCCCCAATTCGTAGGGCCGGCCA
CHR	1731563	Fwd	13.1667	e101	1731564	1			HVO_1875	305	GEN							9.01		-28	GCCCGGAGGAAGCCTGACGCGCGGTTCGCACAACCGAATCCATTTGAATCTCGACGGCTTACGACGGTGCA
CHR	1732591	Fwd	43.7467	e-1-	1732593	2			HVO_1876	99	CHY										GACCACCGCCGAGAGCGTCAGCAGACCCGTTCGACCGAAGAACCGATATAGCATGCTAACGTAAGTCAATG
CHR	1732890	Rev	8.94	e--1								aTSS	HVO_1876	1876n					1.75	-28	TTCGTCGTCGTCGGCCATGATACGCGTAGTTAGGCGAGGGCTGATAAAACGGACTCGGCTACGAGTCGTCA
CHR	1732940	Fwd	148.68	e110	1732943	3			HVO_1876A	59	CHY							4.87		-27	ACTGCACCCGACGGCTCCGCTGACGACTCGTAGCCGAGTCCGTTTTATCAGCCCTCGCCTAACTACGCGTA
CHR	1733693	Rev	5209.95	e111											HVO_1876s	1733694	-1		3.52	-28	GTCCAGTTTTCTCGGGGGCGCGATGGGGTGAAGCGCTACGTTCAAGTGCCCCCGAAGTCTACGAATTTTTG
CHR	1733825	Fwd	238.84	e111	1733825	0			HVO_1878	276	COM								2.24	-28	AAACTGGACACTCGTCCATTGTTTTCGCGTGACACGTGGCTATTTGGGCTCCCGGTTCCAAGCGAGGCCCA
CHR	1735452	Fwd	15.55	e111	1735453	1			HVO_1880	225	CHY							5.53		-28	GTCCGTATCATACGCCCGTTGTGCCGTGGTTTTCCAAAGGTCTTTGCCCTCCCAACCGTAAGTCTCGGCCG
CHR	1736150	Rev	9.90667	e111								intergenic		1880n					2.54	-29	AGCTACCCAGGCAGGCATTCCTTGGTTGTCCGGGTTACTCTTTAGGGGTTTCGATTCGAACCGACCCGGCA
CHR	1736205	Fwd	319.493	e111											HVO_1881	1736209	4	5.66		-28	CATACGCTACCACGGTGCCGGGTCGGTTCGAATCGAAACCCCTAAAGAGTAACCCGGACAACCAAGGAATG
CHR	1738396	Fwd	42.9267	e100	1738397	1			HVO_1884	205	CHY								1.65	-28	AAACGGTGTCGGTGGTCGTGCTAGCTAGTACCACGGTCGAATTTAGGGCGCTCAGGCCGTAGCACACCGCA
CHR	1738881	Fwd	29.9967	e011								iTSS	HVO_1884	1884n					1.81	-29	TGGGAGGTGTTGGAGTTCGGCGCGCGCCTCGCCGCAGAAGCCATCGGCTCTGAGGCCGTCCTCGTCCAGTA
CHR	1739055	Fwd	10.6367	e-1-	1739055	0			HVO_1885	217	GEN							4.96		-28	AGGGAACGCCTCGAACGGACTCGGTCCTGACGGGGCCATCTTTTAGCCACCCGGTGTGCATACTACTACCA
CHR	1739904	Rev	232.53	e111								intergenic		1885n					4.4	-28	ATATTGCGGGTAGATGGCGTGTGACTCCCGTCTGACGCAGATTTAAGTTTCCCCATACGTACCCGAGTATG
CHR	1742083	Rev	40.3433	e111								iTSS	HVO_1888	1888n					3.74	-28	CGGGGCGACGTTCGTCTCCCGCGGCGACGACTCCGGGACGAACAAGAAGGAACTGCTCATCTGGGAGGCCG
CHR	1742632	Rev	292.99	e011	1742632	0			HVO_1888	342	TP								4.04	-28	CCGGTATTGAAATTATTTGTGATTACGTTGCGTGGGAAACAGTTAATTCGCGTTCGGCGAACCACAATGCA
CHR	1742658	Rev	56.8533	e01-			1742632	26	HVO_1888	342	TP										ATTCGGGGTCGAATCGTTACGATGCACCGGTATTGAAATTATTTGTGATTACGTTGCGTGGGAAACAGTTA
CHR	1742719	Fwd	76.33	e-1-			1742773	54	HVO_1888A	32	CHY							8.58		-28	AACGCGAATTAACTGTTTCCCACGCAACGTAATCACAAATAATTTCAATACCGGTGCATCGTAACGATTCG
CHR	1743573	Rev	18.18	e111								iTSS	HVO_1891	1891n1							ACTTCGACCCCGTCACGACCCACAATCGCGGGGGGTCACGCTCAGGCATCGCCGGCGCGTACGGAGACGCA
CHR	1743749	Rev	23.5833	e10-	1743746	3			HVO_1891	58	CHY								4.71	-28	CGGCGGGAACTAACGCCGGTCCCGGCTCGCGAGCGAACAGTTTGATACGTTCGGCGGTGCCACATTAGCCG
CHR	1743782	Fwd	18.1933	e100								intergenic		1891n2							ACGAGTGGGAGGGAGTCGTCGCAGTCGGGAACCATCACGGCTAATGTGGCACCGCCGAACGTATCAAACTG
CHR	1744214	Rev	30.4333	e111	1744214	0			HVO_1892	135	GEN								3.92	-27	ACGCTGAACCGGAGTCGTCGACCGCGTCGCCAGTCGCTACGCTTACCTCGCCGGAGCGACCCCGAAACGCA
CHR	1744466	Fwd	9.58333	e111								aTSS	HVO_1893	1893n				4.85		-29	CGAGAACTTCGCTAACGCCCGCCCGCGATGGGAGATGCCGTTTTTCTCCTCGGCGCTCATCTCCGCGAACG
CHR	1745340	Rev	1473.67	e111	1745340	0			HVO_1894	92	CHY							6.69		-28	CGGTAGGTCGCCGCGGACTCCCCATCGGAAGGCCAAAACGATTTATCCCGAGCCGGCGTATCCGTCACACA
CHR	1747460	Fwd	1.02	e1--								intergenic		1896n							TTTCGATATCCATGGTTCAGTTACCCGTAATTCCCTCCGAAGCAAGTAAAAGGATTTCGAAGGGACGAGCG
CHR	1748541	Rev	43.1967	e--1								iTSS	HVO_1899	1899n1							CAACCGCCCCGGCGTCTACTACGAGGCCGACTTCGACGCCATCACCTACGACCCCGACATGCAGGAGGTCG
CHR	1748575	Fwd	8.36667	e--1								aTSS	HVO_1899	1899n2							CACCGAACTCGACGACTTCGACCACGATGCCGTCGACGACCTCCTGCATGTCGGGGTCGTAGGTGATGGCG
CHR	1748800	Fwd	6.38333	e--1								intergenic		1899n3					1.48	-31	TCACGTCGCCCAGGTGTCGGGGTGGGACTTCGACTGTATCTTTGAGTCGTACCCGTTTGTACATAGTTTCG
CHR	1748830	Fwd	8.59	e--1								aTSS	HVO_1900	1900n1					2.76	-30	CGACTGTATCTTTGAGTCGTACCCGTTTGTACATAGTTTCGTTAAGGTTCCGTGATTGCCAGCGTGGCGTG
CHR	1749169	Rev	20.1467	e--1								iTSS	HVO_1900	1900n2				4.83		-28	CGCGTGGGCGCTCGCTGGCGGCTCATCGGTATCGGGACGCTCAAGTGACGTGACCGCCACCGTAGTCGTCA
CHR	1750924	Fwd	6.58	e--1								aTSS	HVO_1902	1902n					2.53	-29	TCCCGCTGACGTCGAACTCCTGTCCCTCGATGGTGAACTCCTTTTCCTCGGTGAACGGGAACGTAATCTCG
CHR	1751599	Fwd	20.99	e111	1751599	0			HVO_1903	327	CHY							5.98		-28	ACGAGAACACCGACACGACCCGACGGCCGTGGGAGCGACCTTTTTGCCGCTCCGCCACCGAGCGTGTCACG
CHR	1753621	Rev	6.72333	e--1	1753620	1			HVO_1905	274	GEN								3.3	-28	AAGCAGTTGCGCCGGACGCGACCGACCGCCGTCGGCCACGTTTATACCTCGCCGTCCCCGTGGTTGAATCA
CHR	1753653	Fwd	11.6367	e1-1								intergenic		1905n							CCGGTCGTGTCGCCGGTCCCGAGGAGGGTCACGCGCATTGATTCAACCACGGGGACGGCGAGGTATAAACG
CHR	1753778	Rev	13.2333	e--1			1753620	158	HVO_1905	274	GEN								3.23	-28	ATAAATTCCGAAATCAGACAGATATCACCCAAAGATAACGCCCAAATTCGACCGAGCACTCAATGCGGACG
CHR	1753879	Fwd	11.1633	e10-			1754022	143	HVO_1906	246	CHY										CGTTATCTTTGGGTGATATCTGTCTGATTTCGGAATTTATTCATCGTCATTGCGAGCGAACGGATTTCTCA
CHR	1754693	Rev	115.357	e11-								aTSS	HVO_1906	1906n							GCTAGTTCGACACCATCTGCCCCTTTTTCCGCCGATTCGATTGATACCGACTCCACGCGTACTGGAGTCCC
CHR	1756232	Rev	574.863	e-11	1756231	1			HVO_1907	474	GEN							5.21		-28	TCGGTCGGTCGCGCGCGGCACCCGACGACGCTCCGACGCTCTTATGCGTCTCCCCGGGCAATTTCTGGGGG
CHR	1756448	Rev	124.97	e111											HVO_1907s	1756448	0				TCACTTTCTTGGCTCACAGTGGCGGAAGATAACCATAAAGACCTAATCGTTTAAGAACAGATATTTTTCCC
CHR	1761680	Rev	89.6833	e011								intergenic		1913n				5.75		-28	GACTGGCACTGGCATGGCACAGCATCGGGGTTCGAACACCATAAATAGTTTAGAACTCTCTATTCGTCGTG
CHR	1761736	Fwd	20.7733	e101	1761736	0			HVO_1914	377	LIP							7.28		-29	GATGAACAACTCGTCACGACGAATAGAGAGTTCTAAACTATTTATGGTGTTCGAACCCCGATGCTGTGCCA
CHR	1761963	Rev	10.12	e--1								aTSS	HVO_1914	1914n							ACGCGGAGATGATGGCCTGCATCGAGGAGGCGCACCAGCGGTTGATGCTCGTCGCGGGCGTCCCCTCGCCG
CHR	1763722	Rev	65.1867	e111								iTSS	HVO_1916	1916n1					1.91	-29	GCAGGACCAAGAAGTAGTCCAGACGGCCCGGAACATGGGCTTTACCGTCCATCACGGCGACGGAGCCGACA
CHR	1763842	Rev	13.16	e1-1								iTSS	HVO_1916	1916n2							CCGGATTGCAGAATACCTCGACGTCATCCCAATGCGTGTACTCATCATCGGAGGCGGGAAAGTGGGCCGTG
CHR	1765147	Rev	106.457	e110			1765132	15	HVO_1916	635	TP							5.95		-28	ATCCACAAGGCCGCGGAAATACCGCCCGAGATGTATGGTTTTATCTTCCGTCGTCACATGAACCGAATCCA
CHR	1765163	Fwd	7.74333	e--1								intergenic		1916n3					3.89	-27	CGACGAGCGGGATGAGGTTCGCCCCTCCTGCTGCGGCCACTTATATCGCCTCCATGGATTCGGTTCATGTG
CHR	1767262	Rev	84.89	e111	1767262	0			HVO_1917	666	LIP							7.75		-29	CCGCGGTATCGCGGGCTTTCAACAGACCGAACGTACATAGTTTTAAATGGTGAATGACAACTAACAGGACA
CHR	1768268	Rev	40.0833	e011	1768268	0			HVO_1918	302	GEN							7.77		-28	GGTCGCCCGTAATCAACGTGGGGGGTCGGGGCGACCGAACGCTTTTCTTCCCCGGAGACGGCCGTCAACTA
CHR	1768353	Fwd	13.6	e--1	1768353	0			HVO_1919	114	CHY								3.2	-28	TCCGGGGAAGAAAAGCGTTCGGTCGCCCCGACCCCCCACGTTGATTACGGGCGACCGCAAAGCCGTCTCCA
CHR	1768510	Fwd	14.9533	e1--								iTSS	HVO_1919	1919n							GGCTACAACCAGCGGGCCGTCGAGCGCGCCGTCGACGACCTCATGCAGGCGCACGTCTCCATGCTCGAATC
CHR	1770711	Rev	14.1433	e111								aTSS	HVO_1921	1921n							GCGCCTCGTCGAGTTCCGCTTCGAGCTCGTCGGCGCGGGTTTCGAGCTCCTGGAGCTCCTCTTTGAGTTCG
CHR	1772260	Rev	21.1833	e111	1772260	0			HVO_1922	117	GEN								3.91	-27	TCGACGGCAACACCGACAGGGCCGGCAGCGCCGGCGTCGGATTCTTCCCGCCCGCCGACGAAGAAAGCGCG
CHR	1772296	Fwd	6.65667	e1-1			1772389	93	HVO_1923	165	RMT										TACTGCCGGGCCAGATACGTCGCGTCGGGGTGCACGCGCTTTCTTCGTCGGCGGGCGGGAAGAATCCGACG
CHR	1772389	Fwd	33.8267	e110	1772389	0			HVO_1923	165	RMT							6.9		-27	TGTTGCCGTCGAACGCCCCGGCCGACACCGCGTTCGGGACGCTTTTCTCCGCCAGCCGCGTACCGCGGCTG
CHR	1773294	Rev	15.2533	e111	1773294	0			HVO_1924	120	CHY								4.71	-28	GCGCGGCCGGACGACCCGCCCCACCCGGGCCGCCACGAAGTTCTTGCCCGCCCGCGGCCTACCTCGACGCA
CHR	1775381	Rev	38.4467	e110	1775381	0			HVO_1926	250	GEN										CCGTTTCGAAGGCTACAGTCGCTCTTTGTCTCTAGCGCGGCTTGAATAGCTGAACCGACGTACGAGAGGTA
CHR	1776776	Rev	10.8333	e111	1776776	0			HVO_1927	434	GEN								1.51	-27	CGACGAGTCGGGCGCGGTGGGCGAGTAGCCGAGCCCCTGCTTATTTCACCGCCCGGGCCGACGTGAGGCCG
CHR	1778236	Rev	170.703	e111	1778232	4			HVO_1929	196	REG								3.32	-28	CGACCTCCGGGCGCGGTCGTGGTTTTCGGTTGACATAGGTGTTCAATACAGCGGCTGCTAAATGAGAGCCA
CHR	1779189	Fwd	88.98	e111	1779189	0			HVO_1931	205	GEN								1.84	-27	TCGACGCCGACGCCGCGCACCGGCGGGTCCGTTCCGCCCACCTTATCCGTCGCGGTGGCGAACCACCGGTA
CHR	1781150	Rev	138.97	e011	1781150	0			HVO_1933	112	GEN								2.76	-27	TCCGCGACCGTGGCGCGCCGAATCAGCCGTTTCGAGCTAGCTATTTGCCGCCGAACGACCAAAGAGGGGTA
CHR	1781186	Fwd	20.08	e11-								intergenic		1933n							GCGCTCACGACTCCGAGAAACGTGCGGCGGTACATACCCCTCTTTGGTCGTTCGGCGGCAAATAGCTAGCT
CHR	1781341	Rev	32.5367	e1-1			1781150	191	HVO_1933	112	GEN							6.66		-28	GAACCGCCGGGACCACTGCCGGCGGGGGCAAAAGGGTGGATTCTTGAACGTCCGACCCGGACTCCGATTCG
CHR	1782674	Rev	6.96	e1-1	1782674	0			HVO_1934	413	TL								4.66	-28	CGAGTCGCATACCGACACCACGCGACCGGCCTGAATAGTCGTTTTGTCAGTCGCGGCCGTAAGTCACGATA
CHR	1782735	Fwd	7.04	e111	1782735	0			HVO_1935	164	MIS							7.23		-27	CGTGTGGCATATCGTGACTTACGGCCGCGACTGACAAAACGACTATTCAGGCCGGTCGCGTGGTGTCGGTA
CHR	1783347	Fwd	5.28333	e--1	1783347	0			HVO_1936	251	COM										CCCGCCTGCGATACCGGCCCGGTTCGCCAGCATCCCGTCGTTTTTCACCGCCCTCGCCCTCCGAAGCGGTA
CHR	1784235	Rev	5.83667	e--1								aTSS	HVO_1937	1937n							CGGCCGCGAGTCGCGCGAGGACCGCGAAGGGGTCGCGGTTGTTGTAGTGACACGAGACGAAACACGAGTCG
CHR	1785181	Rev	16.3633	e1-1								iTSS	HVO_1937A	1937An				8.96		-28	GAGCGATCCGCTTACGACGGTGAGTTTCCTCTTCGGCAACGTCTTCATCCTGCTCGCCGTCGGCGCGTTCG
CHR	1785331	Rev	51.9533	e011	1785331	0			HVO_1937A	78	CHY							6.88		-28	AGTTCCACCGGACGGGTGAGCGCCGTGCGAAACCCACACAATCAATACCCCCGACTCCCGAGAGTCGCGCA
CHR	1785485	Fwd	6.43	e1-1	1785485	0			HVO_1938	75	GEN							5.74		-28	GGTTCGCGGCGGTCGTCCACCGCGCCGCTCGGTCGGCACCGATAAGCACCGCGCCCACGGACGCTGAGTCA
CHR	1788843	Fwd	12.25	e01-								aTSS	HVO_1940	1940n				5.44		-28	CGAGGTTCGGGTTCGTCACCTCGATGTAGTAGCCGTGGACCTGATTGTAACCGACCTCCAGCGAGTCGATG
CHR	1790288	Rev	7.99667	e1-1	1790288	0			HVO_1940	921	RRR							5.67		-28	GGCGCGGACGGGCGACCGCCCACCGCGTCGTTCCCGGCCGTTTTTATTGCTCGGCGACCCGCTTGAGGGTA
CHR	1790447	Fwd	62.35	e110			1790495	48	HVO_1941	318	MIS										GTGTGGGCGACCAGCAAGGCCAATGTACACGCCCAGCAAGGTTAGGTAGGCTGAGGCAATACTAACACGCA
CHR	1793758	Rev	21.79	e111								aTSS	HVO_1943	1943n							GGCGATGTCGCCGTCGGGTCGAGACACCCGAAGCGAGTACTCCTTGTTGGCTTCGAGCCACTCCTCGACCG
CHR	1796145	Rev	56.0833	e011								intergenic		1944n				5.67		-28	CAGCGACGGCGAGCACAGCGGTTCGTCGACTCATCACCCTCGTTTTGGAACTCCGTTCCGATATAAGCGTG
CHR	1797235	Fwd	67.05	e111								iTSS	HVO_1945	1945n							CGACGAGCGGTCCGACGACGATACGACCGCGACCGACGACGATACGACCGCGACCGACGACGATACGACGG
CHR	1797342	Fwd	1670.84	e001	1797346	4			HVO_1946	97	TL							8.1		-28	GCGCTTGAGGGCGCGGACGGCGACCCCGCCTCCCGATACTGTTTAATATCCCCATCTTGTAGGTCCACACT
CHR	1798814	Fwd	5.22	e--1								aTSS	HVO_1949	1949n							CGTCGTCGGCTCCGGCCGACGCGTCGTCGTCGCCCTCGGCTTCCTCTCCGAGCAGCGCGTCGCGGTAGACG
CHR	1799270	Fwd	3.64333	e1-1								aTSS	HVO_1950	1950n					1.82	-28	GGGTTTCCATCGCCAGTCGGTTCGGGGTCCGGACTTACGACTCTTTCCTGTCCGCGCCGTCGGTCTCCTCG
CHR	1800451	Fwd	9.33667	e1-1								intergenic		1951n							CGGCGCCTCGCCGACATCCGCACCGATGACGCTCGTGGGTATATCGGTCGCTGCTATCCAACTAGTGGTCG
CHR	1804306	Rev	42.2233	e010	1804306	0			HVO_1954	162	GEN								4.04	-28	TGAGCGTTCCTCCGGATTCCCGCAGGCCCGTGCCGTCGGGCTTTTGCGTGCCAACCACGTAGCGCCGGGCG
CHR	1805378	Fwd	12.2267	e111								aTSS	HVO_1955	1955n							AGACGGAGTCGGAGGCGGGGACGTGGCCGATACCGATACACGGACCACAGGTCGCCTCGGAGACGTTGACG
CHR	1807303	Fwd	224.31	e011								intergenic		1956n							ATCCCGATTTACGGGACGTTCTCGGCGATGACGAATTCCTTTCAAGTCGATGGGCGTCGTATCCCTTCTCG
CHR	1807565	Fwd	242.683	e001			1807573	8	HVO_1957	412	CP							6.81		-27	AGCCGCTTCGAGCGCGGCAGTCGGGTTCTCTGACCCAAAGGCACATTTACGCGCATACCTAAATGAGGCCA
CHR	1808190	Rev	63.0567	e111								aTSS	HVO_1957	1957n1					2.31	-27	CCTCGCCGATGAACTTCTGGACGAGTTCGGAGCCGGCCATCTTGATGAACGAGGCGTTGGTCTCGTTGGCG
[truncated: 2,750 more rows]

## Sheet: Tabelle1
Replicon	localinzation on the major chromosome (CHR) or one of the three minor chromosomes (pHV1, 3, 4)
5'-end position	TSS position on the replicon
Strand	DNA strand (fwd or rev)
Coverage average	average coverage of the three datasets -TEX; normalization steps lead from the read number to the coverage
Term4Enrichment	prediction of the respective TSS in the three datasets; "1" = predicted as TSS, "0" = seen as 5'-end, but no TSS prediction, "-" no 5'-end detected
Protein coding leaderless start	start of protein coding gene
leaderless start distance	distance between TSS and start codon (0 - 5 nt)
Coding 5'-UTR start	start of protein coding gene
UTR lenght	length of 5'-UTR (6 - 250 nt)
HVO number	designation of the protein coding gene (HVO_XXXX)
length (AA)	length of encoded protein (amino acids)
FC	functional class
Novel TSS class	class of novel TSS, i.e. intergenic TSS , iTSS, or aTSS
sense/antisense to	sense antisense to which gene (HVO-XXXX)
HVO sRNA novel	designation of novel gene
previously known RNA	name of previously-known RNA
previously known start	start position of previously known RNA
extension/reduction 5'-end	difference between TSS prediction and previously known start position
promoter score (stringent)	promoter score
promoter score (relaxed)	promoter score
distance TSS centered TATA box	distance between TSS and centered TATA box (optimal distance is 27/28 nt)
70 bp upstream of start	sequence upstream of start
